# Supplementary material for: Identification Of Prognostic Genes Associated With The Tumor Ecosystem In Pancreatic Ductal Adenocarcinoma
Source: Research Square preprint supplement (doi:10.21203/rs.3.rs-8698920/v1), 2026-02-16
Supplement: Supplementary file 1 [file 18373f2e14844c2fdd830c17.xlsx]

## Sheet: 01.uniCox_all
Results of univariate Cox regression analysis
id	HR	HR.95L	HR.95H	pvalue
KIF14	3.48922	1.99956	6.08869	1.08603e-05
ASPM	2.49171	1.64369	3.77727	1.69945e-05
BRIP1	2.47281	1.25543	4.87068	0.00885286
CHEK1	2.394	1.45295	3.94455	0.000611873
SMC4	2.33472	1.55898	3.49647	3.87397e-05
KIF23	2.33267	1.63972	3.31846	2.48096e-06
RALA	2.2786	1.52942	3.39475	5.14733e-05
ATP2C1	2.27768	1.32655	3.91077	0.00284038
BUB1B	2.24465	1.51738	3.3205	5.1844e-05
PPFIBP1	2.24328	1.4803	3.39951	0.00013932
STIL	2.23574	1.40194	3.56542	0.000727984
RACGAP1	2.22535	1.53769	3.22052	2.21986e-05
BUB1	2.2047	1.52929	3.1784	2.27396e-05
KIF11	2.19309	1.52504	3.15378	2.26742e-05
PLS3	2.15634	1.42518	3.26259	0.000275989
NMI	2.15497	1.45105	3.20037	0.000141849
SHCBP1	2.1431	1.44688	3.17433	0.000142947
E2F7	2.11827	1.40818	3.18644	0.000314489
DTL	2.07771	1.39073	3.10406	0.000356605
GPSM2	2.07727	1.30374	3.30974	0.00209814
PSEN1	2.06556	1.24006	3.44058	0.00532867
TES	2.04854	1.45125	2.89165	4.55045e-05
CDK1	2.03515	1.48592	2.78739	9.52062e-06
LDHA	2.02986	1.48775	2.76951	7.96955e-06
TPM4	2.00815	1.3733	2.93647	0.000322999
DLGAP5	2.00067	1.48652	2.69265	4.74547e-06
ECT2	1.98195	1.47829	2.65722	4.80864e-06
RASAL2	1.94349	1.22349	3.08719	0.00488909
CENPF	1.92928	1.40262	2.65368	5.34357e-05
PRC1	1.92449	1.42598	2.59728	1.87006e-05
GBP2	1.91966	1.38464	2.66141	9.14161e-05
CDC6	1.90847	1.37219	2.65435	0.000123138
PML	1.89376	1.25907	2.84839	0.00216842
PRR11	1.8579	1.33081	2.59377	0.000274013
PGM2	1.85548	1.21038	2.8444	0.00456944
TUBB	1.85426	1.215	2.82987	0.00419824
CCNA2	1.85035	1.35713	2.52281	9.99593e-05
CTTN	1.84396	1.25162	2.71664	0.00196676
NUF2	1.84379	1.29054	2.63421	0.00077596
MET	1.84178	1.47902	2.2935	4.83932e-08
MCM4	1.83783	1.33789	2.52458	0.000171989
PRKCI	1.83158	1.36797	2.45232	4.82149e-05
TAP2	1.82937	1.30915	2.55631	0.000403334
KIF4A	1.82058	1.33496	2.48285	0.000153686
LMNB1	1.8169	1.31962	2.50158	0.000252454
ITGB5	1.81537	1.35147	2.43852	7.48319e-05
BCL2L1	1.80052	1.29255	2.50813	0.000506407
DSC2	1.79088	1.29044	2.4854	0.000492374
TOP2A	1.78236	1.37263	2.3144	1.44754e-05
DEPDC1B	1.78102	1.31662	2.40922	0.000180774
ANLN	1.77727	1.42103	2.2228	4.68655e-07
TNFSF10	1.77143	1.3694	2.2915	1.33938e-05
EFNB2	1.76767	1.33362	2.34298	7.41272e-05
ARL6IP1	1.75663	1.27827	2.41401	0.00051342
FANCI	1.74792	1.23063	2.48266	0.00181397
NEK2	1.73393	1.30701	2.30029	0.000135293
ANXA2	1.72718	1.32642	2.24901	4.96736e-05
COLGALT1	1.71022	1.18957	2.45873	0.00376516
MKI67	1.67986	1.30054	2.16981	7.11595e-05
ATAD2	1.67788	1.14785	2.45265	0.00754391
TPX2	1.67323	1.33459	2.0978	8.13819e-06
IGF2BP3	1.67293	1.21769	2.29836	0.00149682
CCNB2	1.66384	1.30173	2.12668	4.78827e-05
CALU	1.65336	1.22786	2.22631	0.00092579
CORO1C	1.64514	1.14164	2.37072	0.00757279
ENO1	1.64002	1.20654	2.22924	0.00158412
IL18	1.62514	1.25127	2.11071	0.000272118
CDCP1	1.6242	1.26037	2.09304	0.000178001
CLIC1	1.62399	1.20844	2.18244	0.00130204
TXN	1.61825	1.18552	2.20892	0.00242982
TAP1	1.60895	1.23454	2.0969	0.000433119
OSMR	1.60832	1.20165	2.15264	0.00139808
PYGL	1.59151	1.23274	2.0547	0.00036331
TNFRSF21	1.59027	1.19019	2.12484	0.00170386
RUNX1	1.5885	1.1369	2.2195	0.00669277
TYMS	1.58797	1.15503	2.18319	0.00440851
MELK	1.57046	1.22344	2.01591	0.000395746
NT5E	1.56798	1.26725	1.94007	3.47294e-05
RAD51AP1	1.56344	1.19091	2.0525	0.00129008
TFRC	1.55621	1.16023	2.08736	0.00315805
ITGA6	1.5554	1.22333	1.97762	0.000312109
EZR	1.55155	1.2138	1.98328	0.000453461
SDC4	1.54597	1.2183	1.96178	0.000337457
CKS2	1.53789	1.2171	1.94324	0.000311
NDC80	1.53233	1.16848	2.00949	0.002031
PDGFC	1.52835	1.19307	1.95784	0.000787714
ITGA2	1.52281	1.22615	1.89126	0.000142324
FERMT1	1.52065	1.23339	1.87482	8.72277e-05
LAMA3	1.51887	1.2732	1.81194	3.43204e-06
ITGAV	1.51401	1.16363	1.9699	0.00201245
STAT1	1.5098	1.19472	1.90799	0.000561322
LGALS3	1.50778	1.21301	1.87419	0.000215778
SKIL	1.50343	1.13337	1.99432	0.00467771
AHR	1.49376	1.16821	1.91003	0.00137634
KRT8	1.48908	1.1848	1.87151	0.000640336
KRT18	1.48691	1.19027	1.85749	0.000475697
ITGA3	1.47719	1.21158	1.80102	0.000114453
TM4SF1	1.47283	1.20943	1.7936	0.000117433
TRIP10	1.45863	1.14885	1.85194	0.00194071
B3GNT3	1.45789	1.18148	1.79895	0.000440001
MPZL2	1.45287	1.19993	1.75912	0.000129393
IFI16	1.45221	1.1297	1.86679	0.00359399
KRT19	1.44656	1.2073	1.73323	6.27749e-05
UBE2T	1.4438	1.09334	1.90659	0.00962482
PLOD2	1.43884	1.1394	1.81699	0.00224203
ITGB1	1.4318	1.10021	1.86334	0.00757466
ANXA1	1.42907	1.18123	1.72891	0.000238861
LAMC2	1.42228	1.20957	1.67239	2.02615e-05
BHLHE40	1.42217	1.16075	1.74248	0.000678091
CAPG	1.41724	1.14387	1.75594	0.00142563
MACC1	1.41389	1.11627	1.79087	0.00407832
KDELR3	1.41373	1.11539	1.79187	0.00419727
P4HA1	1.41164	1.12419	1.77259	0.00300123
AK4	1.40707	1.11892	1.76944	0.00348917
DCBLD2	1.40666	1.17241	1.68772	0.000241272
EFNA5	1.40542	1.08802	1.81542	0.00916381
EREG	1.39953	1.18185	1.65731	9.73931e-05
EPHA2	1.39826	1.18414	1.6511	7.71817e-05
TFPI	1.39507	1.09524	1.777	0.007001
PLAUR	1.39157	1.1267	1.7187	0.00215966
PLAU	1.38133	1.17483	1.62412	9.21777e-05
WNT5A	1.38069	1.10469	1.72565	0.00458333
LAMB3	1.37976	1.17527	1.61983	8.38328e-05
KITLG	1.37535	1.09431	1.72855	0.00628043
UBE2C	1.37411	1.15152	1.63974	0.000424067
MXD1	1.37157	1.09675	1.71527	0.00561571
SLC20A1	1.36572	1.09247	1.70731	0.00621098
TGFBI	1.36091	1.1442	1.61866	0.000497381
PYGB	1.35645	1.08174	1.70092	0.00828049
MMP14	1.35261	1.11499	1.64087	0.00218213
SQLE	1.34769	1.07524	1.68916	0.0096108
MST1R	1.34341	1.12994	1.59722	0.000826975
LY6E	1.34276	1.1403	1.58117	0.000408727
TGM2	1.34116	1.13192	1.58907	0.000694398
BIRC3	1.33442	1.11852	1.59199	0.00135598
LOX	1.32886	1.09419	1.61387	0.00413241
TMPRSS4	1.32603	1.13446	1.54996	0.000393263
GALE	1.3218	1.07297	1.62832	0.00874525
SPOCK1	1.3216	1.07491	1.62489	0.00816217
TINAGL1	1.32084	1.09173	1.59804	0.00419776
GPR87	1.3131	1.15214	1.49654	4.45251e-05
BST2	1.31171	1.09072	1.57747	0.00394584
FAM83D	1.30637	1.11289	1.5335	0.00108376
PPARG	1.30511	1.09721	1.55241	0.00263163
SRPX2	1.30348	1.06617	1.59362	0.00974259
SLC16A3	1.303	1.09213	1.55459	0.00329981
SDC1	1.29763	1.08912	1.54606	0.00355562
SFN	1.29719	1.12873	1.4908	0.000246311
HK2	1.29647	1.0961	1.53346	0.00243595
SERPINB2	1.29297	1.07814	1.55061	0.00557921
IFITM1	1.29291	1.08333	1.54303	0.0044139
AREG	1.29287	1.12552	1.4851	0.000281388
PMEPA1	1.29235	1.08232	1.54315	0.0045955
LOXL2	1.28814	1.08271	1.53254	0.00428276
INHBA	1.2769	1.07985	1.50992	0.00426021
MXRA5	1.27197	1.07906	1.49938	0.00414829
DKK1	1.26751	1.12329	1.43026	0.000119921
MUC1	1.25988	1.10291	1.43919	0.000667273
SLC2A1	1.25134	1.08958	1.43711	0.00149953
PLAC8	1.24797	1.06667	1.46009	0.00567776
CXCL10	1.24755	1.09521	1.42108	0.000872724
COL12A1	1.24247	1.06768	1.44587	0.0050074
SEMA7A	1.23293	1.05411	1.44208	0.00881674
ECM1	1.23108	1.05658	1.43441	0.00768256
PTGS2	1.22915	1.06248	1.42196	0.00551843
MMP2	1.2227	1.05579	1.41598	0.00725236
FN1	1.21653	1.05663	1.40062	0.0064099
MMP7	1.20232	1.07087	1.34991	0.00181414
CRABP2	1.19701	1.0663	1.34375	0.00230362
GREM1	1.19546	1.04402	1.36886	0.00978392
KRT14	1.19073	1.0554	1.34342	0.00456996
SPP1	1.18128	1.05237	1.32598	0.00471746
COL11A1	1.16401	1.03914	1.30388	0.00871152
MMP11	1.15579	1.0384	1.28644	0.0080577
CXCL5	1.12093	1.03201	1.21751	0.00678563
APOH	0.818937	0.716171	0.93645	0.00350364
APLP1	0.817389	0.718092	0.930417	0.00227789
SFRP1	0.81395	0.700738	0.945452	0.00705914
IGFBP2	0.795221	0.676844	0.934303	0.00533132
PROX1	0.703137	0.546041	0.90543	0.00633311
PAX6	0.657884	0.483606	0.894967	0.00766069
KLKB1	0.574563	0.391249	0.843766	0.0047068
MCOLN3	0.446546	0.277569	0.718392	0.000889514
DTNA	0.384777	0.228483	0.647985	0.000328677
