# Supplementary material for: Identification Of Prognostic Genes Associated With The Tumor Ecosystem In Pancreatic Ductal Adenocarcinoma
Source: Research Square preprint supplement (doi:10.21203/rs.3.rs-8698920/v1), 2026-02-16
Supplement: Supplementary file 2 [file 1fe87b6904e8094c01bc6d45.xlsx]

## Sheet: 01.uniCox_0.05
Results of the PH assumption test
id	HR	HR.95L	HR.95H	pvalue
KIF14	3.48922	1.99956	6.08869	1.08603e-05
BRIP1	2.47281	1.25543	4.87068	0.00885286
CHEK1	2.394	1.45295	3.94455	0.000611873
ATP2C1	2.27768	1.32655	3.91077	0.00284038
ASPM	2.49171	1.64369	3.77727	1.69945e-05
STIL	2.23574	1.40194	3.56542	0.000727984
SMC4	2.33472	1.55898	3.49647	3.87397e-05
PSEN1	2.06556	1.24006	3.44058	0.00532867
PPFIBP1	2.24328	1.4803	3.39951	0.00013932
RALA	2.2786	1.52942	3.39475	5.14733e-05
BUB1B	2.24465	1.51738	3.3205	5.1844e-05
KIF23	2.33267	1.63972	3.31846	2.48096e-06
GPSM2	2.07727	1.30374	3.30974	0.00209814
PLS3	2.15634	1.42518	3.26259	0.000275989
RACGAP1	2.22535	1.53769	3.22052	2.21986e-05
NMI	2.15497	1.45105	3.20037	0.000141849
E2F7	2.11827	1.40818	3.18644	0.000314489
BUB1	2.2047	1.52929	3.1784	2.27396e-05
SHCBP1	2.1431	1.44688	3.17433	0.000142947
KIF11	2.19309	1.52504	3.15378	2.26742e-05
DTL	2.07771	1.39073	3.10406	0.000356605
RASAL2	1.94349	1.22349	3.08719	0.00488909
TPM4	2.00815	1.3733	2.93647	0.000322999
TES	2.04854	1.45125	2.89165	4.55045e-05
PML	1.89376	1.25907	2.84839	0.00216842
PGM2	1.85548	1.21038	2.8444	0.00456944
TUBB	1.85426	1.215	2.82987	0.00419824
CDK1	2.03515	1.48592	2.78739	9.52062e-06
LDHA	2.02986	1.48775	2.76951	7.96955e-06
CTTN	1.84396	1.25162	2.71664	0.00196676
DLGAP5	2.00067	1.48652	2.69265	4.74547e-06
GBP2	1.91966	1.38464	2.66141	9.14161e-05
ECT2	1.98195	1.47829	2.65722	4.80864e-06
CDC6	1.90847	1.37219	2.65435	0.000123138
CENPF	1.92928	1.40262	2.65368	5.34357e-05
NUF2	1.84379	1.29054	2.63421	0.00077596
PRC1	1.92449	1.42598	2.59728	1.87006e-05
PRR11	1.8579	1.33081	2.59377	0.000274013
TAP2	1.82937	1.30915	2.55631	0.000403334
MCM4	1.83783	1.33789	2.52458	0.000171989
CCNA2	1.85035	1.35713	2.52281	9.99593e-05
BCL2L1	1.80052	1.29255	2.50813	0.000506407
LMNB1	1.8169	1.31962	2.50158	0.000252454
DSC2	1.79088	1.29044	2.4854	0.000492374
KIF4A	1.82058	1.33496	2.48285	0.000153686
FANCI	1.74792	1.23063	2.48266	0.00181397
COLGALT1	1.71022	1.18957	2.45873	0.00376516
ATAD2	1.67788	1.14785	2.45265	0.00754391
PRKCI	1.83158	1.36797	2.45232	4.82149e-05
ITGB5	1.81537	1.35147	2.43852	7.48319e-05
ARL6IP1	1.75663	1.27827	2.41401	0.00051342
DEPDC1B	1.78102	1.31662	2.40922	0.000180774
CORO1C	1.64514	1.14164	2.37072	0.00757279
EFNB2	1.76767	1.33362	2.34298	7.41272e-05
TOP2A	1.78236	1.37263	2.3144	1.44754e-05
NEK2	1.73393	1.30701	2.30029	0.000135293
IGF2BP3	1.67293	1.21769	2.29836	0.00149682
MET	1.84178	1.47902	2.2935	4.83932e-08
TNFSF10	1.77143	1.3694	2.2915	1.33938e-05
ANXA2	1.72718	1.32642	2.24901	4.96736e-05
ENO1	1.64002	1.20654	2.22924	0.00158412
CALU	1.65336	1.22786	2.22631	0.00092579
ANLN	1.77727	1.42103	2.2228	4.68655e-07
RUNX1	1.5885	1.1369	2.2195	0.00669277
TXN	1.61825	1.18552	2.20892	0.00242982
TYMS	1.58797	1.15503	2.18319	0.00440851
CLIC1	1.62399	1.20844	2.18244	0.00130204
MKI67	1.67986	1.30054	2.16981	7.11595e-05
OSMR	1.60832	1.20165	2.15264	0.00139808
CCNB2	1.66384	1.30173	2.12668	4.78827e-05
TNFRSF21	1.59027	1.19019	2.12484	0.00170386
IL18	1.62514	1.25127	2.11071	0.000272118
TPX2	1.67323	1.33459	2.0978	8.13819e-06
TAP1	1.60895	1.23454	2.0969	0.000433119
CDCP1	1.6242	1.26037	2.09304	0.000178001
TFRC	1.55621	1.16023	2.08736	0.00315805
PYGL	1.59151	1.23274	2.0547	0.00036331
RAD51AP1	1.56344	1.19091	2.0525	0.00129008
MELK	1.57046	1.22344	2.01591	0.000395746
NDC80	1.53233	1.16848	2.00949	0.002031
SKIL	1.50343	1.13337	1.99432	0.00467771
EZR	1.55155	1.2138	1.98328	0.000453461
ITGA6	1.5554	1.22333	1.97762	0.000312109
ITGAV	1.51401	1.16363	1.9699	0.00201245
SDC4	1.54597	1.2183	1.96178	0.000337457
PDGFC	1.52835	1.19307	1.95784	0.000787714
CKS2	1.53789	1.2171	1.94324	0.000311
NT5E	1.56798	1.26725	1.94007	3.47294e-05
AHR	1.49376	1.16821	1.91003	0.00137634
STAT1	1.5098	1.19472	1.90799	0.000561322
UBE2T	1.4438	1.09334	1.90659	0.00962482
ITGA2	1.52281	1.22615	1.89126	0.000142324
FERMT1	1.52065	1.23339	1.87482	8.72277e-05
LGALS3	1.50778	1.21301	1.87419	0.000215778
KRT8	1.48908	1.1848	1.87151	0.000640336
IFI16	1.45221	1.1297	1.86679	0.00359399
ITGB1	1.4318	1.10021	1.86334	0.00757466
KRT18	1.48691	1.19027	1.85749	0.000475697
TRIP10	1.45863	1.14885	1.85194	0.00194071
PLOD2	1.43884	1.1394	1.81699	0.00224203
EFNA5	1.40542	1.08802	1.81542	0.00916381
LAMA3	1.51887	1.2732	1.81194	3.43204e-06
ITGA3	1.47719	1.21158	1.80102	0.000114453
B3GNT3	1.45789	1.18148	1.79895	0.000440001
TM4SF1	1.47283	1.20943	1.7936	0.000117433
KDELR3	1.41373	1.11539	1.79187	0.00419727
MACC1	1.41389	1.11627	1.79087	0.00407832
TFPI	1.39507	1.09524	1.777	0.007001
P4HA1	1.41164	1.12419	1.77259	0.00300123
AK4	1.40707	1.11892	1.76944	0.00348917
MPZL2	1.45287	1.19993	1.75912	0.000129393
CAPG	1.41724	1.14387	1.75594	0.00142563
BHLHE40	1.42217	1.16075	1.74248	0.000678091
KRT19	1.44656	1.2073	1.73323	6.27749e-05
ANXA1	1.42907	1.18123	1.72891	0.000238861
KITLG	1.37535	1.09431	1.72855	0.00628043
WNT5A	1.38069	1.10469	1.72565	0.00458333
PLAUR	1.39157	1.1267	1.7187	0.00215966
MXD1	1.37157	1.09675	1.71527	0.00561571
SLC20A1	1.36572	1.09247	1.70731	0.00621098
PYGB	1.35645	1.08174	1.70092	0.00828049
SQLE	1.34769	1.07524	1.68916	0.0096108
DCBLD2	1.40666	1.17241	1.68772	0.000241272
LAMC2	1.42228	1.20957	1.67239	2.02615e-05
EREG	1.39953	1.18185	1.65731	9.73931e-05
EPHA2	1.39826	1.18414	1.6511	7.71817e-05
MMP14	1.35261	1.11499	1.64087	0.00218213
UBE2C	1.37411	1.15152	1.63974	0.000424067
GALE	1.3218	1.07297	1.62832	0.00874525
SPOCK1	1.3216	1.07491	1.62489	0.00816217
PLAU	1.38133	1.17483	1.62412	9.21777e-05
LAMB3	1.37976	1.17527	1.61983	8.38328e-05
TGFBI	1.36091	1.1442	1.61866	0.000497381
LOX	1.32886	1.09419	1.61387	0.00413241
TINAGL1	1.32084	1.09173	1.59804	0.00419776
MST1R	1.34341	1.12994	1.59722	0.000826975
SRPX2	1.30348	1.06617	1.59362	0.00974259
BIRC3	1.33442	1.11852	1.59199	0.00135598
TGM2	1.34116	1.13192	1.58907	0.000694398
LY6E	1.34276	1.1403	1.58117	0.000408727
BST2	1.31171	1.09072	1.57747	0.00394584
SLC16A3	1.303	1.09213	1.55459	0.00329981
PPARG	1.30511	1.09721	1.55241	0.00263163
SERPINB2	1.29297	1.07814	1.55061	0.00557921
TMPRSS4	1.32603	1.13446	1.54996	0.000393263
SDC1	1.29763	1.08912	1.54606	0.00355562
PMEPA1	1.29235	1.08232	1.54315	0.0045955
IFITM1	1.29291	1.08333	1.54303	0.0044139
FAM83D	1.30637	1.11289	1.5335	0.00108376
HK2	1.29647	1.0961	1.53346	0.00243595
LOXL2	1.28814	1.08271	1.53254	0.00428276
INHBA	1.2769	1.07985	1.50992	0.00426021
MXRA5	1.27197	1.07906	1.49938	0.00414829
GPR87	1.3131	1.15214	1.49654	4.45251e-05
SFN	1.29719	1.12873	1.4908	0.000246311
AREG	1.29287	1.12552	1.4851	0.000281388
PLAC8	1.24797	1.06667	1.46009	0.00567776
COL12A1	1.24247	1.06768	1.44587	0.0050074
SEMA7A	1.23293	1.05411	1.44208	0.00881674
MUC1	1.25988	1.10291	1.43919	0.000667273
SLC2A1	1.25134	1.08958	1.43711	0.00149953
ECM1	1.23108	1.05658	1.43441	0.00768256
DKK1	1.26751	1.12329	1.43026	0.000119921
PTGS2	1.22915	1.06248	1.42196	0.00551843
CXCL10	1.24755	1.09521	1.42108	0.000872724
MMP2	1.2227	1.05579	1.41598	0.00725236
FN1	1.21653	1.05663	1.40062	0.0064099
GREM1	1.19546	1.04402	1.36886	0.00978392
MMP7	1.20232	1.07087	1.34991	0.00181414
CRABP2	1.19701	1.0663	1.34375	0.00230362
KRT14	1.19073	1.0554	1.34342	0.00456996
SPP1	1.18128	1.05237	1.32598	0.00471746
COL11A1	1.16401	1.03914	1.30388	0.00871152
MMP11	1.15579	1.0384	1.28644	0.0080577
CXCL5	1.12093	1.03201	1.21751	0.00678563
SFRP1	0.81395	0.700738	0.945452	0.00705914
APOH	0.818937	0.716171	0.93645	0.00350364
IGFBP2	0.795221	0.676844	0.934303	0.00533132
APLP1	0.817389	0.718092	0.930417	0.00227789
PROX1	0.703137	0.546041	0.90543	0.00633311
PAX6	0.657884	0.483606	0.894967	0.00766069
KLKB1	0.574563	0.391249	0.843766	0.0047068
MCOLN3	0.446546	0.277569	0.718392	0.000889514
DTNA	0.384777	0.228483	0.647985	0.000328677
