# Supplementary material for: Identification Of Prognostic Genes Associated With The Tumor Ecosystem In Pancreatic Ductal Adenocarcinoma
Source: Research Square preprint supplement (doi:10.21203/rs.3.rs-8698920/v1), 2026-02-16
Supplement: Supplementary file 3 [file 47afe416e66818804d1e489c.xlsx]

## Sheet: 06.cell_cor
Results of correlations between differential immune cells
cell1	cell2	Correlation	Pvalue
Activated CD4 T cell	Activated CD4 T cell	1	0
Activated CD8 T cell	Activated CD4 T cell	0.673601	3.05606e-27
Central memory CD4 T cell	Activated CD4 T cell	0.432754	1.57705e-24
Eosinophil	Activated CD4 T cell	0.377869	1.07e-05
MDSC	Activated CD4 T cell	0.623302	1.46238e-27
Monocyte	Activated CD4 T cell	0.276434	9.36281e-05
Plasmacytoid dendritic cell	Activated CD4 T cell	0.436049	1.08885e-09
T follicular helper cell	Activated CD4 T cell	0.594821	3.23085e-18
Type 2 T helper cell	Activated CD4 T cell	0.488825	3.76361e-20
Activated CD4 T cell	Activated CD8 T cell	0.673601	3.05606e-27
Activated CD8 T cell	Activated CD8 T cell	1	0
Central memory CD4 T cell	Activated CD8 T cell	0.563801	1.61582e-15
Eosinophil	Activated CD8 T cell	0.406566	2.61576e-12
MDSC	Activated CD8 T cell	0.77418	7.99205e-33
Monocyte	Activated CD8 T cell	0.58046	4.59661e-19
Plasmacytoid dendritic cell	Activated CD8 T cell	0.591184	8.77984e-17
T follicular helper cell	Activated CD8 T cell	0.724427	1.45852e-29
Type 2 T helper cell	Activated CD8 T cell	0.23665	0.000361699
Activated CD4 T cell	Central memory CD4 T cell	0.432754	1.57705e-24
Activated CD8 T cell	Central memory CD4 T cell	0.563801	1.61582e-15
Central memory CD4 T cell	Central memory CD4 T cell	1	0
Eosinophil	Central memory CD4 T cell	0.430687	0.00061157
MDSC	Central memory CD4 T cell	0.711543	6.78627e-40
Monocyte	Central memory CD4 T cell	0.388001	0.00209236
Plasmacytoid dendritic cell	Central memory CD4 T cell	0.607975	6.81967e-20
T follicular helper cell	Central memory CD4 T cell	0.69619	3.08881e-22
Type 2 T helper cell	Central memory CD4 T cell	0.172661	1.68646e-12
Activated CD4 T cell	Eosinophil	0.377869	1.07e-05
Activated CD8 T cell	Eosinophil	0.406566	2.61576e-12
Central memory CD4 T cell	Eosinophil	0.430687	0.00061157
Eosinophil	Eosinophil	1	0
MDSC	Eosinophil	0.504178	7.84457e-10
Monocyte	Eosinophil	0.411422	3.10508e-10
Plasmacytoid dendritic cell	Eosinophil	0.565204	2.24582e-14
T follicular helper cell	Eosinophil	0.56606	1.89247e-17
Type 2 T helper cell	Eosinophil	0.142239	0.215052
Activated CD4 T cell	MDSC	0.623302	1.46238e-27
Activated CD8 T cell	MDSC	0.77418	7.99205e-33
Central memory CD4 T cell	MDSC	0.711543	6.78627e-40
Eosinophil	MDSC	0.504178	7.84457e-10
MDSC	MDSC	1	0
Monocyte	MDSC	0.612283	1.63807e-12
Plasmacytoid dendritic cell	MDSC	0.773669	3.21113e-34
T follicular helper cell	MDSC	0.925615	6.75713e-60
Type 2 T helper cell	MDSC	0.269049	7.0584e-09
Activated CD4 T cell	Monocyte	0.276434	9.36281e-05
Activated CD8 T cell	Monocyte	0.58046	4.59661e-19
Central memory CD4 T cell	Monocyte	0.388001	0.00209236
Eosinophil	Monocyte	0.411422	3.10508e-10
MDSC	Monocyte	0.612283	1.63807e-12
Monocyte	Monocyte	1	0
Plasmacytoid dendritic cell	Monocyte	0.574281	4.76131e-12
T follicular helper cell	Monocyte	0.603815	7.68979e-17
Type 2 T helper cell	Monocyte	-0.0252498	0.645108
Activated CD4 T cell	Plasmacytoid dendritic cell	0.436049	1.08885e-09
Activated CD8 T cell	Plasmacytoid dendritic cell	0.591184	8.77984e-17
Central memory CD4 T cell	Plasmacytoid dendritic cell	0.607975	6.81967e-20
Eosinophil	Plasmacytoid dendritic cell	0.565204	2.24582e-14
MDSC	Plasmacytoid dendritic cell	0.773669	3.21113e-34
Monocyte	Plasmacytoid dendritic cell	0.574281	4.76131e-12
Plasmacytoid dendritic cell	Plasmacytoid dendritic cell	1	0
T follicular helper cell	Plasmacytoid dendritic cell	0.760169	1.31864e-32
Type 2 T helper cell	Plasmacytoid dendritic cell	0.235047	0.000166618
Activated CD4 T cell	T follicular helper cell	0.594821	3.23085e-18
Activated CD8 T cell	T follicular helper cell	0.724427	1.45852e-29
Central memory CD4 T cell	T follicular helper cell	0.69619	3.08881e-22
Eosinophil	T follicular helper cell	0.56606	1.89247e-17
MDSC	T follicular helper cell	0.925615	6.75713e-60
Monocyte	T follicular helper cell	0.603815	7.68979e-17
Plasmacytoid dendritic cell	T follicular helper cell	0.760169	1.31864e-32
T follicular helper cell	T follicular helper cell	1	0
Type 2 T helper cell	T follicular helper cell	0.259665	0.000193472
Activated CD4 T cell	Type 2 T helper cell	0.488825	3.76361e-20
Activated CD8 T cell	Type 2 T helper cell	0.23665	0.000361699
Central memory CD4 T cell	Type 2 T helper cell	0.172661	1.68646e-12
Eosinophil	Type 2 T helper cell	0.142239	0.215052
MDSC	Type 2 T helper cell	0.269049	7.0584e-09
Monocyte	Type 2 T helper cell	-0.0252498	0.645108
Plasmacytoid dendritic cell	Type 2 T helper cell	0.235047	0.000166618
T follicular helper cell	Type 2 T helper cell	0.259665	0.000193472
Type 2 T helper cell	Type 2 T helper cell	1	0
