# Supplementary material for: Identification Of Prognostic Genes Associated With The Tumor Ecosystem In Pancreatic Ductal Adenocarcinoma
Source: Research Square preprint supplement (doi:10.21203/rs.3.rs-8698920/v1), 2026-02-16
Supplement: Supplementary file 4 [file 6208b88b13e475e593735984.xlsx]

## Sheet: TEGs
Detailed information on TERGs
symbols
B2M
HLA-A
HLA-B
HLA-C
TAP1
TAP2
TAPBP
CIITA
HLA-DMA
HLA-DMB
HLA-DPA1
HLA-DPB1
HLA-DQA1
HLA-DQB1
HLA-DRA
HLA-DRB1
CD27
CD28
CD40
CD40LG
CD70
CD80
CD83
CD86
ICOS
ICOSLG
TNFRSF4
TNFRSF9
TNFSF4
TNFSF9
CD8A
CD8B
EOMES
FASLG
GNLY
GZMA
GZMB
GZMK
IFNG
PRF1
TBX21
ZAP70
CCL3
CCL4
CCL5
CX3CL1
CX3CR1
CXCL10
CXCL11
CXCL9
CXCR3
CD160
CD226
CD244
FGFBP2
GZMH
KIR2DL4
KLRC2
KLRF1
KLRK1
NCR1
NCR3
NKG7
SH2D1B
CD3D
CD3E
CD3G
CD5
ITK
TRAC
TRAT1
TRBC1
TRBC2
BLK
CD19
CD22
CD79A
CD79B
CR2
FCRL5
MS4A1
PAX5
STAP1
TNFRSF13B
TNFRSF13C
TNFRSF17
CMKLR1
IL12A
IL12B
IL1B
IL23A
IRF5
NOS2
SOCS3
TNF
IL12RB2
IL2
IL21
STAT4
IFNA2
IFNB1
TNFSF10
BTLA
CD274
CTLA4
HAVCR2
LAG3
PDCD1
PDCD1LG2
TIGIT
VSIR
CCR8
FOXP3
IKZF2
IKZF4
IL10
TNFRSF18
CCL1
CCL17
CCL22
CCL28
CCR10
CCR4
CD177
CTSG
CXCR1
CXCR2
ELANE
FCGR3B
FFAR2
MPO
PGLYRP1
PRTN3
CCL11
CCR3
CXCL1
CXCL2
CXCL5
CXCL8
KITLG
ARG1
CYBB
IDO1
IL4I1
IL6
PTGS2
CCL15
CCL26
CSF1
CSF1R
CSF2
CSF2RA
CSF3
CSF3R
CXCL12
CXCR4
IL6R
CD163
CD68
MRC1
MSR1
SIGLEC1
CCL2
CCL7
CCL8
CCR2
XCL1
XCR1
GATA3
IL13
IL4
IL5
IL22
MIF
TGFB1
TGFB2
TGFB3
ACTA2
CD248
COL1A1
COL1A2
COL5A1
COL6A1
COL6A2
COL6A3
FAP
FBLN1
FGF2
LRP1
LUM
MFAP5
MMP2
MMP3
PDGFRA
PDGFRB
COL11A1
COL3A1
COL4A1
ELN
FN1
LAMA3
LAMB3
LAMC2
LGALS7
LGALS9
TNC
VTN
ADAMTS4
ADAMTS5
CA9
LOX
MMP1
MMP11
MMP12
MMP7
MMP9
PLOD2
ANGPT1
ANGPT2
CDH5
FLT1
KDR
PDGFC
PGF
TEK
VEGFA
VEGFB
VEGFC
VWF
CLEC14A
ENG
MMRN1
MMRN2
NOS3
VCAM1
AURKA
AURKB
BUB1
CCNB1
CCND1
CCNE1
CDK2
CETN3
E2F1
ESCO2
MCM2
MCM6
MKI67
MYBL2
PLK1
CDH2
SNAI1
SNAI2
TWIST1
TWIST2
ZEB1
ZEB2
A2M
ADAMTS1
ADIRF
APOLD1
CALM2
CAV1
CAVIN3
CPE
CPM
CRIP1
CRIP2
CRYAB
CSRP1
CSRP2
CYB5R3
FAM13C
FILIP1
FRZB
GJA4
GUCY1A1
GUCY1B1
ID3
IGFBP7
ISYNA1
ITGB1
KCNE4
MAP1B
MCAM
MEF2C
MGST3
MYH11
MYLK
NDRG2
NDUFA4L2
NDUFS4
OAZ2
OLFML2A
PHLDA1
PPP1R14A
PTP4A3
RGS16
RGS5
SPARCL1
TAGLN
TIMP3
TINAGL1
TPM1
TPM2
UBA2
YIF1A
ADAM12
ANGPTL2
ANGPTL4
ANTXR1
ASPN
C1R
C1S
CCN2
COL12A1
COL8A1
CPXM1
CRABP2
CTHRC1
CTSK
CYP1B1
DCN
EMP1
GREM1
HTRA3
IGFBP3
INHBA
ITGA11
ITGA5
LGALS1
LMNA
LOXL1
LOXL2
MGP
MORF4L2
P4HA3
PDLIM4
PLAU
PLAUR
POSTN
PRSS23
RARRES2
RIN2
SERPINE1
SERPINF1
SFRP2
SPHK1
SPON2
STEAP1
SULF1
TGFBI
THBS2
THY1
TIMP1
TMEM119
TMEM176B
TNFAIP6
TNFRSF12A
TPM4
UAP1
VCAN
ABI3BP
ADH1B
C3
CCDC80
CCN1
CCN5
CFD
CST3
DPT
EFEMP1
FHL1
FHL2
FIBIN
GPC3
GPX3
GSN
IGF1
IGFBP5
IGFBP6
KLF4
MFAP4
MGST1
PLA2G2A
PODN
PTGDS
RARRES1
SELENOP
SFRP4
SLC40A1
TMEM176A
ABL2
APOD
CDKN1A
CLU
DUSP1
EGR1
FOSB
GADD45B
GEM
GFPT2
ICAM1
IER3
JUNB
NFKBIA
NR4A1
NR4A3
OGN
PIM1
SAT1
SOD2
THBS1
TNFAIP2
ZFP36
DIAPH3
NUSAP1
ANKRD1
CHI3L1
EVI2B
LPXN
MCTP2
MME
NOX4
OXTR
PTPRB
ST6GALNAC5
SYT14
TBC1D2
THBS4
TLR4
ACAT1
C5AR2
DES
FGF1
HGF
PDGFB
S100A4
SPP1
VIM
CLCF1
CXCL14
EREG
GDNF
IL11
IL1A
LIF
NGF
ACVRL1
ADGRA2
BMPER
CCBE1
CCND2
CD34
CDC42
CIB1
E2F7
E2F8
EDN1
EFNB2
EGR3
EPHB4
ESM1
FGF18
FGFR1
FLT4
FOXC2
GPLD1
HEY1
ID1
ITGAV
JAG1
JAG2
JMJD6
MAPK14
MMP14
NOTCH1
NRARP
NRP1
OTULIN
PARVA
PDGFA
PIK3CA
PIK3R1
PTK2
PTK2B
RAMP2
RNF213
ROBO1
RSPO3
SEMA5A
SHC1
SOX18
SRF
SRPX2
STC1
TAL1
TDGF1
TYMP
VAV2
VEGFD
AEN
AIFM1
APAF1
ATF4
ATM
BAK1
BBC3
BCAP31
BCL10
BCL2L11
BID
BMF
BOK
BRCA2
CASP2
CASP4
CASP9
CDIP1
CIDEB
COA8
CRADD
DAB2IP
DAPK3
DDIT3
DDIT4
DEDD2
DNM1L
DYRK2
E2F2
EP300
G0S2
IFI16
KRT8
MLLT11
MOAP1
NFATC4
NUPR1
P2RX7
PHLDA3
PMAIP1
POLB
PPP1R13B
PPP2R1B
PPP2R5C
PYCARD
RIPK3
SHISA5
SIVA1
SKIL
SNW1
SORT1
ST20
STK3
STK4
TMEM109
TNFRSF1A
TNFRSF1B
TNFRSF21
TP53BP2
USP28
WWOX
AKIRIN2
ANLN
ANP32E
APEX2
ASF1B
ATAD2
BORA
BRIP1
CASP8AP2
CBX5
CCNA2
CCNB2
CCNE2
CCNF
CDC25A
CDC25B
CDC25C
CDC45
CDC6
CDCA2
CDCA3
CDCA5
CDCA7L
CDCA8
CENPA
CENPE
CENPM
CENPW
CHAF1A
CHAF1B
CKAP2L
CKAP5
CKS1B
CKS2
CLSPN
DEPDC1B
DHFR
DLGAP5
DSCC1
DSN1
DTL
DTYMK
E2F5
ECT2
ENOSF1
EXO1
FAM83D
FANCI
FEN1
GAS2L3
GCLM
GINS2
GRPEL1
GTSE1
H1-0
H2AX
H4C3
HELLS
HJURP
HMGB3
HMMR
INTS8
KIF11
KIF22
KIF23
KIF2C
KIF5B
KIFC1
KPNA2
LBR
LYAR
MCM4
MCM5
MCM7
MND1
MRPS18B
MZT1
NASP
NCAPD2
NDC80
NEK2
NUCKS1
NUF2
NUP37
ORC6
PBK
PCNA
PIF1
POLA1
POLA2
POLD3
PRC1
PRIM1
PRR11
PSRC1
PTTG1
RAD21
RAD51AP1
RAN
RANGAP1
RFC2
RFC3
RFC4
RFC5
RPA2
RRM1
RRM2
SAP30
SHCBP1
SLBP
SMC4
SRSF3
TACC3
TIPIN
TMPO
TOP2A
TROAP
TTK
TUBB
TUBB4B
TUBG1
TYMS
UBE2T
UBR7
UHRF1
UNG
USP1
VRK1
WDR76
ZWILCH
ZWINT
ABL1
ACVR1
ADA
AGT
AKT1
ANXA1
ARX
ATG5
ATOH1
ATP11C
ATP2B2
ATP7A
AXL
BATF
BCL11B
BCL2
BCL3
BLOC1S6
BMP10
BMP2
BMP6
BRAF
CASP8
CAV3
CCL19
CDK1
CDON
CEBPA
CEBPB
CLIC5
CREB1
CYP26B1
DCSTAMP
DLL4
DRD1
EDN3
EDNRB
EMX1
EPHA2
ERBB4
ERCC2
FADD
FAM20C
FGF8
FGFR2
FLT3LG
FOXA1
FOXP1
GATA1
GATA4
GATA6
GDF7
GDPD5
GNAS
GSX2
HDAC2
HEY2
HHEX
HIF1A
HMGB1
HOXA5
IL15
IL20
IL23R
IL31RA
IL4R
ILK
INSM1
IRF4
JUN
KDM1A
KDM6B
KIT
LAMB2
LEF1
LEP
LHFPL5
LHX1
LYN
MAML1
MAP2K1
MAPK3
MCOLN3
MEF2A
MESP1
MTOR
MYF5
MYF6
MYH9
MYLK3
MYO7A
MYOD1
MYOG
NCKAP1L
NFATC2
NFIB
NKAP
NKX2-1
NKX2-3
NRG1
NTRK1
NTRK2
OCSTAMP
OVOL2
PAFAH1B1
PAX2
PDZD7
PF4
PITX2
PLS3
POU4F3
PPARG
PRDM1
PROM1
PROX1
PSEN1
PTGER4
PTN
PTPN11
PTPRZ1
RAC1
RAG1
RB1
RELB
RUNX1
RUNX2
RXRA
SAV1
SCRIB
SEC24B
SEMA4A
SEMA7A
SHOX2
SLC4A7
SLC9A3R1
SLITRK6
SMAD4
SOD1
SOX10
SOX11
SOX4
SOX6
SP3
SPI1
STAT5B
STK11
STRC
SYK
TENM4
TGFBR2
THRA
TMC1
TMEM100
TNFSF11
TP63
TRAF6
TSC1
TSPAN2
WDPCP
WNT11
WNT5B
WNT7A
WNT8A
WT1
ZBTB1
ABRAXAS1
ARID3A
ATR
BABAM1
BABAM2
BAX
BCL2L2
BLM
BRCA1
BRCC3
BTG2
CARM1
CDK5RAP3
CDKN1B
CENPJ
CHEK1
CHEK2
CNOT1
CNOT10
CNOT11
CNOT2
CNOT3
CNOT4
CNOT6
CNOT6L
CNOT7
CNOT8
CNOT9
DNAJA1
E2F4
FOXM1
FOXN3
FOXO4
GADD45A
GML
HIC1
HIPK2
HMGA2
ING4
KAT5
MAD2L2
MDM2
MDM4
MRE11
MUC1
NBN
NEK11
NPM1
PCBP4
PIDD1
PLAGL1
PLK2
PLK3
PML
PRKDC
PRMT1
PSMD14
PSME4
RAD9A
RBBP6
RBL2
RBM38
RGCC
RNF168
RPS27A
RPS3
RPS6KA6
SFN
SP100
SPIDR
SYF2
TAOK3
TFAP4
TFDP1
TFDP2
TNKS1BP1
TP53
TP73
TRIAP1
UBA52
UBB
UBC
UBE2N
UIMC1
XPC
ZNF385A
ALKBH2
ALKBH3
APEX1
CCNH
CCNO
CDK7
CETN2
DDB1
DDB2
ERCC1
ERCC3
ERCC4
ERCC8
FANCA
FANCB
FANCC
FANCD2
FANCE
FANCF
FANCG
FANCL
FANCM
GTF2H1
GTF2H3
GTF2H4
GTF2H5
HMGB2
LIG1
LIG3
LIG4
MBD4
MGMT
MNAT1
MPG
MUTYH
NTHL1
OGG1
PALB2
PARP1
POLD1
POLD2
POLD4
POLE
POLE2
POLH
POLI
POLK
POLL
POLN
POLR2C
POLR2D
POLR2E
POLR2F
POLR2G
POLR2H
POLR2I
POLR2J
POLR2K
RAD23B
RAD50
RAD51B
RAD51C
RAD51D
RAD52
REV1
REV3L
RFC1
RIF1
RPA1
RPA3
RRM2B
SIRT1
SMUG1
SSRP1
TDG
TDP1
TOP3A
TP53BP1
UBE2V2
WRN
WRNIP1
XAB2
XPA
XRCC1
XRCC2
XRCC3
XRCC4
XRCC5
XRCC6
BGN
CAMK2N1
CD44
CDH11
COL5A2
CTSB
CXCL6
DAB2
DCK
DDR2
ECM1
EFNA1
ENC1
ENOPH1
EPB41L5
ERG
FBLN2
FBLN5
FBN1
FSTL1
GAS1
GSC
HAS2
HTRA1
IGFBP4
MCM3
MYL9
NR2F1
NT5E
ODC1
OLFM1
PCOLCE
PLK4
PPIC
PRRX1
PTX3
RBL1
RGS4
SDC1
SDCBP
SERPINH1
SPOCK1
TGFBR1
TGFBR3
TUBA1A
TUBB3
WNT16
WNT2
WNT5A
ADM
ADORA2B
AK4
AKAP12
ALDOC
ANG
ATF3
BHLHE40
BNIP3
BNIP3L
CA12
CCNG2
CITED2
EGLN1
EGLN3
ENO2
ERO1A
F3
FAM162A
FOS
GYS1
HILPDA
HK1
HK2
HMOX1
KDM3A
KLF6
KLF7
KLHL24
LDHA
MAFF
MXI1
NDRG1
NFIL3
NR3C1
P4HA1
P4HA2
PAM
PDK1
PFKFB3
PFKFB4
PFKP
PGK1
PGM1
PLIN2
PPFIA4
PPP1R3C
RNASE4
SLC2A1
SLC2A3
SPAG4
STBD1
STC2
TMEM45A
TPI1
TXNIP
VLDLR
ZNF292
ZNF395
ACOD1
ACSL1
ATP2B1
B4GALT1
CCL18
CCL20
CCL23
CCR7
CCRL2
CD55
CD6
CXCL3
DENND5A
DRAM1
F12
FCER1G
FOSL1
FSCN1
FUT4
GCH1
IL18
IL1R1
IRAK2
ITGB8
KIF1B
KLKB1
LITAF
MAP2K3
MARCKS
NAMPT
NFKB1
NFKB2
NINJ1
OLR1
OSM
OSMR
PLPP3
PPP1R15A
RASGRP1
REL
RELA
RIPK2
RNF144B
S100A8
SDC4
SERPINB2
SLC1A2
SLC28A2
SNN
STAT5A
TLR2
TLR7
TNIP1
TNIP2
TRIP10
TSLP
ZC3H12A
AEBP1
AKR1B1
AMD1
ATP5PB
BAG1
C1QB
CALD1
CAPG
CBX1
CEMIP
CLEC4A
COL10A1
COMP
COPZ2
CRISPLD2
CSE1L
DDX5
EDNRA
H2AZ1
HNRNPDL
HNRNPM
HNRNPU
HSD17B4
IFI30
ITGBL1
LAMB1
LAMC1
LRRC15
LRRC17
MXRA5
NDUFB7
NID2
NUAK1
OLFML2B
PNN
PROS1
PSMA2
PSMB4
RALY
RRAS2
SEPHS2
SLC25A5
TMEM158
TP53I3
TUBB6
TXNDC9
WWTR1
YBX1
ACKR3
AFP
AGR2
ALDH1A1
ANXA2
AQP5
BMI1
BSG
CCDC88A
CD24
CDCP1
CDH17
CEACAM1
CEACAM5
CLIC1
CRP
CTNND1
CTSL
CTTN
EGF
EGFR
EPAS1
EPCAM
ERBB2
ERBB3
ESR1
ESR2
EZH2
EZR
F2RL1
FLOT2
GLI1
HMGA1
HPSE
IGF1R
IGF2BP3
ITGA3
ITGA6
ITGB3
KRAS
KRT19
L1CAM
LASP1
LGALS3
MACC1
MET
MMP13
MSN
MST1R
MTA1
MTDH
MYC
NEDD9
PDPN
PKM
PRKCI
PSCA
PTHLH
PXN
RAB25
RHOC
ROCK1
SATB1
SELE
SELP
SNCG
SPARC
SRC
STAT3
STMN1
TERT
TGM2
TMPRSS4
WASF3
YAP1
ADK
AGER
ASCL1
ASPM
BMPR1A
BMPR2
BUB1B
CD74
CDC20
CTC1
CYBA
DCT
DISC1
DOCK7
EBI3
FGF7
FGF9
FZD3
GINS1
ID2
ID4
IGFBP2
IRS2
KIF14
LHX5
MED1
MELK
NUMBL
OSR1
PRKD1
PTPRC
RACGAP1
SLAMF1
SMO
STAT1
TBX1
TK1
WNT1
WNT3A
XBP1
ZNF335
ALOX5
ANXA5
AREG
CREM
CRHBP
CXCL13
CYTIP
EVI2A
FNBP1
FXR1
GBP2
GLIPR1
H2AC6
H2BC12
H2BC21
HBB
HLX
IL18R1
MLLT3
MPZL2
NFAT5
NR4A2
NRIP1
OPTN
PCDH9
PMCH
PPFIBP1
RBPMS
RGS1
RHAG
SPTBN1
SVIL
TCF7L2
TFPI
TGFB1I1
TM4SF1
TPBG
TPSB2
TRA2A
TRA2B
TSPAN31
VNN1
ZBTB10
ABCG2
AFMID
ALDH1A3
ANPEP
APC
AQP1
ASCL2
AXIN2
AZGP1
BAZ2B
BOC
C6orf62
CA2
CD200
CD33
CD38
CDCA7
CDK6
CFTR
CHD7
CORO1C
DBX1
DBX2
DNER
DNMT3A
DPP4
EBF1
EEF1A1
EIF4B
EMX2
EPHB2
ETS2
ETV1
FABP7
FBLIM1
FBXO27
FERMT1
FOXA2
FOXA3
FOXG1
GATA2
GFAP
GFI1
GPM6A
GPSM2
GPX2
H19
H3-3B
HACD3
HAPLN1
HEPN1
HES1
HNRNPH1
HNRNPL
HOPX
IDH1
IKZF1
IRX3
ITGAM
KLK10
KRT14
LATS2
LGR5
LOH12CR2
LRATD1
LRIG1
LY6D
LYZ
MALAT1
MBOAT1
MESP2
METTL3
MLLT10
MYB
NANOG
NCAM1
NEK5
NELL2
NFE2
NFIA
NKX2-5
NODAL
OLFM4
OPHN1
PABPC1
PAX6
POU5F1
PTK7
PTMA
PTPRG
PTPRO
PTPRS
QPCTL
RAB42
RAMP2-AS1
RBM6
RGMB
RNF43
SET
SLC12A2
SMAD2
SMOC2
SOX1
SOX17
SOX2
SOX3
SOX9
SPDYE1
SPDYE5
SPHKAP
SRGAP2C
STMN2
TATDN3
TCF12
TCF4
TFRC
TNFAIP8L1
TOX3
TSPAN6
UGT8
ZBTB8A
ZNF793
LAIR1
CD2
CD84
CRTAM
HAVCR1
LTBR
LY9
SLAMF8
TNFRSF14
TNFRSF25
TNFRSF8
GBE1
PFKL
ALDOA
GPI
ENO1
GAPDH
GCK
RBPJ
ISG20
GALK1
WSB1
PYGM
BTG1
EXT1
PDK3
ANKZF1
UGP2
ALDOB
ERRFI1
ENO3
PNRC1
GAPDHS
CHST2
BCAN
AMPD3
NDST1
GAA
PKLR
IGFBP1
LARGE1
NOCT
RRAGD
EDN2
IDS
RORA
DPYSL4
KDELR3
DTNA
HS3ST1
CAVIN1
GPC4
TNFAIP3
HEXA
PGM2
PRDX5
NAGK
BRS3
TKTL1
MT1E
MT2A
SDC3
TIPARP
PKP1
PGAM2
PRKCA
SLC37A4
EFNA3
CP
CHST3
TPD52
LXN
B4GALNT2
PPARGC1A
GCNT2
HAS1
SCARB1
SLC25A1
SDC2
CASP6
VHL
FOXO3
B3GALT6
SLC2A5
SRPX
GLRX
SIAH2
PLAC8
FBP1
TPST2
PHKG1
CDKN1C
GRHPR
PCK1
INHA
HSPA5
NDST2
NEDD4L
XPNPEP1
SLC6A6
MAP3K1
LDHC
TES
KIF5A
LALBA
GPC1
HDLBP
ILVBL
NCAN
ETS1
HOXB9
SELENBP1
FOSL2
SULT2B1
POLR2A
POLR1C
SUPT4H1
POLR3GL
POLR3C
GTF2B
POLR1D
NCBP2
NELFE
GTF2F1
ERCC5
NELFB
ELL
TAF10
SUPT5H
SNAPC5
ELOA
TAF12
NELFCD
TAF13
TAF6
TAF9
GTF2A2
VPS37D
NME1
RNMT
POLE4
VPS37B
NT5C3A
SNAPC4
AAAS
ZNRD1
ITPA
POM121
BRF2
SAC3D1
CLP1
NME4
VPS28
TSG101
USP11
TAF1C
TARBP2
CANT1
PDE4B
DGCR8
RAD51
SURF1
PNP
NME3
GTF3C5
NT5C
AK1
HCLS1
APRT
IMPDH2
SF3A3
DAD1
UPF3B
GUK1
ADRM1
SEC61A1
ZNF707
NUDT9
PDE6G
NFX1
ADCY6
ARL6IP1
DGUOK
SMAD5
DUT
AGO4
RALA
BCAM
TK2
CSTF3
HPRT1
BOLA2
GPX4
MPC2
CDA
ALYREF
MRPL40
NPR2
EDF1
GSDME
TMED2
STX3
RAE1
UMPS
EIF1B
AK3
NUDT21
RBX1
SRSF6
GMPR2
DCTN4
COX17
CMPK2
BIRC5
TPX2
CENPF
UBE2C
KIF4A
ESPL1
MAD2L1
CDKN3
LMNB1
E2F3
KIF15
UBE2S
NSD2
DBF4
CDKN2C
STAG1
FBXO5
POLQ
SUV39H1
PRIM2
NOLC1
GSPT1
BUB3
SMC1A
ILF3
CDC7
INCENP
KPNB1
JPT1
HUS1
KIF20B
TOP1
PDS5B
SRSF1
STIL
CDC27
BARD1
ATF5
XPO1
SFPQ
CTCF
KNL1
KMT5A
SLC38A1
TENT4A
CUL3
CHMP1A
DKC1
YTHDC1
CCNT1
ATRX
NUP50
SLC7A5
NUMA1
RAD54L
EFNA5
PRPF4B
UCK2
ARID4A
CUL1
UPF1
DR1
SMC2
RBM14
SQLE
CDK4
RASAL2
HOXC10
RPS6KA5
CUL4A
SLC7A1
SS18
TRAIP
PRMT5
CUL5
DDX39A
ORC5
KATNA1
HNRNPD
HIRA
SYNCRIP
TLE3
NCL
HMGN2
SRSF10
SNRPD1
SMARCC1
NOTCH2
TNPO2
SMAD3
MAP3K20
HSPA8
G3BP1
PTTG3P
DMD
MEIS1
SRSF2
NUP98
EWSR1
MTF2
PURA
MEIS2
H2AZ2
ODF2
CASP3
DFFA
CASP7
CFLAR
BIRC3
MCL1
SPTAN1
DIABLO
BIK
SQSTM1
FAS
DAP
BTG3
F2R
CREBBP
RHOB
TSPO
XIAP
CTNNB1
IRF1
HSPB1
ADD1
TIMP2
CASP1
GPX1
IGF2R
AIFM3
PPP3R1
RETSAT
SMAD7
BCL2L10
VDAC2
PLAT
IFNGR1
APP
PSEN2
KRT18
WEE1
RARA
CD14
CD69
PEA15
DNAJC3
CTH
PLCB2
PLPPR4
EBP
ANKH
RHOT2
CYLD
GSTM1
GSR
BCL2L1
GNA15
PPT1
F2
SC5D
IFITM3
RNASEL
SLC20A1
MADD
PPP2R5B
PDCD4
FEZ1
DAP3
DPYD
NEFH
PAK1
FDXR
ETF1
CCNA1
GUCY2D
AVPR1A
CCP110
DCLRE1B
DNMT1
DONSON
EED
GINS4
MMS22L
NAA38
NUP205
WDR90
TRIP13
MSH2
RANBP1
TIMELESS
SPAG5
KIF18B
GINS3
SPC25
DCTPP1
SMC3
RNASEH2A
DEK
DEPDC1
TCF19
RAD1
SMC6
ZW10
PA2G4
NAP1L1
IPO7
BRMS1L
CTPS1
PAICS
LUC7L3
PPM1D
PMS2
ASF1A
EXOSC8
MLH1
NUP107
ORC2
PSIP1
SNRPB
MTHFD2
PRDX4
PHF5A
TBRG4
SHMT1
PRPS1
NUP153
PSMC3IP
RBBP7
NOP56
MXD3
PPP1R8
CDKN2A
AK2
CIT
ING3
POP7
EIF2S1
PAN2
SPC24
COL4A2
COL7A1
COL16A1
NNMT
TFPI2
ITGB5
BMP1
IL32
QSOX1
EDIL3
MAGEE1
SGCB
LAMA2
FSTL3
EMP3
BASP1
COL5A3
SNTB1
[truncated: 436 more rows]
