# Supplementary material for: Identification Of Prognostic Genes Associated With The Tumor Ecosystem In Pancreatic Ductal Adenocarcinoma
Source: Research Square preprint supplement (doi:10.21203/rs.3.rs-8698920/v1), 2026-02-16
Supplement: Supplementary file 5 [file 90a41fe3e1a79bd4196f47ba.xlsx]

## Sheet: 08.correlation_cor
Results of correlations between differential immune cells and prognostic genes
gene	cell	Correlation	Pvalue
KIF23	Activated CD4 T cell	0.312135	2.47259e-05
RACGAP1	Activated CD4 T cell	0.304669	3.93509e-05
CDK1	Activated CD4 T cell	0.267953	0.000323842
MET	Activated CD4 T cell	0.0976888	0.197106
TNFSF10	Activated CD4 T cell	0.227781	0.00236267
LAMA3	Activated CD4 T cell	0.19621	0.00905727
CXCL10	Activated CD4 T cell	0.557277	9.52724e-16
IGFBP2	Activated CD4 T cell	-0.140211	0.0634481
KIF23	Activated CD8 T cell	-0.138895	0.0659973
RACGAP1	Activated CD8 T cell	-0.0862514	0.255027
CDK1	Activated CD8 T cell	-0.163462	0.0301797
MET	Activated CD8 T cell	-0.245818	0.00100719
TNFSF10	Activated CD8 T cell	0.320266	1.46939e-05
LAMA3	Activated CD8 T cell	-0.155045	0.0399088
CXCL10	Activated CD8 T cell	0.534277	2.22866e-14
IGFBP2	Activated CD8 T cell	-0.118081	0.118566
KIF23	Central memory CD4 T cell	-0.105364	0.164004
RACGAP1	Central memory CD4 T cell	-0.169067	0.0248895
CDK1	Central memory CD4 T cell	-0.191145	0.0110465
MET	Central memory CD4 T cell	-0.0961325	0.204371
TNFSF10	Central memory CD4 T cell	0.314209	2.1684e-05
LAMA3	Central memory CD4 T cell	0.0372507	0.623543
CXCL10	Central memory CD4 T cell	0.386524	1.16642e-07
IGFBP2	Central memory CD4 T cell	-0.200326	0.0076814
KIF23	Eosinophil	-0.371607	3.81795e-07
RACGAP1	Eosinophil	-0.311197	2.62298e-05
CDK1	Eosinophil	-0.370779	4.07058e-07
MET	Eosinophil	-0.387154	1.10803e-07
TNFSF10	Eosinophil	-0.0532093	0.483073
LAMA3	Eosinophil	-0.304339	4.01563e-05
CXCL10	Eosinophil	0.111292	0.141424
IGFBP2	Eosinophil	-0.0575281	0.44822
KIF23	MDSC	-0.140379	0.06313
RACGAP1	MDSC	-0.13256	0.0794607
CDK1	MDSC	-0.206965	0.00585067
MET	MDSC	-0.167893	0.0259258
TNFSF10	MDSC	0.324176	1.13794e-05
LAMA3	MDSC	-0.0824015	0.276931
CXCL10	MDSC	0.566786	2.40711e-16
IGFBP2	MDSC	-0.129463	0.0868054
KIF23	Monocyte	-0.425221	4.03834e-09
RACGAP1	Monocyte	-0.312965	2.34631e-05
CDK1	Monocyte	-0.42586	3.80647e-09
MET	Monocyte	-0.345468	2.65453e-06
TNFSF10	Monocyte	0.144206	0.0562007
LAMA3	Monocyte	-0.374656	3.01069e-07
CXCL10	Monocyte	0.123029	0.103797
IGFBP2	Monocyte	-0.0191525	0.800809
KIF23	Plasmacytoid dendritic cell	-0.202914	0.00691441
RACGAP1	Plasmacytoid dendritic cell	-0.215899	0.00400412
CDK1	Plasmacytoid dendritic cell	-0.338952	4.19206e-06
MET	Plasmacytoid dendritic cell	-0.199886	0.00781911
TNFSF10	Plasmacytoid dendritic cell	0.177865	0.0181917
LAMA3	Plasmacytoid dendritic cell	-0.181171	0.0161139
CXCL10	Plasmacytoid dendritic cell	0.299844	5.27822e-05
IGFBP2	Plasmacytoid dendritic cell	-0.0639996	0.398744
KIF23	T follicular helper cell	-0.186696	0.0131012
RACGAP1	T follicular helper cell	-0.183771	0.0146284
CDK1	T follicular helper cell	-0.278677	0.000180254
MET	T follicular helper cell	-0.213445	0.00445033
TNFSF10	T follicular helper cell	0.293949	7.50361e-05
LAMA3	T follicular helper cell	-0.0618468	0.414829
CXCL10	T follicular helper cell	0.538059	1.34913e-14
IGFBP2	T follicular helper cell	-0.137651	0.0684821
KIF23	Type 2 T helper cell	0.343509	3.04877e-06
RACGAP1	Type 2 T helper cell	0.369109	4.63008e-07
CDK1	Type 2 T helper cell	0.322991	1.23002e-05
MET	Type 2 T helper cell	0.305444	3.75202e-05
TNFSF10	Type 2 T helper cell	0.275532	0.000214586
LAMA3	Type 2 T helper cell	0.257257	0.000567305
CXCL10	Type 2 T helper cell	0.357132	1.14139e-06
IGFBP2	Type 2 T helper cell	-0.177466	0.0184572
