# Supplementary material for: Identification Of Prognostic Genes Associated With The Tumor Ecosystem In Pancreatic Ductal Adenocarcinoma
Source: Research Square preprint supplement (doi:10.21203/rs.3.rs-8698920/v1), 2026-02-16
Supplement: Supplementary file 6 [file a6da4a0e64f390552089e4a1.xlsx]

## Sheet: 02.KEGG
Results of KEGG enrichment analysis
ID	Description	pvalue	p.adjust	geneID	Count
hsa04512	ECM-receptor interaction	3.72079e-19	9.93452e-17	LAMC2/LAMB3/LAMA3/ITGA2/FN1/ITGA11/SDC1/ITGA3/ITGB5/THBS2/ITGB1/ITGAV/COL1A2/COL1A1/COMP/COL6A3/COL4A2/ITGA6/ITGB8/LAMB1/COL4A1/SDC4/ITGA5/ITGB3/SPP1/TNC/THBS1	27
hsa04820	Cytoskeleton in muscle cells	4.16059e-18	5.55439e-16	ITGA2/TPM4/COL11A1/FN1/ITGA11/SDC1/ITGA3/ENO2/ITGB5/THBS2/DTNA/VCAN/ITGB1/BGN/COL5A2/FHL2/ITGAV/COL1A2/COL1A1/COL5A1/COMP/TPM2/ENO1/COL3A1/COL6A3/SGCB/COL4A2/ITGA6/FBN1/ITGB8/MYH9/COL4A1/LMNB1/SDC4/ITGA5/ITGB3/DSC2/ANKRD1/DCN/THBS1	40
hsa04510	Focal adhesion	4.01369e-15	3.1204e-13	LAMC2/LAMB3/LAMA3/ITGA2/FN1/ITGA11/ITGA3/MET/ITGB5/THBS2/ITGB1/CTNNB1/ITGAV/PDGFC/COL1A2/COL1A1/COMP/FLNA/PAK1/COL6A3/COL4A2/ITGA6/PDGFRB/MYLK/EGF/ITGB8/BIRC3/LAMB1/COL4A1/ITGA5/ITGB3/SPP1/TNC/THBS1	34
hsa05205	Proteoglycans in cancer	4.67475e-15	3.1204e-13	ITGA2/FN1/SDC1/PLAU/MET/ERBB4/CTTN/ITGB5/WNT5A/ITGB1/EZR/CTNNB1/ITGAV/COL1A2/COL1A1/FLNA/PAK1/PDCD4/MYC/MMP9/PLAUR/LUM/WNT2/MSN/FAS/MMP2/SDC4/GPC3/ITGA5/ITGB3/TGFB2/HIF1A/DCN/THBS1	34
hsa05165	Human papillomavirus infection	5.83379e-14	3.11524e-12	LAMC2/LAMB3/LAMA3/ITGA2/FN1/ITGA11/PKM/ITGA3/PRKCI/ITGB5/THBS2/WNT5A/ITGB1/PSEN1/CTNNB1/ITGAV/COL1A2/EIF2AK2/COL1A1/STAT1/COMP/HLA-C/COL6A3/HLA-B/HLA-A/CCNA2/PTGER4/COL4A2/ITGA6/PDGFRB/EGF/ITGB8/WNT2/LAMB1/COL4A1/FAS/ITGA5/ITGB3/SPP1/TNC/THBS1/PTGS2	42
hsa04151	PI3K-Akt signaling pathway	2.36671e-13	1.05319e-11	LAMC2/LAMB3/LAMA3/ITGA2/FN1/EFNA5/ITGA11/ITGA3/MET/ERBB4/ITGB5/THBS2/F2R/ITGB1/BCL2L1/EPHA2/ITGAV/PDGFC/COL1A2/COL1A1/COMP/COL6A3/MYC/NTRK2/COL4A2/ITGA6/PDGFRB/EGF/ITGB8/EFNA1/ANGPT2/LAMB1/COL4A1/KITLG/OSMR/AREG/ITGA5/ITGB3/EREG/SPP1/TNC/THBS1/IL7R	43
hsa04145	Phagosome	1.65293e-12	6.30473e-11	ITGA2/ITGB5/THBS2/ITGB1/ITGAV/TAP1/COMP/TAP2/HLA-C/HLA-B/HLA-A/TUBB/OLR1/MARCO/MRC1/HLA-DRA/HLA-DQB1/TFRC/CYBB/ITGA5/ITGB3/MSR1/C1R/HLA-DQA1/HLA-DPA1/HLA-DRB1/THBS1	27
hsa05222	Small cell lung cancer	9.60979e-09	3.20727e-07	LAMC2/LAMB3/LAMA3/ITGA2/FN1/ITGA3/ITGB1/BCL2L1/ITGAV/MYC/COL4A2/ITGA6/BIRC3/LAMB1/COL4A1/CKS2/PTGS2	17
hsa05323	Rheumatoid arthritis	1.13799e-08	3.37604e-07	CXCL12/CXCL5/CCL20/CD80/IL18/CTSK/MMP3/MMP1/HLA-DRA/HLA-DQB1/IL1A/TGFB2/HLA-DQA1/HLA-DPA1/CXCL8/HLA-DRB1/CCL2	17
hsa04066	HIF-1 signaling pathway	1.86771e-08	4.93276e-07	SLC2A1/EGLN3/HK2/ENO2/PGK1/HK1/GAPDH/PFKP/LDHA/ENO1/ALDOC/EGF/TIMP1/ANGPT2/TFRC/CYBB/HIF1A/SERPINE1	18
hsa05412	Arrhythmogenic right ventricular cardiomyopathy	2.03222e-08	4.93276e-07	ITGA2/LEF1/ITGA11/ITGA3/ITGB5/DTNA/ITGB1/CTNNB1/ITGAV/SGCB/CDH2/ITGA6/ITGB8/ITGA5/ITGB3/DSC2	16
hsa04640	Hematopoietic cell lineage	2.5621e-08	5.70068e-07	ITGA2/ITGA3/CD55/ANPEP/ITGA6/KITLG/HLA-DRA/HLA-DQB1/IL1A/TFRC/ITGA5/ITGB3/HLA-DQA1/HLA-DPA1/MME/HLA-DRB1/IL7R	17
hsa04940	Type I diabetes mellitus	1.12682e-07	2.31432e-06	CD80/HLA-C/HLA-B/HLA-A/FAS/HLA-DRA/HLA-DQB1/IL1A/HLA-DQA1/HLA-DPA1/HLA-DRB1	11
hsa05332	Graft-versus-host disease	1.458e-07	2.78062e-06	CD80/HLA-C/HLA-B/HLA-A/FAS/HLA-DRA/HLA-DQB1/IL1A/HLA-DQA1/HLA-DPA1/HLA-DRB1	11
hsa04933	AGE-RAGE signaling pathway in diabetic complications	2.13127e-07	3.79367e-06	NOX4/FN1/COL1A2/COL1A1/STAT1/COL3A1/COL4A2/COL4A1/TGFBR1/MMP2/IL1A/CYBB/TGFB2/CXCL8/CCL2/SERPINE1	16
hsa00010	Glycolysis / Gluconeogenesis	2.65333e-07	4.42775e-06	PKM/HK2/ENO2/PGK1/HK1/GAPDH/PFKP/LDHA/PGM2/ENO1/ALDOC/GPI/ADH1B	13
hsa05330	Allograft rejection	3.22837e-07	5.07043e-06	CD80/HLA-C/HLA-B/HLA-A/FAS/HLA-DRA/HLA-DQB1/HLA-DQA1/HLA-DPA1/HLA-DRB1	10
hsa05144	Malaria	5.93139e-07	8.79823e-06	SDC1/MET/THBS2/COMP/IL18/LRP1/TGFB2/CXCL8/HBB/CCL2/THBS1	11
hsa05145	Toxoplasmosis	8.02324e-07	1.12748e-05	LAMC2/LAMB3/LAMA3/ITGB1/BCL2L1/STAT1/ITGA6/BIRC3/ALOX5/LAMB1/HLA-DRA/HLA-DQB1/TGFB2/HLA-DQA1/HLA-DPA1/HLA-DRB1	16
hsa05410	Hypertrophic cardiomyopathy	9.28675e-07	1.23978e-05	ITGA2/TPM4/ITGA11/ITGA3/ITGB5/DTNA/ITGB1/ITGAV/TPM2/SGCB/ITGA6/ITGB8/ITGA5/ITGB3/TGFB2	15
hsa05414	Dilated cardiomyopathy	2.00124e-06	2.54443e-05	ITGA2/TPM4/ITGA11/ITGA3/ITGB5/DTNA/ITGB1/ITGAV/TPM2/SGCB/ITGA6/ITGB8/ITGA5/ITGB3/TGFB2	15
hsa04612	Antigen processing and presentation	2.22576e-06	2.70126e-05	TAP1/CTSB/TAP2/HLA-C/HLA-B/HLA-A/HLA-DRA/HLA-DQB1/IFI30/CD74/HLA-DQA1/HLA-DPA1/HLA-DRB1	13
hsa05416	Viral myocarditis	2.62364e-06	3.0457e-05	CD55/DTNA/CD80/HLA-C/HLA-B/HLA-A/SGCB/HLA-DRA/HLA-DQB1/HLA-DQA1/HLA-DPA1/HLA-DRB1	12
hsa05164	Influenza A	4.69332e-06	5.22132e-05	TMPRSS4/PML/XPO1/EIF2AK2/STAT1/IL18/KPNA2/FAS/HLA-DRA/HLA-DQB1/CXCL10/IL1A/TNFSF10/HLA-DQA1/PRSS2/HLA-DPA1/CXCL8/HLA-DRB1/CCL2	19
hsa04514	Cell adhesion molecules	4.95202e-06	5.28876e-05	SDC1/VCAN/ITGB1/ITGAV/CD80/HLA-C/HLA-B/HLA-A/CDH2/ITGA6/ITGB8/PDCD1LG2/HLA-DRA/SDC4/HLA-DQB1/HLA-DQA1/HLA-DPA1/HLA-DRB1	18
hsa04610	Complement and coagulation cascades	6.66198e-06	6.84134e-05	PLAU/CD55/F2R/PLAT/KLKB1/CLU/PLAUR/TFPI/SERPINA5/C1S/C1R/SERPINB2/SERPINE1	13
hsa05320	Autoimmune thyroid disease	8.51547e-06	8.42085e-05	CD80/HLA-C/HLA-B/HLA-A/FAS/HLA-DRA/HLA-DQB1/HLA-DQA1/HLA-DPA1/HLA-DRB1	10
hsa04810	Regulation of actin cytoskeleton	8.9831e-06	8.56603e-05	ITGA2/FN1/ITGA11/ITGA3/ITGB5/F2R/ITGB1/EZR/CXCL12/ITGAV/PDGFC/PAK1/ITGA6/PDGFRB/MYLK/EGF/ITGB8/MSN/MYH9/ITGA5/ITGB3/NCKAP1L	22
hsa04974	Protein digestion and absorption	1.0036e-05	9.24001e-05	COL10A1/COL11A1/COL8A1/COL12A1/COL5A2/COL1A2/COL1A1/COL5A1/COL3A1/COL6A3/COL4A2/COL4A1/PRSS2/MME	14
hsa04110	Cell cycle	2.12051e-05	0.000186753	SFN/CCNB1/RAD21/BUB1/CCNB2/MCM6/NDC80/CHEK1/MCM4/TRIP13/CDC6/MYC/CCNA2/CDK1/BUB1B/TGFB2/WEE1	17
hsa05230	Central carbon metabolism in cancer	2.1683e-05	0.000186753	SLC2A1/PKM/SLC16A3/MET/HK2/HK1/PFKP/LDHA/MYC/PDGFRB/HIF1A	11
hsa05202	Transcriptional misregulation in cancer	2.48296e-05	0.000207172	RUNX2/IGFBP3/PLAU/MET/PML/RUNX1/ETV1/BCL2L1/PLAT/HHEX/MYC/CCNA2/PPARG/MMP9/ZEB1/MMP3/BIRC3/CXCL8/NR4A3	19
hsa04115	p53 signaling pathway	3.6807e-05	0.000297802	IGFBP3/SFN/CD82/BCL2L1/CCNB1/CCNB2/CHEK1/CDK1/FAS/THBS1/SERPINE1	11
hsa05140	Leishmaniasis	4.72981e-05	0.00037143	ITGB1/STAT1/HLA-DRA/HLA-DQB1/IL1A/CYBB/TGFB2/HLA-DQA1/HLA-DPA1/HLA-DRB1/PTGS2	11
hsa04350	TGF-beta signaling pathway	6.25701e-05	0.00047732	ACVR1/INHBA/GREM1/SKIL/ID1/BMPR2/MYC/FBN1/TGFBR1/TFRC/TGFB2/DCN/THBS1	13
hsa04218	Cellular senescence	7.19895e-05	0.000533922	IGFBP3/CCNB1/CCNB2/CHEK1/HLA-C/HLA-B/HLA-A/MYC/CCNA2/CDK1/GATA4/TGFBR1/IL1A/TGFB2/CXCL8/SERPINE1	16
hsa04657	IL-17 signaling pathway	7.45368e-05	0.000537874	CXCL5/CCL20/MMP9/MMP3/MMP13/MMP1/CXCL10/CXCL8/TNFAIP3/FOSB/CCL2/PTGS2	12
hsa05146	Amoebiasis	0.00016411	0.00114307	LAMC2/LAMB3/LAMA3/FN1/COL1A2/COL1A1/COL3A1/COL4A2/LAMB1/COL4A1/TGFB2/CXCL8	12
hsa04060	Cytokine-cytokine receptor interaction	0.000166966	0.00114307	TNFSF4/ACVR1/INHBA/CXCL12/CXCL5/CCL20/IL18/BMPR2/TNFRSF21/TNFRSF11B/FAS/LIF/TGFBR1/OSMR/CXCL10/IL1A/TNFSF10/CCL18/CXCL14/TGFB2/CXCL8/CCL2/IL7R	23
hsa05166	Human T-cell leukemia virus 1 infection	0.000176259	0.00117653	SLC2A1/BCL2L1/XPO1/CCNB2/CHEK1/HLA-C/HLA-B/HLA-A/MYC/CCNA2/BUB1B/TGFBR1/HLA-DRA/HLA-DQB1/MMP7/TGFB2/HLA-DQA1/HLA-DPA1/HLA-DRB1	19
hsa05321	Inflammatory bowel disease	0.000295034	0.00192132	STAT1/IL18/HLA-DRA/HLA-DQB1/IL1A/TGFB2/HLA-DQA1/HLA-DPA1/HLA-DRB1	9
hsa05219	Bladder cancer	0.000378646	0.0024071	MYC/MMP9/EGF/MMP2/MMP1/CXCL8/THBS1	7
hsa05169	Epstein-Barr virus infection	0.000470545	0.00292176	EIF2AK2/TAP1/STAT1/TAP2/HLA-C/HLA-B/HLA-A/MYC/CCNA2/FAS/HLA-DRA/HLA-DQB1/CXCL10/HLA-DQA1/HLA-DPA1/TNFAIP3/HLA-DRB1	17
hsa04668	TNF signaling pathway	0.000631355	0.00383118	MMP14/CXCL5/CCL20/MMP9/MMP3/BIRC3/FAS/LIF/CXCL10/TNFAIP3/CCL2/PTGS2	12
hsa04015	Rap1 signaling pathway	0.000772083	0.00458102	EFNA5/MET/RALA/PRKCI/F2R/ITGB1/EPHA2/CTNNB1/PDGFC/ID1/PDGFRB/EGF/EFNA1/ANGPT2/KITLG/ITGB3/THBS1	17
hsa05418	Fluid shear stress and atherosclerosis	0.000892372	0.00517964	SDC1/ACVR1/PLAT/CTNNB1/ITGAV/BMPR2/MMP9/TXN/MMP2/SDC4/IL1A/ITGB3/CCL2	13
hsa04672	Intestinal immune network for IgA production	0.00115015	0.00653384	CXCL12/CD80/HLA-DRA/HLA-DQB1/HLA-DQA1/HLA-DPA1/HLA-DRB1	7
hsa05215	Prostate cancer	0.00161417	0.00897883	LEF1/PLAU/PLAT/CTNNB1/PDGFC/MMP9/ZEB1/PDGFRB/EGF/MMP3	10
hsa01200	Carbon metabolism	0.00174523	0.00950974	PKM/HK2/ENO2/PGK1/HK1/GAPDH/PFKP/ACAT1/ENO1/ALDOC/GPI	11
hsa04061	Viral protein interaction with cytokine and cytokine receptor	0.00188104	0.00984781	CXCL12/CXCL5/CCL20/IL18/CXCL10/TNFSF10/CCL18/CXCL14/CXCL8/CCL2	10
hsa05150	Staphylococcus aureus infection	0.00188104	0.00984781	KRT19/KRT14/HLA-DRA/HLA-DQB1/C1S/C1R/HLA-DQA1/HLA-DPA1/HLA-DRB1/KRT18	10
hsa00500	Starch and sucrose metabolism	0.00200143	0.0102766	PYGB/HK2/HK1/PGM2/GPI/PYGL	6
hsa04390	Hippo signaling pathway	0.00237517	0.0119655	LEF1/PRKCI/WNT5A/CTNNB1/ID1/BMPR2/MYC/WNT2/BIRC3/TGFBR1/AREG/TGFB2/SERPINE1	13
hsa05210	Colorectal cancer	0.00248661	0.0122949	LEF1/RALA/CTNNB1/MYC/EGF/TGFBR1/AREG/TGFB2/EREG	9
hsa04010	MAPK signaling pathway	0.00267118	0.0129674	EFNA5/MET/ERBB4/EPHA2/PDGFC/FLNA/PAK1/MYC/NTRK2/PDGFRB/EGF/EFNA1/ANGPT2/FAS/TGFBR1/KITLG/AREG/IL1A/TGFB2/EREG	20
hsa04659	Th17 cell differentiation	0.00332659	0.0158607	RUNX1/AHR/STAT1/TGFBR1/HLA-DRA/HLA-DQB1/HIF1A/HLA-DQA1/HLA-DPA1/HLA-DRB1	10
hsa05310	Asthma	0.00342752	0.0160552	HLA-DRA/HLA-DQB1/HLA-DQA1/HLA-DPA1/HLA-DRB1	5
hsa01230	Biosynthesis of amino acids	0.0035291	0.016246	PKM/ENO2/PGK1/GAPDH/PFKP/ENO1/ALDOC/CTH	8
hsa00052	Galactose metabolism	0.00395264	0.0178874	HK2/GALE/HK1/PFKP/PGM2	5
hsa05206	MicroRNAs in cancer	0.00417342	0.0185717	EFNA5/PLAU/MET/EZR/KIF23/PDCD4/BMPR2/MYC/MMP9/ZEB1/PDGFRB/EFNA1/ITGA5/ITGB3/TGFB2/TP63/TNC/CYP1B1/THBS1/PTGS2	20
hsa04926	Relaxin signaling pathway	0.00426661	0.0186752	COL1A2/ACTA2/COL1A1/COL3A1/MMP9/COL4A2/COL4A1/MMP13/TGFBR1/MMP2/MMP1	11
hsa05417	Lipid and atherosclerosis	0.00611696	0.0263424	BCL2L1/VLDLR/IL18/PPARG/MMP9/XBP1/OLR1/MMP3/FAS/MMP1/ABCA1/TNFSF10/CYBB/CXCL8/CCL2	15
hsa04148	Efferocytosis	0.00622676	0.0263896	SLC2A1/ITGB5/ITGAV/PPARG/PTGER4/ALOX5/LRP1/ABCA1/ITGB3/HIF1A/THBS1/PTGS2	12
hsa01250	Biosynthesis of nucleotide sugars	0.00746491	0.0311427	HK2/GALE/HK1/PGM2/GPI	5
hsa04550	Signaling pathways regulating pluripotency of stem cells	0.00909036	0.0369988	WNT5A/ACVR1/INHBA/CTNNB1/SKIL/ID1/BMPR2/MYC/WNT2/LIF/PAX6	11
hsa05163	Human cytomegalovirus infection	0.00914577	0.0369988	CXCL12/CTNNB1/ITGAV/TAP1/TAP2/HLA-C/HLA-B/HLA-A/MYC/PTGER4/FAS/ITGB3/CXCL8/CCL2/PTGS2	15
hsa04621	NOD-like receptor signaling pathway	0.0111709	0.0445168	ANTXR1/BCL2L1/STAT1/CTSB/IL18/TXN/BIRC3/GBP2/IFI16/CYBB/CXCL8/TNFAIP3/CCL2	13
hsa05170	Human immunodeficiency virus 1 infection	0.0125547	0.0492957	BCL2L1/CCNB1/CCNB2/TAP1/CHEK1/TAP2/PAK1/HLA-C/HLA-B/HLA-A/BST2/CDK1/FAS/WEE1	14
