# Supplementary material for: Identification Of Prognostic Genes Associated With The Tumor Ecosystem In Pancreatic Ductal Adenocarcinoma
Source: Research Square preprint supplement (doi:10.21203/rs.3.rs-8698920/v1), 2026-02-16
Supplement: Supplementary file 7 [file a9094f125dd52d72b3592f7e.xlsx]

## Sheet: file_show (11)
Results of correlation between prognostic genes and drugs
	A.443654	ABT.263	ABT.888	AG.014699	AICAR	AKT.inhibitor.VIII	AMG.706	AP.24534	ATRA	AUY922	AZD.0530	AZD.2281	AZD8055	Axitinib	BI.2536	BIBW2992	BX.795	Bicalutamide	Bleomycin	Bryostatin.1	CCT007093	CEP.701	CGP.082996	CGP.60474	CHIR.99021	CMK	Camptothecin	EHT.1864	Elesclomol	Embelin	Epothilone.B	FH535	FTI.277	GDC.0449	GDC0941	GNF.2	GSK.650394	GSK269962A	GW.441756	Gefitinib	Gemcitabine	JNK.9L	JW.7.52.1	Lapatinib	Lenalidomide	MK.2206	MS.275	Metformin	Methotrexate
KIF23	-0.642*	0.253*	0.237ns	0.148*	-0.291*	-0.231*	0.373ns	0.13*	0.157ns	-0.192*	-0.135*	0.303*	0.301*	0.409*	-0.508*	-0.366*	0.148*	-0.285*	-0.227ns	-0.244ns	0.564ns	0.263*	-0.452*	-0.298*	-0.204ns	-0.502*	0.114ns	0.535ns	0.16ns	-0.219ns	-0.446*	-0.069*	-0.414*	0.189*	0.184*	-0.138*	-0.191*	-0.013*	0.167*	0.213*	-0.222ns	0.11*	-0.412ns	-0.211ns	0.344ns	0.233ns	-0.086ns	0.269*	0.123ns
RACGAP1	-0.57*	0.217*	0.239*	0.224*	-0.278*	-0.19ns	0.32*	0.189*	0.133*	-0.172*	0.06*	0.293*	0.221*	0.412*	-0.386*	-0.244ns	0.226*	-0.25*	-0.184*	-0.105*	0.538*	0.343*	-0.312ns	-0.139*	-0.005*	-0.399ns	0.12*	0.349ns	0.17*	-0.164*	-0.395*	-0.089*	-0.24*	0.226*	0.233*	-0.007*	-0.227ns	0.116*	0.111*	0.208*	-0.253*	0.108*	-0.374ns	-0.141*	0.307ns	0.191ns	-0.058ns	0.142*	0.146ns
CDK1	-0.729*	0.37ns	0.242*	0.252ns	-0.302*	-0.207*	0.35ns	0.329*	0.239*	-0.13*	-0.034*	0.343*	0.414*	0.519*	-0.564*	-0.463ns	0.319ns	-0.265*	-0.114*	-0.262ns	0.688*	0.292*	-0.439ns	-0.256ns	-0.048ns	-0.462*	0.135*	0.418*	0.184*	0.041ns	-0.364*	-0.03*	-0.284*	0.147*	0.26*	-0.158*	-0.133*	0.111*	-0.012*	0.129*	-0.115*	0.209*	-0.539ns	-0.288ns	0.366*	0.317ns	-0.139ns	0.122*	0.125*
MET	-0.562ns	0.338*	0.371*	0.278*	-0.258ns	-0.465*	0.541*	0.147ns	0.378ns	-0.254*	-0.275*	0.519*	0.477*	0.594ns	-0.52ns	-0.439*	0.254ns	-0.534*	-0.264ns	-0.348ns	0.49*	0.423*	-0.289*	-0.188*	-0.378*	-0.47*	0.405*	0.721*	0.237ns	-0.281ns	-0.513*	-0.392*	-0.601ns	0.4*	0.265*	-0.255*	-0.269*	0.146*	0.21*	0.189*	-0.208*	0.125*	-0.353ns	-0.501ns	0.433ns	0.41ns	0.248ns	0.455*	0.207*
TNFSF10	-0.12*	-0.05*	-0.012*	-0.064*	-0.228*	-0.282*	0.25*	-0.19*	-0.119ns	-0.18ns	-0.089*	-0.007ns	0.021*	0.243ns	-0.14*	-0.188*	-0.046ns	-0.048*	-0.204ns	0.011*	0.111*	0.098*	-0.142*	-0.094*	-0.144*	-0.141ns	-0.077*	0.133*	0.294ns	-0.179ns	-0.319ns	-0.152*	-0.089*	-0.049*	-0.143*	-0.126*	-0.184*	0.044*	0.286*	-0.038*	-0.286*	-0.208*	-0.157*	-0.256ns	0.171ns	-0.167*	-0.106*	-0.102*	-0.139ns
LAMA3	-0.412*	0.218*	0.325*	0.197*	-0.23ns	-0.316*	0.481*	0.089*	0.287*	-0.177*	-0.321*	0.428*	0.401*	0.482*	-0.431*	-0.402ns	0.15ns	-0.416*	-0.215*	-0.243*	0.399*	0.33*	-0.225*	-0.161*	-0.362ns	-0.378ns	0.339*	0.69*	0.257*	-0.219*	-0.372*	-0.235*	-0.462*	0.222*	0.151*	-0.226*	-0.102ns	0.094*	0.188*	0.082*	-0.154*	0.098*	-0.218*	-0.415*	0.331ns	0.373*	0.2ns	0.464*	0.143ns
CXCL10	0.018*	-0.268*	-0.048*	-0.293*	-0.333*	-0.013ns	0.019*	-0.397*	-0.336ns	-0.317*	-0.153*	-0.273ns	-0.247*	-0.042ns	0.029*	0.085*	-0.347ns	0.095*	-0.37ns	0.178*	-0.006*	-0.196*	-0.127*	-0.163*	-0.12*	-0.231ns	-0.395ns	0.073*	0.098*	-0.231ns	-0.231*	0.105*	-0.072*	-0.295*	-0.333*	-0.031*	-0.155*	-0.152*	0.344*	-0.027*	-0.446*	-0.282*	-0.028*	0.041ns	-0.048ns	-0.268*	-0.24*	-0.01ns	-0.233ns
IGFBP2	0.095ns	0.049*	-0.026*	0.081ns	0.224*	0.005*	-0.059*	0.179*	0.14*	0.128*	0.082*	-0.017*	0.063ns	-0.021*	0.086ns	0.047ns	-0.007ns	-0.026ns	0.293ns	-0.062*	-0.091*	-0.092*	0.136*	0.071*	0.268ns	0.2ns	0.098ns	-0.228*	-0.073*	0.272*	0.215*	0.074*	0.238*	0.054*	-0.039*	-0.016*	0.188*	0.041*	-0.304*	-0.07*	0.351*	0.14*	0.081*	0.034*	0.003ns	0.079*	-0.087ns	-0.153ns	0.071*
[truncated: 35 more columns]
