# Supplementary material for: Identification Of Prognostic Genes Associated With The Tumor Ecosystem In Pancreatic Ductal Adenocarcinoma
Source: Research Square preprint supplement (doi:10.21203/rs.3.rs-8698920/v1), 2026-02-16
Supplement: Supplementary file 8 [file ccfbd7950cf94b2ffbcc1e43.xlsx]

## Sheet: 02.GO
Results of GO enrichment analysis
ONTOLOGY	ID	Description	pvalue	p.adjust	geneID	Count
CC	GO:0062023	collagen-containing extracellular matrix	9.60463e-53	3.86106e-50	LAMC2/LAMB3/LAMA3/COL10A1/LGALS3/COL11A1/FN1/SULF1/POSTN/EFNA5/PKM/SEMA7A/CTHRC1/ANXA2/EDIL3/THBS2/COL8A1/WNT5A/VCAN/TGM2/LOXL2/COL12A1/ECM1/AEBP1/GREM1/BGN/CXCL12/MATN3/COL5A2/COL1A2/ACTA2/CLU/COL1A1/COL5A1/COMP/APLP1/CTSB/TGFBI/MXRA5/LOXL1/TINAGL1/COL3A1/COL6A3/ASPN/TIMP2/SRPX2/MMP9/LRRC15/LGALS1/SPARC/CDH2/COL4A2/LUM/FBN1/TIMP1/IGFBP7/WNT2/SERPINH1/ANGPT2/ANXA1/SFRP2/LAMB1/COL4A1/HTRA1/DST/MMP…	82
BP	GO:0030198	extracellular matrix organization	2.71561e-37	7.49589e-34	LAMB3/COL10A1/COL11A1/FERMT1/ANTXR1/SULF1/POSTN/ANXA2/MMP14/MMP11/P4HA1/COL8A1/RUNX1/ITGB1/LOXL2/COL12A1/AEBP1/GREM1/FAP/MMP12/MATN3/COL5A2/COL1A2/COL1A1/HPN/COL5A1/COMP/APLP1/TGFBI/LOXL1/COL3A1/COLGALT1/MMP9/CTSK/COL4A2/BMP1/OLFML2B/LUM/PDPN/SERPINH1/MMP3/PRDX4/TNFRSF11B/SFRP2/LAMB1/COL4A1/MMP13/TGFBR1/MMP2/MMP1/LRP1/LOX/DPT/MMP7/ITGB3/DDR2/TGFB2/ELF3/PRSS2/CYP1B1	60
BP	GO:0043062	extracellular structure organization	3.27809e-37	7.49589e-34	LAMB3/COL10A1/COL11A1/FERMT1/ANTXR1/SULF1/POSTN/ANXA2/MMP14/MMP11/P4HA1/COL8A1/RUNX1/ITGB1/LOXL2/COL12A1/AEBP1/GREM1/FAP/MMP12/MATN3/COL5A2/COL1A2/COL1A1/HPN/COL5A1/COMP/APLP1/TGFBI/LOXL1/COL3A1/COLGALT1/MMP9/CTSK/COL4A2/BMP1/OLFML2B/LUM/PDPN/SERPINH1/MMP3/PRDX4/TNFRSF11B/SFRP2/LAMB1/COL4A1/MMP13/TGFBR1/MMP2/MMP1/LRP1/LOX/DPT/MMP7/ITGB3/DDR2/TGFB2/ELF3/PRSS2/CYP1B1	60
BP	GO:0045229	external encapsulating structure organization	4.76636e-37	7.49589e-34	LAMB3/COL10A1/COL11A1/FERMT1/ANTXR1/SULF1/POSTN/ANXA2/MMP14/MMP11/P4HA1/COL8A1/RUNX1/ITGB1/LOXL2/COL12A1/AEBP1/GREM1/FAP/MMP12/MATN3/COL5A2/COL1A2/COL1A1/HPN/COL5A1/COMP/APLP1/TGFBI/LOXL1/COL3A1/COLGALT1/MMP9/CTSK/COL4A2/BMP1/OLFML2B/LUM/PDPN/SERPINH1/MMP3/PRDX4/TNFRSF11B/SFRP2/LAMB1/COL4A1/MMP13/TGFBR1/MMP2/MMP1/LRP1/LOX/DPT/MMP7/ITGB3/DDR2/TGFB2/ELF3/PRSS2/CYP1B1	60
MF	GO:0005201	extracellular matrix structural constituent	1.18964e-31	8.03006e-29	LAMC2/LAMB3/LAMA3/COL10A1/COL11A1/FN1/POSTN/CTHRC1/EDIL3/THBS2/COL8A1/VCAN/COL12A1/ECM1/AEBP1/BGN/MATN3/COL5A2/COL1A2/COL1A1/COL5A1/COMP/TGFBI/MXRA5/TINAGL1/COL3A1/COL6A3/ASPN/SRPX2/SPARC/COL4A2/LUM/FBN1/TFPI2/IGFBP7/LAMB1/COL4A1/MFAP5/DPT/DCN/TNC/MMRN1/THBS1	43
BP	GO:0030199	collagen fibril organization	3.7169e-26	4.38409e-23	COL11A1/ANXA2/MMP11/P4HA1/LOXL2/COL12A1/AEBP1/GREM1/COL5A2/COL1A2/COL1A1/COL5A1/COMP/LOXL1/COL3A1/COLGALT1/BMP1/LUM/SERPINH1/SFRP2/TGFBR1/LOX/DPT/DDR2/TGFB2/CYP1B1	26
BP	GO:0042060	wound healing	1.36496e-25	1.28798e-22	ITGA2/FERMT1/FN1/SDC1/PLAU/ANXA2/DCBLD2/CLIC1/F2R/WNT5A/CEACAM1/ITGB1/PLAT/KLKB1/FAP/MMP12/ACTA2/COL1A1/COL5A1/COMP/FLNA/PAK1/COL3A1/PPARG/AQP1/PTK7/PLAUR/XBP1/PDGFRB/PDPN/MYLK/TIMP1/TFPI2/ALOX5/MYH9/ANXA1/GATA4/DST/TGFBR1/APOH/TFPI/LOX/SDC4/IL1A/ITGA5/ITGB3/DDR2/TGFB2/HIF1A/SERPINB2/EREG/TNFAIP3/HBB/MMRN1/THBS1/SERPINE1	56
BP	GO:0050673	epithelial cell proliferation	9.52839e-24	7.49249e-21	FERMT1/SULF1/RUNX2/IGFBP3/SFN/MMP14/EFNB2/COL8A1/WNT5A/CEACAM1/PROX1/LOXL2/BCL2L1/ECM1/PSEN1/IGFBP5/EPHA2/FAP/CXCL12/MMP12/CTNNB1/HPN/STAT1/ID1/BRCA2/NFIB/BMPR2/MYC/PPARG/ZEB1/SPARC/XBP1/EGF/WNT2/ALOX5/LGR5/ROBO1/SFRP2/LAMB1/HTRA1/TGFBR1/APOH/TGFBR3/GPC3/AREG/ITGB3/TGFB2/PAX6/HIF1A/TP63/EREG/TNFAIP3/CCL2/SFRP1/THBS1/NR4A3	56
MF	GO:0005178	integrin binding	4.03235e-22	1.151e-19	LAMA3/ITGA2/FERMT1/FN1/ITGA11/SEMA7A/ITGA3/ESM1/MMP14/EDIL3/ITGB5/ITGB1/FAP/CXCL12/ITGAV/COL5A1/COMP/TGFBI/COL3A1/ITGA6/ITGBL1/FBN1/ITGB8/MYH9/SFRP2/LAMB1/DST/THY1/ITGA5/ITGB3/CDH17/SPP1/THBS1	33
MF	GO:0005518	collagen binding	5.11554e-22	1.151e-19	ITGA2/ANTXR1/FN1/ITGA11/ITGA3/ITGB1/AEBP1/MMP12/COMP/CTSB/TGFBI/PAK1/ASPN/MMP9/CTSK/LRRC15/SPARC/LUM/SERPINH1/MMP13/LOX/DDR2/DCN/THBS1	24
BP	GO:0001704	formation of primary germ layer	4.66244e-22	3.14249e-19	LAMB3/LAMA3/ITGA2/COL11A1/FN1/LEF1/ITGA3/MMP14/ITGB5/COL8A1/WNT5A/ITGB1/ACVR1/COL12A1/INHBA/EPHA2/CTNNB1/COL5A2/ITGAV/COL5A1/DKK1/BMPR2/MMP9/COL4A2/GPI/SFRP2/LAMB1/MMP2/ITGA5/ITGB3	30
BP	GO:0001503	ossification	2.71909e-21	1.50558e-18	TPM4/COL11A1/LEF1/RUNX2/ITGA11/IGFBP3/SEMA7A/CTHRC1/CDH11/MMP14/CLIC1/WNT5A/RUNX1/VCAN/ACVR1/ECM1/GREM1/IGFBP5/EPHA2/CTNNB1/COL5A2/FHL2/COL1A2/COL1A1/COMP/DKK1/ASPN/BMPR2/PPARG/MMP9/CTSK/PTGER4/BMP1/ALOX5/TNFAIP6/SFRP2/IFITM1/MMP13/MMP2/LOX/GPC3/AREG/DDR2/TGFB2/HIF1A/TP63/SPP1/TNC/SFRP1/PTGS2	50
BP	GO:0045785	positive regulation of cell adhesion	2.87202e-21	1.50558e-18	ITGA2/FERMT1/FN1/LEF1/AGR2/ITGA3/CD55/EDIL3/EFNB2/TNFSF4/COL8A1/WNT5A/RUNX1/TGM2/CXCL12/ITGAV/CD80/FLNA/IL18/HLA-A/LGALS1/PLAUR/XBP1/PDPN/PDCD1LG2/ALOX5/ANXA1/IGFBP2/SFRP2/LAMB1/LIF/THY1/KITLG/HLA-DRA/SDC4/HLA-DQB1/IL1A/TFRC/CD74/ITGA5/ITGB3/TGFB2/HLA-DQA1/PRSS2/HLA-DPA1/HLA-DRB1/NCKAP1L/CCL2/MMRN1/SFRP1/VNN1/IL7R/NR4A3	53
BP	GO:0001667	ameboidal-type cell migration	6.10479e-21	2.88024e-18	ITGA2/FERMT1/FN1/SEMA7A/ITGA3/MET/EDNRA/ANLN/EFNB2/PML/ERBB4/WNT5A/CEACAM1/ITGB1/PROX1/LOXL2/ACVR1/GREM1/EPHA2/FAP/ACTA2/ID1/SRPX2/BMPR2/PPARG/MMP9/AQP1/SPARC/CDH2/GPI/CORO1C/EGF/TIMP1/EFNA1/ANGPT2/MYH9/ANXA1/ROBO1/TGFBR1/RAB25/KITLG/FSTL1/APOH/SDC4/GPC3/ITGB3/DDR2/TGFB2/HIF1A/DCN/CYP1B1/THBS1/PTGS2	53
BP	GO:0061448	connective tissue development	9.0441e-21	3.8791e-18	COL11A1/SULF1/RUNX2/WNT5A/RUNX1/RASAL2/LOXL2/ECM1/ACAT1/GREM1/BGN/CTNNB1/MATN3/CRIP1/KLF7/ACTA2/COL1A1/COL5A1/COMP/TGFBI/COL3A1/NFIB/BMPR2/PPARG/CTSK/ZEB1/XBP1/BMP1/PDGFRB/TIMP1/ITGB8/SERPINH1/TYMS/SFRP2/PRRX1/MMP13/TGFBR1/LOX/ITGB3/HIF1A	40
BP	GO:1901342	regulation of vasculature development	1.03506e-20	4.06953e-18	SULF1/PKM/HK2/PGK1/PML/THBS2/WNT5A/CEACAM1/RUNX1/ITGB1/ECM1/GREM1/EPHA2/HHEX/CTNNB1/STAT1/ID1/PPARG/AQP1/SPARC/XBP1/COL4A2/ITGB8/EFNA1/ANGPT2/ALOX5/GATA4/SFRP2/APOH/ADAM12/CXCL10/IL1A/CYBB/ITGA5/ITGB3/TGFB2/HIF1A/DCN/CXCL8/ADM/TNFAIP3/SFRP1/CYP1B1/THBS1/SERPINE1	45
BP	GO:0045765	regulation of angiogenesis	3.53989e-20	1.28471e-17	SULF1/PKM/HK2/PGK1/PML/THBS2/WNT5A/CEACAM1/RUNX1/ITGB1/ECM1/GREM1/EPHA2/HHEX/CTNNB1/STAT1/PPARG/AQP1/SPARC/XBP1/COL4A2/ITGB8/EFNA1/ANGPT2/ALOX5/GATA4/SFRP2/APOH/ADAM12/CXCL10/IL1A/CYBB/ITGA5/ITGB3/TGFB2/HIF1A/DCN/CXCL8/ADM/TNFAIP3/SFRP1/CYP1B1/THBS1/SERPINE1	44
BP	GO:0033627	cell adhesion mediated by integrin	1.75295e-19	5.90745e-17	ITGA2/FERMT1/ITGA11/PLAU/ITGA3/ITGB5/ITGB1/EPHA2/ITGAV/ITGA6/ITGBL1/FBN1/ITGB8/EFNA1/SFRP2/LIF/MUC1/ITGA5/ITGB3/TGFB2/NCKAP1L/MMRN1/CYP1B1/SERPINE1	24
BP	GO:0007369	gastrulation	2.87796e-19	9.05215e-17	LAMB3/LAMA3/ITGA2/COL11A1/FN1/LEF1/ITGA3/MMP14/ITGB5/COL8A1/WNT5A/ITGB1/ACVR1/COL12A1/INHBA/EPHA2/CTNNB1/COL5A2/ITGAV/COL5A1/DKK1/BMPR2/MMP9/COL4A2/GPI/SFRP2/LAMB1/MMP2/GPC3/ITGA5/ITGB3/SFRP1/NR4A3	33
BP	GO:0070482	response to oxygen levels	4.10013e-19	1.20902e-16	SLC2A1/ITGA2/PLAU/EGLN3/MMP14/EDNRA/HK2/PGK1/PML/LOXL2/PLAT/AK4/CXCL12/COL1A1/ENO1/MYC/CCNA2/BRIP1/PPARG/AQP1/BNIP3/PDGFRB/PDPN/ANGPT2/CA9/FAS/HILPDA/PLOD2/MMP2/NDRG1/TGFBR3/IL1A/TFRC/CYBB/DDR2/TGFB2/HIF1A/ADM/SFRP1/THBS1/PTGS2/NR4A2	42
BP	GO:0035987	endodermal cell differentiation	5.55998e-19	1.54306e-16	LAMB3/LAMA3/COL11A1/FN1/MMP14/ITGB5/COL8A1/COL12A1/INHBA/CTNNB1/COL5A2/ITGAV/COL5A1/DKK1/MMP9/COL4A2/LAMB1/MMP2/ITGA5	19
CC	GO:0030055	cell-substrate junction	7.96563e-19	1.60109e-16	LAMA3/ITGA2/TPM4/NOX4/FERMT1/ITGA11/PLAU/ITGA3/MMP14/EFNB2/RALA/CTTN/ITGB5/PPFIBP1/ITGB1/TGM2/EZR/KIF23/EPHA2/TES/FAP/CTNNB1/FHL2/ITGAV/FLNA/PAK1/PTK7/PLAUR/CDH2/ITGA6/PDGFRB/CORO1C/ITGBL1/ITGB8/MSN/MYH9/ANXA1/DST/THY1/LRP1/SDC4/ITGA5/ITGB3/DDR2/MME/TNC	46
CC	GO:0005925	focal adhesion	1.84655e-18	2.47438e-16	ITGA2/TPM4/NOX4/FERMT1/ITGA11/PLAU/ITGA3/MMP14/EFNB2/RALA/CTTN/ITGB5/PPFIBP1/ITGB1/TGM2/EZR/KIF23/EPHA2/TES/FAP/CTNNB1/FHL2/ITGAV/FLNA/PAK1/PTK7/PLAUR/CDH2/ITGA6/PDGFRB/CORO1C/ITGBL1/ITGB8/MSN/MYH9/ANXA1/DST/THY1/LRP1/SDC4/ITGA5/ITGB3/DDR2/MME/TNC	45
BP	GO:0032963	collagen metabolic process	1.84913e-18	4.84678e-16	ITGA2/MMP14/MMP11/F2R/RUNX1/ITGB1/INHBA/FAP/MMP12/COL1A2/COL1A1/COL5A1/CTSB/MMP9/CTSK/PDGFRB/SERPINH1/MMP3/MMP13/MMP2/MMP1/MMP7/DDR2/HIF1A/PRSS2	25
CC	GO:0005788	endoplasmic reticulum lumen	1.1015e-17	1.10701e-15	COL10A1/COL11A1/FN1/IGFBP3/P4HA1/COL8A1/WNT5A/VCAN/COL12A1/IGFBP5/CALU/MATN3/COL5A2/PDGFC/COL1A2/CLU/COL1A1/COL5A1/COL3A1/COL6A3/COLGALT1/LGALS1/PLAUR/CDH2/COL4A2/CP/FBN1/TIMP1/IGFBP7/SERPINH1/LAMB1/COL4A1/FSTL1/GPC3/SPP1/TNC/THBS1/PTGS2	38
BP	GO:0050678	regulation of epithelial cell proliferation	4.71229e-18	1.17014e-15	SULF1/RUNX2/SFN/EFNB2/WNT5A/CEACAM1/PROX1/ECM1/CXCL12/MMP12/CTNNB1/HPN/STAT1/ID1/BRCA2/NFIB/BMPR2/MYC/PPARG/ZEB1/SPARC/XBP1/EGF/WNT2/ALOX5/ROBO1/SFRP2/LAMB1/HTRA1/TGFBR1/APOH/TGFBR3/GPC3/AREG/ITGB3/TGFB2/PAX6/HIF1A/TP63/EREG/TNFAIP3/CCL2/SFRP1/THBS1/NR4A3	45
BP	GO:0001666	response to hypoxia	7.85311e-18	1.85255e-15	SLC2A1/ITGA2/PLAU/EGLN3/MMP14/EDNRA/HK2/PGK1/PML/LOXL2/PLAT/AK4/CXCL12/ENO1/MYC/CCNA2/BRIP1/PPARG/AQP1/BNIP3/ANGPT2/CA9/HILPDA/PLOD2/MMP2/NDRG1/TGFBR3/IL1A/TFRC/CYBB/DDR2/TGFB2/HIF1A/ADM/SFRP1/THBS1/PTGS2/NR4A2	38
CC	GO:0098636	protein complex involved in cell adhesion	2.38575e-17	1.91814e-15	ITGA2/ITGA11/PLAU/ITGA3/ITGB5/ITGB1/ITGAV/CD80/LGALS1/PLAUR/ITGA6/ITGBL1/ITGB8/LAMB1/ITGA5/ITGB3/TNC/MMRN1	18
BP	GO:0048771	tissue remodeling	1.45149e-17	3.261e-15	NOX4/CTHRC1/MMP14/EDNRA/F2R/CEACAM1/RUNX1/PDK4/GREM1/IGFBP5/EPHA2/CTNNB1/FLNA/IL18/BMPR2/PPARG/CTSK/TIMP1/TNFRSF11B/LIF/MMP2/IL1A/TFRC/ITGB3/DDR2/HIF1A/ELF3/TNFAIP3/SPP1/SFRP1	30
BP	GO:0001706	endoderm formation	2.3076e-17	4.94876e-15	LAMB3/LAMA3/COL11A1/FN1/MMP14/ITGB5/COL8A1/COL12A1/INHBA/CTNNB1/COL5A2/ITGAV/COL5A1/DKK1/MMP9/COL4A2/LAMB1/MMP2/ITGA5	19
BP	GO:0036293	response to decreased oxygen levels	3.41229e-17	6.99964e-15	SLC2A1/ITGA2/PLAU/EGLN3/MMP14/EDNRA/HK2/PGK1/PML/LOXL2/PLAT/AK4/CXCL12/ENO1/MYC/CCNA2/BRIP1/PPARG/AQP1/BNIP3/ANGPT2/CA9/HILPDA/PLOD2/MMP2/NDRG1/TGFBR3/IL1A/TFRC/CYBB/DDR2/TGFB2/HIF1A/ADM/SFRP1/THBS1/PTGS2/NR4A2	38
BP	GO:0031589	cell-substrate adhesion	7.11293e-17	1.39828e-14	LAMB3/ITGA2/FERMT1/ANTXR1/FN1/EFNA5/ITGA11/PLAU/AGR2/ITGA3/MMP14/EDIL3/SPOCK1/CTTN/ITGB5/COL8A1/ITGB1/GREM1/MMP12/CTNNB1/ITGAV/COL1A1/FLNA/ID1/COL3A1/KIF14/ITGA6/PDPN/CORO1C/ITGBL1/ITGB8/EFNA1/ANGPT2/LAMB1/THY1/SDC4/ITGA5/ITGB3/SFRP1/THBS1/SERPINE1	41
CC	GO:0005604	basement membrane	2.66233e-16	1.78376e-14	LAMC2/LAMB3/LAMA3/FN1/EFNA5/ANXA2/THBS2/COL8A1/LOXL2/ACTA2/COL5A1/APLP1/TGFBI/LOXL1/SPARC/COL4A2/FBN1/TIMP1/LAMB1/COL4A1/DST/TNC	22
BP	GO:0007229	integrin-mediated signaling pathway	9.52865e-17	1.79825e-14	LAMA3/ITGA2/FERMT1/FN1/ITGA11/SEMA7A/ITGA3/ITGB5/CEACAM1/ITGB1/ITGAV/FLNA/COL3A1/ITGA6/ITGBL1/TIMP1/ITGB8/MYH9/LAMB1/DST/THY1/ITGA5/ITGB3/CDH17	24
BP	GO:0090130	tissue migration	1.1484e-16	2.0839e-14	ITGA2/FERMT1/ITGA3/MET/ANLN/EFNB2/WNT5A/CEACAM1/ITGB1/PROX1/LOXL2/GREM1/EPHA2/FAP/ACTA2/ID1/SRPX2/BMPR2/PPARG/MMP9/SPARC/GPI/CORO1C/EGF/EFNA1/ANGPT2/MYH9/ANXA1/ROBO1/TGFBR1/RAB25/KITLG/FSTL1/APOH/ITGB3/TGFB2/HIF1A/DCN/CYP1B1/THBS1/PTGS2	41
BP	GO:0048732	gland development	2.82713e-16	4.94015e-14	ITGA2/SULF1/LEF1/MET/EDNRA/HK2/PML/ERBB4/WNT5A/CEACAM1/PROX1/TGM2/ACAT1/PSEN1/IGFBP5/EPHA2/CTNNB1/CIT/CRIP1/CCNB2/HPN/E2F7/BRCA2/NFIB/XBP1/EGF/WNT2/TYMS/MSN/ANXA1/ROBO1/TGFBR1/MMP2/TGFBR3/AREG/TGFB2/PAX6/HIF1A/ELF3/TP63/TNFAIP3/TNC/SFRP1/CYP1B1	44
BP	GO:0010631	epithelial cell migration	3.07275e-16	5.17759e-14	ITGA2/FERMT1/ITGA3/MET/ANLN/EFNB2/WNT5A/CEACAM1/ITGB1/PROX1/LOXL2/GREM1/EPHA2/FAP/ID1/SRPX2/BMPR2/PPARG/MMP9/SPARC/GPI/CORO1C/EGF/EFNA1/ANGPT2/MYH9/ANXA1/ROBO1/TGFBR1/RAB25/KITLG/FSTL1/APOH/ITGB3/TGFB2/HIF1A/DCN/CYP1B1/THBS1/PTGS2	40
BP	GO:0090132	epithelium migration	4.07463e-16	6.62901e-14	ITGA2/FERMT1/ITGA3/MET/ANLN/EFNB2/WNT5A/CEACAM1/ITGB1/PROX1/LOXL2/GREM1/EPHA2/FAP/ID1/SRPX2/BMPR2/PPARG/MMP9/SPARC/GPI/CORO1C/EGF/EFNA1/ANGPT2/MYH9/ANXA1/ROBO1/TGFBR1/RAB25/KITLG/FSTL1/APOH/ITGB3/TGFB2/HIF1A/DCN/CYP1B1/THBS1/PTGS2	40
MF	GO:0050840	extracellular matrix binding	3.98065e-16	6.71735e-14	ITGA2/LGALS3/COL11A1/ITGA3/ITGB1/ECM1/BGN/ITGAV/TGFBI/TINAGL1/LRRC15/LGALS1/SPARC/OLFML2B/ITGB3/DCN/SPP1/THBS1	18
BP	GO:0001655	urogenital system development	9.89976e-16	1.5569e-13	SULF1/SDC1/ITGA3/EDNRA/EFNB2/ERBB4/WNT5A/CENPF/PROX1/ACVR1/ACAT1/GREM1/CTNNB1/CRIP1/ACTA2/STAT1/PRDM1/MYC/MMP9/AQP1/PTK7/PDGFRB/FBN1/ANGPT2/LGR5/ANXA1/COL4A1/LIF/TGFBR1/MMP2/SDC4/GPC3/ITGB3/TGFB2/TP63/MME/TNC/SFRP1/EPCAM	39
BP	GO:0048144	fibroblast proliferation	1.63255e-15	2.48464e-13	FN1/PML/WNT5A/CCNB1/CTNNB1/PDGFC/COL3A1/CDC6/MYC/CCNA2/AQP1/PDGFRB/CDK1/WNT2/LIF/CKS2/IFI30/CD74/ITGB3/DDR2/EREG/SFRP1	22
BP	GO:0060485	mesenchyme development	2.02712e-15	2.98874e-13	FN1/LEF1/SEMA7A/EDNRA/ERBB4/WNT5A/LOXL2/ACVR1/GREM1/CTNNB1/FAM83D/ACTA2/COL1A1/HPN/STAT1/FLNA/PDCD4/BMPR2/MYC/PTK7/CDH2/PDGFRB/PDPN/CORO1C/WNT2/EFNA1/ROBO1/GATA4/SFRP2/TGFBR1/KITLG/S100A4/TGFBR3/TGFB2/HIF1A/SFRP1	36
BP	GO:0007492	endoderm development	2.64762e-15	3.76221e-13	LAMB3/LAMA3/COL11A1/FN1/MMP14/ITGB5/COL8A1/COL12A1/INHBA/CTNNB1/COL5A2/ITGAV/COL5A1/DKK1/MMP9/COL4A2/GATA4/LAMB1/MMP2/ITGA5	20
BP	GO:0007178	transmembrane receptor protein serine/threonine kinase signaling pathway	2.71121e-15	3.76221e-13	FERMT1/SULF1/LEF1/RUNX2/ITGA3/PML/ITGB5/WNT5A/ACVR1/INHBA/GREM1/PMEPA1/COL1A2/COMP/DKK1/HTRA3/SKIL/PDCD4/ID1/COL3A1/ASPN/BMPR2/PPARG/ZEB1/FBN1/ITGB8/TNFAIP6/GATA4/SFRP2/HTRA1/TGFBR1/LRP1/FSTL1/LOX/TGFBR3/GPC3/SFRP4/TGFB2/SFRP1/THBS1	40
BP	GO:0051216	cartilage development	3.12347e-15	4.21044e-13	COL11A1/SULF1/RUNX2/WNT5A/RUNX1/LOXL2/ECM1/GREM1/BGN/CTNNB1/MATN3/COL1A1/COMP/TGFBI/COL3A1/NFIB/BMPR2/CTSK/ZEB1/BMP1/TIMP1/ITGB8/SERPINH1/TYMS/SFRP2/PRRX1/MMP13/TGFBR1/HIF1A	29
BP	GO:0007159	leukocyte cell-cell adhesion	4.01478e-15	5.2616e-13	LGALS3/LEF1/CD55/EFNB2/TNFSF4/CEACAM1/RUNX1/ITGB1/EZR/NT5E/CXCL12/CD80/IL18/HLA-A/LGALS1/XBP1/TNFRSF21/OLR1/PDCD1LG2/MSN/ALOX5/ANXA1/IGFBP2/THY1/IDO1/KITLG/HLA-DRA/SDC4/HLA-DQB1/IL1A/TFRC/CD74/ITGA5/HLA-DQA1/HLA-DPA1/HLA-DRB1/NCKAP1L/CCL2/VNN1/IL7R/NR4A3	41
BP	GO:0009612	response to mechanical stimulus	1.14787e-14	1.46369e-12	SLC2A1/ITGA2/COL11A1/MMP14/BTG2/ETV1/CXCL12/CTNNB1/COL1A1/HPN/STAT1/CHEK1/PTGER4/AQP1/CDH2/GPI/BNIP3/ANGPT2/IGFBP2/GATA4/FAS/MMP2/CXCL10/ITGB3/DDR2/ANKRD1/FOSB/THBS1/PTGS2	29
BP	GO:0002683	negative regulation of immune system process	1.33693e-14	1.6599e-12	LGALS3/CD55/TNFSF4/CEACAM1/RUNX1/EZR/INHBA/GREM1/CXCL12/MMP12/CTNNB1/AHR/CD80/COL3A1/HLA-B/HLA-A/MYC/PPARG/PTGER4/BST2/TNFRSF21/FBN1/NMI/PDCD1LG2/TNFRSF11B/TNFAIP6/ANXA1/THY1/IFI16/IDO1/KITLG/CD68/SDC4/CD74/TGFB2/TNFAIP3/HLA-DRB1/NCKAP1L/CCL2/SFRP1/THBS1/IL7R	42
BP	GO:0048146	positive regulation of fibroblast proliferation	3.43802e-14	4.15913e-12	FN1/PML/WNT5A/CCNB1/PDGFC/CDC6/MYC/CCNA2/AQP1/PDGFRB/WNT2/LIF/CD74/ITGB3/DDR2/EREG	16
BP	GO:0050878	regulation of body fluid levels	7.17571e-14	8.46375e-12	ITGA2/FN1/PLAU/AGR2/SFN/ANXA2/MET/HK2/ERBB4/CLIC1/F2R/CEACAM1/PLAT/KLKB1/FAP/COMP/FLNA/COL3A1/IL18/AQP1/PLAUR/XBP1/GPI/PDPN/TFPI2/MYH9/APOH/TFPI/ITGB3/HIF1A/SERPINB2/TP63/CFTR/ADM/HBB/MMRN1/THBS1/SERPINE1	38
BP	GO:0022612	gland morphogenesis	8.04947e-14	9.26278e-12	SULF1/PML/WNT5A/CEACAM1/PROX1/TGM2/IGFBP5/EPHA2/CRIP1/HPN/NFIB/XBP1/MSN/MMP2/AREG/TGFB2/PAX6/ELF3/TP63/TNFAIP3/TNC/SFRP1	22
BP	GO:0061041	regulation of wound healing	8.92936e-14	1.00306e-11	FERMT1/PLAU/ANXA2/F2R/CEACAM1/ITGB1/PLAT/KLKB1/FAP/ACTA2/PLAUR/XBP1/MYLK/ALOX5/ANXA1/APOH/TFPI/DDR2/SERPINB2/TNFAIP3/MMRN1/THBS1/SERPINE1	23
BP	GO:0048145	regulation of fibroblast proliferation	9.19103e-14	1.00845e-11	FN1/PML/WNT5A/CCNB1/CTNNB1/PDGFC/CDC6/MYC/CCNA2/AQP1/PDGFRB/WNT2/LIF/IFI30/CD74/ITGB3/DDR2/EREG/SFRP1	19
BP	GO:0030509	BMP signaling pathway	1.11738e-13	1.19814e-11	SULF1/LEF1/RUNX2/ITGA3/WNT5A/ACVR1/GREM1/COMP/DKK1/HTRA3/SKIL/PDCD4/BMPR2/PPARG/FBN1/TNFAIP6/GATA4/SFRP2/HTRA1/FSTL1/TGFBR3/GPC3/SFRP4/TGFB2/SFRP1	25
MF	GO:0001968	fibronectin binding	9.29621e-14	1.25499e-11	IGFBP3/ITGA3/ITGB1/IGFBP5/ITGAV/CTSK/LRRC15/TNFAIP6/SFRP2/MMP2/SDC4/ITGB3/THBS1	13
BP	GO:0052547	regulation of peptidase activity	1.31885e-13	1.38274e-11	ANTXR1/FN1/EGLN3/SFN/ANXA2/SPOCK1/PML/F2R/GAPDH/ECM1/ARL6IP1/CTSB/COL6A3/TIMP2/MYC/PPARG/MMP9/BST2/AQP1/PLAUR/GPI/TIMP1/TFPI2/SERPINH1/EFNA1/BIRC3/ROBO1/SFRP2/FAS/IFI16/LRP1/TFPI/GPC3/SERPINA5/TNFSF10/RARRES1/SERPINB2/TP63/THBS1/PTGS2/SERPINE1	41
CC	GO:0098644	complex of collagen trimers	3.0669e-13	1.76128e-11	COL10A1/COL11A1/COL8A1/COL5A2/COL1A2/COL1A1/COL5A1/COL3A1/COL4A2/LUM/COL4A1	11
BP	GO:1903034	regulation of response to wounding	2.22577e-13	2.28287e-11	FERMT1/PLAU/ANXA2/F2R/CEACAM1/ITGB1/PLAT/KLKB1/FAP/ACTA2/FLNA/PLAUR/XBP1/MYLK/ALOX5/ANXA1/APOH/TFPI/DDR2/SERPINB2/TNFAIP3/SPP1/MMRN1/THBS1/SERPINE1	25
BP	GO:0031639	plasminogen activation	2.54838e-13	2.55814e-11	PLAU/ANXA2/PGK1/RUNX1/PLAT/KLKB1/HPN/ENO1/PLAUR/APOH/THBS1/SERPINE1	12
BP	GO:0050680	negative regulation of epithelial cell proliferation	3.79477e-13	3.72994e-11	SULF1/SFN/EFNB2/WNT5A/CEACAM1/HPN/STAT1/BRCA2/NFIB/PPARG/ZEB1/SPARC/ALOX5/ROBO1/SFRP2/TGFBR1/APOH/TGFBR3/GPC3/TGFB2/PAX6/EREG/CCL2/SFRP1/THBS1	25
BP	GO:0071559	response to transforming growth factor beta	4.0404e-13	3.89033e-11	FERMT1/ITGA3/PML/ITGB5/WNT5A/ACVR1/PMEPA1/COL1A2/COL1A1/HTRA3/SKIL/MXRA5/ID1/COL3A1/ASPN/PPARG/CTSK/ZEB1/COL4A2/FBN1/ITGB8/WNT2/HTRA1/TGFBR1/LOX/TGFBR3/DDR2/TGFB2/ANKRD1/SFRP1/THBS1	31
BP	GO:2001233	regulation of apoptotic signaling pathway	4.8385e-13	4.47028e-11	LGALS3/PML/CTTN/ACVR1/BCL2L1/INHBA/PSEN1/CXCL12/CTNNB1/ITGAV/CLU/ENO1/SKIL/MYC/MMP9/PLAUR/XBP1/ITGA6/CTH/GATA4/SFRP2/FAS/TGFBR1/MUC1/IL1A/TNFSF10/CD74/HIF1A/TP63/TNFAIP3/SFRP1/THBS1/PTGS2/VNN1/NR4A2/SERPINE1	36
BP	GO:0071772	response to BMP	4.92698e-13	4.47028e-11	SULF1/LEF1/RUNX2/ITGA3/WNT5A/ACVR1/GREM1/COMP/DKK1/HTRA3/SKIL/PDCD4/BMPR2/PPARG/FBN1/TNFAIP6/GATA4/SFRP2/HTRA1/FSTL1/TGFBR3/GPC3/SFRP4/TGFB2/SFRP1	25
BP	GO:0071773	cellular response to BMP stimulus	4.92698e-13	4.47028e-11	SULF1/LEF1/RUNX2/ITGA3/WNT5A/ACVR1/GREM1/COMP/DKK1/HTRA3/SKIL/PDCD4/BMPR2/PPARG/FBN1/TNFAIP6/GATA4/SFRP2/HTRA1/FSTL1/TGFBR3/GPC3/SFRP4/TGFB2/SFRP1	25
BP	GO:0022617	extracellular matrix disassembly	5.23205e-13	4.65751e-11	MMP14/MMP11/FAP/MMP12/HPN/MMP9/CTSK/PDPN/MMP3/MMP13/MMP2/MMP1/LRP1/MMP7/DDR2/PRSS2	16
BP	GO:0050863	regulation of T cell activation	5.67411e-13	4.95749e-11	LGALS3/LEF1/CD55/EFNB2/FANCD2/TNFSF4/CEACAM1/RUNX1/CTNNB1/CD80/PRDM1/IL18/HLA-A/ZEB1/LGALS1/XBP1/TNFRSF21/PDCD1LG2/ANXA1/IGFBP2/THY1/IDO1/KITLG/HLA-DRA/SDC4/HLA-DQB1/IL1A/TFRC/CD74/HLA-DQA1/HLA-DPA1/HLA-DRB1/NCKAP1L/CCL2/VNN1/IL7R	36
BP	GO:0072001	renal system development	5.86285e-13	5.00482e-11	SULF1/SDC1/ITGA3/EDNRA/EFNB2/ERBB4/WNT5A/CENPF/PROX1/ACAT1/GREM1/CTNNB1/ACTA2/STAT1/PRDM1/MYC/MMP9/AQP1/PTK7/PDGFRB/FBN1/ANGPT2/LGR5/COL4A1/LIF/TGFBR1/SDC4/GPC3/ITGB3/TGFB2/MME/SFRP1/EPCAM	33
BP	GO:0043542	endothelial cell migration	5.94044e-13	5.00482e-11	MET/EFNB2/WNT5A/CEACAM1/ITGB1/PROX1/LOXL2/GREM1/EPHA2/FAP/ID1/SRPX2/BMPR2/PPARG/SPARC/GPI/EGF/EFNA1/ANGPT2/MYH9/ANXA1/ROBO1/TGFBR1/FSTL1/APOH/ITGB3/HIF1A/DCN/CYP1B1/THBS1/PTGS2	31
BP	GO:0022409	positive regulation of cell-cell adhesion	8.31925e-13	6.886e-11	LEF1/CD55/EFNB2/TNFSF4/WNT5A/RUNX1/CD80/IL18/HLA-A/LGALS1/PLAUR/XBP1/PDPN/PDCD1LG2/ALOX5/ANXA1/IGFBP2/THY1/KITLG/HLA-DRA/HLA-DQB1/IL1A/TFRC/CD74/HLA-DQA1/HLA-DPA1/HLA-DRB1/NCKAP1L/CCL2/MMRN1/VNN1/IL7R/NR4A3	33
BP	GO:0030574	collagen catabolic process	8.79492e-13	7.15421e-11	MMP14/MMP11/ITGB1/FAP/MMP12/CTSB/MMP9/CTSK/MMP3/MMP13/MMP2/MMP1/MMP7/PRSS2	14
MF	GO:0019838	growth factor binding	6.5277e-13	7.34366e-11	IGFBP3/ACVR1/IGFBP5/EPHA2/ITGAV/COL1A2/COL1A1/COL5A1/COL3A1/SRPX2/NTRK2/ITGA6/PDGFRB/IGFBP7/IGFBP2/COL4A1/HTRA1/TGFBR1/OSMR/TGFBR3/ITGB3/THBS1	22
BP	GO:0022407	regulation of cell-cell adhesion	1.12896e-12	9.02786e-11	LGALS3/LEF1/EFNA5/CD55/EFNB2/TNFSF4/WNT5A/CEACAM1/RUNX1/CXCL12/CD80/IL18/HLA-A/LGALS1/PLAUR/XBP1/PDPN/TNFRSF21/PDCD1LG2/ALOX5/ANXA1/IGFBP2/THY1/IDO1/KITLG/HLA-DRA/SDC4/HLA-DQB1/IL1A/TFRC/CD74/HLA-DQA1/HLA-DPA1/HLA-DRB1/NCKAP1L/CCL2/MMRN1/EPCAM/VNN1/IL7R/NR4A3	41
BP	GO:0048762	mesenchymal cell differentiation	1.1664e-12	9.1718e-11	FN1/LEF1/SEMA7A/EDNRA/ERBB4/WNT5A/LOXL2/ACVR1/GREM1/CTNNB1/FAM83D/COL1A1/HPN/STAT1/FLNA/PDCD4/CDH2/PDPN/CORO1C/WNT2/EFNA1/SFRP2/TGFBR1/KITLG/S100A4/TGFBR3/TGFB2/HIF1A/SFRP1	29
BP	GO:0071560	cellular response to transforming growth factor beta stimulus	1.29772e-12	1.00371e-10	FERMT1/ITGA3/PML/ITGB5/WNT5A/ACVR1/PMEPA1/COL1A2/COL1A1/HTRA3/SKIL/ID1/COL3A1/ASPN/PPARG/CTSK/ZEB1/COL4A2/FBN1/ITGB8/WNT2/HTRA1/TGFBR1/LOX/TGFBR3/DDR2/TGFB2/ANKRD1/SFRP1/THBS1	30
BP	GO:0033674	positive regulation of kinase activity	1.67427e-12	1.27407e-10	MST1R/NOX4/EFNA5/ECT2/CEMIP/MET/ERBB4/WNT5A/PROX1/TPX2/GREM1/CCNB1/PSEN1/EPHA2/PDGFC/CLU/VLDLR/DKK1/PAK1/IL18/CDC6/BMPR2/KIF14/NTRK2/PDGFRB/EGF/EFNA1/TXN/ROBO1/KITLG/SDC4/AREG/CKS2/CD74/ITGB3/DDR2/TGFB2/EREG/HLA-DRB1/NCKAP1L/THBS1	41
BP	GO:0045861	negative regulation of proteolysis	2.00314e-12	1.50013e-10	PLAU/SFN/ANXA2/SPOCK1/PML/GAPDH/PLAT/ECM1/PSEN1/ARL6IP1/CTSB/COL6A3/TIMP2/MMP9/BST2/AQP1/PLAUR/GPI/TIMP1/TFPI2/SERPINH1/EFNA1/BIRC3/SFRP2/IFI16/LRP1/TFPI/GPC3/SERPINA5/RARRES1/SERPINB2/THBS1/PTGS2/SERPINE1	34
BP	GO:0060562	epithelial tube morphogenesis	2.49654e-12	1.84042e-10	LEF1/CTHRC1/MET/MMP14/EDNRA/EFNB2/RALA/PML/WNT5A/PROX1/ACVR1/GREM1/PSEN1/EPHA2/CTNNB1/STIL/PAK1/MYC/PTK7/EGF/WNT2/LGR5/GATA4/SFRP2/COL4A1/SDC4/GPC3/AREG/CXCL10/TGFB2/HIF1A/ADM/SFRP1	33
BP	GO:1903037	regulation of leukocyte cell-cell adhesion	2.93951e-12	2.13363e-10	LGALS3/LEF1/CD55/EFNB2/TNFSF4/CEACAM1/RUNX1/CXCL12/CD80/IL18/HLA-A/LGALS1/XBP1/TNFRSF21/PDCD1LG2/ALOX5/ANXA1/IGFBP2/THY1/IDO1/KITLG/HLA-DRA/SDC4/HLA-DQB1/IL1A/TFRC/CD74/HLA-DQA1/HLA-DPA1/HLA-DRB1/NCKAP1L/CCL2/VNN1/IL7R/NR4A3	35
BP	GO:0090287	regulation of cellular response to growth factor stimulus	3.19158e-12	2.2815e-10	FERMT1/SULF1/RUNX2/ITGA3/WNT5A/GREM1/HHEX/CTNNB1/PMEPA1/DKK1/HTRA3/SKIL/ASPN/BMPR2/PPARG/ZEB1/FBN1/TNFAIP6/ROBO1/GATA4/SFRP2/HTRA1/FSTL1/LOX/TGFBR3/GPC3/ITGA5/ITGB3/SFRP4/HIF1A/DCN/SFRP1/THBS1	33
BP	GO:0010466	negative regulation of peptidase activity	3.42886e-12	2.41453e-10	SFN/ANXA2/SPOCK1/GAPDH/ECM1/ARL6IP1/CTSB/COL6A3/TIMP2/MMP9/BST2/AQP1/PLAUR/GPI/TIMP1/TFPI2/SERPINH1/BIRC3/SFRP2/IFI16/LRP1/TFPI/GPC3/SERPINA5/RARRES1/SERPINB2/THBS1/PTGS2/SERPINE1	29
CC	GO:0005581	collagen trimer	5.1547e-12	2.59024e-10	COL10A1/COL11A1/CTHRC1/COL8A1/COL12A1/COL5A2/COL1A2/COL1A1/COL5A1/COL3A1/COL6A3/COL4A2/LUM/COL4A1/MARCO/LOX/MSR1	17
BP	GO:0001649	osteoblast differentiation	3.77633e-12	2.6201e-10	TPM4/LEF1/RUNX2/ITGA11/IGFBP3/SEMA7A/CTHRC1/CLIC1/VCAN/ACVR1/GREM1/IGFBP5/EPHA2/CTNNB1/FHL2/COL1A1/BMPR2/PPARG/TNFAIP6/SFRP2/IFITM1/LOX/AREG/DDR2/TP63/SPP1/TNC/SFRP1	28
BP	GO:2001234	negative regulation of apoptotic signaling pathway	6.05226e-12	4.13834e-10	LGALS3/CTTN/ACVR1/BCL2L1/PSEN1/CXCL12/CTNNB1/ITGAV/CLU/ENO1/MMP9/PLAUR/XBP1/ITGA6/CTH/GATA4/SFRP2/TGFBR1/MUC1/IL1A/CD74/HIF1A/TNFAIP3/THBS1/PTGS2/NR4A2/SERPINE1	27
CC	GO:0045121	membrane raft	9.52004e-12	4.14302e-10	SLC2A1/SULF1/EFNA5/ANXA2/ENO2/PGK1/CD55/F2R/HK1/ITGB1/EZR/PSEN1/CTNNB1/BMPR2/SLC1A2/BST2/CDH2/TUBB/PDPN/CORO1C/OLR1/SERPINH1/BIRC3/FAS/TGFBR1/THY1/TFPI/ABCA1/SDC4/MME/PTGS2	31
CC	GO:0098857	membrane microdomain	1.0306e-11	4.14302e-10	SLC2A1/SULF1/EFNA5/ANXA2/ENO2/PGK1/CD55/F2R/HK1/ITGB1/EZR/PSEN1/CTNNB1/BMPR2/SLC1A2/BST2/CDH2/TUBB/PDPN/CORO1C/OLR1/SERPINH1/BIRC3/FAS/TGFBR1/THY1/TFPI/ABCA1/SDC4/MME/PTGS2	31
MF	GO:0045296	cadherin binding	4.67663e-12	4.50961e-10	CAPG/PKM/SFN/ANXA2/CDH11/ANLN/CTTN/CLIC1/PPFIBP1/TBC1D2/ITGB1/ACVR1/PFKP/EZR/LDHA/PSEN1/EPHA2/TES/CTNNB1/CALD1/CCNB2/STAT1/FLNA/ENO1/BMPR2/CDH2/ITGA6/MYH9/ANXA1/NDRG1/CDH17/KRT18/EPCAM	33
BP	GO:0001822	kidney development	7.32376e-12	4.92701e-10	SULF1/SDC1/ITGA3/EDNRA/EFNB2/ERBB4/WNT5A/CENPF/PROX1/ACAT1/GREM1/CTNNB1/ACTA2/STAT1/PRDM1/MYC/MMP9/AQP1/PTK7/PDGFRB/FBN1/ANGPT2/LIF/TGFBR1/SDC4/GPC3/ITGB3/TGFB2/MME/SFRP1/EPCAM	31
BP	GO:0090092	regulation of transmembrane receptor protein serine/threonine kinase signaling pathway	7.41454e-12	4.92701e-10	FERMT1/SULF1/ITGA3/WNT5A/ACVR1/INHBA/GREM1/PMEPA1/DKK1/HTRA3/SKIL/ASPN/BMPR2/PPARG/ZEB1/FBN1/TNFAIP6/GATA4/SFRP2/HTRA1/TGFBR1/LRP1/FSTL1/LOX/TGFBR3/GPC3/SFRP4/TGFB2/SFRP1/THBS1	30
BP	GO:0006979	response to oxidative stress	8.73414e-12	5.72329e-10	ECT2/SDC1/MET/MMP14/EDNRA/PML/FANCD2/MELK/PSEN1/CTNNB1/COL1A1/STAT1/GPX2/MMP9/AQP1/BNIP3/PDGFRB/DHFR/CDK1/MMP3/PRDX4/TXN/ALOX5/ANXA1/GATA4/MMP2/AREG/IL1A/DDR2/HIF1A/TNFAIP3/HBB/CYP1B1/PTGS2/VNN1/NR4A3/NR4A2	37
BP	GO:0001763	morphogenesis of a branching structure	9.7142e-12	6.2783e-10	SULF1/LEF1/MET/MMP14/EDNRA/PML/WNT5A/PROX1/TGM2/ACVR1/GREM1/EPHA2/CTNNB1/PAK1/PRDM1/MYC/EGF/WNT2/SFRP2/COL4A1/GPC3/AREG/TP63/ADM/SFRP1	25
BP	GO:0007160	cell-matrix adhesion	9.99104e-12	6.36996e-10	ITGA2/FERMT1/FN1/EFNA5/ITGA11/PLAU/ITGA3/MMP14/CTTN/ITGB5/ITGB1/GREM1/MMP12/CTNNB1/ITGAV/COL3A1/ITGA6/CORO1C/ITGBL1/ITGB8/THY1/SDC4/ITGA5/ITGB3/SFRP1/THBS1/SERPINE1	27
BP	GO:1903039	positive regulation of leukocyte cell-cell adhesion	1.04212e-11	6.40909e-10	LEF1/CD55/EFNB2/TNFSF4/RUNX1/CD80/IL18/HLA-A/LGALS1/XBP1/PDCD1LG2/ALOX5/ANXA1/IGFBP2/THY1/KITLG/HLA-DRA/HLA-DQB1/IL1A/TFRC/CD74/HLA-DQA1/HLA-DPA1/HLA-DRB1/NCKAP1L/CCL2/VNN1/IL7R/NR4A3	29
BP	GO:0045766	positive regulation of angiogenesis	1.04599e-11	6.40909e-10	PKM/HK2/WNT5A/RUNX1/ITGB1/ECM1/GREM1/AQP1/XBP1/ITGB8/ANGPT2/GATA4/SFRP2/ADAM12/IL1A/CYBB/ITGA5/ITGB3/HIF1A/CXCL8/ADM/CYP1B1/THBS1/SERPINE1	24
BP	GO:1904018	positive regulation of vasculature development	1.04599e-11	6.40909e-10	PKM/HK2/WNT5A/RUNX1/ITGB1/ECM1/GREM1/AQP1/XBP1/ITGB8/ANGPT2/GATA4/SFRP2/ADAM12/IL1A/CYBB/ITGA5/ITGB3/HIF1A/CXCL8/ADM/CYP1B1/THBS1/SERPINE1	24
BP	GO:0061138	morphogenesis of a branching epithelium	1.17384e-11	7.10022e-10	SULF1/LEF1/MET/MMP14/EDNRA/PML/WNT5A/PROX1/TGM2/ACVR1/GREM1/EPHA2/CTNNB1/PAK1/MYC/EGF/WNT2/SFRP2/COL4A1/GPC3/AREG/TP63/ADM/SFRP1	24
BP	GO:0045860	positive regulation of protein kinase activity	1.44938e-11	8.65593e-10	MST1R/NOX4/EFNA5/ECT2/CEMIP/ERBB4/WNT5A/PROX1/TPX2/GREM1/CCNB1/PSEN1/PDGFC/CLU/VLDLR/DKK1/PAK1/IL18/CDC6/BMPR2/KIF14/PDGFRB/EGF/EFNA1/TXN/ROBO1/KITLG/SDC4/AREG/CKS2/ITGB3/DDR2/TGFB2/EREG/NCKAP1L/THBS1	36
BP	GO:0044409	entry into host	1.50327e-11	8.86556e-10	TMPRSS4/ITGA2/LY6E/CD55/EFNB2/ITGB5/ITGB1/EPHA2/ITGAV/ANPEP/CD80/CTSB/LGALS1/CDK1/IFITM1/MRC1/TFRC/CD74/ITGA5/ITGB3/CXCL8/HLA-DRB1	22
BP	GO:0043434	response to peptide hormone	1.55173e-11	9.03834e-10	SLC2A1/PKM/EDNRA/PRKCI/BTG2/CEACAM1/PLAT/PDK4/INHBA/IGFBP5/CXCL12/COL1A1/STAT1/COL3A1/CDC6/CCNA2/BRIP1/PPARG/CTSK/XBP1/FBN1/TIMP1/ANXA1/RARRES2/TGFBR3/AREG/TNFSF10/CYBB/ITGB3/DDR2/EREG/ADM/CYP1B1/PTGS2/NR4A3/NR4A2	36
CC	GO:0008305	integrin complex	3.07684e-11	1.12444e-09	ITGA2/ITGA11/ITGA3/ITGB5/ITGB1/ITGAV/ITGA6/ITGBL1/ITGB8/ITGA5/ITGB3	11
BP	GO:0031638	zymogen activation	2.61435e-11	1.50053e-09	PLAU/ANXA2/MMP14/PGK1/RUNX1/PLAT/KLKB1/HPN/ENO1/PLAUR/IFI16/APOH/C1R/THBS1/SERPINE1	15
BP	GO:0050817	coagulation	2.63976e-11	1.50053e-09	ITGA2/FN1/PLAU/ANXA2/CLIC1/F2R/CEACAM1/PLAT/KLKB1/PSEN1/FAP/COMP/FLNA/COL3A1/PLAUR/PDPN/TFPI2/MYH9/APOH/TFPI/ITGB3/SERPINB2/HBB/MMRN1/THBS1/SERPINE1	26
BP	GO:0007599	hemostasis	2.91199e-11	1.63557e-09	ITGA2/FN1/PLAU/ANXA2/CLIC1/F2R/CEACAM1/PLAT/KLKB1/FAP/COMP/FLNA/COL3A1/PLAUR/GPI/PDPN/TFPI2/MYH9/APOH/TFPI/ITGB3/SERPINB2/HBB/MMRN1/THBS1/SERPINE1	26
BP	GO:0050870	positive regulation of T cell activation	3.45951e-11	1.92023e-09	LEF1/CD55/EFNB2/TNFSF4/RUNX1/CD80/IL18/HLA-A/LGALS1/XBP1/PDCD1LG2/ANXA1/IGFBP2/THY1/KITLG/HLA-DRA/HLA-DQB1/IL1A/TFRC/CD74/HLA-DQA1/HLA-DPA1/HLA-DRB1/NCKAP1L/CCL2/VNN1/IL7R	27
BP	GO:0000280	nuclear division	4.36454e-11	2.39441e-09	ANLN/FANCD2/WNT5A/CENPF/TPX2/RACGAP1/TOP2A/KIF23/CCNB1/MKI67/RAD21/DLGAP5/PRC1/SMC4/ASPM/BUB1/CCNB2/NEK2/FLNA/NDC80/CHEK1/RAD51AP1/TRIP13/BRCA2/CDC6/NUF2/BRIP1/KIF14/UBE2C/KIF11/PDGFRB/EGF/KIF4A/BUB1B/LIF/CKS2/IL1A/EREG	38
BP	GO:0046718	viral entry into host cell	4.4918e-11	2.4359e-09	TMPRSS4/ITGA2/LY6E/CD55/EFNB2/ITGB5/ITGB1/EPHA2/ITGAV/ANPEP/CD80/CTSB/LGALS1/CDK1/IFITM1/MRC1/TFRC/CD74/ITGA5/ITGB3/HLA-DRB1	21
BP	GO:0051346	negative regulation of hydrolase activity	4.59003e-11	2.46088e-09	LGALS3/SFN/ANXA2/SPOCK1/GAPDH/ECM1/ARL6IP1/CTSB/COL6A3/TIMP2/MMP9/BST2/AQP1/PLAUR/GPI/TIMP1/TFPI2/SERPINH1/BIRC3/ANXA1/SFRP2/IFI16/LRP1/TFPI/GPC3/SERPINA5/TGFB2/RARRES1/SERPINB2/NCKAP1L/THBS1/PTGS2/SERPINE1	33
CC	GO:0045178	basal part of cell	8.10429e-11	2.71494e-09	SLC2A1/ITGA2/MST1R/CEACAM5/SLC16A3/ITGA3/SLC6A6/ANXA2/MET/ERBB4/CEACAM1/EZR/FAP/CTNNB1/AQP1/CDH2/PDPN/MSN/ANXA1/CA9/DST/LRP1/SLC4A4/TFRC/CDH17/EPCAM/AQP9	27
BP	GO:0001837	epithelial to mesenchymal transition	5.80599e-11	3.07783e-09	LEF1/EDNRA/WNT5A/LOXL2/ACVR1/GREM1/CTNNB1/FAM83D/COL1A1/HPN/FLNA/PDCD4/PDPN/WNT2/EFNA1/SFRP2/TGFBR1/S100A4/TGFBR3/TGFB2/HIF1A/SFRP1	22
BP	GO:0050900	leukocyte migration	5.98763e-11	3.13885e-09	ITGA2/LGALS3/ITGA3/MMP14/WNT5A/ITGB1/ECM1/GREM1/CXCL12/CXCL5/CCL20/MMP9/PTGER4/ITGA6/MSN/ALOX5/TNFAIP6/MYH9/ANXA1/THY1/MMP2/KITLG/RARRES2/CXCL10/IL1A/CCL18/CD74/ITGB3/TGFB2/CXCL8/NCKAP1L/CCL2/THBS1/SERPINE1	34
BP	GO:0051701	biological process involved in interaction with host	6.05995e-11	3.14185e-09	TMPRSS4/ITGA2/LY6E/CD55/EFNB2/ITGB5/ITGB1/BCL2L1/EPHA2/ITGAV/ANPEP/CD80/CTSB/LRRC15/LGALS1/CDK1/IFITM1/MRC1/TFRC/CD74/ITGA5/ITGB3/CXCL8/HLA-DRB1	24
BP	GO:0007584	response to nutrient	6.56276e-11	3.36556e-09	ITGA2/POSTN/RUNX2/COL1A1/STAT1/BRIP1/PPARG/XBP1/TYMS/TNFRSF11B/IGFBP2/GATA4/SFRP2/CXCL10/IL1A/TFRC/CYBB/SPP1/SFRP1/CYP1B1/PTGS2	21
BP	GO:0010755	regulation of plasminogen activation	7.02635e-11	3.56455e-09	PLAU/ANXA2/RUNX1/PLAT/HPN/ENO1/PLAUR/THBS1/SERPINE1	9
BP	GO:0019058	viral life cycle	8.08768e-11	4.05933e-09	TMPRSS4/ITGA2/LY6E/CD55/EFNB2/ITGB5/ITGB1/PROX1/TOP2A/EPHA2/ITGAV/ANPEP/CD80/EIF2AK2/CTSB/LRRC15/BST2/LGALS1/CDK1/IFITM1/KPNA2/IFI16/MRC1/TFRC/CD74/ITGA5/ITGB3/CXCL8/HLA-DRB1/CCL2	30
BP	GO:0030510	regulation of BMP signaling pathway	8.31179e-11	4.1279e-09	SULF1/ITGA3/WNT5A/GREM1/DKK1/HTRA3/SKIL/BMPR2/PPARG/FBN1/TNFAIP6/GATA4/SFRP2/HTRA1/FSTL1/GPC3/SFRP4/SFRP1	18
BP	GO:0007596	blood coagulation	9.32016e-11	4.58047e-09	ITGA2/FN1/PLAU/ANXA2/CLIC1/F2R/CEACAM1/PLAT/KLKB1/FAP/COMP/FLNA/COL3A1/PLAUR/PDPN/TFPI2/MYH9/APOH/TFPI/ITGB3/SERPINB2/HBB/MMRN1/THBS1/SERPINE1	25
BP	GO:0048568	embryonic organ development	9.617e-11	4.65662e-09	KRT19/COL11A1/LEF1/RUNX2/CTHRC1/MMP14/EDNRA/WNT5A/PROX1/ACVR1/PSEN1/EPHA2/CTNNB1/PDGFC/HPN/E2F7/STIL/PRDM1/ZEB1/PTK7/FBN1/WNT2/EFNA1/GATA4/PRRX1/LIF/TGFBR1/KITLG/MFAP5/RARRES2/LRIG1/TGFB2/PAX6/HIF1A/CXCL8/ADM	36
BP	GO:1900047	negative regulation of hemostasis	9.6725e-11	4.65662e-09	PLAU/ANXA2/CEACAM1/PLAT/KLKB1/FAP/COMP/PLAUR/APOH/TFPI/SERPINB2/THBS1/SERPINE1	13
BP	GO:0052548	regulation of endopeptidase activity	1.0342e-10	4.92865e-09	EGLN3/SFN/ANXA2/SPOCK1/PML/F2R/GAPDH/ARL6IP1/COL6A3/TIMP2/MYC/PPARG/MMP9/BST2/AQP1/PLAUR/GPI/TIMP1/TFPI2/SERPINH1/EFNA1/BIRC3/ROBO1/SFRP2/FAS/IFI16/TFPI/SERPINA5/TNFSF10/RARRES1/SERPINB2/TP63/THBS1/PTGS2/SERPINE1	35
BP	GO:0031667	response to nutrient levels	1.12189e-10	5.29309e-09	SLC2A1/ITGA2/POSTN/RUNX2/PROX1/RASAL2/PDK4/ACAT1/NUAK1/EIF2AK2/COL1A1/STAT1/BMPR2/BRIP1/PPARG/CTSK/ZEB1/XBP1/BNIP3/TYMS/TNFRSF11B/IGFBP2/GATA4/SFRP2/FAS/IFI16/CD68/CXCL10/IL1A/TFRC/CYBB/DSC2/ADM/SPP1/SFRP1/CYP1B1/PTGS2	37
BP	GO:0042692	muscle cell differentiation	1.24738e-10	5.82689e-09	KRT19/NOX4/CEACAM5/SDC1/MMP14/EDNRA/EFNB2/ITGB1/PROX1/ACVR1/GREM1/IGFBP5/CTNNB1/FHL2/COMP/DKK1/PDCD4/SGCB/BMPR2/ZEB1/CDH2/XBP1/PDGFRB/CDK1/CTH/MYH9/GATA4/LAMB1/LOX/ADAM12/CXCL10/ANKRD1/EREG/ADM	34
BP	GO:0033002	muscle cell proliferation	1.30409e-10	6.03203e-09	ITGA2/IGFBP3/ERBB4/RUNX1/IGFBP5/CTNNB1/STAT1/PDCD4/IL18/BMPR2/PPARG/MMP9/PDGFRB/CDK1/WNT2/TGFBR1/MMP2/TGFBR3/ITGB3/DDR2/TGFB2/EREG/TNFAIP3/THBS1/PTGS2/NR4A3	26
CC	GO:0009897	external side of plasma membrane	2.50748e-10	7.7539e-09	ITGA2/ANTXR1/EFNA5/ITGA11/SDC1/SEMA7A/ITGA3/ITGB1/NT5E/CXCL12/ITGAV/ANPEP/CD80/CTSB/CTSK/ITGA6/WNT2/PDCD1LG2/ANXA1/FAS/THY1/AZGP1/OSMR/ABCA1/TGFBR3/CXCL10/SERPINA5/TFRC/CD74/ITGA5/ITGB3/MSR1/HLA-DRB1/THBS1/IL7R	35
MF	GO:0030020	extracellular matrix structural constituent conferring tensile strength	1.21294e-10	1.02342e-08	COL10A1/COL11A1/COL8A1/COL12A1/COL5A2/COL1A2/COL1A1/COL5A1/COL3A1/COL6A3/COL4A2/COL4A1	12
BP	GO:0001819	positive regulation of cytokine production	2.27653e-10	1.04278e-08	FERMT1/SULF1/SEMA7A/CD55/TNFSF4/F2R/WNT5A/HK1/RUNX1/GAPDH/PSEN1/MMP12/CD80/EIF2AK2/CLU/STAT1/IL18/HLA-A/PTGER4/XBP1/LUM/ANXA1/GATA4/HILPDA/IFI16/IDO1/IL1A/CYBB/CD74/HIF1A/EREG/HLA-DPA1/CYP1B1/THBS1/PTGS2/NR4A3/SERPINE1	37
BP	GO:0042730	fibrinolysis	2.33631e-10	1.05987e-08	PLAU/ANXA2/PLAT/KLKB1/FAP/PLAUR/APOH/SERPINB2/THBS1/SERPINE1	10
CC	GO:0030666	endocytic vesicle membrane	3.74419e-10	1.07512e-08	WNT5A/TAP1/TAP2/HLA-C/HLA-B/HLA-A/EGF/MARCO/LRP1/HLA-DRA/HLA-DQB1/AREG/TFRC/CYBB/CD74/MSR1/HLA-DQA1/EREG/HLA-DPA1/CFTR/HLA-DRB1/IL7R	22
BP	GO:0016032	viral process	2.69437e-10	1.20053e-08	TMPRSS4/ITGA2/LEF1/LY6E/CD55/EFNB2/ITGB5/ITGB1/PROX1/BCL2L1/TOP2A/EPHA2/ITGAV/ANPEP/CD80/EIF2AK2/HPN/STAT1/CTSB/LRRC15/BST2/LGALS1/CDK1/IFITM1/KPNA2/IFI16/MRC1/TFRC/CD74/ITGA5/ITGB3/CXCL8/HLA-DRB1/CCL2	34
BP	GO:0002573	myeloid leukocyte differentiation	2.69725e-10	1.20053e-08	LEF1/ANXA2/CEACAM1/RUNX1/INHBA/PSEN1/EPHA2/CTNNB1/MYC/PPARG/MMP9/FBN1/ITGB8/TNFRSF11B/TNFAIP6/MYH9/LIF/IFI16/KITLG/GPC3/TFRC/CD74/HLA-DRB1/SFRP1	24
BP	GO:0044000	movement in host	2.78307e-10	1.22715e-08	TMPRSS4/ITGA2/LY6E/CD55/EFNB2/ITGB5/ITGB1/EPHA2/ITGAV/ANPEP/CD80/CTSB/LGALS1/CDK1/IFITM1/MRC1/TFRC/CD74/ITGA5/ITGB3/CXCL8/HLA-DRB1	22
CC	GO:0009925	basal plasma membrane	4.92713e-10	1.32047e-08	SLC2A1/MST1R/CEACAM5/SLC16A3/ITGA3/SLC6A6/ANXA2/MET/ERBB4/CEACAM1/EZR/CTNNB1/AQP1/CDH2/PDPN/MSN/ANXA1/CA9/DST/LRP1/SLC4A4/TFRC/CDH17/EPCAM/AQP9	25
MF	GO:0004252	serine-type endopeptidase activity	1.80952e-10	1.35714e-08	TMPRSS4/PLAU/MMP14/MMP11/PLAT/KLKB1/FAP/MMP12/HPN/HTRA3/MMP9/CTSK/BMP1/MMP3/MMP13/HTRA1/MMP2/MMP1/MMP7/C1S/C1R/PRSS2	22
BP	GO:0046031	ADP metabolic process	3.19852e-10	1.39728e-08	PKM/HK2/ENO2/PGK1/HK1/GAPDH/PFKP/LDHA/PSEN1/AK4/NT5E/ENO1/ALDOC/GPI/SLC4A4/HIF1A	16
BP	GO:0018212	peptidyl-tyrosine modification	3.67775e-10	1.59189e-08	MST1R/NOX4/EFNA5/PKM/MET/ERBB4/ACVR1/MELK/GREM1/PSEN1/EPHA2/PDGFC/CD80/EIF2AK2/IL18/NTRK2/TPST2/PDGFRB/EGF/EFNA1/SFRP2/LIF/THY1/KITLG/AREG/CD74/ITGA5/ITGB3/DDR2/WEE1/EREG/SFRP1	32
BP	GO:0010810	regulation of cell-substrate adhesion	3.92797e-10	1.68474e-08	FERMT1/FN1/EFNA5/PLAU/AGR2/ITGA3/MMP14/EDIL3/SPOCK1/COL8A1/GREM1/MMP12/COL1A1/FLNA/PDPN/CORO1C/ANGPT2/THY1/SDC4/ITGA5/ITGB3/SFRP1/THBS1/SERPINE1	24
BP	GO:0090068	positive regulation of cell cycle process	4.02797e-10	1.71207e-08	ECT2/WNT5A/RACGAP1/KIF23/CCNB1/RAD21/DLGAP5/CIT/SMC4/FAM83D/E2F7/NDC80/STIL/RAD51AP1/CDC6/DTL/KIF14/UBE2C/GPSM2/PDGFRB/EGF/CDK1/ANXA1/IL1A/DDR2/EREG	26
BP	GO:0045787	positive regulation of cell cycle	4.06787e-10	1.71359e-08	ECT2/WNT5A/PROX1/RACGAP1/KIF23/CCNB1/RAD21/DLGAP5/CIT/SMC4/FAM83D/E2F7/NDC80/CHEK1/STIL/RAD51AP1/BRCA2/CDC6/DTL/KIF14/UBE2C/GPSM2/PDGFRB/EGF/CDK1/ANXA1/CKS2/IL1A/DDR2/TGFB2/EREG	31
BP	GO:1901654	response to ketone	4.38346e-10	1.83019e-08	POSTN/EFNA5/TNFSF4/BCL2L1/PLAT/AHR/PTGER4/AQP1/GPI/IGFBP7/TYMS/FIBIN/MSN/CA9/TGFBR3/CYBB/TGFB2/CFTR/SPP1/FOSB/SFRP1/CYP1B1/THBS1	23
CC	GO:0030139	endocytic vesicle	7.39953e-10	1.85913e-08	CEMIP/RALA/ITGB5/WNT5A/ITGAV/TAP1/TAP2/HLA-C/HLA-B/HLA-A/SPARC/EGF/MARCO/LRP1/HLA-DRA/ABCA1/HLA-DQB1/AREG/TFRC/CYBB/CD74/MSR1/HLA-DQA1/EREG/HLA-DPA1/CFTR/HBB/HLA-DRB1/IL7R	29
BP	GO:0009314	response to radiation	4.53812e-10	1.87815e-08	ECT2/PML/FANCD2/ITGB1/BCL2L1/BHLHE40/CXCL12/CRIP1/XRCC4/CHEK1/RAD51AP1/PRDM1/BRCA2/COL3A1/DTL/MYC/SLC1A2/MMP9/AQP1/TIMP1/MMP3/TXN/ANGPT2/ANXA1/SFRP2/MMP2/IFI16/MMP1/CXCL10/IL1A/ITGB3/HIF1A/MME/SFRP1/PTGS2	35
BP	GO:0050679	positive regulation of epithelial cell proliferation	4.72461e-10	1.93832e-08	RUNX2/WNT5A/PROX1/ECM1/CXCL12/MMP12/CTNNB1/HPN/ID1/BMPR2/MYC/XBP1/EGF/WNT2/LAMB1/HTRA1/TGFBR1/AREG/ITGB3/HIF1A/TP63/TNFAIP3/SFRP1/NR4A3	24
BP	GO:0043588	skin development	4.8649e-10	1.97867e-08	ITGA2/FERMT1/ITGA3/SFN/MET/WNT5A/INHBA/PSEN1/IGFBP5/EPHA2/CTNNB1/COL5A2/COL1A2/COL1A1/COL5A1/COMP/DKK1/COL3A1/IL18/ITGA6/LGR5/ANXA1/IL1A/TGFB2/PAX6/TP63/EREG/KRT8	28
BP	GO:0007044	cell-substrate junction assembly	5.2543e-10	2.11879e-08	LAMA3/ITGA2/FN1/EFNA5/MMP14/CTTN/GREM1/ITGA6/CORO1C/DST/THY1/SDC4/ITGA5/ITGB3/SFRP1/THBS1	16
BP	GO:0048608	reproductive structure development	6.57226e-10	2.62779e-08	SULF1/SDC1/MMP14/WNT5A/BCL2L1/INHBA/CTNNB1/CRIP1/ASPM/BRCA2/BRIP1/PDGFRB/PRDX4/TNFAIP6/ANXA1/GATA4/SFRP2/TGFBR1/MMP2/KITLG/IL1A/TNFSF10/TGFB2/TP63/EREG/TNC/SFRP1/CYP1B1	28
BP	GO:0070661	leukocyte proliferation	6.70539e-10	2.65849e-08	LGALS3/LEF1/CD55/TNFSF4/BCL2L1/GREM1/HHEX/CTNNB1/AHR/CD80/CLU/IL18/HLA-A/BST2/TNFRSF21/PDCD1LG2/MSN/ANXA1/IGFBP2/IDO1/KITLG/SDC4/IL1A/TFRC/CD74/HLA-DPA1/TNFAIP3/HLA-DRB1/NCKAP1L/IL7R	30
BP	GO:0044403	biological process involved in symbiotic interaction	7.07973e-10	2.78351e-08	TMPRSS4/ITGA2/FN1/LEF1/LY6E/CD55/EFNB2/ITGB5/GAPDH/ITGB1/BCL2L1/EPHA2/ITGAV/ANPEP/CD80/HPN/CTSB/LRRC15/LGALS1/CDK1/IFITM1/MRC1/TFRC/CD74/ITGA5/ITGB3/CXCL8/HLA-DRB1	28
BP	GO:0007162	negative regulation of cell adhesion	7.62389e-10	2.97269e-08	LGALS3/EFNA5/MMP14/SPOCK1/TNFSF4/CEACAM1/RUNX1/CXCL12/MMP12/CD80/COL1A1/TGFBI/TNFRSF21/CORO1C/PDCD1LG2/ANGPT2/ANXA1/MMP2/IDO1/MUC1/SDC4/CD74/HLA-DRB1/NCKAP1L/CYP1B1/THBS1/EPCAM/SERPINE1	28
MF	GO:0005125	cytokine activity	5.23588e-10	3.21293e-08	TNFSF4/WNT5A/INHBA/GREM1/CXCL12/CXCL5/CCL20/IL18/BMP1/GPI/TIMP1/WNT2/TNFRSF11B/LIF/KITLG/AREG/CXCL10/IL1A/TNFSF10/CCL18/CXCL14/TGFB2/CXCL8/SPP1/CCL2	25
MF	GO:0005539	glycosaminoglycan binding	5.23588e-10	3.21293e-08	LAMC2/COL11A1/FN1/SULF1/POSTN/CEMIP/THBS2/HK1/VCAN/BGN/DPYSL3/COL5A1/COMP/APLP1/FBN1/TNFAIP6/FSTL1/APOH/TGFBR3/CXCL10/SERPINA5/DCN/CXCL8/SFRP1/THBS1	25
BP	GO:0070663	regulation of leukocyte proliferation	8.42635e-10	3.25865e-08	LGALS3/CD55/TNFSF4/BCL2L1/GREM1/HHEX/CTNNB1/AHR/CD80/IL18/HLA-A/BST2/TNFRSF21/PDCD1LG2/ANXA1/IGFBP2/IDO1/KITLG/SDC4/IL1A/TFRC/CD74/HLA-DPA1/TNFAIP3/HLA-DRB1/NCKAP1L	26
BP	GO:0033628	regulation of cell adhesion mediated by integrin	8.5323e-10	3.2728e-08	FERMT1/PLAU/EPHA2/EFNA1/SFRP2/LIF/MUC1/ITGB3/TGFB2/NCKAP1L/CYP1B1/SERPINE1	12
BP	GO:0061458	reproductive system development	8.83233e-10	3.33839e-08	SULF1/SDC1/MMP14/WNT5A/BCL2L1/INHBA/CTNNB1/CRIP1/ASPM/BRCA2/BRIP1/PDGFRB/PRDX4/TNFAIP6/ANXA1/GATA4/SFRP2/TGFBR1/MMP2/KITLG/IL1A/TNFSF10/TGFB2/TP63/EREG/TNC/SFRP1/CYP1B1	28
BP	GO:0002685	regulation of leukocyte migration	8.86903e-10	3.33839e-08	ITGA2/LGALS3/MMP14/WNT5A/ECM1/GREM1/CXCL12/CCL20/PTGER4/MSN/TNFAIP6/ANXA1/THY1/KITLG/RARRES2/CXCL10/IL1A/CD74/ITGB3/CXCL8/NCKAP1L/CCL2/THBS1/SERPINE1	24
BP	GO:1900046	regulation of hemostasis	8.91559e-10	3.33839e-08	PLAU/ANXA2/F2R/CEACAM1/PLAT/KLKB1/FAP/COMP/PLAUR/APOH/TFPI/SERPINB2/THBS1/SERPINE1	14
CC	GO:0042611	MHC protein complex	1.72672e-09	3.73333e-08	HLA-C/HLA-B/HLA-A/HLA-DRA/HLA-DQB1/CD74/HLA-DQA1/HLA-DPA1/HLA-DRB1	9
CC	GO:0005583	fibrillar collagen trimer	1.76451e-09	3.73333e-08	COL11A1/COL5A2/COL1A2/COL1A1/COL5A1/COL3A1/LUM	7
CC	GO:0098643	banded collagen fibril	1.76451e-09	3.73333e-08	COL11A1/COL5A2/COL1A2/COL1A1/COL5A1/COL3A1/LUM	7
BP	GO:0010951	negative regulation of endopeptidase activity	1.04033e-09	3.86477e-08	SFN/ANXA2/SPOCK1/GAPDH/ARL6IP1/COL6A3/TIMP2/MMP9/BST2/AQP1/PLAUR/GPI/TIMP1/TFPI2/SERPINH1/BIRC3/SFRP2/IFI16/TFPI/SERPINA5/RARRES1/SERPINB2/THBS1/PTGS2/SERPINE1	25
BP	GO:0051783	regulation of nuclear division	1.07077e-09	3.92789e-08	WNT5A/CENPF/CCNB1/MKI67/RAD21/DLGAP5/BUB1/NEK2/NDC80/CHEK1/RAD51AP1/TRIP13/NUF2/PDGFRB/EGF/BUB1B/LIF/IL1A/EREG	19
BP	GO:0002062	chondrocyte differentiation	1.07482e-09	3.92789e-08	COL11A1/SULF1/RUNX2/RUNX1/LOXL2/ECM1/GREM1/CTNNB1/COMP/TGFBI/COL3A1/NFIB/BMPR2/SERPINH1/SFRP2/TGFBR1/HIF1A	17
BP	GO:0050867	positive regulation of cell activation	1.08229e-09	3.92789e-08	LEF1/MMP14/CD55/EFNB2/TNFSF4/WNT5A/RUNX1/ACTA2/CD80/FLNA/IL18/HLA-A/LGALS1/XBP1/PDGFRB/PDCD1LG2/ANXA1/IGFBP2/THY1/KITLG/HLA-DRA/HLA-DQB1/IL1A/TFRC/CD74/DDR2/HLA-DQA1/HLA-DPA1/HLA-DRB1/NCKAP1L/CCL2/THBS1/VNN1/IL7R/NR4A3	35
BP	GO:0030195	negative regulation of blood coagulation	1.09943e-09	3.95962e-08	PLAU/ANXA2/CEACAM1/PLAT/KLKB1/FAP/PLAUR/APOH/TFPI/SERPINB2/THBS1/SERPINE1	12
BP	GO:0042542	response to hydrogen peroxide	1.19383e-09	4.26705e-08	ECT2/SDC1/MET/COL1A1/STAT1/AQP1/BNIP3/PDGFRB/CDK1/TXN/ANXA1/MMP2/AREG/DDR2/TNFAIP3/HBB/CYP1B1/NR4A3	18
BP	GO:0021537	telencephalon development	1.33185e-09	4.68702e-08	SLC2A1/LEF1/SEMA7A/ERBB4/BTG2/WNT5A/PROX1/INHBA/PSEN1/CXCL12/CTNNB1/ASPM/COL3A1/SRGAP2C/NFIB/SLC1A2/KIF14/AQP1/NTRK2/CDH2/BNIP3/ROBO1/LAMB1/PAX6/HIF1A	25
BP	GO:0018108	peptidyl-tyrosine phosphorylation	1.33237e-09	4.68702e-08	MST1R/NOX4/EFNA5/PKM/MET/ERBB4/ACVR1/MELK/GREM1/PSEN1/EPHA2/PDGFC/CD80/EIF2AK2/IL18/NTRK2/PDGFRB/EGF/EFNA1/SFRP2/LIF/THY1/KITLG/AREG/CD74/ITGA5/ITGB3/DDR2/WEE1/EREG/SFRP1	31
BP	GO:0150115	cell-substrate junction organization	1.34114e-09	4.68702e-08	LAMA3/ITGA2/FN1/EFNA5/MMP14/CTTN/GREM1/ITGA6/CORO1C/DST/THY1/SDC4/ITGA5/ITGB3/SFRP1/THBS1	16
MF	GO:0002020	protease binding	8.40931e-10	4.73023e-08	FN1/ITGA3/ANXA2/ITGB1/ECM1/FAP/ITGAV/COL1A2/COL1A1/COMP/BRCA2/COL3A1/TIMP2/NTRK2/TIMP1/SERPINA5/ITGB3/TNFAIP3/SERPINE1	19
BP	GO:1902105	regulation of leukocyte differentiation	1.46352e-09	5.06923e-08	LEF1/MMP14/FANCD2/TNFSF4/CEACAM1/RUNX1/INHBA/CTNNB1/CD80/PRDM1/HLA-B/IL18/MYC/ZEB1/XBP1/FBN1/TNFRSF11B/TNFAIP6/ANXA1/LIF/KITLG/HLA-DRA/CD74/HLA-DRB1/NCKAP1L/SFRP1/VNN1/IL7R	28
BP	GO:0043410	positive regulation of MAPK cascade	1.47199e-09	5.06923e-08	MST1R/NOX4/IGFBP3/SEMA7A/ERBB4/F2R/WNT5A/INHBA/PSEN1/CTNNB1/PDGFC/CCL20/ACTA2/EIF2AK2/DKK1/PAK1/NTRK2/CDH2/PDGFRB/EGF/EFNA1/ROBO1/GATA4/MARCO/LIF/TGFBR1/KITLG/IL1A/CCL18/CD74/ITGB3/DDR2/TGFB2/HLA-DRB1/CCL2/THBS1	36
BP	GO:1903131	mononuclear cell differentiation	1.51536e-09	5.18079e-08	LEF1/RUNX2/MMP14/FANCD2/TNFSF4/RUNX1/ITGB1/INHBA/PSEN1/HHEX/CTNNB1/CD80/PRDM1/HLA-B/IL18/MYC/PPARG/CTSK/PTGER4/ZEB1/LGALS1/XBP1/ITGB8/MYH9/ANXA1/IFI16/HLA-DRA/IL1A/CD74/CDH17/HLA-DRB1/NCKAP1L/SFRP1/VNN1/IL7R	35
MF	GO:0030546	signaling receptor activator activity	1.01148e-09	5.25191e-08	LGALS3/EFNA5/SEMA7A/TNFSF4/WNT5A/INHBA/GREM1/CXCL12/CXCL5/PDGFC/CCL20/DKK1/IL18/BMPR2/BMP1/GPI/EGF/FBN1/TIMP1/WNT2/TNFRSF11B/SFRP2/LIF/KITLG/MACC1/AREG/CXCL10/IL1A/TNFSF10/CCL18/CXCL14/TGFB2/EREG/CXCL8/ADM/SPP1/CCL2	37
BP	GO:0014706	striated muscle tissue development	1.56695e-09	5.29213e-08	NOX4/COL11A1/LEF1/EDNRA/EFNB2/ERBB4/WNT5A/RUNX1/CENPF/ITGB1/PROX1/ACVR1/GREM1/FHL2/DKK1/SGCB/PDGFRB/CDK1/WNT2/GATA4/TGFBR1/LOX/TGFBR3/TGFB2/ANKRD1	25
BP	GO:0050818	regulation of coagulation	1.57036e-09	5.29213e-08	PLAU/ANXA2/F2R/CEACAM1/PLAT/KLKB1/PSEN1/FAP/PLAUR/APOH/TFPI/SERPINB2/THBS1/SERPINE1	14
BP	GO:0070371	ERK1 and ERK2 cascade	1.66412e-09	5.56832e-08	NOX4/FN1/SEMA7A/ERBB4/F2R/CEACAM1/EZR/INHBA/EPHA2/ITGAV/PDGFC/FAM83D/CCL20/ACTA2/MYC/PTGER4/PDGFRB/EGF/CDK1/GATA4/MARCO/LIF/IL1A/CCL18/CD74/ITGB3/DDR2/HLA-DRB1/CCL2	29
BP	GO:0016525	negative regulation of angiogenesis	1.70766e-09	5.67377e-08	SULF1/PGK1/PML/THBS2/EPHA2/HHEX/CTNNB1/STAT1/PPARG/SPARC/COL4A2/ANGPT2/ALOX5/APOH/CXCL10/TGFB2/DCN/THBS1/SERPINE1	19
MF	GO:0008236	serine-type peptidase activity	1.21761e-09	5.87061e-08	TMPRSS4/PLAU/MMP14/MMP11/PLAT/KLKB1/FAP/MMP12/HPN/HTRA3/MMP9/CTSK/BMP1/MMP3/MMP13/HTRA1/MMP2/MMP1/MMP7/C1S/C1R/PRSS2	22
CC	GO:0045177	apical part of cell	3.11076e-09	6.25263e-08	SLC2A1/CEACAM5/FN1/SLC16A3/SLC6A6/PRKCI/CEACAM1/ACVR1/PLAT/EZR/PSEN1/FAP/CTNNB1/ASPM/HPN/CTSB/CTSK/BST2/AQP1/CDH2/PDGFRB/PDPN/MSN/ANXA1/IGFBP2/THY1/OSMR/MUC1/ITGB3/DDR2/CFTR/EPCAM	32
BP	GO:0048002	antigen processing and presentation of peptide antigen	2.03058e-09	6.69951e-08	TAP1/TAP2/HLA-C/HLA-B/HLA-A/AZGP1/HLA-DRA/HLA-DQB1/IFI30/CD74/HLA-DQA1/HLA-DPA1/HLA-DRB1	13
BP	GO:0009135	purine nucleoside diphosphate metabolic process	2.0888e-09	6.79652e-08	PKM/HK2/ENO2/PGK1/HK1/GAPDH/PFKP/LDHA/PSEN1/AK4/NT5E/ENO1/ALDOC/GPI/SLC4A4/HIF1A	16
BP	GO:0009179	purine ribonucleoside diphosphate metabolic process	2.0888e-09	6.79652e-08	PKM/HK2/ENO2/PGK1/HK1/GAPDH/PFKP/LDHA/PSEN1/AK4/NT5E/ENO1/ALDOC/GPI/SLC4A4/HIF1A	16
BP	GO:2000181	negative regulation of blood vessel morphogenesis	2.14385e-09	6.9262e-08	SULF1/PGK1/PML/THBS2/EPHA2/HHEX/CTNNB1/STAT1/PPARG/SPARC/COL4A2/ANGPT2/ALOX5/APOH/CXCL10/TGFB2/DCN/THBS1/SERPINE1	19
BP	GO:0051960	regulation of nervous system development	2.15801e-09	6.9262e-08	FN1/LEF1/EFNA5/SEMA7A/ANXA2/PRKCI/THBS2/WNT5A/ITGB1/PROX1/TGM2/BHLHE40/PSEN1/CXCL12/CTNNB1/ASPM/SLC25A12/DKK1/SKIL/ID1/SRPX2/BMPR2/KIF14/NTRK2/TNFRSF21/WNT2/ROBO1/LIF/THY1/CRABP2/PAX6/HIF1A/MME/SPP1	34
BP	GO:0000302	response to reactive oxygen species	2.23663e-09	7.13002e-08	ECT2/SDC1/MET/COL1A1/STAT1/MMP9/AQP1/BNIP3/PDGFRB/DHFR/CDK1/TXN/ANXA1/MMP2/AREG/IL1A/DDR2/HIF1A/TNFAIP3/HBB/CYP1B1/NR4A3	22
BP	GO:0062197	cellular response to chemical stress	2.32729e-09	7.36922e-08	SLC2A1/ECT2/MET/EDNRA/PML/FANCD2/MELK/CTNNB1/MMP9/AQP1/BNIP3/MYLK/DHFR/CDK1/MMP3/TXN/ALOX5/ANXA1/GATA4/FAS/MMP2/DDR2/HIF1A/TNFAIP3/CYP1B1/PTGS2/VNN1/NR4A3/NR4A2	29
BP	GO:1901343	negative regulation of vasculature development	2.39867e-09	7.54461e-08	SULF1/PGK1/PML/THBS2/EPHA2/HHEX/CTNNB1/STAT1/PPARG/SPARC/COL4A2/ANGPT2/ALOX5/APOH/CXCL10/TGFB2/DCN/THBS1/SERPINE1	19
BP	GO:0140014	mitotic nuclear division	2.55933e-09	7.99663e-08	ANLN/CENPF/TPX2/RACGAP1/KIF23/CCNB1/MKI67/RAD21/DLGAP5/PRC1/SMC4/BUB1/NEK2/FLNA/NDC80/CHEK1/TRIP13/CDC6/NUF2/KIF14/UBE2C/KIF11/PDGFRB/EGF/KIF4A/BUB1B/IL1A/EREG	28
BP	GO:0032102	negative regulation of response to external stimulus	2.58157e-09	8.01306e-08	PLAU/SEMA7A/ANXA2/WNT5A/CEACAM1/PLAT/KLKB1/GREM1/FAP/NT5E/MMP12/HLA-B/HLA-A/PPARG/PTGER4/PLAUR/NMI/ANGPT2/ALOX5/TNFAIP6/ROBO1/HTRA1/IFI16/APOH/TFPI/SERPINB2/TNFAIP3/HLA-DRB1/SPP1/CCL2/MMRN1/THBS1/SERPINE1	33
MF	GO:0017171	serine hydrolase activity	1.8029e-09	8.11304e-08	TMPRSS4/PLAU/MMP14/MMP11/PLAT/KLKB1/FAP/MMP12/HPN/HTRA3/MMP9/CTSK/BMP1/MMP3/MMP13/HTRA1/MMP2/MMP1/MMP7/C1S/C1R/PRSS2	22
BP	GO:0061045	negative regulation of wound healing	2.6919e-09	8.30091e-08	PLAU/ANXA2/CEACAM1/PLAT/KLKB1/FAP/PLAUR/ALOX5/APOH/TFPI/SERPINB2/MMRN1/THBS1/SERPINE1	14
BP	GO:0051917	regulation of fibrinolysis	2.73439e-09	8.37717e-08	PLAU/PLAT/KLKB1/FAP/PLAUR/APOH/THBS1/SERPINE1	8
BP	GO:0050819	negative regulation of coagulation	2.85706e-09	8.69653e-08	PLAU/ANXA2/CEACAM1/PLAT/KLKB1/FAP/PLAUR/APOH/TFPI/SERPINB2/THBS1/SERPINE1	12
BP	GO:0007565	female pregnancy	3.02844e-09	9.15909e-08	SLC2A1/ITGA2/ITGA3/IGFBP5/CTSB/PRDM1/BMPR2/MMP9/TIMP1/IGFBP7/ANGPT2/IGFBP2/LIF/MMP2/IDO1/ITGA5/ITGB3/ADM/SPP1/FOSB/PTGS2	21
BP	GO:0060840	artery development	3.20302e-09	9.62537e-08	EDNRA/EFNB2/PROX1/COMP/PRDM1/LOXL1/COL3A1/BMPR2/PDGFRB/MYLK/ROBO1/PRRX1/TGFBR1/LRP1/LOX/TGFB2	16
BP	GO:0051302	regulation of cell division	3.33318e-09	9.91407e-08	ECT2/SFN/BCL2L1/RACGAP1/KIF23/CIT/PRC1/ASPM/PDGFC/E2F7/BRCA2/CDC6/MYC/KIF14/SFRP2/MACC1/IL1A/TGFB2/PAX6/TP63/EREG	21
BP	GO:0016052	carbohydrate catabolic process	3.34111e-09	9.91407e-08	PYGB/PKM/HK2/ENO2/PGK1/GALE/HK1/GAPDH/PFKP/LDHA/PSEN1/PGM2/SLC25A12/ENO1/ALDOC/GPI/PYGL/SLC4A4/HIF1A	19
CC	GO:0030669	clathrin-coated endocytic vesicle membrane	5.43957e-09	1.00572e-07	WNT5A/EGF/HLA-DRA/HLA-DQB1/AREG/TFRC/CD74/HLA-DQA1/EREG/HLA-DPA1/CFTR/HLA-DRB1/IL7R	13
CC	GO:0031528	microvillus membrane	5.50394e-09	1.00572e-07	SLC6A6/CEACAM1/EZR/CTNNB1/ITGAV/PDPN/MSN/CA9/ITGB3	9
MF	GO:0048018	receptor ligand activity	2.44966e-09	1.03345e-07	LGALS3/EFNA5/SEMA7A/TNFSF4/WNT5A/INHBA/GREM1/CXCL12/CXCL5/PDGFC/CCL20/DKK1/IL18/BMP1/GPI/EGF/FBN1/TIMP1/WNT2/TNFRSF11B/SFRP2/LIF/KITLG/MACC1/AREG/CXCL10/IL1A/TNFSF10/CCL18/CXCL14/TGFB2/EREG/CXCL8/ADM/SPP1/CCL2	36
BP	GO:0006090	pyruvate metabolic process	3.68142e-09	1.08556e-07	PKM/HK2/ENO2/PGK1/HK1/GAPDH/PFKP/LDHA/PDK4/PSEN1/ENO1/ALDOC/GPI/SLC4A4/HIF1A/NR4A3	16
BP	GO:0061564	axon development	3.80665e-09	1.11552e-07	LAMC2/LAMA3/FN1/EFNA5/SEMA7A/CDH11/EDNRA/EFNB2/CTTN/WNT5A/ITGB1/ETV1/PSEN1/EPHA2/CXCL12/KLF7/APLP1/FLNA/SKIL/PAK1/NFIB/BMPR2/NTRK2/CDH2/TNFRSF21/DHFR/EFNA1/ROBO1/THY1/MMP2/CRABP2/PAX6/SPP1/TNC/NR4A2	35
BP	GO:0019883	antigen processing and presentation of endogenous antigen	3.83078e-09	1.11566e-07	TAP1/TAP2/HLA-C/HLA-B/HLA-A/AZGP1/HLA-DRA/CD74/HLA-DRB1	9
BP	GO:1903035	negative regulation of response to wounding	3.97426e-09	1.15034e-07	PLAU/ANXA2/CEACAM1/PLAT/KLKB1/FAP/PLAUR/ALOX5/APOH/TFPI/SERPINB2/SPP1/MMRN1/THBS1/SERPINE1	15
BP	GO:0016049	cell growth	4.45705e-09	1.28222e-07	FN1/EFNA5/IGFBP3/SEMA7A/SFN/MMP14/EDNRA/SPOCK1/PML/CTTN/DCBLD2/WNT5A/CEACAM1/ITGB1/INHBA/GREM1/IGFBP5/CXCL12/CTNNB1/HPN/ENO1/BMPR2/KIF14/BST2/IGFBP7/GATA4/SFRP2/TGFBR1/CRABP2/TGFB2/NEDD4L/PRSS2/SPP1/TNC/SFRP1	35
MF	GO:0001618	virus receptor activity	3.29027e-09	1.30643e-07	ITGA2/CD55/EFNB2/ITGB5/ITGB1/EPHA2/ITGAV/ANPEP/CD80/CDK1/MRC1/TFRC/ITGA5/ITGB3	14
CC	GO:0071556	integral component of lumenal side of endoplasmic reticulum membrane	7.82567e-09	1.3108e-07	HLA-C/HLA-B/HLA-A/HLA-DRA/HLA-DQB1/CD74/HLA-DQA1/HLA-DPA1/HLA-DRB1	9
CC	GO:0098553	lumenal side of endoplasmic reticulum membrane	7.82567e-09	1.3108e-07	HLA-C/HLA-B/HLA-A/HLA-DRA/HLA-DQB1/CD74/HLA-DQA1/HLA-DPA1/HLA-DRB1	9
BP	GO:0002483	antigen processing and presentation of endogenous peptide antigen	4.62792e-09	1.3233e-07	TAP1/TAP2/HLA-C/HLA-B/HLA-A/AZGP1/HLA-DRA/HLA-DRB1	8
BP	GO:0010632	regulation of epithelial cell migration	4.82633e-09	1.37172e-07	ITGA2/ITGA3/MET/WNT5A/CEACAM1/PROX1/EPHA2/SRPX2/BMPR2/PPARG/MMP9/SPARC/GPI/CORO1C/EGF/EFNA1/ANGPT2/ANXA1/RAB25/APOH/ITGB3/TGFB2/HIF1A/DCN/THBS1/PTGS2	26
MF	GO:0046332	SMAD binding	3.92396e-09	1.39404e-07	PML/ACVR1/CTNNB1/COL5A2/PMEPA1/COL1A2/SKIL/COL3A1/PPARG/GATA4/TGFBR1/TGFBR3/PAX6/ANKRD1	14
MF	GO:0140272	exogenous protein binding	3.92396e-09	1.39404e-07	ITGA2/CD55/EFNB2/ITGB5/ITGB1/EPHA2/ITGAV/ANPEP/CD80/CDK1/MRC1/TFRC/ITGA5/ITGB3	14
BP	GO:0090596	sensory organ morphogenesis	5.03748e-09	1.42316e-07	COL11A1/CTHRC1/EDNRA/PRKCI/COL8A1/WNT5A/PROX1/EPHA2/CTNNB1/COL5A2/HPN/COL5A1/PRDM1/ZEB1/AQP1/PTK7/NTRK2/FBN1/WNT2/PRRX1/THY1/MFAP5/LRIG1/PAX6/HIF1A	25
CC	GO:0045334	clathrin-coated endocytic vesicle	1.05278e-08	1.69288e-07	CEMIP/WNT5A/EGF/HLA-DRA/HLA-DQB1/AREG/TFRC/CD74/HLA-DQA1/EREG/HLA-DPA1/CFTR/HLA-DRB1/IL7R	14
BP	GO:0006096	glycolytic process	6.25982e-09	1.75797e-07	PKM/HK2/ENO2/PGK1/HK1/GAPDH/PFKP/LDHA/PSEN1/ENO1/ALDOC/GPI/SLC4A4/HIF1A	14
BP	GO:0030900	forebrain development	6.37419e-09	1.77949e-07	SLC2A1/LEF1/SEMA7A/ERBB4/BTG2/WNT5A/PROX1/INHBA/PSEN1/CXCL12/CTNNB1/ASPM/APLP1/DKK1/STIL/COL3A1/SRGAP2C/NFIB/SLC1A2/KIF14/ZEB1/AQP1/NTRK2/CDH2/BNIP3/ROBO1/LAMB1/PAX6/HIF1A/NR4A2	30
BP	GO:0030193	regulation of blood coagulation	6.46886e-09	1.7953e-07	PLAU/ANXA2/F2R/CEACAM1/PLAT/KLKB1/FAP/PLAUR/APOH/TFPI/SERPINB2/THBS1/SERPINE1	13
BP	GO:0007179	transforming growth factor beta receptor signaling pathway	6.52049e-09	1.79904e-07	FERMT1/ITGA3/PML/ITGB5/ACVR1/PMEPA1/COL1A2/HTRA3/SKIL/ID1/COL3A1/ASPN/PPARG/ZEB1/FBN1/ITGB8/HTRA1/TGFBR1/LOX/TGFBR3/TGFB2/THBS1	22
BP	GO:0030099	myeloid cell differentiation	6.86755e-09	1.88378e-07	LEF1/ANXA2/PML/CEACAM1/RUNX1/INHBA/PSEN1/EPHA2/CTNNB1/STAT1/FLNA/MYC/PPARG/MMP9/FBN1/ITGB8/TNFRSF11B/TNFAIP6/MYH9/LIF/IFI16/KITLG/LOX/TGFBR3/GPC3/TFRC/CD74/HIF1A/HLA-DRB1/NCKAP1L/SFRP1	31
BP	GO:0006757	ATP generation from ADP	7.35538e-09	2.00593e-07	PKM/HK2/ENO2/PGK1/HK1/GAPDH/PFKP/LDHA/PSEN1/ENO1/ALDOC/GPI/SLC4A4/HIF1A	14
BP	GO:0006898	receptor-mediated endocytosis	7.5091e-09	2.03609e-07	SDC1/ANXA2/EFNB2/RALA/CTTN/CEACAM1/ITGB1/EZR/GREM1/ITGAV/CLU/VLDLR/DKK1/EGF/MARCO/LRP1/MRC1/TFRC/ITGB3/MSR1/SFRP4/CXCL8/ADM/SERPINE1	24
BP	GO:0001935	endothelial cell proliferation	7.67842e-09	2.0701e-07	SULF1/MMP14/WNT5A/PROX1/LOXL2/ECM1/EPHA2/CXCL12/STAT1/BMPR2/PPARG/SPARC/EGF/WNT2/ALOX5/TGFBR1/APOH/ITGB3/HIF1A/CCL2/THBS1	21
BP	GO:0003007	heart morphogenesis	8.10505e-09	2.17271e-07	COL11A1/EDNRA/WNT5A/PROX1/ACVR1/PSEN1/CTNNB1/FHL2/COL5A1/DKK1/FLNA/STIL/PDCD4/BMPR2/WNT2/EFNA1/ROBO1/GATA4/SFRP2/TGFBR1/TGFBR3/TGFB2/HIF1A/ANKRD1	24
BP	GO:0009185	ribonucleoside diphosphate metabolic process	8.21642e-09	2.19012e-07	PKM/HK2/ENO2/PGK1/HK1/GAPDH/PFKP/LDHA/PSEN1/AK4/NT5E/ENO1/ALDOC/GPI/SLC4A4/HIF1A	16
CC	GO:0034774	secretory granule lumen	1.4798e-08	2.22753e-07	PYGB/FN1/PKM/ANXA2/PLAC8/ECM1/PGM2/CLU/ALDOC/LYZ/TIMP2/SPARC/TUBB/GPI/EGF/TIMP1/PRDX4/ALOX5/APOH/RARRES2/PYGL/TGFB2/PRSS2/MMRN1/THBS1/SERPINE1	26
CC	GO:0016324	apical plasma membrane	1.4961e-08	2.22753e-07	SLC2A1/CEACAM5/FN1/SLC16A3/SLC6A6/PRKCI/CEACAM1/EZR/PSEN1/ASPM/HPN/CTSB/CTSK/BST2/AQP1/CDH2/PDGFRB/PDPN/MSN/ANXA1/IGFBP2/THY1/OSMR/MUC1/ITGB3/DDR2/CFTR/EPCAM	28
BP	GO:0008584	male gonad development	8.82706e-09	2.33967e-07	SDC1/MMP14/WNT5A/BCL2L1/INHBA/ASPM/BRIP1/PDGFRB/PRDX4/GATA4/SFRP2/TGFBR1/KITLG/IL1A/TNFSF10/TGFB2/SFRP1/CYP1B1	18
BP	GO:1903317	regulation of protein maturation	9.26652e-09	2.44243e-07	PLAU/ANXA2/MMP14/RUNX1/RASAL2/PLAT/KLKB1/HPN/ENO1/PLAUR/MYH9/THBS1/SERPINE1	13
BP	GO:0006165	nucleoside diphosphate phosphorylation	9.54454e-09	2.50173e-07	PKM/HK2/ENO2/PGK1/HK1/GAPDH/PFKP/LDHA/PSEN1/AK4/ENO1/ALDOC/GPI/SLC4A4/HIF1A	15
BP	GO:1903706	regulation of hemopoiesis	9.68351e-09	2.52413e-07	LEF1/MMP14/FANCD2/TNFSF4/CEACAM1/RUNX1/INHBA/CTNNB1/CD80/STAT1/PRDM1/HLA-B/IL18/MYC/ZEB1/XBP1/FBN1/TNFRSF11B/TNFAIP6/ANXA1/LIF/KITLG/LOX/HLA-DRA/CD74/HIF1A/HLA-DRB1/NCKAP1L/SFRP1/VNN1/IL7R	31
BP	GO:0046546	development of primary male sexual characteristics	9.83855e-09	2.55045e-07	SDC1/MMP14/WNT5A/BCL2L1/INHBA/ASPM/BRIP1/PDGFRB/PRDX4/GATA4/SFRP2/TGFBR1/KITLG/IL1A/TNFSF10/TGFB2/SFRP1/CYP1B1	18
CC	GO:0060205	cytoplasmic vesicle lumen	1.78942e-08	2.56909e-07	PYGB/FN1/PKM/ANXA2/PLAC8/ECM1/PGM2/CLU/ALDOC/LYZ/TIMP2/SPARC/TUBB/GPI/EGF/TIMP1/PRDX4/ALOX5/APOH/RARRES2/PYGL/TGFB2/PRSS2/MMRN1/THBS1/SERPINE1	26
CC	GO:0031983	vesicle lumen	2.02832e-08	2.81167e-07	PYGB/FN1/PKM/ANXA2/PLAC8/ECM1/PGM2/CLU/ALDOC/LYZ/TIMP2/SPARC/TUBB/GPI/EGF/TIMP1/PRDX4/ALOX5/APOH/RARRES2/PYGL/TGFB2/PRSS2/MMRN1/THBS1/SERPINE1	26
BP	GO:0046939	nucleotide phosphorylation	1.25992e-08	3.24824e-07	PKM/HK2/ENO2/PGK1/HK1/GAPDH/PFKP/LDHA/PSEN1/AK4/ENO1/ALDOC/GPI/SLC4A4/HIF1A	15
BP	GO:0001707	mesoderm formation	1.31151e-08	3.36288e-07	ITGA2/LEF1/ITGA3/WNT5A/ITGB1/ACVR1/INHBA/EPHA2/DKK1/BMPR2/GPI/SFRP2/ITGB3	13
MF	GO:0042605	peptide antigen binding	1.03913e-08	3.37668e-07	TAP1/TAP2/HLA-C/HLA-B/HLA-A/HLA-DRA/HLA-DQB1/HLA-DQA1/HLA-DPA1/HLA-DRB1	10
MF	GO:0043236	laminin binding	1.05052e-08	3.37668e-07	ITGA2/LGALS3/ITGA3/ITGB1/ECM1/TINAGL1/LRRC15/LGALS1/THBS1	9
BP	GO:0007088	regulation of mitotic nuclear division	1.36346e-08	3.47719e-07	CENPF/CCNB1/MKI67/RAD21/DLGAP5/BUB1/NEK2/NDC80/CHEK1/TRIP13/NUF2/PDGFRB/EGF/BUB1B/IL1A/EREG	16
BP	GO:0007568	aging	1.41727e-08	3.59499e-07	EDNRA/LOXL2/INHBA/IGFBP5/COMP/SLC1A2/KRT14/COL4A2/PDGFRB/TIMP1/TYMS/IGFBP2/MMP2/CD68/TFRC/TP63/ADM/MME/PTGS2	19
BP	GO:0042476	odontogenesis	1.49669e-08	3.77613e-07	LEF1/RUNX2/SDC1/INHBA/CTNNB1/COL1A2/COL1A1/ASPN/AQP1/TNFRSF11B/LAMB1/HTRA1/TGFB2/TP63/CFTR/ADM/SERPINE1	17
BP	GO:0035904	aorta development	1.52222e-08	3.79991e-07	EDNRA/EFNB2/PROX1/PRDM1/LOXL1/COL3A1/PDGFRB/MYLK/ROBO1/LRP1/LOX/TGFB2	12
BP	GO:0090303	positive regulation of wound healing	1.52222e-08	3.79991e-07	FERMT1/PLAU/F2R/ITGB1/PLAT/XBP1/MYLK/ANXA1/APOH/DDR2/THBS1/SERPINE1	12
BP	GO:0034599	cellular response to oxidative stress	1.59692e-08	3.95255e-07	ECT2/MET/EDNRA/PML/FANCD2/MELK/CTNNB1/MMP9/AQP1/BNIP3/DHFR/CDK1/MMP3/TXN/ALOX5/ANXA1/GATA4/MMP2/DDR2/HIF1A/TNFAIP3/CYP1B1/VNN1/NR4A3/NR4A2	25
BP	GO:0001558	regulation of cell growth	1.60012e-08	3.95255e-07	FN1/EFNA5/IGFBP3/SEMA7A/SFN/MMP14/SPOCK1/PML/CTTN/DCBLD2/WNT5A/CEACAM1/INHBA/GREM1/IGFBP5/CXCL12/HPN/ENO1/BMPR2/KIF14/BST2/IGFBP7/SFRP2/TGFBR1/CRABP2/TGFB2/NEDD4L/PRSS2/SPP1/TNC/SFRP1	31
BP	GO:0010975	regulation of neuron projection development	1.63389e-08	4.01494e-07	FN1/EFNA5/SEMA7A/ITGA3/EFNB2/PRKCI/SPOCK1/WNT5A/PSEN1/CXCL12/DPYSL3/VLDLR/DKK1/FLNA/SKIL/PAK1/ID1/BMPR2/PTK7/NTRK2/CDH2/ITGA6/EFNA1/ROBO1/SFRP2/PRRX1/ENC1/THY1/CRABP2/NEDD4L/SPP1/SFRP1	32
BP	GO:0046661	male sex differentiation	1.7205e-08	4.20585e-07	SDC1/MMP14/WNT5A/BCL2L1/INHBA/CTNNB1/ASPM/BRIP1/PDGFRB/PRDX4/GATA4/SFRP2/TGFBR1/KITLG/IL1A/TNFSF10/TGFB2/SFRP1/CYP1B1	19
BP	GO:0002478	antigen processing and presentation of exogenous peptide antigen	1.79371e-08	4.36223e-07	TAP1/TAP2/HLA-A/HLA-DRA/HLA-DQB1/IFI30/CD74/HLA-DQA1/HLA-DPA1/HLA-DRB1	10
BP	GO:0044703	multi-organism reproductive process	1.83523e-08	4.41774e-07	SLC2A1/ITGA2/ITGA3/IGFBP5/CTSB/PRDM1/BMPR2/MMP9/TIMP1/IGFBP7/ANGPT2/IGFBP2/LIF/MMP2/IDO1/ITGA5/ITGB3/ADM/SPP1/FOSB/PTGS2	21
BP	GO:0048332	mesoderm morphogenesis	1.83526e-08	4.41774e-07	ITGA2/LEF1/ITGA3/WNT5A/ITGB1/ACVR1/INHBA/EPHA2/DKK1/BMPR2/GPI/SFRP2/ITGB3	13
BP	GO:0044772	mitotic cell cycle phase transition	1.91068e-08	4.57594e-07	ANLN/PML/CENPF/ITGB1/ACVR1/MELK/INHBA/CCNB1/RAD21/DLGAP5/CIT/BUB1/CCNB2/E2F7/NDC80/CHEK1/STIL/TRIP13/CDC6/DTL/NUF2/MYC/CCNA2/KIF14/UBE2C/CDK1/BUB1B/ANXA1/MUC1/CKS2/DDR2/WEE1/CCL2	33
BP	GO:0071214	cellular response to abiotic stimulus	2.04487e-08	4.8481e-07	SLC2A1/ITGA2/ECT2/BCL2L1/CRIP1/COL1A1/CHEK1/RAD51AP1/BRCA2/MYC/MMP9/PTGER4/AQP1/BNIP3/MYLK/TIMP1/MMP3/SFRP2/FAS/MMP2/IFI16/MMP1/ITGB3/ANKRD1/MME/SFRP1/PTGS2	27
BP	GO:0104004	cellular response to environmental stimulus	2.04487e-08	4.8481e-07	SLC2A1/ITGA2/ECT2/BCL2L1/CRIP1/COL1A1/CHEK1/RAD51AP1/BRCA2/MYC/MMP9/PTGER4/AQP1/BNIP3/MYLK/TIMP1/MMP3/SFRP2/FAS/MMP2/IFI16/MMP1/ITGB3/ANKRD1/MME/SFRP1/PTGS2	27
BP	GO:1903829	positive regulation of protein localization	2.12632e-08	5.01598e-07	LGALS3/ECT2/AGR2/CEMIP/ITGA3/SFN/PRKCI/ERBB4/WNT5A/ITGB1/EZR/PSEN1/EPHA2/ATP2C1/FLNA/NDC80/PPARG/GPSM2/EGF/CDK1/MSN/TNFAIP6/LIF/LRP1/IL1A/TFRC/TGFB2/HIF1A/ANKRD1/CFTR/HLA-DRB1/PTGS2	32
BP	GO:1903036	positive regulation of response to wounding	2.16223e-08	5.07532e-07	FERMT1/PLAU/F2R/ITGB1/PLAT/FLNA/XBP1/MYLK/ANXA1/APOH/DDR2/THBS1/SERPINE1	13
BP	GO:0045786	negative regulation of cell cycle	2.2761e-08	5.31615e-07	PML/FANCD2/BTG2/CENPF/PROX1/ACVR1/INHBA/CCNB1/HHEX/RAD21/CTNNB1/BUB1/NEK2/E2F7/NDC80/CHEK1/TRIP13/BRCA2/CDC6/DTL/NUF2/BRIP1/CDK1/BUB1B/LIF/MUC1/WEE1/TNFAIP3/CCL2/PTGS2	30
CC	GO:0016323	basolateral plasma membrane	4.23348e-08	5.67287e-07	SLC2A1/CEACAM5/SLC16A3/ITGA3/SLC6A6/ANXA2/ERBB4/EZR/CTNNB1/AQP1/CDH2/PDPN/MSN/ANXA1/CA9/LRP1/SLC4A4/TFRC/CDH17/EPCAM/AQP9	21
BP	GO:0048754	branching morphogenesis of an epithelial tube	2.50894e-08	5.81341e-07	LEF1/MET/MMP14/EDNRA/PML/WNT5A/ACVR1/GREM1/EPHA2/CTNNB1/PAK1/MYC/EGF/WNT2/SFRP2/COL4A1/GPC3/AREG	18
BP	GO:0048660	regulation of smooth muscle cell proliferation	2.51364e-08	5.81341e-07	ITGA2/IGFBP3/IGFBP5/CTNNB1/STAT1/PDCD4/IL18/BMPR2/PPARG/MMP9/PDGFRB/MMP2/ITGB3/DDR2/EREG/TNFAIP3/THBS1/PTGS2/NR4A3	19
BP	GO:0008406	gonad development	2.61479e-08	5.9752e-07	SDC1/MMP14/WNT5A/BCL2L1/INHBA/ASPM/BRCA2/BRIP1/PDGFRB/PRDX4/TNFAIP6/GATA4/SFRP2/TGFBR1/MMP2/KITLG/IL1A/TNFSF10/TGFB2/EREG/SFRP1/CYP1B1	22
BP	GO:0060348	bone development	2.61479e-08	5.9752e-07	SULF1/RUNX2/ANXA2/MMP14/TGM2/PLS3/ECM1/GREM1/BGN/PDGFC/COL1A1/COMP/FLNA/COL3A1/BMPR2/PTGER4/FBN1/SERPINH1/MMP13/LOX/SFRP4/DDR2	22
BP	GO:0048545	response to steroid hormone	2.62159e-08	5.9752e-07	SDC1/ACVR1/PLAT/PMEPA1/COL1A1/PAK1/AQP1/GPI/IGFBP7/TYMS/FIBIN/ANXA1/IGFBP2/TFPI/LOX/AREG/CYBB/TGFB2/TP63/ADM/SPP1/FOSB/SFRP1/CYP1B1/THBS1/PTGS2/NR4A3	27
BP	GO:0009410	response to xenobiotic stimulus	2.74647e-08	6.22972e-07	ITGA2/ITGA3/ENO2/CENPF/INHBA/CTNNB1/AHR/COL1A1/STAT1/MYC/SLC1A2/CDK1/TYMS/TNFRSF11B/CA9/IGFBP2/GATA4/SFRP2/MMP2/LOX/TFRC/CYBB/ITGB3/TGFB2/ANKRD1/FOSB/NCKAP1L/SFRP1/CYP1B1/THBS1/PTGS2	31
BP	GO:0019882	antigen processing and presentation	2.78707e-08	6.29158e-07	TAP1/TAP2/HLA-C/HLA-B/HLA-A/CD68/AZGP1/HLA-DRA/HLA-DQB1/IFI30/CD74/HLA-DQA1/HLA-DPA1/HLA-DRB1/THBS1	15
CC	GO:0098576	lumenal side of membrane	4.90492e-08	6.36057e-07	HLA-C/HLA-B/HLA-A/HLA-DRA/HLA-DQB1/CD74/HLA-DQA1/HLA-DPA1/HLA-DRB1	9
BP	GO:0048844	artery morphogenesis	2.97821e-08	6.66152e-07	EDNRA/EFNB2/PROX1/COMP/PRDM1/COL3A1/BMPR2/PDGFRB/MYLK/PRRX1/TGFBR1/LRP1/TGFB2	13
BP	GO:0071604	transforming growth factor beta production	2.98756e-08	6.66152e-07	FERMT1/FN1/ITGAV/COL3A1/LUM/ITGB8/TGFB2/HIF1A/THBS1/PTGS2	10
BP	GO:0060326	cell chemotaxis	2.99331e-08	6.66152e-07	LGALS3/LEF1/MET/WNT5A/GREM1/EPHA2/CXCL12/CXCL5/CCL20/PDGFRB/ALOX5/TNFAIP6/ANXA1/MMP2/LOX/RARRES2/CXCL10/CCL18/CXCL14/CD74/TGFB2/CXCL8/NCKAP1L/CCL2/THBS1/SERPINE1	26
BP	GO:0048592	eye morphogenesis	3.06053e-08	6.77914e-07	PRKCI/COL8A1/WNT5A/PROX1/EPHA2/CTNNB1/COL5A2/COL5A1/PRDM1/ZEB1/AQP1/NTRK2/FBN1/WNT2/THY1/MFAP5/PAX6/HIF1A	18
BP	GO:0097193	intrinsic apoptotic signaling pathway	3.14478e-08	6.93322e-07	SFN/PML/BCL2L1/MELK/EPHA2/CXCL12/CRIP1/CLU/ENO1/SKIL/BRCA2/MYC/MMP9/PLAUR/XBP1/BNIP3/SFRP2/IFI16/MUC1/CD74/HIF1A/TP63/CYP1B1/PTGS2/VNN1	25
BP	GO:0006735	NADH regeneration	3.21414e-08	6.98816e-07	PKM/HK2/ENO2/PGK1/HK1/PFKP/ENO1	7
BP	GO:0061621	canonical glycolysis	3.21414e-08	6.98816e-07	PKM/HK2/ENO2/PGK1/HK1/PFKP/ENO1	7
BP	GO:0061718	glucose catabolic process to pyruvate	3.21414e-08	6.98816e-07	PKM/HK2/ENO2/PGK1/HK1/PFKP/ENO1	7
BP	GO:0098813	nuclear chromosome segregation	3.39751e-08	7.35296e-07	ECT2/FANCD2/CENPF/RACGAP1/TOP2A/KIF23/CCNB1/RAD21/DLGAP5/CTNNB1/PRC1/SMC4/BUB1/FAM83D/NEK2/NDC80/TRIP13/CDC6/NUF2/BRIP1/KIF14/UBE2C/KIF11/KIF4A/BUB1B/GEM	26
BP	GO:0048659	smooth muscle cell proliferation	3.63202e-08	7.82459e-07	ITGA2/IGFBP3/IGFBP5/CTNNB1/STAT1/PDCD4/IL18/BMPR2/PPARG/MMP9/PDGFRB/MMP2/ITGB3/DDR2/EREG/TNFAIP3/THBS1/PTGS2/NR4A3	19
BP	GO:0070613	regulation of protein processing	3.80682e-08	8.12635e-07	PLAU/ANXA2/MMP14/RUNX1/PLAT/KLKB1/HPN/ENO1/PLAUR/MYH9/THBS1/SERPINE1	12
BP	GO:0045137	development of primary sexual characteristics	3.83523e-08	8.12635e-07	SDC1/MMP14/WNT5A/BCL2L1/INHBA/ASPM/BRCA2/BRIP1/PDGFRB/PRDX4/TNFAIP6/GATA4/SFRP2/TGFBR1/MMP2/KITLG/IL1A/TNFSF10/TGFB2/EREG/SFRP1/CYP1B1	22
BP	GO:0030336	negative regulation of cell migration	3.83993e-08	8.12635e-07	SULF1/IGFBP3/GREM1/IGFBP5/CXCL12/DPYSL3/COL3A1/SRGAP2C/PPARG/PTGER4/BST2/CORO1C/TIMP1/ANGPT2/TNFAIP6/ROBO1/SFRP2/IFITM1/THY1/LRP1/APOH/CD74/DCN/CCL2/SFRP1/CYP1B1/THBS1/SERPINE1	28
BP	GO:0044706	multi-multicellular organism process	3.84099e-08	8.12635e-07	SLC2A1/ITGA2/ITGA3/IGFBP5/CTSB/PRDM1/BMPR2/MMP9/TIMP1/IGFBP7/ANGPT2/IGFBP2/LIF/MMP2/IDO1/ITGA5/ITGB3/ADM/SPP1/FOSB/PTGS2	21
BP	GO:0110148	biomineralization	4.3485e-08	9.15902e-07	ACVR1/ECM1/GREM1/NT5E/SLC20A1/COL1A2/COL1A1/COMP/ASPN/BMPR2/ALOX5/MMP13/LOX/GPC3/DDR2/HIF1A/CFTR/SPP1/PTGS2	19
BP	GO:0046683	response to organophosphorus	4.42452e-08	9.27773e-07	SDC1/PLAT/EZR/IGFBP5/NT5E/AHR/COL1A1/STAT1/AQP1/TYMS/AREG/CFTR/FOSB/CYP1B1/PTGS2/AQP9	16
CC	GO:0005775	vacuolar lumen	7.55695e-08	9.49342e-07	PYGB/SDC1/ANXA2/PLAC8/VCAN/BGN/CTSB/LYZ/CTSK/TUBB/PDGFRB/LUM/SDC4/GPC3/IFI30/CD74/PRSS2/DCN	18
BP	GO:0042129	regulation of T cell proliferation	4.7535e-08	9.92347e-07	LGALS3/CD55/TNFSF4/CTNNB1/CD80/IL18/HLA-A/TNFRSF21/PDCD1LG2/ANXA1/IGFBP2/IDO1/KITLG/SDC4/IL1A/TFRC/HLA-DPA1/HLA-DRB1/NCKAP1L	19
BP	GO:0048738	cardiac muscle tissue development	4.80143e-08	9.97936e-07	NOX4/COL11A1/EDNRA/EFNB2/ERBB4/WNT5A/RUNX1/ITGB1/PROX1/ACVR1/GREM1/FHL2/DKK1/SGCB/PDGFRB/CDK1/WNT2/GATA4/TGFBR1/TGFBR3/TGFB2/ANKRD1	22
BP	GO:0040013	negative regulation of locomotion	4.8645e-08	1.00661e-06	SULF1/IGFBP3/SEMA7A/WNT5A/GREM1/IGFBP5/CXCL12/DPYSL3/COL3A1/SRGAP2C/PPARG/PTGER4/BST2/CORO1C/TIMP1/ANGPT2/TNFAIP6/ROBO1/SFRP2/IFITM1/THY1/LRP1/APOH/CD74/DCN/CCL2/SFRP1/CYP1B1/THBS1/SERPINE1	30
BP	GO:0097529	myeloid leukocyte migration	5.17053e-08	1.06526e-06	LGALS3/MMP14/GREM1/CXCL12/CXCL5/CCL20/PTGER4/TNFAIP6/ANXA1/MMP2/KITLG/RARRES2/CXCL10/IL1A/CCL18/CD74/TGFB2/CXCL8/NCKAP1L/CCL2/THBS1/SERPINE1	22
BP	GO:0071496	cellular response to external stimulus	5.24795e-08	1.07651e-06	SLC2A1/ITGA2/POSTN/PDK4/NUAK1/EIF2AK2/COL1A1/CHEK1/BMPR2/BRIP1/SLC1A2/CTSK/PTGER4/AQP1/XBP1/BNIP3/SFRP2/FAS/IFI16/CD68/ITGB3/DSC2/ANKRD1/SFRP1/PTGS2/NR4A2	26
BP	GO:1904948	midbrain dopaminergic neuron differentiation	5.35552e-08	1.09382e-06	WNT5A/CTNNB1/DKK1/WNT2/SFRP2/SFRP1/NR4A2	7
BP	GO:0032944	regulation of mononuclear cell proliferation	5.56571e-08	1.13185e-06	LGALS3/CD55/TNFSF4/BCL2L1/CTNNB1/AHR/CD80/IL18/HLA-A/TNFRSF21/PDCD1LG2/ANXA1/IGFBP2/IDO1/KITLG/SDC4/IL1A/TFRC/CD74/HLA-DPA1/HLA-DRB1/NCKAP1L	22
BP	GO:0060537	muscle tissue development	5.69699e-08	1.15358e-06	NOX4/COL11A1/LEF1/EDNRA/EFNB2/ERBB4/BTG2/WNT5A/RUNX1/CENPF/ITGB1/PROX1/ACVR1/GREM1/IGFBP5/CTNNB1/FHL2/DKK1/COL3A1/SGCB/PDGFRB/MYLK/CDK1/WNT2/GATA4/TGFBR1/LOX/TGFBR3/TGFB2/ANKRD1	30
BP	GO:0006007	glucose catabolic process	5.86211e-08	1.18194e-06	PKM/HK2/ENO2/PGK1/HK1/PFKP/SLC25A12/ENO1	8
BP	GO:0002687	positive regulation of leukocyte migration	5.97278e-08	1.19913e-06	ITGA2/LGALS3/MMP14/WNT5A/CXCL12/CCL20/THY1/KITLG/RARRES2/CXCL10/IL1A/CD74/ITGB3/CXCL8/NCKAP1L/THBS1/SERPINE1	17
CC	GO:0031091	platelet alpha granule	1.00525e-07	1.22458e-06	FN1/PCDH7/THBS2/CLU/SPARC/EGF/TIMP1/SERPINA5/ITGB3/TGFB2/MMRN1/THBS1/SERPINE1	13
BP	GO:0097191	extrinsic apoptotic signaling pathway	6.14717e-08	1.22891e-06	LGALS3/PML/CTTN/ACVR1/BCL2L1/INHBA/ITGAV/SKIL/ITGA6/SFRP2/FAS/TGFBR1/KITLG/IL1A/TNFSF10/TGFB2/TNFAIP3/KRT18/SFRP1/THBS1/SERPINE1	21
BP	GO:0071492	cellular response to UV-A	6.17847e-08	1.22996e-06	MMP9/TIMP1/MMP3/MMP2/MMP1/MME	6
BP	GO:0050767	regulation of neurogenesis	6.40032e-08	1.26877e-06	FN1/LEF1/EFNA5/SEMA7A/ANXA2/PRKCI/WNT5A/ITGB1/PROX1/TGM2/BHLHE40/PSEN1/CXCL12/CTNNB1/ASPM/SKIL/ID1/BMPR2/NTRK2/WNT2/ROBO1/LIF/THY1/CRABP2/PAX6/HIF1A/MME/SPP1	28
MF	GO:0005126	cytokine receptor binding	4.24123e-08	1.30129e-06	EFNA5/TNFSF4/ECM1/GREM1/CXCL12/CXCL5/CCL20/STAT1/IL18/LIF/TGFBR1/KITLG/OSMR/TGFBR3/CXCL10/IL1A/TNFSF10/CCL18/CXCL14/ITGA5/ITGB3/TGFB2/CXCL8/CCL2	24
BP	GO:0007548	sex differentiation	6.75478e-08	1.33343e-06	SDC1/MMP14/WNT5A/BCL2L1/INHBA/CTNNB1/ASPM/BRCA2/BRIP1/PDGFRB/PRDX4/TNFAIP6/GATA4/SFRP2/TGFBR1/MMP2/KITLG/IL1A/TNFSF10/TGFB2/TP63/EREG/SFRP1/CYP1B1	24
BP	GO:0009132	nucleoside diphosphate metabolic process	6.86156e-08	1.34887e-06	PKM/HK2/ENO2/PGK1/HK1/GAPDH/PFKP/LDHA/PSEN1/AK4/NT5E/ENO1/ALDOC/GPI/SLC4A4/HIF1A	16
BP	GO:0045930	negative regulation of mitotic cell cycle	6.92502e-08	1.35427e-06	PML/FANCD2/BTG2/CENPF/ACVR1/INHBA/CCNB1/RAD21/CTNNB1/BUB1/E2F7/NDC80/CHEK1/TRIP13/CDC6/DTL/NUF2/CDK1/BUB1B/MUC1/WEE1/CCL2	22
BP	GO:0002696	positive regulation of leukocyte activation	6.94642e-08	1.35427e-06	LEF1/MMP14/CD55/EFNB2/TNFSF4/WNT5A/RUNX1/CD80/IL18/HLA-A/LGALS1/XBP1/PDCD1LG2/ANXA1/IGFBP2/THY1/KITLG/HLA-DRA/HLA-DQB1/IL1A/TFRC/CD74/HLA-DQA1/HLA-DPA1/HLA-DRB1/NCKAP1L/CCL2/THBS1/VNN1/IL7R/NR4A3	31
BP	GO:0030324	lung development	7.35032e-08	1.42151e-06	AGR2/ITGA3/MMP14/WNT5A/PROX1/IGFBP5/MMP12/CTNNB1/COL3A1/NFIB/BMPR2/PTK7/PDGFRB/PDPN/WNT2/LIF/LOX/GPC3/MME	19
BP	GO:0034103	regulation of tissue remodeling	7.35159e-08	1.42151e-06	CEACAM1/RUNX1/PDK4/GREM1/IL18/PPARG/TNFRSF11B/TFRC/ITGB3/DDR2/TNFAIP3/SPP1/SFRP1	13
BP	GO:0032943	mononuclear cell proliferation	7.71732e-08	1.48614e-06	LGALS3/LEF1/CD55/TNFSF4/BCL2L1/CTNNB1/AHR/CD80/IL18/HLA-A/TNFRSF21/PDCD1LG2/MSN/ANXA1/IGFBP2/IDO1/KITLG/SDC4/IL1A/TFRC/CD74/HLA-DPA1/HLA-DRB1/NCKAP1L/IL7R	25
BP	GO:0071456	cellular response to hypoxia	8.04166e-08	1.54058e-06	EGLN3/PGK1/AK4/ENO1/MYC/CCNA2/BRIP1/PPARG/AQP1/BNIP3/HILPDA/NDRG1/CYBB/DDR2/HIF1A/SFRP1/PTGS2	17
BP	GO:1901987	regulation of cell cycle phase transition	8.06537e-08	1.54058e-06	ANLN/PML/FANCD2/CENPF/PROX1/ACVR1/INHBA/CCNB1/RAD21/DLGAP5/BUB1/FAM83D/E2F7/NDC80/CHEK1/STIL/TRIP13/BRCA2/CDC6/DTL/NUF2/BRIP1/KIF14/UBE2C/CDK1/BUB1B/ANXA1/MUC1/DDR2/WEE1/CCL2	31
BP	GO:0007059	chromosome segregation	8.43754e-08	1.60253e-06	ECT2/FANCD2/CENPF/RACGAP1/TOP2A/KIF23/CCNB1/MKI67/RAD21/DLGAP5/CTNNB1/PRC1/SMC4/BUB1/FAM83D/NEK2/NDC80/TRIP13/SMC6/CDC6/NUF2/BRIP1/KIF14/UBE2C/KIF11/KIF4A/BUB1B/GEM	28
BP	GO:0030111	regulation of Wnt signaling pathway	8.49156e-08	1.60253e-06	FERMT1/SULF1/LEF1/ITGA3/CTHRC1/WNT5A/GREM1/PSEN1/HHEX/CTNNB1/ASPM/COL1A1/DKK1/DEPDC1B/PTK7/CDH2/EGF/RNF213/LGR5/IGFBP2/SFRP2/LRP1/GPC3/SFRP4/TNFAIP3/SFRP1	26
BP	GO:0051604	protein maturation	8.49156e-08	1.60253e-06	TMPRSS4/FN1/PLAU/ANXA2/MMP14/PGK1/RUNX1/RASAL2/PLAT/KLKB1/PSEN1/HPN/COMP/FLNA/ENO1/PLAUR/BMP1/SERPINH1/PRDX4/MYH9/IFI16/APOH/C1R/MME/THBS1/SERPINE1	26
CC	GO:0030496	midbody	1.35648e-07	1.60384e-06	SLC2A1/ECT2/CAPG/ANXA2/ANLN/RALA/CENPF/RACGAP1/KIF23/RAD21/CIT/PRC1/ASPM/NEK2/SHCBP1/KIF14/CDK1/KIF4A/GEM	19
BP	GO:0061620	glycolytic process through glucose-6-phosphate	8.58956e-08	1.61456e-06	PKM/HK2/ENO2/PGK1/HK1/PFKP/ENO1	7
BP	GO:2000146	negative regulation of cell motility	8.91143e-08	1.66842e-06	SULF1/IGFBP3/GREM1/IGFBP5/CXCL12/DPYSL3/COL3A1/SRGAP2C/PPARG/PTGER4/BST2/CORO1C/TIMP1/ANGPT2/TNFAIP6/ROBO1/SFRP2/IFITM1/THY1/LRP1/APOH/CD74/DCN/CCL2/SFRP1/CYP1B1/THBS1/SERPINE1	28
BP	GO:0002237	response to molecule of bacterial origin	9.0567e-08	1.68891e-06	CD55/EFNB2/TNFSF4/F2R/WNT5A/CXCL5/CD80/TAP2/LOXL1/PDCD4/IL18/PTGER4/XBP1/PDCD1LG2/IDO1/MRC1/CD68/ABCA1/CXCL10/IL1A/ANKRD1/CXCL8/ADM/TNFAIP3/CCL2/PTGS2/SERPINE1	27
BP	GO:0008630	intrinsic apoptotic signaling pathway in response to DNA damage	9.43759e-08	1.75301e-06	SFN/PML/BCL2L1/EPHA2/CXCL12/CRIP1/CLU/SKIL/BRCA2/SFRP2/IFI16/MUC1/CD74/TP63	14
BP	GO:1901988	negative regulation of cell cycle phase transition	9.75154e-08	1.80423e-06	PML/FANCD2/CENPF/PROX1/ACVR1/INHBA/CCNB1/RAD21/BUB1/E2F7/NDC80/CHEK1/TRIP13/BRCA2/CDC6/DTL/NUF2/BRIP1/CDK1/BUB1B/MUC1/WEE1/CCL2	23
BP	GO:0048562	embryonic organ morphogenesis	9.95632e-08	1.83492e-06	COL11A1/RUNX2/CTHRC1/MMP14/EDNRA/WNT5A/PROX1/ACVR1/PSEN1/EPHA2/CTNNB1/HPN/STIL/ZEB1/PTK7/FBN1/EFNA1/GATA4/PRRX1/TGFBR1/MFAP5/LRIG1/PAX6/HIF1A	24
BP	GO:0032496	response to lipopolysaccharide	1.01288e-07	1.85945e-06	CD55/EFNB2/TNFSF4/F2R/WNT5A/CXCL5/CD80/LOXL1/PDCD4/IL18/PTGER4/XBP1/PDCD1LG2/IDO1/MRC1/CD68/ABCA1/CXCL10/IL1A/ANKRD1/CXCL8/ADM/TNFAIP3/CCL2/PTGS2/SERPINE1	26
BP	GO:0030323	respiratory tube development	1.03044e-07	1.88435e-06	AGR2/ITGA3/MMP14/WNT5A/PROX1/IGFBP5/MMP12/CTNNB1/COL3A1/NFIB/BMPR2/PTK7/PDGFRB/PDPN/WNT2/LIF/LOX/GPC3/MME	19
BP	GO:0060541	respiratory system development	1.05972e-07	1.9304e-06	LEF1/AGR2/ITGA3/MMP14/WNT5A/PROX1/IGFBP5/MMP12/CTNNB1/COL3A1/NFIB/BMPR2/PTK7/PDGFRB/PDPN/WNT2/LIF/LOX/GPC3/MME	20
BP	GO:0010948	negative regulation of cell cycle process	1.11473e-07	2.02281e-06	PML/FANCD2/CENPF/PROX1/ACVR1/INHBA/CCNB1/RAD21/BUB1/NEK2/E2F7/NDC80/CHEK1/TRIP13/BRCA2/CDC6/DTL/NUF2/BRIP1/CDK1/BUB1B/LIF/MUC1/WEE1/CCL2	25
BP	GO:0031099	regeneration	1.11962e-07	2.0239e-06	ERBB4/RUNX1/CXCL12/FLNA/CCNA2/DHFR/CDK1/TYMS/ANGPT2/ANXA1/GATA4/PRRX1/THY1/MMP2/TGFBR3/ADM/SPP1/TNC/NR4A3	19
BP	GO:0042098	T cell proliferation	1.14554e-07	2.055e-06	LGALS3/CD55/TNFSF4/CTNNB1/CD80/IL18/HLA-A/TNFRSF21/PDCD1LG2/MSN/ANXA1/IGFBP2/IDO1/KITLG/SDC4/IL1A/TFRC/HLA-DPA1/HLA-DRB1/NCKAP1L	20
BP	GO:1903046	meiotic cell cycle process	1.14554e-07	2.055e-06	EDNRA/FANCD2/WNT5A/TOP2A/RAD21/SMC4/ASPM/BUB1/CCNB2/NDC80/RAD51AP1/TRIP13/BRCA2/NUF2/BRIP1/BUB1B/MYH9/LIF/CKS2/EREG	20
BP	GO:0090288	negative regulation of cellular response to growth factor stimulus	1.16919e-07	2.08948e-06	SULF1/WNT5A/GREM1/HHEX/DKK1/HTRA3/SKIL/PPARG/FBN1/TNFAIP6/SFRP2/HTRA1/DCN/SFRP1/THBS1	15
BP	GO:0035148	tube formation	1.18175e-07	2.09605e-06	CTHRC1/RALA/WNT5A/PROX1/TGM2/GREM1/CTNNB1/STIL/NFIB/PTK7/EGF/SFRP2/SDC4/TGFB2/HIF1A/ADM/SFRP1	17
BP	GO:2001236	regulation of extrinsic apoptotic signaling pathway	1.18175e-07	2.09605e-06	LGALS3/PML/CTTN/ACVR1/BCL2L1/INHBA/ITGAV/SKIL/ITGA6/SFRP2/TGFBR1/IL1A/TNFSF10/TNFAIP3/SFRP1/THBS1/SERPINE1	17
BP	GO:0043589	skin morphogenesis	1.21158e-07	2.14092e-06	ITGA2/PSEN1/COL1A2/COL1A1/ITGA6/TP63	6
MF	GO:0048407	platelet-derived growth factor binding	7.36708e-08	2.16208e-06	COL1A2/COL1A1/COL5A1/COL3A1/PDGFRB/COL4A1	6
BP	GO:0031214	biomineral tissue development	1.23407e-07	2.17252e-06	ACVR1/ECM1/GREM1/SLC20A1/COL1A2/COL1A1/COMP/ASPN/BMPR2/ALOX5/MMP13/LOX/GPC3/DDR2/HIF1A/CFTR/SPP1/PTGS2	18
BP	GO:0030879	mammary gland development	1.28499e-07	2.23374e-06	ITGA2/LEF1/HK2/PML/ERBB4/WNT5A/IGFBP5/EPHA2/BRCA2/XBP1/EGF/WNT2/ROBO1/AREG/HIF1A/ELF3	16
BP	GO:0002709	regulation of T cell mediated immunity	1.28661e-07	2.23374e-06	CD55/TNFSF4/CEACAM1/AHR/TAP2/HLA-B/IL18/HLA-A/AZGP1/HLA-DRA/HLA-DRB1/NCKAP1L/IL7R	13
BP	GO:0046849	bone remodeling	1.28661e-07	2.23374e-06	NOX4/CTHRC1/PDK4/GREM1/EPHA2/CTNNB1/CTSK/TNFRSF11B/TFRC/ITGB3/TNFAIP3/SPP1/SFRP1	13
BP	GO:0007409	axonogenesis	1.28779e-07	2.23374e-06	LAMC2/LAMA3/FN1/EFNA5/SEMA7A/CDH11/EDNRA/EFNB2/CTTN/WNT5A/ITGB1/ETV1/PSEN1/EPHA2/CXCL12/KLF7/APLP1/SKIL/PAK1/NFIB/BMPR2/NTRK2/CDH2/EFNA1/ROBO1/THY1/CRABP2/PAX6/SPP1/NR4A2	30
BP	GO:0031623	receptor internalization	1.30682e-07	2.25845e-06	ANXA2/EFNB2/RALA/CEACAM1/ITGB1/EZR/GREM1/DKK1/EGF/LRP1/TFRC/ITGB3/SFRP4/CXCL8/ADM	15
BP	GO:1901991	negative regulation of mitotic cell cycle phase transition	1.31957e-07	2.27216e-06	PML/CENPF/ACVR1/INHBA/CCNB1/RAD21/BUB1/E2F7/NDC80/CHEK1/TRIP13/CDC6/DTL/NUF2/CDK1/BUB1B/MUC1/WEE1/CCL2	19
BP	GO:0061615	glycolytic process through fructose-6-phosphate	1.33302e-07	2.28697e-06	PKM/HK2/ENO2/PGK1/HK1/PFKP/ENO1	7
BP	GO:0071453	cellular response to oxygen levels	1.34674e-07	2.30214e-06	EGLN3/PGK1/AK4/ENO1/MYC/CCNA2/BRIP1/PPARG/AQP1/BNIP3/FAS/HILPDA/NDRG1/CYBB/DDR2/HIF1A/SFRP1/PTGS2	18
BP	GO:0032103	positive regulation of response to external stimulus	1.37754e-07	2.34629e-06	ITGA2/PLAU/MET/TNFSF4/WNT5A/PLAT/CAMK2N1/CXCL12/MMP12/FLNA/PAK1/PDCD4/IL18/BMPR2/PTGER4/LGALS1/PDGFRB/NMI/IFI16/IDO1/APOH/OSMR/RARRES2/CXCL10/CD74/EREG/CXCL8/NCKAP1L/THBS1/PTGS2/SERPINE1	31
BP	GO:0070997	neuron death	1.41403e-07	2.39979e-06	EGLN3/ENO2/EFNB2/PRKCI/BTG2/F2R/WNT5A/GAPDH/BCL2L1/PSEN1/CTNNB1/CIT/CLU/DKK1/KIF14/NTRK2/GPI/BNIP3/TNFRSF21/FAS/DDR2/TGFB2/HIF1A/TP63/CCL2/NR4A3/NR4A2	27
BP	GO:0007051	spindle organization	1.43136e-07	2.42048e-06	TPX2/RACGAP1/EZR/KIF23/CCNB1/DLGAP5/PRC1/ASPM/CCNB2/NEK2/FLNA/NDC80/STIL/NUF2/GPSM2/KIF11/TUBB/KIF4A/MYH9	19
BP	GO:0019884	antigen processing and presentation of exogenous antigen	1.44385e-07	2.43288e-06	TAP1/TAP2/HLA-A/HLA-DRA/HLA-DQB1/IFI30/CD74/HLA-DQA1/HLA-DPA1/HLA-DRB1	10
BP	GO:0010634	positive regulation of epithelial cell migration	1.46874e-07	2.46383e-06	ITGA2/ITGA3/MET/WNT5A/PROX1/SRPX2/BMPR2/MMP9/SPARC/GPI/EGF/ANXA1/RAB25/ITGB3/TGFB2/HIF1A/THBS1/PTGS2	18
BP	GO:0051591	response to cAMP	1.47266e-07	2.46383e-06	SDC1/PLAT/EZR/IGFBP5/AHR/COL1A1/STAT1/AQP1/AREG/CFTR/FOSB/CYP1B1/AQP9	13
BP	GO:0071900	regulation of protein serine/threonine kinase activity	1.69005e-07	2.81755e-06	MST1R/NOX4/CEMIP/SFN/WNT5A/PROX1/CCNB1/PSEN1/HHEX/PDGFC/CCNB2/DKK1/PAK1/PDCD4/CDC6/BMPR2/CCNA2/PPARG/PDGFRB/EGF/ROBO1/SFRP2/THY1/KITLG/CKS2/TNFAIP3/SFRP1/THBS1	28
BP	GO:0035051	cardiocyte differentiation	1.71485e-07	2.83882e-06	NOX4/EDNRA/EFNB2/ITGB1/PROX1/ACVR1/INHBA/GREM1/FHL2/DKK1/PDCD4/SGCB/PDGFRB/CDK1/GATA4/TGFBR3/TGFB2	17
BP	GO:0036294	cellular response to decreased oxygen levels	1.71485e-07	2.83882e-06	EGLN3/PGK1/AK4/ENO1/MYC/CCNA2/BRIP1/PPARG/AQP1/BNIP3/HILPDA/NDRG1/CYBB/DDR2/HIF1A/SFRP1/PTGS2	17
BP	GO:0045667	regulation of osteoblast differentiation	1.73591e-07	2.86364e-06	RUNX2/CTHRC1/CLIC1/ACVR1/GREM1/IGFBP5/CTNNB1/BMPR2/PPARG/TNFAIP6/SFRP2/IFITM1/AREG/DDR2/TP63/SFRP1	16
MF	GO:0042277	peptide binding	1.0578e-07	2.97505e-06	ITGA2/CEMIP/ACVR1/INHBA/CRIP1/ANPEP/CLU/TAP1/TAP2/HLA-C/HLA-B/HLA-A/PPARG/KDELR3/MARCO/KPNA2/LRP1/HLA-DRA/HLA-DQB1/CD74/MSR1/TGFB2/HLA-DQA1/HLA-DPA1/MME/HLA-DRB1	26
BP	GO:0030514	negative regulation of BMP signaling pathway	1.85633e-07	3.03059e-06	WNT5A/GREM1/DKK1/HTRA3/SKIL/PPARG/FBN1/TNFAIP6/SFRP2/HTRA1/SFRP1	11
BP	GO:0000819	sister chromatid segregation	1.85638e-07	3.03059e-06	CENPF/RACGAP1/TOP2A/KIF23/CCNB1/RAD21/DLGAP5/CTNNB1/PRC1/SMC4/BUB1/NEK2/NDC80/TRIP13/CDC6/NUF2/KIF14/UBE2C/KIF11/KIF4A/BUB1B	21
BP	GO:0050670	regulation of lymphocyte proliferation	1.85638e-07	3.03059e-06	LGALS3/CD55/TNFSF4/CTNNB1/AHR/CD80/IL18/HLA-A/TNFRSF21/PDCD1LG2/ANXA1/IGFBP2/IDO1/KITLG/SDC4/IL1A/TFRC/CD74/HLA-DPA1/HLA-DRB1/NCKAP1L	21
BP	GO:0014074	response to purine-containing compound	1.91548e-07	3.11629e-06	SDC1/PLAT/EZR/IGFBP5/NT5E/AHR/COL1A1/STAT1/CHEK1/AQP1/AREG/CFTR/FOSB/CYP1B1/PTGS2/AQP9	16
BP	GO:0045927	positive regulation of growth	1.96059e-07	3.17872e-06	FN1/EFNA5/AGR2/SEMA7A/SFN/MMP14/ERBB4/PROX1/EZR/CXCL12/HPN/BMPR2/CDK1/WNT2/SFRP2/TGFBR1/CRABP2/TGFBR3/TGFB2/NEDD4L/PRSS2/SFRP1	22
BP	GO:0046651	lymphocyte proliferation	1.97198e-07	3.18623e-06	LGALS3/LEF1/CD55/TNFSF4/CTNNB1/AHR/CD80/IL18/HLA-A/TNFRSF21/PDCD1LG2/MSN/ANXA1/IGFBP2/IDO1/KITLG/SDC4/IL1A/TFRC/CD74/HLA-DPA1/HLA-DRB1/NCKAP1L/IL7R	24
BP	GO:0071634	regulation of transforming growth factor beta production	1.98989e-07	3.2042e-06	FERMT1/FN1/ITGAV/LUM/ITGB8/TGFB2/HIF1A/THBS1/PTGS2	9
MF	GO:0043394	proteoglycan binding	1.20905e-07	3.26444e-06	ITGA2/FN1/COL5A1/COMP/CTSB/CTSK/LRP1/TNC/THBS1	9
BP	GO:0034698	response to gonadotropin	2.14485e-07	3.44198e-06	EFNA5/ITGA3/EDNRA/PLAT/INHBA/CCNA2/TGFBR3/CYP1B1	8
BP	GO:0051251	positive regulation of lymphocyte activation	2.18832e-07	3.49983e-06	LEF1/MMP14/CD55/EFNB2/TNFSF4/RUNX1/CD80/IL18/HLA-A/LGALS1/XBP1/PDCD1LG2/ANXA1/IGFBP2/THY1/KITLG/HLA-DRA/HLA-DQB1/IL1A/TFRC/CD74/HLA-DQA1/HLA-DPA1/HLA-DRB1/NCKAP1L/CCL2/VNN1/IL7R	28
BP	GO:0003206	cardiac chamber morphogenesis	2.24129e-07	3.56041e-06	COL11A1/EDNRA/WNT5A/PROX1/ACVR1/FHL2/BMPR2/WNT2/ROBO1/GATA4/SFRP2/TGFBR1/TGFBR3/TGFB2/HIF1A	15
BP	GO:0003231	cardiac ventricle development	2.24129e-07	3.56041e-06	COL11A1/EDNRA/WNT5A/PROX1/ACVR1/PRDM1/BMPR2/PTK7/ROBO1/GATA4/SFRP2/TGFBR1/TGFBR3/TGFB2/HIF1A	15
BP	GO:0030177	positive regulation of Wnt signaling pathway	2.32613e-07	3.68278e-06	SULF1/LEF1/WNT5A/HHEX/ASPM/COL1A1/DKK1/DEPDC1B/PTK7/EGF/LGR5/SFRP2/GPC3/SFRP4/TNFAIP3/SFRP1	16
BP	GO:1901990	regulation of mitotic cell cycle phase transition	2.3683e-07	3.73701e-06	ANLN/PML/CENPF/ACVR1/INHBA/CCNB1/RAD21/DLGAP5/BUB1/E2F7/NDC80/CHEK1/STIL/TRIP13/CDC6/DTL/NUF2/KIF14/UBE2C/CDK1/BUB1B/ANXA1/MUC1/DDR2/WEE1/CCL2	26
BP	GO:0071222	cellular response to lipopolysaccharide	2.4315e-07	3.82393e-06	CD55/EFNB2/TNFSF4/WNT5A/CXCL5/CD80/PDCD4/IL18/XBP1/PDCD1LG2/MRC1/CD68/ABCA1/CXCL10/IL1A/ANKRD1/CXCL8/TNFAIP3/CCL2/SERPINE1	20
BP	GO:0001936	regulation of endothelial cell proliferation	2.6481e-07	4.15074e-06	SULF1/WNT5A/PROX1/ECM1/CXCL12/STAT1/BMPR2/PPARG/SPARC/EGF/WNT2/ALOX5/TGFBR1/APOH/ITGB3/HIF1A/CCL2/THBS1	18
BP	GO:0060070	canonical Wnt signaling pathway	2.66011e-07	4.15576e-06	FERMT1/LEF1/SDC1/CTHRC1/EDNRA/WNT5A/GREM1/PSEN1/HHEX/CTNNB1/ASPM/COL1A1/DKK1/PTK7/CDH2/EGF/WNT2/LGR5/IGFBP2/SFRP2/GPC3/SFRP4/SFRP1/NR4A2	24
MF	GO:0005520	insulin-like growth factor binding	1.63054e-07	4.23314e-06	IGFBP3/IGFBP5/ITGAV/ITGA6/IGFBP7/IGFBP2/ITGB3	7
BP	GO:0007249	I-kappaB kinase/NF-kappaB signaling	2.72926e-07	4.24971e-06	ECT2/EDNRA/F2R/WNT5A/GAPDH/ECM1/CTNNB1/ATP2C1/SLC20A1/STAT1/FLNA/BST2/LGALS1/PRDX4/CTH/BIRC3/S100A4/IL1A/TFRC/TNFSF10/CD74/TNFAIP3/HLA-DRB1	23
BP	GO:0034109	homotypic cell-cell adhesion	2.81632e-07	4.37085e-06	CEACAM5/FN1/CLIC1/CEACAM1/COMP/FLNA/PLAUR/PDPN/MYH9/ITGB3/DSC2/HBB/MMRN1	13
BP	GO:0010464	regulation of mesenchymal cell proliferation	2.86605e-07	4.43345e-06	WNT5A/CTNNB1/STAT1/NFIB/MYC/ZEB1/WNT2/PRRX1	8
BP	GO:0034329	cell junction assembly	2.89678e-07	4.45174e-06	LAMA3/ITGA2/FN1/EFNA5/ECT2/CDH11/MMP14/EFNB2/ERBB4/CTTN/THBS2/WNT5A/GREM1/EPHA2/CTNNB1/DKK1/SRPX2/SRGAP2C/NTRK2/CDH2/ITGA6/CORO1C/DST/THY1/SDC4/ITGA5/ITGB3/SFRP1/THBS1	29
BP	GO:0000070	mitotic sister chromatid segregation	2.90498e-07	4.45174e-06	CENPF/RACGAP1/KIF23/CCNB1/RAD21/DLGAP5/PRC1/SMC4/BUB1/NEK2/NDC80/TRIP13/CDC6/NUF2/KIF14/UBE2C/KIF11/KIF4A/BUB1B	19
BP	GO:0048644	muscle organ morphogenesis	2.91562e-07	4.45174e-06	COL11A1/EDNRA/WNT5A/PROX1/COL3A1/MYLK/WNT2/LIF/TGFBR1/TGFBR3/TGFB2/ANKRD1	12
BP	GO:0071230	cellular response to amino acid stimulus	2.91562e-07	4.45174e-06	BCL2L1/COL5A2/PDGFC/COL1A2/COL1A1/COL3A1/ZEB1/NTRK2/XBP1/COL4A1/MMP2/CYBB	12
BP	GO:0060389	pathway-restricted SMAD protein phosphorylation	3.04234e-07	4.63025e-06	ACVR1/INHBA/GREM1/PMEPA1/DKK1/BMPR2/PPARG/TGFBR1/LRP1/TGFBR3/TGFB2	11
BP	GO:0016055	Wnt signaling pathway	3.06256e-07	4.64603e-06	FERMT1/SULF1/LEF1/SDC1/ITGA3/CTHRC1/EDNRA/WNT5A/GREM1/PSEN1/HHEX/CTNNB1/ASPM/COL1A1/DKK1/DEPDC1B/PTK7/CDH2/EGF/WNT2/RNF213/LGR5/IGFBP2/SFRP2/LRP1/GPC3/SFRP4/TNFAIP3/SFRP1/NR4A2	30
BP	GO:0002040	sprouting angiogenesis	3.11684e-07	4.71322e-06	LEF1/PKM/ESM1/EFNB2/CEACAM1/ITGB1/LOXL2/GREM1/EPHA2/E2F7/SRPX2/RNF213/ALOX5/ANXA1/ROBO1/ITGA5/THBS1/PTGS2	18
BP	GO:0043281	regulation of cysteine-type endopeptidase activity involved in apoptotic process	3.1346e-07	4.72493e-06	EGLN3/SFN/PML/F2R/ARL6IP1/MYC/PPARG/MMP9/AQP1/PLAUR/GPI/BIRC3/ROBO1/SFRP2/FAS/TNFSF10/TP63/THBS1/PTGS2	19
BP	GO:0001914	regulation of T cell mediated cytotoxicity	3.15766e-07	4.74453e-06	CEACAM1/TAP2/HLA-B/HLA-A/AZGP1/HLA-DRA/HLA-DRB1/NCKAP1L/IL7R	9
BP	GO:0198738	cell-cell signaling by wnt	3.36137e-07	5.03458e-06	FERMT1/SULF1/LEF1/SDC1/ITGA3/CTHRC1/EDNRA/WNT5A/GREM1/PSEN1/HHEX/CTNNB1/ASPM/COL1A1/DKK1/DEPDC1B/PTK7/CDH2/EGF/WNT2/RNF213/LGR5/IGFBP2/SFRP2/LRP1/GPC3/SFRP4/TNFAIP3/SFRP1/NR4A2	30
CC	GO:0030662	coated vesicle membrane	4.47327e-07	5.13787e-06	CEMIP/WNT5A/HLA-C/HLA-B/HLA-A/KDELR3/EGF/HLA-DRA/HLA-DQB1/AREG/TFRC/CD74/HLA-DQA1/EREG/HLA-DPA1/CFTR/HLA-DRB1/IL7R	18
BP	GO:0048863	stem cell differentiation	3.44744e-07	5.14716e-06	FN1/RUNX2/SEMA7A/EDNRA/ERBB4/ITGB1/ACVR1/GREM1/CTNNB1/EIF2AK2/CDH2/CORO1C/GATA4/SFRP2/LIF/KITLG/TGFB2/HIF1A/TP63/SFRP1/EPCAM	21
BP	GO:0003205	cardiac chamber development	3.48588e-07	5.18813e-06	COL11A1/EDNRA/WNT5A/PROX1/ACVR1/FHL2/PRDM1/BMPR2/PTK7/WNT2/ROBO1/GATA4/SFRP2/TGFBR1/TGFBR3/TGFB2/HIF1A	17
BP	GO:0070372	regulation of ERK1 and ERK2 cascade	3.56424e-07	5.28808e-06	NOX4/FN1/SEMA7A/ERBB4/F2R/CEACAM1/EZR/INHBA/EPHA2/PDGFC/FAM83D/CCL20/ACTA2/PDGFRB/GATA4/MARCO/LIF/IL1A/CCL18/CD74/ITGB3/DDR2/HLA-DRB1/CCL2	24
BP	GO:0008544	epidermis development	3.64858e-07	5.39624e-06	LAMC2/LAMB3/LAMA3/FERMT1/SFN/WNT5A/INHBA/MCOLN3/IGFBP5/EPHA2/CTNNB1/KLF7/ATP2C1/DKK1/KRT14/LGR5/ANXA1/CRABP2/IL1A/SFRP4/TGFB2/PAX6/TP63/EREG/KRT8/HLA-DRB1	26
BP	GO:0051146	striated muscle cell differentiation	3.70417e-07	5.46133e-06	KRT19/NOX4/CEACAM5/SDC1/MMP14/EFNB2/ITGB1/PROX1/ACVR1/GREM1/IGFBP5/FHL2/DKK1/SGCB/CDH2/XBP1/PDGFRB/CDK1/MYH9/GATA4/ADAM12/CXCL10/ANKRD1	23
BP	GO:0061351	neural precursor cell proliferation	3.72456e-07	5.47429e-06	LEF1/BTG2/WNT5A/ITGB1/PROX1/MELK/RACGAP1/CTNNB1/ASPM/SHCBP1/KIF14/CDH2/EGF/WNT2/PAX6/HIF1A	16
BP	GO:0070141	response to UV-A	3.78555e-07	5.54666e-06	MMP9/TIMP1/MMP3/MMP2/MMP1/MME	6
BP	GO:0010463	mesenchymal cell proliferation	3.93736e-07	5.71877e-06	WNT5A/CTNNB1/STAT1/NFIB/MYC/ZEB1/WNT2/PRRX1/GPC3	9
BP	GO:0019320	hexose catabolic process	3.93736e-07	5.71877e-06	PKM/HK2/ENO2/PGK1/GALE/HK1/PFKP/SLC25A12/ENO1	9
BP	GO:0016485	protein processing	3.93938e-07	5.71877e-06	TMPRSS4/PLAU/ANXA2/MMP14/PGK1/RUNX1/PLAT/KLKB1/PSEN1/HPN/COMP/ENO1/PLAUR/BMP1/MYH9/IFI16/APOH/C1R/MME/THBS1/SERPINE1	21
BP	GO:0001654	eye development	4.06112e-07	5.87197e-06	PRKCI/COL8A1/WNT5A/PROX1/INHBA/PSEN1/EPHA2/CTNNB1/COL5A2/COL5A1/SKIL/PRDM1/BMPR2/ZEB1/AQP1/NTRK2/PDGFRB/FBN1/WNT2/COL4A1/TGFBR1/THY1/MFAP5/TGFB2/PAX6/HIF1A/CYP1B1	27
BP	GO:0048661	positive regulation of smooth muscle cell proliferation	4.07287e-07	5.87197e-06	ITGA2/IGFBP5/STAT1/IL18/MMP9/PDGFRB/MMP2/ITGB3/DDR2/EREG/THBS1/PTGS2/NR4A3	13
BP	GO:0001890	placenta development	4.08225e-07	5.87197e-06	KRT19/LEF1/E2F7/CTSB/PRDM1/BMPR2/PPARG/ITGB8/WNT2/HTRA1/LIF/HIF1A/ADM/MME/SPP1/PTGS2	16
BP	GO:0048565	digestive tract development	4.1351e-07	5.92992e-06	AGR2/WNT5A/CTNNB1/PDGFC/PRDM1/COL3A1/TYMS/GATA4/SFRP2/RARRES2/TGFB2/HIF1A/TP63/CXCL8/SFRP1	15
BP	GO:0043123	positive regulation of I-kappaB kinase/NF-kappaB signaling	4.28828e-07	6.09137e-06	ECT2/F2R/GAPDH/ECM1/CTNNB1/ATP2C1/SLC20A1/FLNA/BST2/LGALS1/CTH/BIRC3/S100A4/IL1A/TFRC/TNFSF10/CD74/HLA-DRB1	18
BP	GO:0071478	cellular response to radiation	4.28828e-07	6.09137e-06	ECT2/BCL2L1/CRIP1/CHEK1/RAD51AP1/BRCA2/MYC/MMP9/AQP1/TIMP1/MMP3/SFRP2/MMP2/IFI16/MMP1/MME/SFRP1/PTGS2	18
BP	GO:0010594	regulation of endothelial cell migration	4.29933e-07	6.09137e-06	MET/WNT5A/CEACAM1/PROX1/EPHA2/SRPX2/BMPR2/PPARG/SPARC/GPI/EGF/EFNA1/ANGPT2/ANXA1/APOH/ITGB3/HIF1A/DCN/THBS1/PTGS2	20
BP	GO:0050920	regulation of chemotaxis	4.29933e-07	6.09137e-06	ITGA2/SEMA7A/MET/EFNB2/WNT5A/GREM1/CXCL12/BMPR2/PDGFRB/ANGPT2/TNFAIP6/ROBO1/RARRES2/CXCL10/CD74/CXCL8/NCKAP1L/CCL2/THBS1/SERPINE1	20
BP	GO:0045619	regulation of lymphocyte differentiation	4.55186e-07	6.42985e-06	LEF1/MMP14/FANCD2/TNFSF4/RUNX1/INHBA/CD80/PRDM1/IL18/ZEB1/XBP1/ANXA1/HLA-DRA/CD74/HLA-DRB1/NCKAP1L/SFRP1/VNN1/IL7R	19
MF	GO:0031994	insulin-like growth factor I binding	2.62745e-07	6.56862e-06	IGFBP3/IGFBP5/ITGAV/ITGA6/IGFBP2/ITGB3	6
BP	GO:0002065	columnar/cuboidal epithelial cell differentiation	4.78851e-07	6.74394e-06	AGR2/WNT5A/PROX1/CTNNB1/PRDM1/NFIB/CDH2/TUBB/TYMS/GATA4/PAX6/HIF1A/TP63/SERPINE1	14
BP	GO:0072006	nephron development	4.89245e-07	6.86981e-06	SULF1/ITGA3/EDNRA/ERBB4/ACAT1/GREM1/CTNNB1/ACTA2/STAT1/MYC/AQP1/PDGFRB/ANGPT2/LIF/GPC3/ITGB3	16
BP	GO:0150063	visual system development	4.9677e-07	6.95479e-06	PRKCI/COL8A1/WNT5A/PROX1/INHBA/PSEN1/EPHA2/CTNNB1/COL5A2/COL5A1/SKIL/PRDM1/BMPR2/ZEB1/AQP1/NTRK2/PDGFRB/FBN1/WNT2/COL4A1/TGFBR1/THY1/MFAP5/TGFB2/PAX6/HIF1A/CYP1B1	27
BP	GO:0021987	cerebral cortex development	5.32638e-07	7.43487e-06	SLC2A1/PSEN1/CTNNB1/ASPM/COL3A1/SRGAP2C/KIF14/NTRK2/CDH2/BNIP3/ROBO1/LAMB1/PAX6/HIF1A	14
BP	GO:0016331	morphogenesis of embryonic epithelium	5.34979e-07	7.44552e-06	SULF1/CTHRC1/RALA/WNT5A/GREM1/CTNNB1/STIL/PTK7/WNT2/SFRP2/SDC4/TGFB2/HIF1A/TP63/ADM/SFRP1	16
BP	GO:0043122	regulation of I-kappaB kinase/NF-kappaB signaling	5.46395e-07	7.58203e-06	ECT2/F2R/WNT5A/GAPDH/ECM1/CTNNB1/ATP2C1/SLC20A1/STAT1/FLNA/BST2/LGALS1/CTH/BIRC3/S100A4/IL1A/TFRC/TNFSF10/CD74/TNFAIP3/HLA-DRB1	21
BP	GO:0071219	cellular response to molecule of bacterial origin	5.66004e-07	7.83111e-06	CD55/EFNB2/TNFSF4/WNT5A/CXCL5/CD80/PDCD4/IL18/XBP1/PDCD1LG2/MRC1/CD68/ABCA1/CXCL10/IL1A/ANKRD1/CXCL8/TNFAIP3/CCL2/SERPINE1	20
BP	GO:2000116	regulation of cysteine-type endopeptidase activity	6.05675e-07	8.35548e-06	EGLN3/SFN/PML/F2R/ARL6IP1/MYC/PPARG/MMP9/AQP1/PLAUR/GPI/BIRC3/ROBO1/SFRP2/FAS/IFI16/TNFSF10/TP63/THBS1/PTGS2	20
BP	GO:0007517	muscle organ development	6.11002e-07	8.40439e-06	COL11A1/LEF1/ITGA11/EDNRA/BTG2/WNT5A/CENPF/ITGB1/PROX1/ETV1/ACVR1/CTNNB1/COL3A1/COL6A3/SGCB/XBP1/MYLK/WNT2/LIF/TGFBR1/LOX/TGFBR3/CXCL10/TGFB2/ANKRD1	25
BP	GO:0021543	pallium development	6.25822e-07	8.58323e-06	SLC2A1/LEF1/BTG2/PROX1/PSEN1/CTNNB1/ASPM/COL3A1/SRGAP2C/KIF14/NTRK2/CDH2/BNIP3/ROBO1/LAMB1/PAX6/HIF1A	17
BP	GO:0140013	meiotic nuclear division	6.31113e-07	8.6307e-06	FANCD2/WNT5A/TOP2A/RAD21/SMC4/ASPM/BUB1/CCNB2/NDC80/RAD51AP1/TRIP13/BRCA2/NUF2/BRIP1/BUB1B/LIF/CKS2/EREG	18
BP	GO:0002063	chondrocyte development	6.39738e-07	8.72337e-06	COL11A1/SULF1/RUNX2/ECM1/COMP/BMPR2/SERPINH1/SFRP2	8
BP	GO:1903053	regulation of extracellular matrix organization	6.43247e-07	8.74593e-06	ANTXR1/RUNX1/AEBP1/FAP/COLGALT1/PDPN/LAMB1/LRP1/ITGB3/DDR2	10
BP	GO:0033273	response to vitamin	6.52952e-07	8.85237e-06	ITGA2/POSTN/RUNX2/COL1A1/BRIP1/TYMS/GATA4/CXCL10/IL1A/SPP1/SFRP1/PTGS2	12
BP	GO:0048880	sensory system development	6.68308e-07	9.03461e-06	PRKCI/COL8A1/WNT5A/PROX1/INHBA/PSEN1/EPHA2/CTNNB1/COL5A2/COL5A1/SKIL/PRDM1/BMPR2/ZEB1/AQP1/NTRK2/PDGFRB/FBN1/WNT2/COL4A1/TGFBR1/THY1/MFAP5/TGFB2/PAX6/HIF1A/CYP1B1	27
BP	GO:0050770	regulation of axonogenesis	6.9633e-07	9.38653e-06	FN1/EFNA5/SEMA7A/WNT5A/PSEN1/CXCL12/SKIL/PAK1/BMPR2/NTRK2/CDH2/EFNA1/ROBO1/THY1/CRABP2/SPP1	16
BP	GO:0032355	response to estradiol	8.0622e-07	1.08061e-05	ITGA2/ENO2/CTNNB1/COL1A1/CCNA2/GPI/PDGFRB/ANXA1/IGFBP2/MMP2/AREG/SFRP1/CYP1B1/PTGS2	14
BP	GO:0051101	regulation of DNA binding	8.0622e-07	1.08061e-05	ITGA2/LEF1/PSEN1/CTNNB1/NEK2/ID1/PPARG/MMP9/PLAUR/EGF/TXN/LIF/IFI16/PAX6	14
BP	GO:0072175	epithelial tube formation	8.08853e-07	1.08107e-05	CTHRC1/RALA/WNT5A/PROX1/GREM1/CTNNB1/STIL/PTK7/EGF/SFRP2/SDC4/TGFB2/HIF1A/ADM/SFRP1	15
BP	GO:0090101	negative regulation of transmembrane receptor protein serine/threonine kinase signaling pathway	8.27082e-07	1.0992e-05	WNT5A/ACVR1/GREM1/PMEPA1/DKK1/HTRA3/SKIL/ASPN/PPARG/FBN1/TNFAIP6/SFRP2/HTRA1/LRP1/TGFBR3/SFRP1	16
BP	GO:0097530	granulocyte migration	8.27082e-07	1.0992e-05	LGALS3/CXCL5/CCL20/PTGER4/TNFAIP6/ANXA1/RARRES2/CXCL10/IL1A/CCL18/CD74/TGFB2/CXCL8/NCKAP1L/CCL2/THBS1	16
BP	GO:0030595	leukocyte chemotaxis	8.44897e-07	1.11973e-05	LGALS3/WNT5A/GREM1/CXCL12/CXCL5/CCL20/ALOX5/TNFAIP6/ANXA1/MMP2/RARRES2/CXCL10/CCL18/CD74/TGFB2/CXCL8/NCKAP1L/CCL2/THBS1/SERPINE1	20
BP	GO:0048736	appendage development	8.62378e-07	1.13651e-05	LEF1/RUNX2/WNT5A/GREM1/PSEN1/CTNNB1/COMP/DKK1/COL3A1/BMPR2/ITGA6/SFRP2/PRRX1/CRABP2/GPC3/TGFB2/TP63	17
BP	GO:0060173	limb development	8.62378e-07	1.13651e-05	LEF1/RUNX2/WNT5A/GREM1/PSEN1/CTNNB1/COMP/DKK1/COL3A1/BMPR2/ITGA6/SFRP2/PRRX1/CRABP2/GPC3/TGFB2/TP63	17
BP	GO:0060415	muscle tissue morphogenesis	8.71681e-07	1.14239e-05	COL11A1/EDNRA/WNT5A/PROX1/COL3A1/MYLK/WNT2/TGFBR1/TGFBR3/TGFB2/ANKRD1	11
BP	GO:0071260	cellular response to mechanical stimulus	8.71681e-07	1.14239e-05	SLC2A1/ITGA2/COL1A1/CHEK1/PTGER4/AQP1/BNIP3/FAS/ITGB3/ANKRD1/PTGS2	11
BP	GO:0002697	regulation of immune effector process	8.74201e-07	1.14252e-05	LGALS3/SEMA7A/CD55/TNFSF4/WNT5A/CEACAM1/HK1/AHR/CD80/TAP2/HLA-B/IL18/HLA-A/BST2/XBP1/GPI/ANXA1/AZGP1/HLA-DRA/TFRC/CD74/TGFB2/HLA-DRB1/NCKAP1L/IL7R/NR4A3	26
BP	GO:0002761	regulation of myeloid leukocyte differentiation	8.91818e-07	1.15912e-05	LEF1/CEACAM1/RUNX1/INHBA/CTNNB1/MYC/FBN1/TNFRSF11B/TNFAIP6/LIF/KITLG/CD74/HLA-DRB1/SFRP1	14
BP	GO:0030278	regulation of ossification	8.91818e-07	1.15912e-05	RUNX2/WNT5A/ACVR1/ECM1/GREM1/COMP/DKK1/BMPR2/PTGER4/ALOX5/DDR2/TGFB2/HIF1A/SFRP1	14
BP	GO:0046365	monosaccharide catabolic process	8.96355e-07	1.16181e-05	PKM/HK2/ENO2/PGK1/GALE/HK1/PFKP/SLC25A12/ENO1	9
CC	GO:0005819	spindle	1.05767e-06	1.18106e-05	ECT2/CAPG/CTTN/CENPF/TPX2/RACGAP1/KIF23/CCNB1/RAD21/DLGAP5/CTNNB1/PRC1/ASPM/FAM83D/NEK2/SHCBP1/SMC6/CDC6/KIF14/GPSM2/KIF11/TUBB/CDK1/KIF4A/BUB1B/MYH9/GEM	27
CC	GO:0012507	ER to Golgi transport vesicle membrane	1.12358e-06	1.19739e-05	HLA-C/HLA-B/HLA-A/HLA-DRA/HLA-DQB1/AREG/CD74/HLA-DQA1/HLA-DPA1/HLA-DRB1	10
CC	GO:0042613	MHC class II protein complex	1.13186e-06	1.19739e-05	HLA-DRA/HLA-DQB1/CD74/HLA-DQA1/HLA-DPA1/HLA-DRB1	6
BP	GO:0071229	cellular response to acid chemical	9.52259e-07	1.23089e-05	BCL2L1/COL5A2/PDGFC/COL1A2/COL1A1/COL3A1/ZEB1/NTRK2/XBP1/COL4A1/MMP2/CYBB	12
BP	GO:0030282	bone mineralization	9.85466e-07	1.27034e-05	ACVR1/ECM1/GREM1/COL1A2/COMP/ASPN/BMPR2/ALOX5/MMP13/LOX/GPC3/DDR2/HIF1A/PTGS2	14
BP	GO:0042063	gliogenesis	9.92699e-07	1.27617e-05	LEF1/MMP14/PRKCI/PSEN1/CTNNB1/CLU/COL3A1/SRGAP2C/NFIB/NTRK2/CDH2/BNIP3/TNFRSF21/CDK1/ANXA1/LAMB1/LIF/LRP1/NDRG1/AREG/TGFB2/PAX6/CCL2	23
BP	GO:0003281	ventricular septum development	1.00286e-06	1.28574e-05	WNT5A/PROX1/ACVR1/PRDM1/BMPR2/PTK7/ROBO1/GATA4/TGFBR1/TGFBR3/TGFB2	11
BP	GO:0042102	positive regulation of T cell proliferation	1.02019e-06	1.30441e-05	CD55/TNFSF4/CD80/IL18/HLA-A/PDCD1LG2/ANXA1/IGFBP2/KITLG/IL1A/TFRC/HLA-DPA1/NCKAP1L	13
BP	GO:0072089	stem cell proliferation	1.08782e-06	1.38451e-05	FERMT1/RUNX2/SFN/WNT5A/RUNX1/CTNNB1/EIF2AK2/BRCA2/NFIB/SFRP2/PRRX1/KITLG/TP63/EPCAM	14
BP	GO:0050730	regulation of peptidyl-tyrosine phosphorylation	1.08871e-06	1.38451e-05	NOX4/EFNA5/ERBB4/ACVR1/GREM1/PSEN1/PDGFC/CD80/IL18/EGF/EFNA1/SFRP2/LIF/THY1/KITLG/AREG/CD74/ITGA5/ITGB3/EREG/SFRP1	21
CC	GO:0030665	clathrin-coated vesicle membrane	1.3728e-06	1.41504e-05	CEMIP/WNT5A/EGF/HLA-DRA/HLA-DQB1/AREG/TFRC/CD74/HLA-DQA1/EREG/HLA-DPA1/CFTR/HLA-DRB1/IL7R	14
MF	GO:0033218	amide binding	5.90665e-07	1.42393e-05	ITGA2/CEMIP/ACVR1/INHBA/CRIP1/ANPEP/CLU/TAP1/TAP2/HLA-C/HLA-B/HLA-A/PPARG/KDELR3/DHFR/TYMS/MARCO/KPNA2/LRP1/HLA-DRA/HLA-DQB1/CD74/MSR1/TGFB2/HLA-DQA1/HLA-DPA1/MME/HLA-DRB1	28
BP	GO:0010717	regulation of epithelial to mesenchymal transition	1.13725e-06	1.44235e-05	LEF1/LOXL2/ACVR1/GREM1/CTNNB1/COL1A1/HPN/PDPN/EFNA1/SFRP2/TGFBR1/TGFB2/SFRP1	13
BP	GO:0055123	digestive system development	1.16413e-06	1.47248e-05	AGR2/WNT5A/CTNNB1/PDGFC/PRDM1/COL3A1/TYMS/GATA4/SFRP2/RARRES2/TGFB2/HIF1A/TP63/CXCL8/SFRP1	15
BP	GO:0002822	regulation of adaptive immune response based on somatic recombination of immune receptors built from immunoglobulin superfamily domains	1.1772e-06	1.48504e-05	CD55/TNFSF4/CEACAM1/AHR/CD80/TAP2/HLA-B/IL18/HLA-A/ANXA1/AZGP1/HLA-DRA/TFRC/TNFAIP3/HLA-DRB1/NCKAP1L/IL7R	17
BP	GO:0140694	non-membrane-bounded organelle assembly	1.23217e-06	1.55023e-05	KRT19/ANLN/CENPF/SQLE/ITGB1/PROX1/TPX2/RACGAP1/EZR/KIF23/DLGAP5/PRC1/ASPM/CCNB2/NEK2/FLNA/NDC80/STIL/GPSM2/KIF11/TUBB/PDGFRB/KIF4A/RNF213/MSN/ANKRD1	26
BP	GO:1902850	microtubule cytoskeleton organization involved in mitosis	1.25625e-06	1.57633e-05	ITGB1/TPX2/RACGAP1/KIF23/CCNB1/DLGAP5/PRC1/NEK2/FLNA/NDC80/STIL/NUF2/GPSM2/KIF11/KIF4A/PAX6	16
BP	GO:0014812	muscle cell migration	1.26611e-06	1.58449e-05	ITGA2/IGFBP3/PLAU/PLAT/IGFBP5/PDGFRB/ANXA1/LRP1/ITGB3/DDR2/CYP1B1/NR4A3/SERPINE1	13
BP	GO:0002504	antigen processing and presentation of peptide or polysaccharide antigen via MHC class II	1.31204e-06	1.6333e-05	HLA-DRA/HLA-DQB1/IFI30/CD74/HLA-DQA1/HLA-DPA1/HLA-DRB1/THBS1	8
BP	GO:0071711	basement membrane organization	1.31204e-06	1.6333e-05	LAMB3/FERMT1/MMP11/ITGB1/HPN/COL3A1/LAMB1/COL4A1	8
CC	GO:0043202	lysosomal lumen	1.7007e-06	1.7092e-05	SDC1/VCAN/BGN/CTSB/CTSK/PDGFRB/LUM/SDC4/GPC3/IFI30/CD74/DCN	12
MF	GO:0008201	heparin binding	7.35262e-07	1.71139e-05	LAMC2/COL11A1/FN1/POSTN/THBS2/COL5A1/COMP/APLP1/FBN1/FSTL1/APOH/TGFBR3/CXCL10/SERPINA5/CXCL8/SFRP1/THBS1	17
BP	GO:0050727	regulation of inflammatory response	1.42822e-06	1.77324e-05	ITGA2/SEMA7A/FANCD2/TNFSF4/WNT5A/KLKB1/CAMK2N1/NT5E/PDCD4/IL18/PPARG/MMP9/PTGER4/LGALS1/MMP3/NMI/BIRC3/ALOX5/TNFAIP6/ANXA1/IDO1/OSMR/TNFAIP3/HLA-DRB1/TNC/PTGS2/SERPINE1	27
BP	GO:0060393	regulation of pathway-restricted SMAD protein phosphorylation	1.44472e-06	1.78902e-05	ACVR1/INHBA/GREM1/PMEPA1/DKK1/BMPR2/PPARG/TGFBR1/LRP1/TGFB2	10
BP	GO:0010763	positive regulation of fibroblast migration	1.47068e-06	1.80226e-05	ITGB1/ACTA2/AQP1/ITGB3/DDR2/THBS1	6
BP	GO:0019885	antigen processing and presentation of endogenous peptide antigen via MHC class I	1.47068e-06	1.80226e-05	TAP1/TAP2/HLA-C/HLA-B/HLA-A/AZGP1	6
BP	GO:0038065	collagen-activated signaling pathway	1.47068e-06	1.80226e-05	ITGA2/ITGA11/COL1A1/COL4A2/COL4A1/DDR2	6
BP	GO:0090594	inflammatory response to wounding	1.47068e-06	1.80226e-05	F2R/PPARG/TIMP1/ALOX5/IL1A/HIF1A	6
BP	GO:0031960	response to corticosteroid	1.47791e-06	1.80642e-05	SDC1/ACVR1/PLAT/COL1A1/AQP1/IGFBP7/TYMS/FIBIN/ANXA1/IGFBP2/AREG/CYBB/ADM/FOSB/CYP1B1/PTGS2	16
BP	GO:0048705	skeletal system morphogenesis	1.48668e-06	1.81244e-05	COL11A1/RUNX2/MMP14/GREM1/PSEN1/CTNNB1/COL1A1/COMP/COL3A1/BMPR2/ZEB1/BMP1/SERPINH1/PRRX1/MMP13/TGFBR1/MMP2/SFRP4/SFRP1	19
BP	GO:2000050	regulation of non-canonical Wnt signaling pathway	1.5126e-06	1.83928e-05	WNT5A/DKK1/RNF213/SFRP2/GPC3/SFRP4/SFRP1	7
CC	GO:0005938	cell cortex	1.90964e-06	1.87238e-05	LAMC2/SLC2A1/KRT19/TPM4/TRIP10/ECT2/ENO2/ANLN/CTTN/MELK/EZR/PSEN1/CTNNB1/CALD1/FLNA/ENO1/GPSM2/CDH2/CORO1C/MYH9/DST/CYTIP	22
BP	GO:0051235	maintenance of location	1.55392e-06	1.88468e-05	CEMIP/HK2/PML/F2R/HK1/SQLE/MCOLN3/PSEN1/ASPM/ITGAV/FLNA/PPARG/KDELR3/GPSM2/FBN1/RNF213/TXN/ANXA1/HILPDA/THY1/ABCA1/CXCL10/ITGB3/MSR1	24
CC	GO:0030667	secretory granule membrane	2.01277e-06	1.92651e-05	LGALS3/PLAU/PCDH7/CD55/CEACAM1/PSEN1/ITGAV/ANPEP/HLA-C/HLA-B/BST2/PLAUR/SPARC/OLR1/CD68/SERPINA5/CYBB/ITGB3/SLC2A3/MME/NCKAP1L/VNN1	22
BP	GO:0000075	cell cycle checkpoint signaling	1.59258e-06	1.92662e-05	PML/FANCD2/CENPF/PROX1/CCNB1/BUB1/NDC80/CHEK1/TRIP13/BRCA2/CDC6/DTL/NUF2/BRIP1/CDK1/BUB1B/MUC1	17
BP	GO:0051225	spindle assembly	1.59914e-06	1.92746e-05	TPX2/RACGAP1/KIF23/PRC1/ASPM/CCNB2/NEK2/FLNA/NDC80/STIL/GPSM2/KIF11/TUBB/KIF4A	14
BP	GO:0051250	negative regulation of lymphocyte activation	1.60145e-06	1.92746e-05	LGALS3/TNFSF4/CEACAM1/RUNX1/INHBA/CD80/TNFRSF21/PDCD1LG2/ANXA1/IDO1/SDC4/CD74/TNFAIP3/HLA-DRB1/NCKAP1L/SFRP1	16
BP	GO:0006734	NADH metabolic process	1.64041e-06	1.95936e-05	PKM/HK2/ENO2/PGK1/HK1/PFKP/SLC25A12/ENO1	8
BP	GO:0044319	wound healing, spreading of cells	1.64041e-06	1.95936e-05	FERMT1/CEACAM1/ITGB1/MMP12/COL5A1/FLNA/PDPN/ITGA5	8
BP	GO:0090505	epiboly involved in wound healing	1.64041e-06	1.95936e-05	FERMT1/CEACAM1/ITGB1/MMP12/COL5A1/FLNA/PDPN/ITGA5	8
CC	GO:1904090	peptidase inhibitor complex	2.13086e-06	1.99211e-05	PLAU/PLAT/CTSB/SERPINA5/SERPINE1	5
BP	GO:0051784	negative regulation of nuclear division	1.68228e-06	2.00429e-05	CENPF/CCNB1/RAD21/BUB1/NDC80/CHEK1/TRIP13/NUF2/BUB1B/LIF	10
BP	GO:0001701	in utero embryonic development	1.7209e-06	2.04514e-05	KRT19/LEF1/EDNRA/ITGB1/ACVR1/BCL2L1/CCNB1/CTNNB1/CCNB2/NEK2/E2F7/SKIL/CHEK1/STIL/PRDM1/BRCA2/COL3A1/GPI/WNT2/MYH9/TM4SF1/LIF/TGFBR1/HIF1A/ELF3/ADM	26
BP	GO:0070665	positive regulation of leukocyte proliferation	1.7342e-06	2.05577e-05	CD55/TNFSF4/BCL2L1/CD80/IL18/HLA-A/BST2/PDCD1LG2/ANXA1/IGFBP2/KITLG/IL1A/TFRC/CD74/HLA-DPA1/NCKAP1L	16
BP	GO:2000027	regulation of animal organ morphogenesis	1.75659e-06	2.07709e-05	SULF1/RUNX2/CTHRC1/WNT5A/GREM1/CTNNB1/DKK1/PTK7/WNT2/TNFRSF11B/ROBO1/SFRP2/GPC3/SFRP1	14
BP	GO:0030098	lymphocyte differentiation	1.79456e-06	2.11668e-05	LEF1/RUNX2/MMP14/FANCD2/TNFSF4/RUNX1/ITGB1/INHBA/HHEX/CTNNB1/CD80/PRDM1/IL18/PTGER4/ZEB1/LGALS1/XBP1/ANXA1/HLA-DRA/IL1A/CD74/CDH17/HLA-DRB1/NCKAP1L/SFRP1/VNN1/IL7R	27
BP	GO:0032147	activation of protein kinase activity	1.80204e-06	2.12021e-05	EFNA5/ECT2/WNT5A/TPX2/GREM1/PDGFC/IL18/KIF14/EGF/TXN/AREG/ITGB3/TGFB2/EREG/NCKAP1L	15
BP	GO:0032964	collagen biosynthetic process	1.87826e-06	2.20438e-05	ITGA2/F2R/RUNX1/INHBA/COL1A1/COL5A1/PDGFRB/SERPINH1/DDR2	9
CC	GO:0005912	adherens junction	2.43269e-06	2.2226e-05	LAMA3/EFNA5/ANXA2/CDH11/EFNB2/CEACAM1/EZR/CTNNB1/BMPR2/CDH2/MSN/MYH9/ANXA1/NDRG1/DSC2/KRT18	16
BP	GO:0045621	positive regulation of lymphocyte differentiation	1.92774e-06	2.24835e-05	LEF1/MMP14/TNFSF4/RUNX1/CD80/IL18/XBP1/ANXA1/HLA-DRA/CD74/HLA-DRB1/NCKAP1L/VNN1/IL7R	14
BP	GO:0071621	granulocyte chemotaxis	1.92774e-06	2.24835e-05	LGALS3/CXCL5/CCL20/TNFAIP6/ANXA1/RARRES2/CXCL10/CCL18/CD74/TGFB2/CXCL8/NCKAP1L/CCL2/THBS1	14
BP	GO:0050769	positive regulation of neurogenesis	1.93001e-06	2.24835e-05	FN1/EFNA5/SEMA7A/PRKCI/ITGB1/TGM2/CXCL12/CTNNB1/ASPM/SKIL/BMPR2/NTRK2/WNT2/ROBO1/LIF/CRABP2/PAX6/HIF1A/MME	19
BP	GO:0014909	smooth muscle cell migration	1.93507e-06	2.24868e-05	ITGA2/IGFBP3/PLAU/PLAT/IGFBP5/PDGFRB/LRP1/ITGB3/DDR2/CYP1B1/NR4A3/SERPINE1	12
BP	GO:0032946	positive regulation of mononuclear cell proliferation	1.96207e-06	2.27446e-05	CD55/TNFSF4/BCL2L1/CD80/IL18/HLA-A/PDCD1LG2/ANXA1/IGFBP2/KITLG/IL1A/TFRC/CD74/HLA-DPA1/NCKAP1L	15
BP	GO:0090504	epiboly	2.03619e-06	2.3546e-05	FERMT1/CEACAM1/ITGB1/MMP12/COL5A1/FLNA/PDPN/ITGA5	8
BP	GO:0002456	T cell mediated immunity	2.12622e-06	2.4527e-05	CD55/TNFSF4/CEACAM1/AHR/TAP2/HLA-B/IL18/HLA-A/AZGP1/HLA-DRA/HLA-DRB1/NCKAP1L/IL7R	13
BP	GO:0050777	negative regulation of immune response	2.1361e-06	2.45807e-05	LGALS3/CD55/TNFSF4/CEACAM1/MMP12/AHR/COL3A1/HLA-B/HLA-A/PPARG/NMI/ANXA1/IFI16/TNFAIP3/HLA-DRB1/NCKAP1L/IL7R	17
CC	GO:0031253	cell projection membrane	2.75436e-06	2.46056e-05	FERMT1/ANTXR1/ITGA3/SLC6A6/CEACAM1/ITGB1/EZR/EPHA2/FAP/CTNNB1/ITGAV/PAK1/SLC1A2/AQP1/GPI/PDPN/CORO1C/MSN/CA9/THY1/RAB25/ITGA5/ITGB3	23
BP	GO:0032354	response to follicle-stimulating hormone	2.16308e-06	2.47999e-05	EFNA5/EDNRA/PLAT/INHBA/TGFBR3/CYP1B1	6
BP	GO:0045807	positive regulation of endocytosis	2.16593e-06	2.47999e-05	ITGA2/ANXA2/WNT5A/GREM1/CLU/EGF/LRP1/GPC3/SFRP4/NEDD4L/NCKAP1L/SERPINE1	12
BP	GO:0051402	neuron apoptotic process	2.17091e-06	2.47999e-05	EGLN3/PRKCI/BTG2/F2R/GAPDH/BCL2L1/PSEN1/CTNNB1/CIT/KIF14/NTRK2/GPI/BNIP3/TNFRSF21/FAS/TGFB2/HIF1A/TP63/CCL2/NR4A2	20
CC	GO:0030027	lamellipodium	2.90021e-06	2.53453e-05	ANTXR1/CAPG/CTTN/ITGB1/EPHA2/FAP/CTNNB1/ITGAV/ACTA2/DPYSL3/PAK1/CDH2/PDPN/MYLK/CORO1C/KITLG/ITGB3	17
BP	GO:0001913	T cell mediated cytotoxicity	2.23458e-06	2.54042e-05	CEACAM1/TAP2/HLA-B/HLA-A/AZGP1/HLA-DRA/HLA-DRB1/NCKAP1L/IL7R	9
BP	GO:0030850	prostate gland development	2.23458e-06	2.54042e-05	SULF1/WNT5A/CTNNB1/CRIP1/ANXA1/MMP2/TP63/TNC/SFRP1	9
BP	GO:0051983	regulation of chromosome segregation	2.31532e-06	2.62589e-05	CENPF/CCNB1/MKI67/RAD21/DLGAP5/SMC4/BUB1/NDC80/TRIP13/SMC6/CDC6/NUF2/UBE2C/BUB1B	14
BP	GO:0051962	positive regulation of nervous system development	2.33953e-06	2.64698e-05	FN1/EFNA5/SEMA7A/PRKCI/THBS2/ITGB1/TGM2/CXCL12/CTNNB1/ASPM/SKIL/SRPX2/BMPR2/NTRK2/WNT2/ROBO1/LIF/CRABP2/PAX6/HIF1A/MME	21
BP	GO:0002460	adaptive immune response based on somatic recombination of immune receptors built from immunoglobulin superfamily domains	2.37818e-06	2.68428e-05	LEF1/CD55/TNFSF4/CEACAM1/AHR/CD80/CLU/TAP2/HLA-B/IL18/HLA-A/ANXA1/AZGP1/HLA-DRA/HLA-DQB1/TFRC/C1S/CD74/C1R/HLA-DQA1/HLA-DPA1/TNFAIP3/HLA-DRB1/NCKAP1L/IL7R	25
BP	GO:0002064	epithelial cell development	2.44579e-06	2.75399e-05	SDC1/SFN/MET/EDNRA/WNT5A/PROX1/EZR/EPHA2/ACTA2/PRDM1/CDH2/TYMS/MSN/RAB25/IL1A/PAX6/HIF1A/TP63	18
CC	GO:0072686	mitotic spindle	3.24672e-06	2.77699e-05	ECT2/CAPG/CTTN/TPX2/RACGAP1/KIF23/PRC1/ASPM/FAM83D/SMC6/CDC6/GPSM2/KIF11/TUBB/CDK1/GEM	16
BP	GO:0007052	mitotic spindle organization	2.53403e-06	2.84655e-05	TPX2/RACGAP1/KIF23/CCNB1/DLGAP5/PRC1/NEK2/FLNA/NDC80/STIL/NUF2/GPSM2/KIF11/KIF4A	14
BP	GO:1905475	regulation of protein localization to membrane	2.55859e-06	2.86732e-05	LGALS3/AGR2/CEMIP/ITGA3/MMP14/PRKCI/ITGB1/BCL2L1/EZR/EPHA2/ATP2C1/LRRC15/CDH2/TNFAIP6/LRP1/GPC3	16
BP	GO:0045637	regulation of myeloid cell differentiation	2.61454e-06	2.91771e-05	LEF1/CEACAM1/RUNX1/INHBA/CTNNB1/STAT1/MYC/FBN1/TNFRSF11B/TNFAIP6/LIF/KITLG/LOX/CD74/HIF1A/HLA-DRB1/NCKAP1L/SFRP1	18
BP	GO:0060512	prostate gland morphogenesis	2.61592e-06	2.91771e-05	SULF1/WNT5A/CRIP1/MMP2/TP63/TNC/SFRP1	7
BP	GO:0045165	cell fate commitment	2.77136e-06	3.08379e-05	RUNX2/EDNRA/PML/ERBB4/WNT5A/ITGB1/PROX1/ACVR1/PSEN1/CTNNB1/DKK1/PRDM1/PPARG/PDPN/WNT2/GATA4/SFRP2/PRRX1/TGFBR1/PAX6/SFRP1	21
CC	GO:0101002	ficolin-1-rich granule	3.73904e-06	3.13145e-05	LGALS3/PKM/CD55/PGM2/CTSB/ALDOC/TIMP2/MMP9/GPI/PRDX4/ALOX5/TNFAIP6/PYGL/SLC2A3/HBB/NCKAP1L	16
BP	GO:1904377	positive regulation of protein localization to cell periphery	3.00613e-06	3.33479e-05	LGALS3/AGR2/ITGA3/PRKCI/ITGB1/EZR/EPHA2/ATP2C1/GPSM2/LRP1	10
BP	GO:2001237	negative regulation of extrinsic apoptotic signaling pathway	3.01106e-06	3.33479e-05	LGALS3/CTTN/ACVR1/BCL2L1/ITGAV/ITGA6/SFRP2/TGFBR1/IL1A/TNFAIP3/THBS1/SERPINE1	12
BP	GO:0010762	regulation of fibroblast migration	3.075e-06	3.39762e-05	ITGB1/ACTA2/AQP1/CORO1C/SDC4/ITGB3/DDR2/THBS1	8
BP	GO:0071216	cellular response to biotic stimulus	3.0993e-06	3.41647e-05	CD55/EFNB2/TNFSF4/WNT5A/CXCL5/CD80/PDCD4/IL18/XBP1/PDCD1LG2/MRC1/CD68/ABCA1/CXCL10/IL1A/ANKRD1/CXCL8/TNFAIP3/CCL2/SERPINE1	20
BP	GO:0032970	regulation of actin filament-based process	3.12726e-06	3.43925e-05	EFNA5/ECT2/CAPG/MET/CTTN/PROX1/CXCL12/CIT/ACTA2/FLNA/PAK1/ID1/PTGER4/BST2/PDGFRB/PDPN/MYH9/GATA4/TGFBR1/LRP1/SDC4/IL1A/ITGB3/DSC2/NCKAP1L/SFRP1	26
BP	GO:0045582	positive regulation of T cell differentiation	3.15326e-06	3.45176e-05	LEF1/TNFSF4/RUNX1/CD80/IL18/XBP1/ANXA1/HLA-DRA/CD74/HLA-DRB1/NCKAP1L/VNN1/IL7R	13
BP	GO:0071887	leukocyte apoptotic process	3.15326e-06	3.45176e-05	LGALS3/WNT5A/BCL2L1/CXCL12/TNFRSF21/EFNA1/ANXA1/FAS/IDO1/KITLG/CD74/HIF1A/IL7R	13
BP	GO:0051321	meiotic cell cycle	3.27451e-06	3.57619e-05	EDNRA/FANCD2/WNT5A/TOP2A/RAD21/SMC4/ASPM/BUB1/CCNB2/NEK2/NDC80/RAD51AP1/TRIP13/BRCA2/NUF2/BRIP1/BUB1B/MYH9/LIF/CKS2/EREG	21
BP	GO:0007498	mesoderm development	3.30483e-06	3.60097e-05	ITGA2/LEF1/ITGA3/WNT5A/ITGB1/ACVR1/INHBA/EPHA2/DKK1/BMPR2/GPI/SFRP2/ITGB3/TP63	14
BP	GO:0036473	cell death in response to oxidative stress	3.35119e-06	3.64306e-05	MET/PML/MELK/CTNNB1/MMP3/TXN/GATA4/DDR2/HIF1A/CYP1B1/VNN1/NR4A3	12
BP	GO:0003209	cardiac atrium morphogenesis	3.38001e-06	3.66595e-05	WNT5A/PROX1/ACVR1/BMPR2/WNT2/GATA4/TGFB2	7
BP	GO:0002286	T cell activation involved in immune response	3.4704e-06	3.72969e-05	LGALS3/LEF1/TNFSF4/CEACAM1/PSEN1/CD80/IL18/PTGER4/ANXA1/HLA-DRA/CD74/HLA-DRB1/NCKAP1L	13
BP	GO:0030326	embryonic limb morphogenesis	3.4704e-06	3.72969e-05	LEF1/RUNX2/WNT5A/GREM1/PSEN1/CTNNB1/DKK1/SFRP2/PRRX1/CRABP2/GPC3/TGFB2/TP63	13
BP	GO:0035113	embryonic appendage morphogenesis	3.4704e-06	3.72969e-05	LEF1/RUNX2/WNT5A/GREM1/PSEN1/CTNNB1/DKK1/SFRP2/PRRX1/CRABP2/GPC3/TGFB2/TP63	13
BP	GO:0043200	response to amino acid	3.4704e-06	3.72969e-05	BCL2L1/COL5A2/PDGFC/COL1A2/COL1A1/COL3A1/SLC1A2/ZEB1/NTRK2/XBP1/COL4A1/MMP2/CYBB	13
MF	GO:0032395	MHC class II receptor activity	1.71069e-06	3.84906e-05	HLA-DRA/HLA-DQB1/HLA-DQA1/HLA-DPA1/HLA-DRB1	5
BP	GO:0043534	blood vessel endothelial cell migration	3.71944e-06	3.98485e-05	EFNB2/ITGB1/GREM1/EPHA2/ID1/SRPX2/PPARG/EFNA1/ANGPT2/MYH9/ANXA1/ROBO1/HIF1A/CYP1B1/THBS1/PTGS2	16
BP	GO:2001243	negative regulation of intrinsic apoptotic signaling pathway	3.72471e-06	3.98485e-05	BCL2L1/CXCL12/CLU/ENO1/MMP9/PLAUR/XBP1/SFRP2/MUC1/CD74/HIF1A/PTGS2	12
BP	GO:0002819	regulation of adaptive immune response	3.75067e-06	4.00354e-05	CD55/TNFSF4/CEACAM1/AHR/CD80/TAP2/HLA-B/IL18/HLA-A/ANXA1/AZGP1/HLA-DRA/TFRC/TNFAIP3/HLA-DRB1/NCKAP1L/IL7R	17
BP	GO:0003158	endothelium development	4.27781e-06	4.53249e-05	MET/EDNRA/CEACAM1/PROX1/ACVR1/EZR/CTNNB1/ID1/BMPR2/ZEB1/PDPN/MSN/FSTL1/CXCL10	14
BP	GO:0045580	regulation of T cell differentiation	4.30284e-06	4.53249e-05	LEF1/FANCD2/TNFSF4/RUNX1/CD80/PRDM1/IL18/ZEB1/XBP1/ANXA1/HLA-DRA/CD74/HLA-DRB1/NCKAP1L/VNN1/IL7R	16
BP	GO:0010761	fibroblast migration	4.30366e-06	4.53249e-05	PML/ITGB1/ACTA2/AQP1/CORO1C/SDC4/ITGB3/DDR2/THBS1	9
BP	GO:0002474	antigen processing and presentation of peptide antigen via MHC class I	4.32149e-06	4.53249e-05	TAP1/TAP2/HLA-C/HLA-B/HLA-A/AZGP1/IFI30	7
BP	GO:0019886	antigen processing and presentation of exogenous peptide antigen via MHC class II	4.32149e-06	4.53249e-05	HLA-DRA/HLA-DQB1/IFI30/CD74/HLA-DQA1/HLA-DPA1/HLA-DRB1	7
BP	GO:0050820	positive regulation of coagulation	4.32149e-06	4.53249e-05	PLAU/F2R/PLAT/PSEN1/APOH/THBS1/SERPINE1	7
BP	GO:0007171	activation of transmembrane receptor protein tyrosine kinase activity	4.34228e-06	4.53249e-05	EFNA5/GREM1/PDGFC/EGF/AREG/EREG	6
BP	GO:0055093	response to hyperoxia	4.34228e-06	4.53249e-05	COL1A1/BNIP3/PDGFRB/PDPN/FAS/MMP2	6
BP	GO:0071371	cellular response to gonadotropin stimulus	4.34228e-06	4.53249e-05	EFNA5/EDNRA/PLAT/INHBA/CCNA2/CYP1B1	6
BP	GO:0097709	connective tissue replacement	4.34228e-06	4.53249e-05	F2R/RUNX1/PPARG/TIMP1/IL1A/HIF1A	6
BP	GO:0007292	female gamete generation	4.41717e-06	4.60049e-05	EDNRA/PLAT/TOP2A/INHBA/CTNNB1/ASPM/CCNB2/NDC80/TRIP13/BRCA2/LGR5/TNFAIP6/MMP2/EREG/PTGS2	15
BP	GO:0060394	negative regulation of pathway-restricted SMAD protein phosphorylation	4.4705e-06	4.64578e-05	GREM1/PMEPA1/DKK1/PPARG/LRP1	5
BP	GO:0071542	dopaminergic neuron differentiation	4.53218e-06	4.69952e-05	WNT5A/CTNNB1/DKK1/WNT2/SFRP2/HIF1A/SFRP1/NR4A2	8
BP	GO:1903076	regulation of protein localization to plasma membrane	4.58326e-06	4.74206e-05	LGALS3/AGR2/ITGA3/MMP14/PRKCI/ITGB1/BCL2L1/EZR/EPHA2/ATP2C1/LRRC15/LRP1	12
BP	GO:0045446	endothelial cell differentiation	4.59795e-06	4.74686e-05	MET/EDNRA/CEACAM1/PROX1/ACVR1/EZR/CTNNB1/ID1/BMPR2/ZEB1/PDPN/MSN/FSTL1	13
BP	GO:0034341	response to interferon-gamma	4.65456e-06	4.79481e-05	WNT5A/GAPDH/CCL20/STAT1/PPARG/BST2/NMI/IFITM1/GBP2/MRC1/CCL18/CD74/HLA-DPA1/CCL2	14
BP	GO:0070374	positive regulation of ERK1 and ERK2 cascade	4.67804e-06	4.80849e-05	NOX4/SEMA7A/ERBB4/F2R/INHBA/PDGFC/CCL20/ACTA2/PDGFRB/GATA4/MARCO/IL1A/CCL18/CD74/ITGB3/DDR2/HLA-DRB1/CCL2	18
CC	GO:0031258	lamellipodium membrane	6.21245e-06	5.09674e-05	ANTXR1/EPHA2/FAP/ITGAV/PDPN/ITGB3	6
BP	GO:0045839	negative regulation of mitotic nuclear division	5.02408e-06	5.15296e-05	CENPF/CCNB1/RAD21/BUB1/NDC80/CHEK1/TRIP13/NUF2/BUB1B	9
BP	GO:0007093	mitotic cell cycle checkpoint signaling	5.06052e-06	5.17907e-05	PML/FANCD2/CENPF/CCNB1/BUB1/NDC80/CHEK1/TRIP13/CDC6/DTL/NUF2/CDK1/BUB1B/MUC1	14
BP	GO:0014910	regulation of smooth muscle cell migration	5.13272e-06	5.24159e-05	ITGA2/IGFBP3/PLAU/IGFBP5/PDGFRB/LRP1/ITGB3/DDR2/CYP1B1/NR4A3/SERPINE1	11
BP	GO:0070527	platelet aggregation	5.15469e-06	5.25266e-05	FN1/CLIC1/CEACAM1/COMP/FLNA/PDPN/MYH9/ITGB3/HBB/MMRN1	10
MF	GO:0023026	MHC class II protein complex binding	2.43637e-06	5.30501e-05	PKM/HLA-DRA/HLA-DQB1/CD74/HLA-DQA1/HLA-DPA1/HLA-DRB1	7
MF	GO:0019199	transmembrane receptor protein kinase activity	2.59983e-06	5.43789e-05	MST1R/MET/ERBB4/ACVR1/EPHA2/BMPR2/NTRK2/PDGFRB/TGFBR1/TGFBR3/DDR2	11
MF	GO:0004222	metalloendopeptidase activity	2.65852e-06	5.43789e-05	MMP14/MMP11/MMP12/MMP9/BMP1/MMP3/MMP13/MMP2/MMP1/ADAM12/MMP7/PRSS2/MME	13
BP	GO:0060412	ventricular septum morphogenesis	5.45659e-06	5.54832e-05	WNT5A/PROX1/ACVR1/BMPR2/ROBO1/TGFBR1/TGFBR3/TGFB2	8
BP	GO:0035107	appendage morphogenesis	5.49762e-06	5.55208e-05	LEF1/RUNX2/WNT5A/GREM1/PSEN1/CTNNB1/DKK1/COL3A1/SFRP2/PRRX1/CRABP2/GPC3/TGFB2/TP63	14
BP	GO:0035108	limb morphogenesis	5.49762e-06	5.55208e-05	LEF1/RUNX2/WNT5A/GREM1/PSEN1/CTNNB1/DKK1/COL3A1/SFRP2/PRRX1/CRABP2/GPC3/TGFB2/TP63	14
BP	GO:0051384	response to glucocorticoid	5.49762e-06	5.55208e-05	SDC1/ACVR1/PLAT/AQP1/IGFBP7/TYMS/FIBIN/ANXA1/IGFBP2/AREG/ADM/FOSB/CYP1B1/PTGS2	14
BP	GO:0044089	positive regulation of cellular component biogenesis	5.50807e-06	5.55208e-05	LGALS3/FERMT1/EFNA5/SDC1/MET/ANLN/RALA/CTTN/THBS2/EPHA2/CLU/DPYSL3/STIL/PAK1/ID1/SRPX2/GPSM2/NTRK2/MMP3/MSN/TGFBR1/THY1/MMP1/ABCA1/SDC4/TFRC/CDH17/NCKAP1L/SFRP1	29
BP	GO:0071675	regulation of mononuclear cell migration	5.51913e-06	5.55208e-05	LGALS3/WNT5A/ECM1/GREM1/CXCL12/CCL20/MSN/RARRES2/CXCL10/ITGB3/CCL2/THBS1/SERPINE1	13
BP	GO:0031032	actomyosin structure organization	5.60818e-06	5.62077e-05	KRT19/ECT2/MET/ANLN/ITGB5/ITGB1/PROX1/RACGAP1/CIT/PAK1/PTGER4/PDGFRB/MYH9/TGFBR1/SDC4/ANKRD1/SFRP1	17
BP	GO:1901655	cellular response to ketone	5.61124e-06	5.62077e-05	POSTN/EFNA5/TNFSF4/PLAT/AHR/PTGER4/AQP1/MSN/CFTR/SPP1/SFRP1/CYP1B1	12
BP	GO:0010212	response to ionizing radiation	5.96792e-06	5.96539e-05	ECT2/PML/FANCD2/BCL2L1/XRCC4/RAD51AP1/BRCA2/MYC/ANXA1/SFRP2/IFI16/CXCL10/IL1A/SFRP1	14
BP	GO:1902107	positive regulation of leukocyte differentiation	6.13568e-06	6.1072e-05	LEF1/MMP14/TNFSF4/RUNX1/CD80/IL18/XBP1/ANXA1/LIF/KITLG/HLA-DRA/CD74/HLA-DRB1/NCKAP1L/VNN1/IL7R	16
BP	GO:1903708	positive regulation of hemopoiesis	6.13568e-06	6.1072e-05	LEF1/MMP14/TNFSF4/RUNX1/CD80/IL18/XBP1/ANXA1/LIF/KITLG/HLA-DRA/CD74/HLA-DRB1/NCKAP1L/VNN1/IL7R	16
CC	GO:0043292	contractile fiber	7.90362e-06	6.35451e-05	SLC2A1/KRT19/TPM4/PSEN1/CTNNB1/FHL2/CALD1/ACTA2/TPM2/FLNA/ENO1/PAK1/CORO1C/DST/MMP2/IDO1/SDC4/ANKRD1	18
BP	GO:0034644	cellular response to UV	6.4218e-06	6.37854e-05	CRIP1/CHEK1/MYC/MMP9/AQP1/TIMP1/MMP3/MMP2/MMP1/MME/PTGS2	11
BP	GO:0021915	neural tube development	6.46448e-06	6.40744e-05	CTHRC1/RALA/WNT5A/PROX1/PSEN1/EPHA2/STIL/PTK7/SFRP2/SDC4/TGFB2/PAX6/HIF1A/ADM/SFRP1	15
BP	GO:0001952	regulation of cell-matrix adhesion	6.59973e-06	6.51413e-05	FERMT1/EFNA5/PLAU/MMP14/GREM1/MMP12/CORO1C/THY1/SDC4/ITGB3/SFRP1/THBS1/SERPINE1	13
BP	GO:1904375	regulation of protein localization to cell periphery	6.59973e-06	6.51413e-05	LGALS3/AGR2/ITGA3/MMP14/PRKCI/ITGB1/BCL2L1/EZR/EPHA2/ATP2C1/GPSM2/LRRC15/LRP1	13
CC	GO:0031252	cell leading edge	8.31412e-06	6.55348e-05	FERMT1/ANTXR1/CAPG/PRKCI/CTTN/ITGB1/EZR/EPHA2/FAP/CTNNB1/ITGAV/ACTA2/DPYSL3/PAK1/SLC1A2/CDH2/PDPN/MYLK/CORO1C/MYH9/DST/THY1/KITLG/ITGA5/ITGB3	25
BP	GO:0046635	positive regulation of alpha-beta T cell activation	6.65664e-06	6.55659e-05	CD55/TNFSF4/RUNX1/CD80/IL18/HLA-A/ANXA1/HLA-DRA/HLA-DRB1/NCKAP1L	10
BP	GO:0071902	positive regulation of protein serine/threonine kinase activity	6.77318e-06	6.65747e-05	MST1R/NOX4/CEMIP/WNT5A/PROX1/CCNB1/PSEN1/PDGFC/DKK1/PAK1/CDC6/BMPR2/PDGFRB/EGF/ROBO1/KITLG/CKS2/THBS1	18
BP	GO:0002285	lymphocyte activation involved in immune response	6.81644e-06	6.68607e-05	LGALS3/LEF1/TNFSF4/CEACAM1/PSEN1/CD80/IL18/PTGER4/LGALS1/XBP1/ANXA1/HLA-DRA/TFRC/CD74/CDH17/HLA-DRB1/NCKAP1L	17
BP	GO:1990776	response to angiotensin	6.86505e-06	6.71978e-05	INHBA/COL3A1/CDC6/BRIP1/CYBB/DDR2/PTGS2	7
CC	GO:0098637	protein complex involved in cell-matrix adhesion	8.74017e-06	6.75682e-05	PLAU/PLAUR/LAMB1/TNC/MMRN1	5
BP	GO:0043405	regulation of MAP kinase activity	7.04574e-06	6.88236e-05	MST1R/NOX4/WNT5A/PSEN1/PDGFC/DKK1/PAK1/PDCD4/PPARG/PDGFRB/EGF/ROBO1/SFRP2/KITLG/SFRP1/THBS1	16
BP	GO:0051918	negative regulation of fibrinolysis	7.12668e-06	6.93271e-05	PLAU/PLAT/APOH/THBS1/SERPINE1	5
BP	GO:0090177	establishment of planar polarity involved in neural tube closure	7.12668e-06	6.93271e-05	CTHRC1/WNT5A/PTK7/SFRP2/SFRP1	5
BP	GO:2000177	regulation of neural precursor cell proliferation	7.16613e-06	6.95675e-05	BTG2/WNT5A/ITGB1/PROX1/CTNNB1/ASPM/SHCBP1/CDH2/EGF/PAX6/HIF1A	11
BP	GO:0032526	response to retinoic acid	7.53279e-06	7.27483e-05	WNT5A/COL1A1/DKK1/AQP1/PTK7/PDGFRB/IGFBP7/WNT2/IGFBP2/MMP2/ABCA1/TFRC	12
BP	GO:1902106	negative regulation of leukocyte differentiation	7.53279e-06	7.27483e-05	TNFSF4/CEACAM1/RUNX1/INHBA/CTNNB1/MYC/FBN1/TNFRSF11B/TNFAIP6/ANXA1/CD74/SFRP1	12
BP	GO:0051145	smooth muscle cell differentiation	7.54005e-06	7.27483e-05	EDNRA/ACVR1/CTNNB1/COMP/PDCD4/SGCB/ZEB1/CTH/EREG/ADM	10
BP	GO:0050671	positive regulation of lymphocyte proliferation	7.60026e-06	7.30306e-05	CD55/TNFSF4/CD80/IL18/HLA-A/PDCD1LG2/ANXA1/IGFBP2/KITLG/IL1A/TFRC/CD74/HLA-DPA1/NCKAP1L	14
BP	GO:0072073	kidney epithelium development	7.60026e-06	7.30306e-05	SDC1/EDNRA/EFNB2/ACAT1/GREM1/CTNNB1/STAT1/MYC/AQP1/LIF/SDC4/GPC3/SFRP1/EPCAM	14
CC	GO:0032587	ruffle membrane	9.75724e-06	7.40078e-05	FERMT1/ITGB1/EZR/EPHA2/FAP/ITGAV/PAK1/PDPN/CORO1C/ITGA5/ITGB3	11
BP	GO:0030100	regulation of endocytosis	7.74665e-06	7.4286e-05	ITGA2/LGALS3/ANXA2/EFNB2/WNT5A/GREM1/ITGAV/CLU/DKK1/EGF/LRP1/GPC3/ITGB3/SFRP4/NEDD4L/NCKAP1L/SERPINE1	17
BP	GO:0010712	regulation of collagen metabolic process	7.78963e-06	7.43957e-05	ITGA2/F2R/RUNX1/ITGB1/INHBA/FAP/PDGFRB/DDR2	8
BP	GO:2000516	positive regulation of CD4-positive, alpha-beta T cell activation	7.78963e-06	7.43957e-05	CD55/TNFSF4/CD80/IL18/ANXA1/HLA-DRA/HLA-DRB1/NCKAP1L	8
BP	GO:1903078	positive regulation of protein localization to plasma membrane	7.83792e-06	7.47057e-05	LGALS3/AGR2/ITGA3/PRKCI/ITGB1/EZR/EPHA2/ATP2C1/LRP1	9
BP	GO:0001838	embryonic epithelial tube formation	7.86295e-06	7.47931e-05	CTHRC1/RALA/WNT5A/GREM1/CTNNB1/STIL/PTK7/SFRP2/SDC4/TGFB2/HIF1A/ADM/SFRP1	13
MF	GO:0038024	cargo receptor activity	3.77845e-06	7.50134e-05	TMPRSS4/SDC1/LOXL2/VLDLR/OLR1/MARCO/LRP1/MRC1/ABCA1/TFRC/MSR1	11
BP	GO:2000117	negative regulation of cysteine-type endopeptidase activity	7.98455e-06	7.5797e-05	SFN/ARL6IP1/MMP9/AQP1/PLAUR/GPI/BIRC3/SFRP2/IFI16/THBS1/PTGS2	11
BP	GO:0030728	ovulation	8.03702e-06	7.59893e-05	PLAT/INHBA/TNFAIP6/MMP2/EREG/PTGS2	6
BP	GO:0033630	positive regulation of cell adhesion mediated by integrin	8.03702e-06	7.59893e-05	FERMT1/SFRP2/LIF/ITGB3/TGFB2/NCKAP1L	6
BP	GO:0030307	positive regulation of cell growth	8.06433e-06	7.6095e-05	FN1/EFNA5/SEMA7A/SFN/MMP14/CXCL12/HPN/BMPR2/SFRP2/TGFBR1/CRABP2/TGFB2/NEDD4L/PRSS2/SFRP1	15
BP	GO:1903038	negative regulation of leukocyte cell-cell adhesion	8.2262e-06	7.74675e-05	LGALS3/TNFSF4/CEACAM1/RUNX1/CXCL12/CD80/TNFRSF21/PDCD1LG2/ANXA1/IDO1/SDC4/CD74/HLA-DRB1/NCKAP1L	14
BP	GO:0031346	positive regulation of cell projection organization	8.37287e-06	7.86916e-05	ITGA2/FN1/EFNA5/SEMA7A/ITGA3/ANLN/RALA/PRKCI/WNT5A/CXCL12/DPYSL3/VLDLR/FLNA/SKIL/BMPR2/PTK7/NTRK2/ITGA6/CORO1C/ROBO1/ENC1/TGFBR1/CRABP2	23
BP	GO:0045669	positive regulation of osteoblast differentiation	8.52296e-06	7.97844e-05	RUNX2/CTHRC1/CLIC1/ACVR1/CTNNB1/BMPR2/SFRP2/IFITM1/DDR2/TP63	10
BP	GO:2000242	negative regulation of reproductive process	8.52296e-06	7.97844e-05	SULF1/WNT5A/BCL2L1/PLAT/TRIP13/TIMP1/PRDX4/MYH9/LIF/IL1A	10
BP	GO:0050868	negative regulation of T cell activation	8.57103e-06	8.00755e-05	LGALS3/TNFSF4/CEACAM1/RUNX1/CD80/TNFRSF21/PDCD1LG2/ANXA1/IDO1/SDC4/CD74/HLA-DRB1/NCKAP1L	13
MF	GO:0004175	endopeptidase activity	4.2392e-06	8.1756e-05	TMPRSS4/PLAU/MMP14/MMP11/PLAT/KLKB1/PSEN1/FAP/MMP12/HPN/HTRA3/CTSB/MMP9/CTSK/BMP1/MMP3/MMP13/HTRA1/MMP2/MMP1/ADAM12/MMP7/C1S/C1R/PRSS2/MME/SFRP1	27
BP	GO:0030071	regulation of mitotic metaphase/anaphase transition	8.88319e-06	8.26645e-05	CENPF/CCNB1/RAD21/DLGAP5/BUB1/NDC80/TRIP13/CDC6/NUF2/UBE2C/BUB1B	11
BP	GO:0072091	regulation of stem cell proliferation	8.88319e-06	8.26645e-05	FERMT1/RUNX2/SFN/WNT5A/CTNNB1/EIF2AK2/NFIB/PRRX1/KITLG/TP63/EPCAM	11
BP	GO:0002011	morphogenesis of an epithelial sheet	9.03478e-06	8.35806e-05	FERMT1/WNT5A/CEACAM1/ITGB1/MMP12/COL5A1/FLNA/PDPN/ITGA5	9
BP	GO:0002711	positive regulation of T cell mediated immunity	9.03478e-06	8.35806e-05	CD55/TNFSF4/TAP2/HLA-B/IL18/HLA-A/AZGP1/HLA-DRA/HLA-DRB1	9
BP	GO:0055008	cardiac muscle tissue morphogenesis	9.03478e-06	8.35806e-05	COL11A1/EDNRA/WNT5A/PROX1/WNT2/TGFBR1/TGFBR3/TGFB2/ANKRD1	9
BP	GO:0009411	response to UV	9.6166e-06	8.87889e-05	PML/CRIP1/CHEK1/BRCA2/DTL/MYC/MMP9/AQP1/TIMP1/MMP3/MMP2/MMP1/MME/PTGS2	14
BP	GO:0051781	positive regulation of cell division	9.86858e-06	9.05836e-05	ECT2/RACGAP1/KIF23/CIT/PDGFC/CDC6/KIF14/MACC1/IL1A/TGFB2/EREG	11
BP	GO:0070301	cellular response to hydrogen peroxide	9.86858e-06	9.05836e-05	ECT2/MET/AQP1/BNIP3/CDK1/TXN/ANXA1/DDR2/TNFAIP3/CYP1B1/NR4A3	11
BP	GO:2000106	regulation of leukocyte apoptotic process	9.86858e-06	9.05836e-05	LGALS3/WNT5A/BCL2L1/CXCL12/EFNA1/ANXA1/IDO1/KITLG/CD74/HIF1A/IL7R	11
BP	GO:0034446	substrate adhesion-dependent cell spreading	1.00088e-05	9.15145e-05	LAMB3/ANTXR1/FN1/EFNA5/ITGAV/FLNA/KIF14/PDPN/CORO1C/EFNA1/LAMB1/ITGB3	12
BP	GO:1905818	regulation of chromosome separation	1.00088e-05	9.15145e-05	CENPF/CCNB1/RAD21/DLGAP5/SMC4/BUB1/NDC80/TRIP13/CDC6/NUF2/UBE2C/BUB1B	12
BP	GO:0010720	positive regulation of cell development	1.03462e-05	9.44163e-05	FN1/EFNA5/SEMA7A/PRKCI/ITGB1/TGM2/CXCL12/CTNNB1/ASPM/FLNA/SKIL/BMPR2/NTRK2/WNT2/ROBO1/LIF/CRABP2/ITGB3/PAX6/HIF1A/MME	21
BP	GO:0090497	mesenchymal cell migration	1.03844e-05	9.44218e-05	FN1/SEMA7A/EDNRA/ERBB4/ACVR1/CDH2/CORO1C/KITLG/HIF1A	9
BP	GO:0034614	cellular response to reactive oxygen species	1.03868e-05	9.44218e-05	ECT2/MET/MMP9/AQP1/BNIP3/DHFR/CDK1/TXN/ANXA1/MMP2/DDR2/TNFAIP3/CYP1B1/NR4A3	14
BP	GO:0002495	antigen processing and presentation of peptide antigen via MHC class II	1.05429e-05	9.52902e-05	HLA-DRA/HLA-DQB1/IFI30/CD74/HLA-DQA1/HLA-DPA1/HLA-DRB1	7
BP	GO:0048333	mesodermal cell differentiation	1.05429e-05	9.52902e-05	ITGA2/ITGA3/ITGB1/INHBA/DKK1/SFRP2/ITGB3	7
BP	GO:0060317	cardiac epithelial to mesenchymal transition	1.05429e-05	9.52902e-05	ACVR1/PDCD4/WNT2/EFNA1/TGFBR1/TGFBR3/TGFB2	7
BP	GO:0002053	positive regulation of mesenchymal cell proliferation	1.06623e-05	9.61853e-05	WNT5A/CTNNB1/STAT1/MYC/WNT2/PRRX1	6
BP	GO:0060828	regulation of canonical Wnt signaling pathway	1.07819e-05	9.70783e-05	FERMT1/CTHRC1/WNT5A/GREM1/PSEN1/HHEX/CTNNB1/ASPM/COL1A1/DKK1/PTK7/CDH2/EGF/LGR5/IGFBP2/SFRP2/GPC3/SFRP4/SFRP1	19
BP	GO:0051231	spindle elongation	1.08756e-05	9.77357e-05	RACGAP1/KIF23/PRC1/KIF11/KIF4A	5
BP	GO:0061383	trabecula morphogenesis	1.09136e-05	9.78904e-05	GREM1/FHL2/COL1A1/TGFBR1/MMP2/TGFBR3/TGFB2/SFRP1	8
BP	GO:0010595	positive regulation of endothelial cell migration	1.10439e-05	9.88715e-05	MET/WNT5A/PROX1/SRPX2/BMPR2/SPARC/GPI/EGF/ANXA1/ITGB3/HIF1A/THBS1/PTGS2	13
BP	GO:0050731	positive regulation of peptidyl-tyrosine phosphorylation	1.12567e-05	0.000100585	NOX4/EFNA5/ERBB4/ACVR1/GREM1/CD80/IL18/EGF/EFNA1/LIF/KITLG/AREG/CD74/ITGA5/ITGB3/EREG	16
BP	GO:0002699	positive regulation of immune effector process	1.13851e-05	0.00010154	SEMA7A/CD55/TNFSF4/WNT5A/HK1/CD80/TAP2/HLA-B/IL18/HLA-A/XBP1/GPI/ANXA1/AZGP1/HLA-DRA/TFRC/CD74/HLA-DRB1/NR4A3	19
BP	GO:2001242	regulation of intrinsic apoptotic signaling pathway	1.15234e-05	0.00010258	BCL2L1/CXCL12/CLU/ENO1/SKIL/MYC/MMP9/PLAUR/XBP1/SFRP2/MUC1/CD74/HIF1A/PTGS2/VNN1	15
BP	GO:0007091	metaphase/anaphase transition of mitotic cell cycle	1.21279e-05	0.000107354	CENPF/CCNB1/RAD21/DLGAP5/BUB1/NDC80/TRIP13/CDC6/NUF2/UBE2C/BUB1B	11
BP	GO:1900407	regulation of cellular response to oxidative stress	1.21279e-05	0.000107354	MET/CTNNB1/DHFR/MMP3/TXN/ALOX5/GATA4/DDR2/HIF1A/VNN1/NR4A3	11
BP	GO:1902099	regulation of metaphase/anaphase transition of cell cycle	1.21279e-05	0.000107354	CENPF/CCNB1/RAD21/DLGAP5/BUB1/NDC80/TRIP13/CDC6/NUF2/UBE2C/BUB1B	11
BP	GO:0043154	negative regulation of cysteine-type endopeptidase activity involved in apoptotic process	1.2164e-05	0.000107471	SFN/ARL6IP1/MMP9/AQP1/PLAUR/GPI/BIRC3/SFRP2/THBS1/PTGS2	10
BP	GO:0046034	ATP metabolic process	1.27109e-05	0.000112094	PKM/HK2/ENO2/PGK1/HK1/GAPDH/PFKP/LDHA/PSEN1/AK4/NT5E/SLC25A12/ENO1/ALDOC/GPI/SLC4A4/HIF1A	17
BP	GO:0045841	negative regulation of mitotic metaphase/anaphase transition	1.28344e-05	0.000112761	CENPF/CCNB1/RAD21/BUB1/NDC80/TRIP13/NUF2/BUB1B	8
BP	GO:0046850	regulation of bone remodeling	1.28344e-05	0.000112761	PDK4/GREM1/TNFRSF11B/TFRC/ITGB3/TNFAIP3/SPP1/SFRP1	8
BP	GO:0043372	positive regulation of CD4-positive, alpha-beta T cell differentiation	1.29183e-05	0.000113287	TNFSF4/CD80/IL18/ANXA1/HLA-DRA/HLA-DRB1/NCKAP1L	7
BP	GO:0001101	response to acid chemical	1.30227e-05	0.000113991	BCL2L1/COL5A2/PDGFC/COL1A2/COL1A1/COL3A1/SLC1A2/ZEB1/NTRK2/XBP1/COL4A1/MMP2/CYBB	13
BP	GO:1903707	negative regulation of hemopoiesis	1.31701e-05	0.000115067	TNFSF4/CEACAM1/RUNX1/INHBA/CTNNB1/MYC/FBN1/TNFRSF11B/TNFAIP6/ANXA1/CD74/SFRP1	12
BP	GO:0001738	morphogenesis of a polarized epithelium	1.34171e-05	0.000117009	LAMA3/CTHRC1/ERBB4/WNT5A/DKK1/PTK7/MSN/SFRP2/GPC3/TP63/SFRP1	11
CC	GO:0031093	platelet alpha granule lumen	1.58947e-05	0.000118327	FN1/CLU/SPARC/EGF/TIMP1/TGFB2/MMRN1/THBS1/SERPINE1	9
BP	GO:0045453	bone resorption	1.36058e-05	0.000118436	NOX4/PDK4/CTNNB1/CTSK/TNFRSF11B/TFRC/ITGB3/TNFAIP3/SPP1	9
BP	GO:0060571	morphogenesis of an epithelial fold	1.39403e-05	0.000121124	SULF1/WNT5A/CTNNB1/WNT2/HIF1A/TP63	6
MF	GO:0070851	growth factor receptor binding	6.52073e-06	0.000122264	AGR2/ESM1/ERBB4/ECM1/GREM1/PSEN1/PDGFC/PDGFRB/EGF/AREG/IL1A/ITGA5/ITGB3/EREG	14
BP	GO:0019221	cytokine-mediated signaling pathway	1.41823e-05	0.000123	MST1R/WNT5A/CEACAM1/ECM1/CXCL12/MMP12/CXCL5/CCL20/STAT1/IL18/PPARG/NMI/BIRC3/ROBO1/IFITM1/FAS/OSMR/CXCL10/IL1A/CCL18/CD74/HIF1A/EREG/CXCL8/TNFAIP3/KRT18/CCL2/IL7R	28
BP	GO:0042303	molting cycle	1.44021e-05	0.000124449	FERMT1/WNT5A/INHBA/IGFBP5/CTNNB1/DKK1/KRT14/LGR5/LRIG1/TGFB2/TP63/PTGS2	12
BP	GO:0042633	hair cycle	1.44021e-05	0.000124449	FERMT1/WNT5A/INHBA/IGFBP5/CTNNB1/DKK1/KRT14/LGR5/LRIG1/TGFB2/TP63/PTGS2	12
CC	GO:0070820	tertiary granule	1.74388e-05	0.000127462	LGALS3/PLAU/CD55/CEACAM1/ALDOC/LYZ/TIMP2/MMP9/OLR1/TNFAIP6/CYBB/SLC2A3/HBB/NCKAP1L	14
BP	GO:0048546	digestive tract morphogenesis	1.50319e-05	0.000129654	AGR2/WNT5A/CTNNB1/GATA4/SFRP2/HIF1A/TP63/SFRP1	8
BP	GO:0014068	positive regulation of phosphatidylinositol 3-kinase signaling	1.52755e-05	0.000131302	FN1/ERBB4/F2R/PDGFC/IL18/NTRK2/PDGFRB/EGF/TGFB2/DCN	10
BP	GO:0043010	camera-type eye development	1.52895e-05	0.000131302	COL8A1/WNT5A/PROX1/INHBA/PSEN1/EPHA2/CTNNB1/SKIL/BMPR2/ZEB1/AQP1/NTRK2/PDGFRB/FBN1/WNT2/COL4A1/TGFBR1/THY1/TGFB2/PAX6/HIF1A/CYP1B1	22
BP	GO:0051304	chromosome separation	1.53065e-05	0.000131302	CENPF/TOP2A/CCNB1/RAD21/DLGAP5/SMC4/BUB1/NDC80/TRIP13/CDC6/NUF2/UBE2C/BUB1B	13
BP	GO:0002695	negative regulation of leukocyte activation	1.55116e-05	0.00013282	LGALS3/TNFSF4/CEACAM1/RUNX1/INHBA/CD80/TNFRSF21/PDCD1LG2/ANXA1/IDO1/SDC4/CD74/TNFAIP3/HLA-DRB1/NCKAP1L/SFRP1	16
BP	GO:0018149	peptide cross-linking	1.57198e-05	0.000134116	FN1/TGM2/BGN/COL3A1/ANXA1/DCN/THBS1	7
BP	GO:0035909	aorta morphogenesis	1.57198e-05	0.000134116	EFNB2/PROX1/COL3A1/PDGFRB/MYLK/LRP1/TGFB2	7
BP	GO:0002468	dendritic cell antigen processing and presentation	1.60041e-05	0.00013605	CD68/HLA-DRA/CD74/HLA-DRB1/THBS1	5
BP	GO:0060572	morphogenesis of an epithelial bud	1.60041e-05	0.00013605	SULF1/WNT5A/CTNNB1/WNT2/TP63	5
BP	GO:0010965	regulation of mitotic sister chromatid separation	1.63563e-05	0.000138295	CENPF/CCNB1/RAD21/DLGAP5/BUB1/NDC80/TRIP13/CDC6/NUF2/UBE2C/BUB1B	11
BP	GO:0014020	primary neural tube formation	1.63563e-05	0.000138295	CTHRC1/RALA/WNT5A/STIL/PTK7/SFRP2/SDC4/TGFB2/HIF1A/ADM/SFRP1	11
BP	GO:0044784	metaphase/anaphase transition of cell cycle	1.63563e-05	0.000138295	CENPF/CCNB1/RAD21/DLGAP5/BUB1/NDC80/TRIP13/CDC6/NUF2/UBE2C/BUB1B	11
MF	GO:0048029	monosaccharide binding	7.60073e-06	0.000138662	EGLN3/HK2/P4HA1/HK1/PFKP/GPI/PLOD2/MRC1/PYGL/SLC2A3	10
MF	GO:1901681	sulfur compound binding	7.99829e-06	0.000142075	LAMC2/ITGA2/COL11A1/FN1/POSTN/THBS2/DPYSL3/COL5A1/COMP/APLP1/FBN1/LRP1/FSTL1/APOH/TGFBR3/CXCL10/SERPINA5/CXCL8/SFRP1/THBS1	20
CC	GO:1904813	ficolin-1-rich granule lumen	1.98903e-05	0.000142784	PKM/PGM2/CTSB/ALDOC/TIMP2/MMP9/GPI/PRDX4/ALOX5/TNFAIP6/PYGL/HBB	12
BP	GO:0043406	positive regulation of MAP kinase activity	1.71714e-05	0.000144928	MST1R/NOX4/WNT5A/PSEN1/PDGFC/DKK1/PAK1/PDGFRB/EGF/ROBO1/KITLG/THBS1	12
BP	GO:0044839	cell cycle G2/M phase transition	1.74848e-05	0.000147226	CENPF/MELK/CCNB1/RAD21/CIT/CCNB2/NDC80/CHEK1/CDC6/DTL/CCNA2/KIF14/CDK1/WEE1	14
BP	GO:1902041	regulation of extrinsic apoptotic signaling pathway via death domain receptors	1.75374e-05	0.000147226	LGALS3/BCL2L1/SKIL/SFRP2/TNFAIP3/SFRP1/THBS1/SERPINE1	8
BP	GO:1902100	negative regulation of metaphase/anaphase transition of cell cycle	1.75374e-05	0.000147226	CENPF/CCNB1/RAD21/BUB1/NDC80/TRIP13/NUF2/BUB1B	8
BP	GO:1905330	regulation of morphogenesis of an epithelium	1.76423e-05	0.000147845	SULF1/WNT5A/GREM1/CTNNB1/EGF/WNT2/LIF/CXCL10/SFRP1	9
BP	GO:0003230	cardiac atrium development	1.9005e-05	0.000158982	WNT5A/PROX1/ACVR1/BMPR2/WNT2/GATA4/TGFB2	7
CC	GO:0005796	Golgi lumen	2.28293e-05	0.000161006	SDC1/MMP14/MMP11/WNT5A/VCAN/BGN/LUM/MUC1/SDC4/GPC3/DCN	11
BP	GO:0001776	leukocyte homeostasis	1.9838e-05	0.000165656	F2R/CCNB2/SKIL/ANXA1/FAS/KITLG/CD74/HIF1A/TNFAIP3/NCKAP1L/IL7R	11
BP	GO:0010812	negative regulation of cell-substrate adhesion	2.00158e-05	0.000166645	EFNA5/MMP14/SPOCK1/MMP12/COL1A1/CORO1C/ANGPT2/THBS1/SERPINE1	9
BP	GO:0030217	T cell differentiation	2.0027e-05	0.000166645	LEF1/RUNX2/FANCD2/TNFSF4/RUNX1/CTNNB1/CD80/PRDM1/IL18/PTGER4/ZEB1/XBP1/ANXA1/HLA-DRA/IL1A/CD74/HLA-DRB1/NCKAP1L/VNN1/IL7R	20
BP	GO:0051098	regulation of binding	2.03243e-05	0.000168136	ITGA2/LEF1/CTHRC1/ANXA2/MET/WNT5A/PSEN1/CTNNB1/NEK2/DKK1/ID1/PPARG/MMP9/PLAUR/EGF/TXN/LIF/TGFBR1/IFI16/LRP1/LOX/TGFBR3/PAX6	23
BP	GO:0033046	negative regulation of sister chromatid segregation	2.03844e-05	0.000168136	CENPF/CCNB1/RAD21/BUB1/NDC80/TRIP13/NUF2/BUB1B	8
BP	GO:0033048	negative regulation of mitotic sister chromatid segregation	2.03844e-05	0.000168136	CENPF/CCNB1/RAD21/BUB1/NDC80/TRIP13/NUF2/BUB1B	8
BP	GO:0043277	apoptotic cell clearance	2.03844e-05	0.000168136	TGM2/ITGAV/ANXA1/MARCO/LRP1/ITGB3/CCL2/THBS1	8
BP	GO:2000816	negative regulation of mitotic sister chromatid separation	2.03844e-05	0.000168136	CENPF/CCNB1/RAD21/BUB1/NDC80/TRIP13/NUF2/BUB1B	8
CC	GO:0031225	anchored component of membrane	2.44491e-05	0.000169458	CEACAM5/EFNA5/NTM/LY6E/SEMA7A/CD55/NT5E/BST2/PLAUR/EFNA1/THY1/TFPI/GPC3/VNN1	14
BP	GO:0002263	cell activation involved in immune response	2.10234e-05	0.000173103	LGALS3/LEF1/TNFSF4/CEACAM1/PSEN1/CD80/IL18/PTGER4/LGALS1/XBP1/NMI/ANXA1/LRP1/HLA-DRA/TFRC/CD74/CDH17/HLA-DRB1/NCKAP1L/NR4A3	20
BP	GO:1901653	cellular response to peptide	2.1205e-05	0.000173994	PKM/EDNRA/PRKCI/CEACAM1/PLAT/PDK4/INHBA/PSEN1/STAT1/ID1/CDC6/CCNA2/BRIP1/PPARG/XBP1/FBN1/LRP1/RARRES2/ITGB3/DDR2/CYP1B1/NR4A3/NR4A2	23
BP	GO:0045926	negative regulation of growth	2.12053e-05	0.000173994	TMPRSS4/SEMA7A/PLAC8/PML/DCBLD2/WNT5A/INHBA/GREM1/IGFBP5/ENO1/BMPR2/BST2/SFRP2/GPC3/TGFB2/HIF1A/SPP1/SFRP1	18
BP	GO:0051306	mitotic sister chromatid separation	2.18074e-05	0.000178314	CENPF/CCNB1/RAD21/DLGAP5/BUB1/NDC80/TRIP13/CDC6/NUF2/UBE2C/BUB1B	11
BP	GO:1905477	positive regulation of protein localization to membrane	2.18074e-05	0.000178314	LGALS3/AGR2/CEMIP/ITGA3/PRKCI/ITGB1/EZR/EPHA2/ATP2C1/TNFAIP6/LRP1	11
BP	GO:0010742	macrophage derived foam cell differentiation	2.28367e-05	0.000184288	ITGAV/STAT1/IL18/PPARG/ABCA1/ITGB3/MSR1	7
BP	GO:0045742	positive regulation of epidermal growth factor receptor signaling pathway	2.28367e-05	0.000184288	AGR2/RALA/MMP9/PLAUR/EGF/AREG/EREG	7
BP	GO:1902229	regulation of intrinsic apoptotic signaling pathway in response to DNA damage	2.28367e-05	0.000184288	BCL2L1/CXCL12/CLU/SKIL/SFRP2/MUC1/CD74	7
BP	GO:0002399	MHC class II protein complex assembly	2.28376e-05	0.000184288	HLA-DRA/HLA-DQB1/HLA-DQA1/HLA-DPA1/HLA-DRB1	5
BP	GO:0002503	peptide antigen assembly with MHC class II protein complex	2.28376e-05	0.000184288	HLA-DRA/HLA-DQB1/HLA-DQA1/HLA-DPA1/HLA-DRB1	5
BP	GO:0042249	establishment of planar polarity of embryonic epithelium	2.28376e-05	0.000184288	CTHRC1/WNT5A/PTK7/SFRP2/SFRP1	5
BP	GO:0010954	positive regulation of protein processing	2.29286e-05	0.000184288	ANXA2/MMP14/KLKB1/HPN/ENO1/MYH9	6
BP	GO:0033622	integrin activation	2.29286e-05	0.000184288	FERMT1/FN1/CXCL12/KIF14/PTGER4/CDH17	6
BP	GO:0060343	trabecula formation	2.29286e-05	0.000184288	GREM1/FHL2/COL1A1/MMP2/TGFBR3/SFRP1	6
BP	GO:0060740	prostate gland epithelium morphogenesis	2.29286e-05	0.000184288	SULF1/WNT5A/MMP2/TP63/TNC/SFRP1	6
MF	GO:0030414	peptidase inhibitor activity	1.08955e-05	0.000188577	ANXA2/SPOCK1/GAPDH/COL6A3/TIMP2/BST2/TIMP1/TFPI2/SERPINH1/BIRC3/TFPI/GPC3/SERPINA5/RARRES1/SERPINB2/SERPINE1	16
BP	GO:0002762	negative regulation of myeloid leukocyte differentiation	2.36093e-05	0.000189436	CEACAM1/INHBA/CTNNB1/MYC/FBN1/TNFRSF11B/TNFAIP6/SFRP1	8
BP	GO:0031341	regulation of cell killing	2.39437e-05	0.000191709	CD55/CEACAM1/BCL2L1/TAP2/HLA-B/HLA-A/AZGP1/HLA-DRA/HLA-DRB1/NCKAP1L/IL7R	11
BP	GO:0022411	cellular component disassembly	2.39738e-05	0.000191709	CAPG/MMP14/HK2/MMP11/CTTN/TPX2/TOP2A/FAP/MMP12/HPN/DKK1/MYC/MMP9/CTSK/BNIP3/PDPN/CDK1/MMP3/MMP13/TGFBR1/MMP2/MMP1/LRP1/MMP7/DDR2/HIF1A/PRSS2	27
BP	GO:0090100	positive regulation of transmembrane receptor protein serine/threonine kinase signaling pathway	2.41319e-05	0.000192647	FERMT1/SULF1/ACVR1/INHBA/BMPR2/PPARG/GATA4/TGFBR1/TGFBR3/GPC3/TGFB2/THBS1	12
BP	GO:1901214	regulation of neuron death	2.43208e-05	0.000193827	EGLN3/ENO2/EFNB2/PRKCI/BTG2/F2R/WNT5A/BCL2L1/PSEN1/CTNNB1/CLU/DKK1/KIF14/NTRK2/GPI/DDR2/TGFB2/HIF1A/CCL2/NR4A3/NR4A2	21
BP	GO:0001889	liver development	2.44022e-05	0.000194148	ITGA2/MET/CEACAM1/PROX1/ACAT1/CIT/HPN/E2F7/XBP1/TYMS/ANXA1/TGFBR3/TNFAIP3	13
BP	GO:0033044	regulation of chromosome organization	2.4883e-05	0.000197394	PML/CENPF/TOP2A/CCNB1/RAD21/DLGAP5/CTNNB1/SMC4/BUB1/NEK2/NDC80/TRIP13/SMC6/CDC6/NUF2/MYC/UBE2C/BUB1B	18
BP	GO:0050792	regulation of viral process	2.48939e-05	0.000197394	TMPRSS4/LY6E/PROX1/TOP2A/EIF2AK2/STAT1/BST2/LGALS1/IFITM1/KPNA2/IFI16/CD74/CXCL8/HLA-DRB1	14
BP	GO:0071674	mononuclear cell migration	2.53285e-05	0.000200167	LGALS3/WNT5A/ECM1/GREM1/CXCL12/CCL20/MSN/ALOX5/ANXA1/RARRES2/CXCL10/CCL18/ITGB3/CCL2/THBS1/SERPINE1	16
BP	GO:2000241	regulation of reproductive process	2.53285e-05	0.000200167	SULF1/WNT5A/BCL2L1/PLAT/INHBA/CTNNB1/ASPM/RAD51AP1/TRIP13/TIMP1/PRDX4/MYH9/LIF/IL1A/ITGB3/SFRP1	16
CC	GO:0000922	spindle pole	2.97529e-05	0.000202723	CENPF/TPX2/CCNB1/RAD21/DLGAP5/CTNNB1/PRC1/ASPM/FAM83D/NEK2/SMC6/CDC6/GPSM2/KIF11	14
MF	GO:0061134	peptidase regulator activity	1.20865e-05	0.00020396	FN1/ANXA2/SPOCK1/GAPDH/COL6A3/TIMP2/BST2/TIMP1/TFPI2/SERPINH1/BIRC3/SFRP2/TFPI/GPC3/SERPINA5/RARRES1/SERPINB2/SERPINE1	18
BP	GO:0048041	focal adhesion assembly	2.61981e-05	0.000206252	ITGA2/EFNA5/MMP14/CTTN/GREM1/CORO1C/THY1/SDC4/SFRP1/THBS1	10
BP	GO:0002698	negative regulation of immune effector process	2.62147e-05	0.000206252	LGALS3/CD55/TNFSF4/CEACAM1/AHR/HLA-B/HLA-A/BST2/ANXA1/TGFB2/NCKAP1L/IL7R	12
BP	GO:0097305	response to alcohol	2.62296e-05	0.000206252	EFNA5/TNFSF4/BCL2L1/INHBA/CTNNB1/AHR/CTSK/PTGER4/CDK1/IGFBP7/TYMS/TGFBR1/TGFBR3/CYBB/CFTR/FOSB/SFRP1/CYP1B1	18
BP	GO:1903900	regulation of viral life cycle	2.63073e-05	0.000206519	TMPRSS4/LY6E/PROX1/TOP2A/EIF2AK2/BST2/LGALS1/IFITM1/KPNA2/IFI16/CD74/CXCL8/HLA-DRB1	13
MF	GO:0030297	transmembrane receptor protein tyrosine kinase activator activity	1.2558e-05	0.000206748	EFNA5/GREM1/EGF/AREG/EREG	5
BP	GO:0046638	positive regulation of alpha-beta T cell differentiation	2.7251e-05	0.000212412	TNFSF4/RUNX1/CD80/IL18/ANXA1/HLA-DRA/HLA-DRB1/NCKAP1L	8
BP	GO:0051985	negative regulation of chromosome segregation	2.7251e-05	0.000212412	CENPF/CCNB1/RAD21/BUB1/NDC80/TRIP13/NUF2/BUB1B	8
BP	GO:0052372	modulation by symbiont of entry into host	2.7251e-05	0.000212412	TMPRSS4/LY6E/ITGAV/LGALS1/IFITM1/CD74/CXCL8/HLA-DRB1	8
BP	GO:1905819	negative regulation of chromosome separation	2.7251e-05	0.000212412	CENPF/CCNB1/RAD21/BUB1/NDC80/TRIP13/NUF2/BUB1B	8
BP	GO:0090077	foam cell differentiation	2.72831e-05	0.000212412	ITGAV/STAT1/IL18/PPARG/ABCA1/ITGB3/MSR1	7
BP	GO:0034612	response to tumor necrosis factor	2.76407e-05	0.000214842	CCL20/COL1A1/STAT1/CTSK/TNFRSF21/BIRC3/FAS/GBP2/CCL18/ANKRD1/CXCL8/TNFAIP3/KRT18/CCL2/SFRP1/CYP1B1/THBS1/PTGS2	18
BP	GO:0030856	regulation of epithelial cell differentiation	2.85551e-05	0.000221584	SFN/CEACAM1/CTNNB1/KLF7/STAT1/ID1/MMP9/ZEB1/LIF/IL1A/SFRP4/PAX6/TP63/SERPINE1	14
BP	GO:1902882	regulation of response to oxidative stress	2.87641e-05	0.000222839	MET/CTNNB1/DHFR/MMP3/TXN/ALOX5/GATA4/DDR2/HIF1A/VNN1/NR4A3	11
BP	GO:0061180	mammary gland epithelium development	2.88287e-05	0.000222854	PML/ERBB4/WNT5A/EPHA2/BRCA2/WNT2/ROBO1/AREG/HIF1A	9
BP	GO:0032967	positive regulation of collagen biosynthetic process	2.89077e-05	0.000222854	ITGA2/F2R/RUNX1/INHBA/PDGFRB/DDR2	6
BP	GO:0036296	response to increased oxygen levels	2.89077e-05	0.000222854	COL1A1/BNIP3/PDGFRB/PDPN/FAS/MMP2	6
CC	GO:0031527	filopodium membrane	3.47682e-05	0.000232947	ANTXR1/ITGA3/ITGAV/PDPN/ITGB3	5
BP	GO:0050921	positive regulation of chemotaxis	3.05114e-05	0.00023445	ITGA2/MET/WNT5A/CXCL12/BMPR2/PDGFRB/RARRES2/CXCL10/CD74/CXCL8/NCKAP1L/THBS1/SERPINE1	13
BP	GO:0061008	hepaticobiliary system development	3.05114e-05	0.00023445	ITGA2/MET/CEACAM1/PROX1/ACAT1/CIT/HPN/E2F7/XBP1/TYMS/ANXA1/TGFBR3/TNFAIP3	13
BP	GO:0055007	cardiac muscle cell differentiation	3.08535e-05	0.000236694	NOX4/EFNB2/ITGB1/PROX1/ACVR1/GREM1/FHL2/DKK1/SGCB/PDGFRB/CDK1/GATA4	12
BP	GO:0060560	developmental growth involved in morphogenesis	3.18174e-05	0.000243693	FN1/EFNA5/SEMA7A/EDNRA/CTTN/WNT5A/ITGB1/CXCL12/CTNNB1/BMPR2/PTK7/SFRP2/CRABP2/AREG/NEDD4L/SPP1/SFRP1	17
BP	GO:0071375	cellular response to peptide hormone stimulus	3.21987e-05	0.000246213	PKM/EDNRA/PRKCI/CEACAM1/PLAT/PDK4/INHBA/STAT1/CDC6/CCNA2/BRIP1/PPARG/XBP1/FBN1/RARRES2/ITGB3/DDR2/CYP1B1/NR4A3/NR4A2	20
BP	GO:1901186	positive regulation of ERBB signaling pathway	3.24181e-05	0.00024749	AGR2/RALA/MMP9/PLAUR/EGF/AREG/EREG	7
BP	GO:0010811	positive regulation of cell-substrate adhesion	3.34292e-05	0.000254796	FERMT1/FN1/AGR2/ITGA3/EDIL3/COL8A1/FLNA/THY1/SDC4/ITGA5/ITGB3/SFRP1	12
BP	GO:0071356	cellular response to tumor necrosis factor	3.35951e-05	0.000255648	CCL20/COL1A1/STAT1/CTSK/TNFRSF21/BIRC3/FAS/GBP2/CCL18/ANKRD1/CXCL8/TNFAIP3/KRT18/CCL2/SFRP1/CYP1B1/THBS1	17
BP	GO:0001841	neural tube formation	3.44002e-05	0.000260933	CTHRC1/RALA/WNT5A/STIL/PTK7/SFRP2/SDC4/TGFB2/HIF1A/ADM/SFRP1	11
BP	GO:0030593	neutrophil chemotaxis	3.44002e-05	0.000260933	LGALS3/CXCL5/CCL20/TNFAIP6/CXCL10/CCL18/CD74/TGFB2/CXCL8/NCKAP1L/CCL2	11
BP	GO:0060249	anatomical structure homeostasis	3.47697e-05	0.000263312	SLC2A1/NOX4/F2R/ITGB1/PDK4/PSEN1/CTNNB1/COMP/LYZ/COL3A1/CTSK/ALDH1A1/TNFRSF11B/LOX/AZGP1/TFRC/ITGB3/HIF1A/TNFAIP3/SPP1/PTGS2	21
BP	GO:0001906	cell killing	3.51495e-05	0.000265761	CD55/CEACAM1/GAPDH/BCL2L1/TAP2/LYZ/HLA-B/IL18/HLA-A/TUBB/AZGP1/HLA-DRA/HLA-DRB1/NCKAP1L/IL7R	15
BP	GO:0043367	CD4-positive, alpha-beta T cell differentiation	3.5533e-05	0.000268231	LEF1/TNFSF4/RUNX1/CD80/IL18/PTGER4/ANXA1/HLA-DRA/HLA-DRB1/NCKAP1L	10
CC	GO:0031256	leading edge membrane	4.08546e-05	0.000269238	FERMT1/ANTXR1/ITGB1/EZR/EPHA2/FAP/ITGAV/PAK1/SLC1A2/PDPN/CORO1C/THY1/ITGA5/ITGB3	14
BP	GO:0072132	mesenchyme morphogenesis	3.59552e-05	0.000269758	LEF1/WNT5A/ACVR1/ACTA2/MYC/ROBO1/TGFBR1/TGFB2	8
BP	GO:2000107	negative regulation of leukocyte apoptotic process	3.59552e-05	0.000269758	BCL2L1/CXCL12/EFNA1/IDO1/KITLG/CD74/HIF1A/IL7R	8
BP	GO:0010714	positive regulation of collagen metabolic process	3.60782e-05	0.000269758	ITGA2/F2R/RUNX1/INHBA/PDGFRB/DDR2	6
BP	GO:0030194	positive regulation of blood coagulation	3.60782e-05	0.000269758	PLAU/F2R/PLAT/APOH/THBS1/SERPINE1	6
BP	GO:1900048	positive regulation of hemostasis	3.60782e-05	0.000269758	PLAU/F2R/PLAT/APOH/THBS1/SERPINE1	6
BP	GO:1903319	positive regulation of protein maturation	3.60782e-05	0.000269758	ANXA2/MMP14/KLKB1/HPN/ENO1/MYH9	6
BP	GO:0002548	monocyte chemotaxis	3.63723e-05	0.000271097	LGALS3/GREM1/CXCL12/CCL20/ANXA1/CXCL10/CCL18/CCL2/SERPINE1	9
BP	GO:0003208	cardiac ventricle morphogenesis	3.63723e-05	0.000271097	COL11A1/EDNRA/PROX1/GATA4/SFRP2/TGFBR1/TGFBR3/TGFB2/HIF1A	9
BP	GO:0010038	response to metal ion	3.65962e-05	0.000272336	ECT2/SDC1/WNT5A/LOXL2/CRIP1/SLC25A12/MMP9/AQP1/GPI/BNIP3/CDK1/FIBIN/TNFRSF11B/IGFBP2/NDRG1/IL1A/TFRC/CYBB/HIF1A/FOSB/THBS1/PTGS2	22
BP	GO:0048639	positive regulation of developmental growth	3.73211e-05	0.000277293	FN1/EFNA5/AGR2/SEMA7A/ERBB4/PROX1/EZR/CXCL12/BMPR2/CDK1/WNT2/CRABP2/TGFBR3/NEDD4L	14
MF	GO:0061135	endopeptidase regulator activity	1.72715e-05	0.000277578	ANXA2/SPOCK1/GAPDH/COL6A3/TIMP2/BST2/TIMP1/TFPI2/SERPINH1/BIRC3/SFRP2/TFPI/SERPINA5/RARRES1/SERPINB2/SERPINE1	16
BP	GO:0003279	cardiac septum development	3.75586e-05	0.000278181	WNT5A/PROX1/ACVR1/PRDM1/BMPR2/PTK7/ROBO1/GATA4/TGFBR1/TGFBR3/TGFB2	11
BP	GO:0033045	regulation of sister chromatid segregation	3.75586e-05	0.000278181	CENPF/CCNB1/RAD21/DLGAP5/BUB1/NDC80/TRIP13/CDC6/NUF2/UBE2C/BUB1B	11
BP	GO:0017015	regulation of transforming growth factor beta receptor signaling pathway	3.79165e-05	0.000280392	FERMT1/ITGA3/PMEPA1/HTRA3/SKIL/ASPN/PPARG/ZEB1/FBN1/HTRA1/LOX/TGFBR3/THBS1	13
CC	GO:0001726	ruffle	4.34657e-05	0.000281826	FERMT1/CAPG/CTTN/ITGB1/EZR/EPHA2/FAP/ITGAV/PAK1/PDPN/CORO1C/MYH9/ITGA5/ITGB3	14
BP	GO:0002688	regulation of leukocyte chemotaxis	3.91452e-05	0.000289025	WNT5A/GREM1/CXCL12/TNFAIP6/RARRES2/CXCL10/CD74/CXCL8/NCKAP1L/CCL2/THBS1/SERPINE1	12
MF	GO:0008009	chemokine activity	1.86065e-05	0.000291944	CXCL12/CXCL5/CCL20/CXCL10/CCL18/CXCL14/CXCL8/CCL2	8
MF	GO:0023023	MHC protein complex binding	1.90304e-05	0.000291944	PKM/HLA-DRA/HLA-DQB1/CD74/HLA-DQA1/HLA-DPA1/HLA-DRB1	7
MF	GO:0019887	protein kinase regulator activity	1.9697e-05	0.000295454	EFNA5/SFN/ERBB4/TPX2/CAMK2N1/GREM1/CCNB1/CIT/CCNB2/BMPR2/CCNA2/EGF/AREG/CKS2/CXCL10/EREG/NCKAP1L	17
BP	GO:0035567	non-canonical Wnt signaling pathway	4.07306e-05	0.000299792	CTHRC1/WNT5A/DKK1/PTK7/RNF213/SFRP2/GPC3/SFRP4/SFRP1	9
BP	GO:0060411	cardiac septum morphogenesis	4.07306e-05	0.000299792	WNT5A/PROX1/ACVR1/BMPR2/ROBO1/GATA4/TGFBR1/TGFBR3/TGFB2	9
BP	GO:0010718	positive regulation of epithelial to mesenchymal transition	4.11104e-05	0.000301178	LEF1/LOXL2/ACVR1/CTNNB1/COL1A1/PDPN/TGFBR1/TGFB2	8
BP	GO:0033047	regulation of mitotic sister chromatid segregation	4.11104e-05	0.000301178	CENPF/CCNB1/RAD21/BUB1/NDC80/TRIP13/NUF2/BUB1B	8
BP	GO:0043370	regulation of CD4-positive, alpha-beta T cell differentiation	4.11104e-05	0.000301178	TNFSF4/RUNX1/CD80/IL18/ANXA1/HLA-DRA/HLA-DRB1/NCKAP1L	8
CC	GO:0030134	COPII-coated ER to Golgi transport vesicle	4.73816e-05	0.00030234	HLA-C/HLA-B/HLA-A/HLA-DRA/HLA-DQB1/AREG/CD74/HLA-DQA1/HLA-DPA1/HLA-DRB1	10
BP	GO:0031668	cellular response to extracellular stimulus	4.15951e-05	0.000304257	SLC2A1/POSTN/PDK4/NUAK1/EIF2AK2/COL1A1/BMPR2/BRIP1/SLC1A2/CTSK/XBP1/SFRP2/FAS/IFI16/CD68/DSC2/SFRP1/NR4A2	18
CC	GO:0042383	sarcolemma	4.99383e-05	0.000313675	SLC2A1/KRT19/ANXA2/ITGB1/BGN/PSEN1/COL6A3/SGCB/AQP1/CDH2/CORO1C/ANXA1	12
BP	GO:2000811	negative regulation of anoikis	4.31164e-05	0.000314897	CEACAM5/ITGB1/PDK4/NTRK2/ITGA5	5
BP	GO:0003156	regulation of animal organ formation	4.46082e-05	0.000324286	SULF1/WNT5A/CTNNB1/DKK1/WNT2/ROBO1	6
BP	GO:0010575	positive regulation of vascular endothelial growth factor production	4.46082e-05	0.000324286	SULF1/GATA4/IL1A/HIF1A/CYP1B1/PTGS2	6
BP	GO:0072012	glomerulus vasculature development	4.46082e-05	0.000324286	EDNRA/ACTA2/AQP1/PDGFRB/ANGPT2/ITGB3	6
BP	GO:0048839	inner ear development	4.47931e-05	0.000325129	COL11A1/CTHRC1/WNT5A/PROX1/MCOLN3/HPN/CCNA2/ZEB1/PTK7/PDGFRB/LGR5/PRRX1/SDC4/LRIG1/TGFB2	15
BP	GO:0002067	glandular epithelial cell differentiation	4.55222e-05	0.000328903	AGR2/WNT5A/PROX1/CTNNB1/NFIB/CDH2/PAX6/HIF1A/TP63	9
BP	GO:0046637	regulation of alpha-beta T cell differentiation	4.55222e-05	0.000328903	TNFSF4/RUNX1/CD80/PRDM1/IL18/ANXA1/HLA-DRA/HLA-DRB1/NCKAP1L	9
BP	GO:0061035	regulation of cartilage development	4.55222e-05	0.000328903	RUNX2/WNT5A/LOXL2/GREM1/CTNNB1/BMPR2/CTSK/BMP1/TGFBR1	9
BP	GO:0048593	camera-type eye morphogenesis	4.56899e-05	0.00032961	COL8A1/WNT5A/PROX1/EPHA2/CTNNB1/ZEB1/AQP1/NTRK2/WNT2/THY1/PAX6/HIF1A	12
BP	GO:1903844	regulation of cellular response to transforming growth factor beta stimulus	4.68427e-05	0.000337078	FERMT1/ITGA3/PMEPA1/HTRA3/SKIL/ASPN/PPARG/ZEB1/FBN1/HTRA1/LOX/TGFBR3/THBS1	13
BP	GO:0043388	positive regulation of DNA binding	4.68679e-05	0.000337078	ITGA2/CTNNB1/PPARG/MMP9/PLAUR/EGF/TXN/PAX6	8
BP	GO:0002449	lymphocyte mediated immunity	4.88129e-05	0.000350532	CD55/TNFSF4/CEACAM1/AHR/CLU/TAP2/HLA-B/IL18/HLA-A/TUBB/AZGP1/HLA-DRA/HLA-DQB1/TFRC/C1S/CD74/C1R/HLA-DQA1/HLA-DPA1/HLA-DRB1/NCKAP1L/IL7R	22
BP	GO:1990266	neutrophil migration	4.93034e-05	0.000353516	LGALS3/CXCL5/CCL20/TNFAIP6/CXCL10/IL1A/CCL18/CD74/TGFB2/CXCL8/NCKAP1L/CCL2	12
BP	GO:0009952	anterior/posterior pattern specification	5.03702e-05	0.000360617	LEF1/BTG2/WNT5A/BHLHE40/PSEN1/HHEX/CTNNB1/DKK1/BMPR2/WNT2/GATA4/SFRP2/TGFBR1/GPC3/PAX6/SFRP1	16
BP	GO:0001736	establishment of planar polarity	5.07813e-05	0.000361913	CTHRC1/ERBB4/WNT5A/DKK1/PTK7/SFRP2/GPC3/TP63/SFRP1	9
BP	GO:0007164	establishment of tissue polarity	5.07813e-05	0.000361913	CTHRC1/ERBB4/WNT5A/DKK1/PTK7/SFRP2/GPC3/TP63/SFRP1	9
BP	GO:0042058	regulation of epidermal growth factor receptor signaling pathway	5.07813e-05	0.000361913	AGR2/RALA/CEACAM1/PSEN1/MMP9/PLAUR/EGF/AREG/EREG	9
BP	GO:0009205	purine ribonucleoside triphosphate metabolic process	5.12948e-05	0.000365021	PKM/HK2/ENO2/PGK1/HK1/GAPDH/PFKP/LDHA/PSEN1/AK4/NT5E/SLC25A12/ENO1/ALDOC/GPI/SLC4A4/HIF1A	17
BP	GO:0001656	metanephros development	5.22935e-05	0.000371009	ACAT1/GREM1/CTNNB1/STAT1/MYC/AQP1/PDGFRB/FBN1/LIF/GPC3	10
BP	GO:0001843	neural tube closure	5.22935e-05	0.000371009	CTHRC1/RALA/WNT5A/STIL/PTK7/SFRP2/SDC4/TGFB2/ADM/SFRP1	10
BP	GO:0014066	regulation of phosphatidylinositol 3-kinase signaling	5.28198e-05	0.000374152	FN1/ERBB4/F2R/CEACAM1/PDGFC/IL18/NTRK2/PDGFRB/EGF/TGFB2/DCN	11
BP	GO:0060346	bone trabecula formation	5.29745e-05	0.000374152	GREM1/COL1A1/MMP2/SFRP1	4
BP	GO:0072203	cell proliferation involved in metanephros development	5.29745e-05	0.000374152	STAT1/MYC/PDGFRB/GPC3	4
BP	GO:0009141	nucleoside triphosphate metabolic process	5.32109e-05	0.000375202	PKM/HK2/ENO2/PGK1/HK1/GAPDH/PFKP/LDHA/PSEN1/AK4/NT5E/SLC25A12/ENO1/ALDOC/GPI/TYMS/SLC4A4/HIF1A	18
BP	GO:0060350	endochondral bone morphogenesis	5.32821e-05	0.000375202	RUNX2/MMP14/COL1A1/COMP/COL3A1/BMPR2/SERPINH1/MMP13	8
BP	GO:1902230	negative regulation of intrinsic apoptotic signaling pathway in response to DNA damage	5.46799e-05	0.00038447	BCL2L1/CXCL12/CLU/SFRP2/MUC1/CD74	6
BP	GO:0030178	negative regulation of Wnt signaling pathway	5.48825e-05	0.000385321	FERMT1/CTHRC1/WNT5A/GREM1/CTNNB1/DKK1/CDH2/RNF213/IGFBP2/SFRP2/LRP1/GPC3/SFRP4/SFRP1	14
MF	GO:0008191	metalloendopeptidase inhibitor activity	2.63397e-05	0.000386507	SPOCK1/TIMP2/BST2/TIMP1/RARRES1	5
BP	GO:0002366	leukocyte activation involved in immune response	5.61702e-05	0.000393775	LGALS3/LEF1/TNFSF4/CEACAM1/PSEN1/CD80/IL18/PTGER4/LGALS1/XBP1/NMI/ANXA1/HLA-DRA/TFRC/CD74/CDH17/HLA-DRB1/NCKAP1L/NR4A3	19
MF	GO:0004866	endopeptidase inhibitor activity	2.79107e-05	0.000400845	ANXA2/SPOCK1/GAPDH/COL6A3/TIMP2/BST2/TIMP1/TFPI2/SERPINH1/BIRC3/TFPI/SERPINA5/RARRES1/SERPINB2/SERPINE1	15
BP	GO:0060606	tube closure	5.7405e-05	0.000401261	CTHRC1/RALA/WNT5A/STIL/PTK7/SFRP2/SDC4/TGFB2/ADM/SFRP1	10
BP	GO:0061298	retina vasculature development in camera-type eye	5.7408e-05	0.000401261	BMPR2/PDGFRB/COL4A1/HIF1A/CYP1B1	5
CC	GO:0030016	myofibril	6.57657e-05	0.000406736	SLC2A1/KRT19/TPM4/PSEN1/CTNNB1/FHL2/CALD1/TPM2/FLNA/ENO1/PAK1/CORO1C/DST/MMP2/SDC4/ANKRD1	16
BP	GO:0043583	ear development	5.93185e-05	0.00041339	COL11A1/CTHRC1/EDNRA/WNT5A/PROX1/MCOLN3/HPN/CCNA2/ZEB1/PTK7/PDGFRB/LGR5/PRRX1/SDC4/LRIG1/TGFB2	16
BP	GO:0050866	negative regulation of cell activation	5.93185e-05	0.00041339	LGALS3/TNFSF4/CEACAM1/RUNX1/INHBA/CD80/TNFRSF21/PDCD1LG2/ANXA1/IDO1/SDC4/CD74/TNFAIP3/HLA-DRB1/NCKAP1L/SFRP1	16
BP	GO:0045862	positive regulation of proteolysis	5.96531e-05	0.000415108	ANTXR1/FN1/EGLN3/ANXA2/MMP14/PML/F2R/KLKB1/PSEN1/CLU/HPN/ENO1/MYC/PPARG/EGF/EFNA1/MYH9/ROBO1/SFRP2/FAS/IFI16/TNFSF10	22
BP	GO:0001755	neural crest cell migration	6.04106e-05	0.000418528	FN1/SEMA7A/EDNRA/ERBB4/ACVR1/CORO1C/KITLG/HIF1A	8
BP	GO:0007566	embryo implantation	6.04106e-05	0.000418528	MMP9/TIMP1/IGFBP7/LIF/MMP2/ITGB3/SPP1/PTGS2	8
BP	GO:0043903	regulation of biological process involved in symbiotic interaction	6.04106e-05	0.000418528	TMPRSS4/LY6E/ITGAV/LGALS1/IFITM1/CD74/CXCL8/HLA-DRB1	8
MF	GO:0008022	protein C-terminus binding	2.9782e-05	0.00041881	FN1/SDC1/CENPF/ECM1/EZR/TOP2A/MKI67/CTNNB1/XRCC4/ID1/BRCA2/PPARG/GPSM2/DST/TNFAIP3	15
BP	GO:0003018	vascular process in circulatory system	6.14849e-05	0.000424117	SLC2A1/SLC6A6/SLC7A2/EDNRA/F2R/CEACAM1/ACTA2/COMP/BMPR2/SLC1A2/MMP2/LRP1/SLC4A4/TFRC/SLC2A3/ADM/HBB/PTGS2	18
BP	GO:0014911	positive regulation of smooth muscle cell migration	6.15337e-05	0.000424117	ITGA2/IGFBP5/PDGFRB/ITGB3/DDR2/CYP1B1/NR4A3	7
BP	GO:0050729	positive regulation of inflammatory response	6.15561e-05	0.000424117	ITGA2/TNFSF4/WNT5A/CAMK2N1/PDCD4/IL18/PTGER4/LGALS1/NMI/IDO1/OSMR/PTGS2/SERPINE1	13
BP	GO:0002702	positive regulation of production of molecular mediator of immune response	6.16668e-05	0.000424117	SEMA7A/CD55/TNFSF4/WNT5A/HK1/IL18/HLA-A/XBP1/GPI/TFRC/CD74/NR4A3	12
BP	GO:0030168	platelet activation	6.16668e-05	0.000424117	FN1/CLIC1/F2R/CEACAM1/COMP/FLNA/COL3A1/PDPN/MYH9/ITGB3/HBB/MMRN1	12
BP	GO:0001937	negative regulation of endothelial cell proliferation	6.28478e-05	0.000430958	SULF1/STAT1/PPARG/SPARC/ALOX5/TGFBR1/APOH/CCL2/THBS1	9
BP	GO:0022404	molting cycle process	6.29356e-05	0.000430958	FERMT1/WNT5A/INHBA/IGFBP5/CTNNB1/DKK1/LGR5/LRIG1/TGFB2/TP63	10
BP	GO:0022405	hair cycle process	6.29356e-05	0.000430958	FERMT1/WNT5A/INHBA/IGFBP5/CTNNB1/DKK1/LGR5/LRIG1/TGFB2/TP63	10
BP	GO:0010876	lipid localization	6.35102e-05	0.000434263	SLC2A1/ANXA2/CEACAM1/SQLE/INHBA/ITGAV/CLU/VLDLR/PPARG/EGF/RNF213/ANXA1/HILPDA/LRP1/CRABP2/APOH/ABCA1/SERPINA5/IL1A/ITGB3/MSR1/CFTR/SPP1/THBS1/PTGS2/AQP9	26
BP	GO:0051099	positive regulation of binding	6.61027e-05	0.000450717	ITGA2/CTHRC1/ANXA2/MET/WNT5A/PSEN1/CTNNB1/PPARG/MMP9/PLAUR/EGF/TXN/LRP1/PAX6	14
BP	GO:0009144	purine nucleoside triphosphate metabolic process	6.61513e-05	0.000450717	PKM/HK2/ENO2/PGK1/HK1/GAPDH/PFKP/LDHA/PSEN1/AK4/NT5E/SLC25A12/ENO1/ALDOC/GPI/SLC4A4/HIF1A	17
BP	GO:0001916	positive regulation of T cell mediated cytotoxicity	6.64899e-05	0.000450717	TAP2/HLA-B/HLA-A/AZGP1/HLA-DRA/HLA-DRB1	6
BP	GO:0033688	regulation of osteoblast proliferation	6.64899e-05	0.000450717	CTHRC1/GREM1/ITGAV/EIF2AK2/ITGB3/SFRP1	6
BP	GO:0061437	renal system vasculature development	6.64899e-05	0.000450717	EDNRA/ACTA2/AQP1/PDGFRB/ANGPT2/ITGB3	6
BP	GO:0061440	kidney vasculature development	6.64899e-05	0.000450717	EDNRA/ACTA2/AQP1/PDGFRB/ANGPT2/ITGB3	6
BP	GO:0032465	regulation of cytokinesis	6.8913e-05	0.000466473	ECT2/BCL2L1/RACGAP1/KIF23/CIT/PRC1/E2F7/BRCA2/CDC6/KIF14	10
BP	GO:0005996	monosaccharide metabolic process	6.9541e-05	0.000469377	SLC2A1/IGFBP3/PKM/HK2/ENO2/PGK1/GALE/HK1/GAPDH/PFKP/PDK4/PGM2/SLC25A12/ENO1/ALDOC/GPI/SLC2A3	17
BP	GO:0042593	glucose homeostasis	6.9541e-05	0.000469377	NOX4/EFNA5/HK2/HK1/PDK4/IGFBP5/KLF7/PPARG/XBP1/GPI/ALOX5/GATA4/PYGL/PAX6/HIF1A/CFTR/HLA-DRB1	17
MF	GO:0008083	growth factor activity	3.4391e-05	0.000473754	INHBA/CXCL12/PDGFC/DKK1/BMP1/GPI/EGF/TIMP1/LIF/KITLG/MACC1/AREG/TGFB2/EREG	14
BP	GO:0009199	ribonucleoside triphosphate metabolic process	7.30828e-05	0.000490775	PKM/HK2/ENO2/PGK1/HK1/GAPDH/PFKP/LDHA/PSEN1/AK4/NT5E/SLC25A12/ENO1/ALDOC/GPI/SLC4A4/HIF1A	17
BP	GO:0033500	carbohydrate homeostasis	7.30828e-05	0.000490775	NOX4/EFNA5/HK2/HK1/PDK4/IGFBP5/KLF7/PPARG/XBP1/GPI/ALOX5/GATA4/PYGL/PAX6/HIF1A/CFTR/HLA-DRB1	17
BP	GO:0035710	CD4-positive, alpha-beta T cell activation	7.31274e-05	0.000490775	LEF1/CD55/TNFSF4/RUNX1/CD80/IL18/PTGER4/ANXA1/HLA-DRA/HLA-DRB1/NCKAP1L	11
BP	GO:0046634	regulation of alpha-beta T cell activation	7.31274e-05	0.000490775	CD55/TNFSF4/RUNX1/CD80/PRDM1/IL18/HLA-A/ANXA1/HLA-DRA/HLA-DRB1/NCKAP1L	11
BP	GO:0002706	regulation of lymphocyte mediated immunity	7.46497e-05	0.00050028	CD55/TNFSF4/CEACAM1/AHR/TAP2/HLA-B/IL18/HLA-A/AZGP1/HLA-DRA/TFRC/HLA-DRB1/NCKAP1L/IL7R	14
BP	GO:0002396	MHC protein complex assembly	7.50966e-05	0.000500978	HLA-DRA/HLA-DQB1/HLA-DQA1/HLA-DPA1/HLA-DRB1	5
BP	GO:0002501	peptide antigen assembly with MHC protein complex	7.50966e-05	0.000500978	HLA-DRA/HLA-DQB1/HLA-DQA1/HLA-DPA1/HLA-DRB1	5
BP	GO:0072376	protein activation cascade	7.50966e-05	0.000500978	FN1/RASAL2/KLKB1/FLNA/APOH	5
BP	GO:0014033	neural crest cell differentiation	7.5366e-05	0.000500978	FN1/SEMA7A/EDNRA/ERBB4/ACVR1/CDH2/CORO1C/KITLG/HIF1A/SFRP1	10
BP	GO:0061097	regulation of protein tyrosine kinase activity	7.5366e-05	0.000500978	NOX4/ERBB4/GREM1/PSEN1/EGF/EFNA1/THY1/AREG/ITGB3/EREG	10
BP	GO:0022408	negative regulation of cell-cell adhesion	7.53909e-05	0.000500978	LGALS3/TNFSF4/CEACAM1/RUNX1/CXCL12/CD80/TNFRSF21/PDCD1LG2/ANXA1/IDO1/SDC4/CD74/HLA-DRB1/NCKAP1L/EPCAM	15
BP	GO:0071695	anatomical structure maturation	7.67826e-05	0.000509508	FERMT1/RUNX2/EDNRA/WNT5A/GREM1/CTNNB1/TRIP13/BRCA2/PPARG/KIF14/TYMS/MMP2/TGFB2/HIF1A/EREG/CFTR/NR4A2	17
BP	GO:0060135	maternal process involved in female pregnancy	7.70588e-05	0.000510623	ITGA3/CTSB/PRDM1/BMPR2/ANGPT2/LIF/SPP1/PTGS2	8
BP	GO:0050772	positive regulation of axonogenesis	7.72422e-05	0.00051112	FN1/EFNA5/SEMA7A/CXCL12/SKIL/BMPR2/NTRK2/ROBO1/CRABP2	9
BP	GO:0001894	tissue homeostasis	7.78243e-05	0.00051425	SLC2A1/NOX4/F2R/ITGB1/PDK4/CTNNB1/COMP/LYZ/COL3A1/CTSK/ALDH1A1/TNFRSF11B/AZGP1/TFRC/ITGB3/TNFAIP3/SPP1/PTGS2	18
BP	GO:0035265	organ growth	7.92731e-05	0.000523092	ERBB4/RUNX1/PROX1/ECM1/COMP/PDGFRB/CDK1/WNT2/GATA4/MMP13/TGFBR1/TGFBR3/DDR2/TGFB2	14
BP	GO:0010743	regulation of macrophage derived foam cell differentiation	8.02494e-05	0.000528795	ITGAV/IL18/PPARG/ABCA1/ITGB3/MSR1	6
BP	GO:0044848	biological phase	8.17266e-05	0.000536281	FERMT1/WNT5A/CTNNB1/TGFB2	4
BP	GO:0051256	mitotic spindle midzone assembly	8.17266e-05	0.000536281	RACGAP1/KIF23/PRC1/KIF4A	4
BP	GO:0090179	planar cell polarity pathway involved in neural tube closure	8.17266e-05	0.000536281	WNT5A/PTK7/SFRP2/SFRP1	4
BP	GO:1904019	epithelial cell apoptotic process	8.22543e-05	0.000538248	LEF1/EDNRA/PRKCI/BCL2L1/PDCD4/BMPR2/SFRP4/TNFAIP3/KRT18/CCL2/THBS1/SERPINE1	12
BP	GO:0007094	mitotic spindle assembly checkpoint signaling	8.25968e-05	0.000538248	CENPF/CCNB1/BUB1/NDC80/TRIP13/NUF2/BUB1B	7
BP	GO:0071173	spindle assembly checkpoint signaling	8.25968e-05	0.000538248	CENPF/CCNB1/BUB1/NDC80/TRIP13/NUF2/BUB1B	7
BP	GO:0071174	mitotic spindle checkpoint signaling	8.25968e-05	0.000538248	CENPF/CCNB1/BUB1/NDC80/TRIP13/NUF2/BUB1B	7
BP	GO:2000273	positive regulation of signaling receptor activity	8.25968e-05	0.000538248	ITGB1/GREM1/EGF/AREG/HIF1A/EREG/CCL2	7
BP	GO:0002720	positive regulation of cytokine production involved in immune response	8.54191e-05	0.000555107	SEMA7A/CD55/TNFSF4/WNT5A/HK1/IL18/HLA-A/CD74/NR4A3	9
BP	GO:2000514	regulation of CD4-positive, alpha-beta T cell activation	8.54191e-05	0.000555107	CD55/TNFSF4/RUNX1/CD80/IL18/ANXA1/HLA-DRA/HLA-DRB1/NCKAP1L	9
BP	GO:0046632	alpha-beta T cell differentiation	8.55708e-05	0.000555327	LEF1/TNFSF4/RUNX1/CD80/PRDM1/IL18/PTGER4/ANXA1/HLA-DRA/HLA-DRB1/NCKAP1L	11
MF	GO:0019955	cytokine binding	4.13711e-05	0.00055851	ITGB1/ACVR1/GREM1/ITGAV/COMP/BMPR2/PDPN/TGFBR1/OSMR/TGFBR3/CD74/ITGB3/THBS1	13
BP	GO:0031102	neuron projection regeneration	8.67116e-05	0.000561958	FLNA/DHFR/PRRX1/THY1/MMP2/ADM/SPP1/TNC	8
BP	GO:1990868	response to chemokine	8.98213e-05	0.000580517	CXCL12/CXCL5/CCL20/ROBO1/LOX/CXCL10/CCL18/HIF1A/CXCL8/CCL2	10
BP	GO:1990869	cellular response to chemokine	8.98213e-05	0.000580517	CXCL12/CXCL5/CCL20/ROBO1/LOX/CXCL10/CCL18/HIF1A/CXCL8/CCL2	10
BP	GO:0051017	actin filament bundle assembly	9.11096e-05	0.000588037	MET/ITGB5/PLS3/EZR/CALD1/DPYSL3/FLNA/PAK1/ID1/PTGER4/TGFBR1/SDC4/SFRP1	13
BP	GO:0002718	regulation of cytokine production involved in immune response	9.24431e-05	0.000595016	SEMA7A/CD55/TNFSF4/WNT5A/HK1/IL18/HLA-A/BST2/CD74/TGFB2/NR4A3	11
BP	GO:0071346	cellular response to interferon-gamma	9.24431e-05	0.000595016	WNT5A/GAPDH/CCL20/STAT1/PPARG/NMI/GBP2/MRC1/CCL18/HLA-DPA1/CCL2	11
BP	GO:0003151	outflow tract morphogenesis	9.43106e-05	0.000603741	EDNRA/WNT5A/CTNNB1/BMPR2/ROBO1/SFRP2/TGFBR3/TGFB2/HIF1A	9
BP	GO:0070227	lymphocyte apoptotic process	9.43106e-05	0.000603741	LGALS3/WNT5A/TNFRSF21/EFNA1/FAS/IDO1/CD74/HIF1A/IL7R	9
BP	GO:1901184	regulation of ERBB signaling pathway	9.43106e-05	0.000603741	AGR2/RALA/CEACAM1/PSEN1/MMP9/PLAUR/EGF/AREG/EREG	9
BP	GO:1903201	regulation of oxidative stress-induced cell death	9.43106e-05	0.000603741	MET/CTNNB1/MMP3/TXN/GATA4/DDR2/HIF1A/VNN1/NR4A3	9
MF	GO:0042379	chemokine receptor binding	4.57736e-05	0.000605828	CXCL12/CXCL5/CCL20/STAT1/CXCL10/CCL18/CXCL14/CXCL8/CCL2	9
CC	GO:0000940	outer kinetochore	0.000101085	0.000606512	CENPF/CCNB1/NDC80/BUB1B	4
CC	GO:0043256	laminin complex	0.000101085	0.000606512	LAMC2/LAMB3/LAMA3/LAMB1	4
BP	GO:0031577	spindle checkpoint signaling	9.51413e-05	0.000608234	CENPF/CCNB1/BUB1/NDC80/TRIP13/NUF2/BUB1B	7
BP	GO:0002828	regulation of type 2 immune response	9.61846e-05	0.000613242	TNFSF4/ECM1/IL18/ANXA1/IDO1/CD74	6
BP	GO:0090279	regulation of calcium ion import	9.61846e-05	0.000613242	LGALS3/CXCL12/CTNNB1/PDGFRB/EGF/CCL2	6
BP	GO:0061326	renal tubule development	9.78884e-05	0.000623262	ACAT1/GREM1/CTNNB1/STAT1/MYC/AQP1/LGR5/COL4A1/LIF/GPC3	10
BP	GO:0034284	response to monosaccharide	9.9282e-05	0.000631283	ITGA2/NOX4/RUNX2/EFNA5/RASAL2/KLF7/XBP1/ANGPT2/GATA4/IL1A/HIF1A/CFTR/HLA-DRB1/THBS1/PTGS2	15
BP	GO:0048638	regulation of developmental growth	9.98717e-05	0.000634179	FN1/EFNA5/AGR2/SEMA7A/PLAC8/ERBB4/CTTN/WNT5A/RUNX1/PROX1/EZR/CXCL12/BMPR2/CDK1/WNT2/TGFBR1/CRABP2/TGFBR3/NEDD4L/SPP1	20
BP	GO:0001570	vasculogenesis	0.000103965	0.00065882	CEACAM1/EPHA2/CTNNB1/ITGAV/NTRK2/PDGFRB/ITGB8/TGFBR3/ADM	9
BP	GO:0002440	production of molecular mediator of immune response	0.000104032	0.00065882	SEMA7A/CD55/TNFSF4/WNT5A/HK1/XRCC4/IL18/HLA-A/BST2/XBP1/GPI/HLA-DRA/HLA-DQB1/TFRC/CD74/TGFB2/HLA-DQA1/HLA-DPA1/HLA-DRB1/NR4A3	20
BP	GO:0003002	regionalization	0.000106025	0.000670545	LEF1/BTG2/WNT5A/ACVR1/BHLHE40/GREM1/PSEN1/HHEX/CTNNB1/DKK1/BMPR2/BMP1/WNT2/ROBO1/GATA4/SFRP2/TGFBR1/GPC3/PAX6/TP63/SFRP1	21
BP	GO:0097306	cellular response to alcohol	0.000106561	0.00067303	EFNA5/TNFSF4/INHBA/CTNNB1/AHR/PTGER4/CYBB/CFTR/SFRP1/CYP1B1	10
BP	GO:0002367	cytokine production involved in immune response	0.000107611	0.000678756	SEMA7A/CD55/TNFSF4/WNT5A/HK1/IL18/HLA-A/BST2/CD74/TGFB2/NR4A3	11
BP	GO:0090090	negative regulation of canonical Wnt signaling pathway	0.000108505	0.000683481	FERMT1/CTHRC1/WNT5A/GREM1/CTNNB1/DKK1/CDH2/IGFBP2/SFRP2/GPC3/SFRP4/SFRP1	12
BP	GO:0050918	positive chemotaxis	0.000109036	0.000684082	ITGA2/LGALS3/MET/WNT5A/CXCL12/ANGPT2/CXCL10/CXCL8	8
BP	GO:0051893	regulation of focal adhesion assembly	0.000109036	0.000684082	EFNA5/MMP14/GREM1/CORO1C/THY1/SDC4/SFRP1/THBS1	8
BP	GO:0090109	regulation of cell-substrate junction assembly	0.000109036	0.000684082	EFNA5/MMP14/GREM1/CORO1C/THY1/SDC4/SFRP1/THBS1	8
BP	GO:0035850	epithelial cell differentiation involved in kidney development	0.000109194	0.000684165	EDNRA/GREM1/CTNNB1/ACTA2/STAT1/MMP9/LIF	7
BP	GO:0007389	pattern specification process	0.000113045	0.000707353	LEF1/ERBB4/BTG2/WNT5A/ACVR1/BHLHE40/GREM1/PSEN1/HHEX/CTNNB1/DKK1/STIL/BMPR2/ZEB1/BMP1/WNT2/ROBO1/GATA4/SFRP2/TGFBR1/GPC3/PAX6/HIF1A/TP63/SFRP1	25
BP	GO:0000086	G2/M transition of mitotic cell cycle	0.000116093	0.000725464	CENPF/MELK/CCNB1/RAD21/CIT/CHEK1/CDC6/DTL/CCNA2/KIF14/CDK1/WEE1	12
BP	GO:0061572	actin filament bundle organization	0.000117031	0.000730359	MET/ITGB5/PLS3/EZR/CALD1/DPYSL3/FLNA/PAK1/ID1/PTGER4/TGFBR1/SDC4/SFRP1	13
CC	GO:0051233	spindle midzone	0.000124816	0.000737884	CTTN/RACGAP1/PRC1/CDC6/KIF14/GEM	6
BP	GO:0002700	regulation of production of molecular mediator of immune response	0.000119206	0.000742952	SEMA7A/CD55/TNFSF4/WNT5A/HK1/IL18/HLA-A/BST2/XBP1/GPI/TFRC/CD74/TGFB2/NR4A3	14
BP	GO:0000022	mitotic spindle elongation	0.000120355	0.000744211	RACGAP1/KIF23/PRC1/KIF4A	4
BP	GO:0003337	mesenchymal to epithelial transition involved in metanephros morphogenesis	0.000120355	0.000744211	GREM1/CTNNB1/STAT1/LIF	4
BP	GO:0038063	collagen-activated tyrosine kinase receptor signaling pathway	0.000120355	0.000744211	COL1A1/COL4A2/COL4A1/DDR2	4
BP	GO:0071372	cellular response to follicle-stimulating hormone stimulus	0.000120355	0.000744211	EFNA5/EDNRA/PLAT/INHBA	4
BP	GO:0090178	regulation of establishment of planar polarity involved in neural tube closure	0.000120355	0.000744211	WNT5A/PTK7/SFRP2/SFRP1	4
BP	GO:0097084	vascular associated smooth muscle cell development	0.000120355	0.000744211	EDNRA/COMP/SGCB/ADM	4
BP	GO:0031100	animal organ regeneration	0.000121863	0.00075255	CXCL12/CCNA2/CDK1/TYMS/ANGPT2/TGFBR3/ADM/NR4A3	8
BP	GO:0034104	negative regulation of tissue remodeling	0.000122779	0.00075328	GREM1/PPARG/TNFRSF11B/TNFAIP3/SFRP1	5
BP	GO:0035313	wound healing, spreading of epidermal cells	0.000122779	0.00075328	FERMT1/ITGB1/MMP12/COL5A1/ITGA5	5
BP	GO:0072111	cell proliferation involved in kidney development	0.000122779	0.00075328	STAT1/MYC/PDGFRB/GPC3/ITGB3	5
BP	GO:0072574	hepatocyte proliferation	0.000122779	0.00075328	CEACAM1/PROX1/HPN/XBP1/TNFAIP3	5
BP	GO:0072575	epithelial cell proliferation involved in liver morphogenesis	0.000122779	0.00075328	CEACAM1/PROX1/HPN/XBP1/TNFAIP3	5
CC	GO:0000793	condensed chromosome	0.000130701	0.000761476	FANCD2/CENPF/TOP2A/CCNB1/PSEN1/MKI67/RAD21/SMC4/XPO1/BUB1/NEK2/NDC80/CHEK1/BRCA2/SMC6/NUF2/BUB1B	17
BP	GO:0014032	neural crest cell development	0.000125772	0.000770637	FN1/SEMA7A/EDNRA/ERBB4/ACVR1/CDH2/CORO1C/KITLG/HIF1A	9
BP	GO:0006006	glucose metabolic process	0.000126139	0.000771884	IGFBP3/PKM/HK2/ENO2/PGK1/HK1/GAPDH/PFKP/PDK4/PGM2/SLC25A12/ENO1/ALDOC/GPI	14
BP	GO:0007411	axon guidance	0.000128379	0.000784253	LAMC2/LAMA3/EFNA5/SEMA7A/EDNRA/EFNB2/WNT5A/ETV1/EPHA2/CXCL12/KLF7/NFIB/BMPR2/EFNA1/ROBO1/PAX6	16
BP	GO:0032956	regulation of actin cytoskeleton organization	0.000128493	0.000784253	EFNA5/ECT2/CAPG/MET/CTTN/PROX1/CXCL12/CIT/FLNA/PAK1/ID1/PTGER4/BST2/PDGFRB/TGFBR1/LRP1/SDC4/IL1A/ITGB3/NCKAP1L/SFRP1	21
CC	GO:0030175	filopodium	0.000140788	0.000808528	ANTXR1/ITGA3/ITGB1/EZR/ITGAV/ACTA2/PDPN/MSN/KITLG/ITGB3	10
BP	GO:0071482	cellular response to light stimulus	0.000134321	0.000818766	CRIP1/CHEK1/MYC/MMP9/AQP1/TIMP1/MMP3/MMP2/MMP1/MME/PTGS2	11
BP	GO:0034764	positive regulation of transmembrane transport	0.000134816	0.000819665	CEMIP/EDNRA/PRKCI/F2R/ITGB1/PSEN1/ARL6IP1/FLNA/SLC1A2/THY1/GPC3/CXCL10/GLRX/CFTR/CCL2/NR4A3	16
BP	GO:0097485	neuron projection guidance	0.000134816	0.000819665	LAMC2/LAMA3/EFNA5/SEMA7A/EDNRA/EFNB2/WNT5A/ETV1/EPHA2/CXCL12/KLF7/NFIB/BMPR2/EFNA1/ROBO1/PAX6	16
BP	GO:0001893	maternal placenta development	0.000135561	0.000821022	CTSB/PRDM1/BMPR2/LIF/SPP1/PTGS2	6
BP	GO:0048048	embryonic eye morphogenesis	0.000135561	0.000821022	WNT5A/PROX1/ZEB1/FBN1/MFAP5/PAX6	6
BP	GO:0071425	hematopoietic stem cell proliferation	0.000135561	0.000821022	WNT5A/RUNX1/EIF2AK2/BRCA2/SFRP2/KITLG	6
BP	GO:0045639	positive regulation of myeloid cell differentiation	0.000136577	0.000825059	LEF1/RUNX1/INHBA/STAT1/LIF/KITLG/CD74/HIF1A/HLA-DRB1/NCKAP1L	10
BP	GO:0070167	regulation of biomineral tissue development	0.000136577	0.000825059	ACVR1/ECM1/GREM1/COMP/ASPN/BMPR2/ALOX5/DDR2/HIF1A/CFTR	10
MF	GO:0030296	protein tyrosine kinase activator activity	6.44627e-05	0.000836775	EFNA5/ERBB4/GREM1/EGF/AREG/EREG	6
BP	GO:0046660	female sex differentiation	0.000144393	0.000871157	MMP14/WNT5A/BCL2L1/INHBA/BRCA2/TNFAIP6/MMP2/KITLG/TP63/EREG/SFRP1	11
BP	GO:0055001	muscle cell development	0.000149074	0.000898251	KRT19/SDC1/EDNRA/ITGB1/PROX1/FHL2/COMP/SGCB/PDGFRB/CDK1/GATA4/LOX/ANKRD1/ADM	14
BP	GO:0007405	neuroblast proliferation	0.000151267	0.000910304	LEF1/ITGB1/PROX1/RACGAP1/CTNNB1/ASPM/PAX6/HIF1A	8
BP	GO:0003283	atrial septum development	0.000153923	0.000921584	WNT5A/ACVR1/BMPR2/GATA4/TGFB2	5
BP	GO:0051383	kinetochore organization	0.000153923	0.000921584	CENPF/DLGAP5/SMC4/NDC80/NUF2	5
BP	GO:0072576	liver morphogenesis	0.000153923	0.000921584	CEACAM1/PROX1/HPN/XBP1/TNFAIP3	5
BP	GO:0097150	neuronal stem cell population maintenance	0.000153923	0.000921584	FANCD2/PROX1/ASPM/CDH2/PRRX1	5
BP	GO:0001569	branching involved in blood vessel morphogenesis	0.000159529	0.000951527	LEF1/EDNRA/ACVR1/CTNNB1/SFRP2/COL4A1	6
BP	GO:0030224	monocyte differentiation	0.000159529	0.000951527	MYC/PPARG/MYH9/IFI16/CD74/HLA-DRB1	6
BP	GO:0033687	osteoblast proliferation	0.000159529	0.000951527	CTHRC1/GREM1/ITGAV/EIF2AK2/ITGB3/SFRP1	6
BP	GO:0110149	regulation of biomineralization	0.000160318	0.000955023	ACVR1/ECM1/GREM1/COMP/ASPN/BMPR2/ALOX5/DDR2/HIF1A/CFTR	10
BP	GO:0001818	negative regulation of cytokine production	0.000160942	0.000957531	FN1/LEF1/PML/TNFSF4/CEACAM1/EZR/INHBA/EPHA2/PDCD4/PTGER4/BST2/TNFRSF21/NMI/PDCD1LG2/ANXA1/IDO1/TGFB2/TNFAIP3/HLA-DRB1/NCKAP1L/THBS1	21
BP	GO:0002704	negative regulation of leukocyte mediated immunity	0.000168025	0.000997159	CD55/CEACAM1/AHR/HLA-B/HLA-A/BST2/NCKAP1L/IL7R	8
BP	GO:0042093	T-helper cell differentiation	0.000168025	0.000997159	LEF1/TNFSF4/CD80/IL18/PTGER4/ANXA1/HLA-DRA/HLA-DRB1	8
CC	GO:0032154	cleavage furrow	0.000177078	0.00100261	ECT2/RALA/ITGB1/RACGAP1/CIT/MYLK/MYH9	7
BP	GO:0010745	negative regulation of macrophage derived foam cell differentiation	0.000170678	0.0010091	ITGAV/PPARG/ABCA1/ITGB3	4
BP	GO:0061430	bone trabecula morphogenesis	0.000170678	0.0010091	GREM1/COL1A1/MMP2/SFRP1	4
BP	GO:1903961	positive regulation of anion transmembrane transport	0.000170678	0.0010091	ITGB1/PSEN1/ARL6IP1/CFTR	4
CC	GO:0032153	cell division site	0.000185138	0.00103369	ECT2/ANLN/RALA/ITGB1/RACGAP1/CIT/MYLK/MYH9	8
BP	GO:0031345	negative regulation of cell projection organization	0.000175531	0.00103649	SEMA7A/ITGA3/EFNB2/SPOCK1/WNT5A/PSEN1/DPYSL3/DKK1/FLNA/ID1/SRGAP2C/EFNA1/THY1/SPP1	14
BP	GO:0043491	protein kinase B signaling	0.000176147	0.00103883	MST1R/NOX4/MET/ITGB1/IGFBP5/EPHA2/IL18/NTRK2/EGF/TXN/GATA4/TGFBR1/LOX/CCL2/THBS1	15
BP	GO:0006959	humoral immune response	0.000178536	0.0010516	CD55/GAPDH/CXCL5/CLU/LYZ/HLA-A/GPI/TNFRSF21/ALOX5/RARRES2/HLA-DQB1/CXCL10/CXCL14/C1S/C1R/PRSS2/CXCL8/HLA-DRB1/CCL2	19
BP	GO:0001910	regulation of leukocyte mediated cytotoxicity	0.000180958	0.00106454	CEACAM1/TAP2/HLA-B/HLA-A/AZGP1/HLA-DRA/HLA-DRB1/NCKAP1L/IL7R	9
BP	GO:0022412	cellular process involved in reproduction in multicellular organism	0.000183041	0.0010754	EDNRA/ITGB1/ACVR1/BCL2L1/TOP2A/INHBA/CTNNB1/ASPM/CCNB2/NDC80/PRDM1/TRIP13/BRCA2/BRIP1/PRDX4/ANGPT2/LGR5/TNFAIP6/TGFBR1/SERPINA5/EREG/CFTR/SFRP1	23
BP	GO:0048013	ephrin receptor signaling pathway	0.00018326	0.0010754	EFNA5/EFNB2/EPHA2/PAK1/MMP9/EFNA1/MMP2	7
BP	GO:0002260	lymphocyte homeostasis	0.00018628	0.00108771	CCNB2/SKIL/FAS/CD74/HIF1A/TNFAIP3/NCKAP1L/IL7R	8
BP	GO:0050922	negative regulation of chemotaxis	0.00018628	0.00108771	SEMA7A/WNT5A/GREM1/ANGPT2/TNFAIP6/ROBO1/CCL2/THBS1	8
BP	GO:0150116	regulation of cell-substrate junction organization	0.00018628	0.00108771	EFNA5/MMP14/GREM1/CORO1C/THY1/SDC4/SFRP1/THBS1	8
BP	GO:2000401	regulation of lymphocyte migration	0.00018628	0.00108771	WNT5A/ECM1/CXCL12/CCL20/MSN/CXCL10/ITGB3/CCL2	8
CC	GO:0030135	coated vesicle	0.000200288	0.00110296	CEMIP/WNT5A/HLA-C/HLA-B/HLA-A/KDELR3/EGF/HLA-DRA/HLA-DQB1/AREG/TFRC/CD74/HLA-DQA1/EREG/HLA-DPA1/CFTR/HLA-DRB1/IL7R	18
BP	GO:0001759	organ induction	0.00019076	0.00110702	WNT5A/CTNNB1/DKK1/WNT2/ROBO1	5
BP	GO:0003181	atrioventricular valve morphogenesis	0.00019076	0.00110702	ACVR1/BMPR2/EFNA1/GATA4/TGFB2	5
BP	GO:0035988	chondrocyte proliferation	0.00019076	0.00110702	LEF1/MMP14/COMP/BMPR2/DDR2	5
BP	GO:0090103	cochlea morphogenesis	0.00019076	0.00110702	CTHRC1/WNT5A/HPN/ZEB1/PTK7	5
BP	GO:1903902	positive regulation of viral life cycle	0.00019076	0.00110702	TMPRSS4/LGALS1/KPNA2/CD74/HLA-DRB1	5
BP	GO:0048706	embryonic skeletal system development	0.000191357	0.00110912	COL11A1/SULF1/RUNX2/MMP14/EDNRA/WNT5A/CTNNB1/COL1A1/ZEB1/PRRX1/TGFBR1	11
CC	GO:0044853	plasma membrane raft	0.000204734	0.0011122	SLC2A1/EFNA5/F2R/EZR/CTNNB1/BMPR2/CDH2/CORO1C/TFPI/PTGS2	10
BP	GO:0010821	regulation of mitochondrion organization	0.000194952	0.00112857	RALA/CTTN/BCL2L1/CLU/PPARG/MMP9/PLAUR/BNIP3/TFRC/TNFSF10/HIF1A/DCN	12
MF	GO:0019207	kinase regulator activity	9.01702e-05	0.00114646	EFNA5/SFN/ERBB4/TPX2/CAMK2N1/GREM1/CCNB1/CIT/CCNB2/BMPR2/CCNA2/EGF/AREG/CKS2/CXCL10/EREG/NCKAP1L	17
MF	GO:0005536	glucose binding	9.17165e-05	0.00114646	HK2/HK1/PYGL/SLC2A3	4
CC	GO:0005902	microvillus	0.00021576	0.00115647	SLC6A6/CEACAM1/EZR/CTNNB1/ITGAV/PDPN/MSN/CA9/ITGB3	9
MF	GO:0030295	protein kinase activator activity	9.50923e-05	0.00116704	EFNA5/ERBB4/TPX2/GREM1/CCNB1/BMPR2/EGF/AREG/CKS2/EREG/NCKAP1L	11
BP	GO:0090263	positive regulation of canonical Wnt signaling pathway	0.000202388	0.00116886	HHEX/ASPM/COL1A1/PTK7/EGF/LGR5/SFRP2/GPC3/SFRP4/SFRP1	10
BP	GO:0006869	lipid transport	0.000202407	0.00116886	SLC2A1/ANXA2/CEACAM1/INHBA/ITGAV/CLU/VLDLR/PPARG/EGF/ANXA1/LRP1/CRABP2/APOH/ABCA1/SERPINA5/IL1A/ITGB3/MSR1/CFTR/SPP1/THBS1/PTGS2/AQP9	23
BP	GO:0002294	CD4-positive, alpha-beta T cell differentiation involved in immune response	0.000206134	0.00118602	LEF1/TNFSF4/CD80/IL18/PTGER4/ANXA1/HLA-DRA/HLA-DRB1	8
BP	GO:0014823	response to activity	0.000206134	0.00118602	ITGA2/ZEB1/COL4A2/CDK1/ANGPT2/MMP2/ITGB3/HIF1A	8
BP	GO:0043627	response to estrogen	0.000206134	0.00118602	KRT19/MMP14/PDGFRB/TNFRSF11B/IGFBP2/MMP2/MME/SFRP1	8
BP	GO:0060071	Wnt signaling pathway, planar cell polarity pathway	0.000207001	0.00118956	CTHRC1/WNT5A/DKK1/PTK7/SFRP2/GPC3/SFRP1	7
BP	GO:0046631	alpha-beta T cell activation	0.000211221	0.00121234	LEF1/CD55/TNFSF4/RUNX1/CD80/PRDM1/IL18/HLA-A/PTGER4/ANXA1/HLA-DRA/HLA-DRB1/NCKAP1L	13
BP	GO:0002443	leukocyte mediated immunity	0.000213006	0.0012211	CD55/TNFSF4/CEACAM1/AHR/CLU/TAP2/HLA-B/IL18/HLA-A/BST2/TUBB/AZGP1/HLA-DRA/HLA-DQB1/TFRC/C1S/CD74/C1R/HLA-DQA1/HLA-DPA1/HLA-DRB1/NCKAP1L/IL7R/NR4A3	24
BP	GO:0048678	response to axon injury	0.000215334	0.00123145	DPYSL3/FLNA/BNIP3/DHFR/CDK1/THY1/MMP2/SPP1/TNC	9
BP	GO:0048864	stem cell development	0.000215334	0.00123145	FN1/SEMA7A/EDNRA/ERBB4/ACVR1/CDH2/CORO1C/KITLG/HIF1A	9
BP	GO:0071897	DNA biosynthetic process	0.000217046	0.00123974	NOX4/CENPF/GREM1/CTNNB1/NEK2/CHEK1/DTL/BMPR2/MYC/PDGFRB/TYMS/LOX/ANKRD1/CYP1B1	14
BP	GO:0042092	type 2 immune response	0.000217457	0.00124058	TNFSF4/ECM1/IL18/ANXA1/IDO1/CD74	6
BP	GO:0010469	regulation of signaling receptor activity	0.000223483	0.00127342	PLAU/LY6E/ITGB1/GREM1/PSEN1/DKK1/PPARG/EGF/AREG/HIF1A/EREG/CCL2/SERPINE1	13
BP	GO:0002287	alpha-beta T cell activation involved in immune response	0.000227691	0.00129427	LEF1/TNFSF4/CD80/IL18/PTGER4/ANXA1/HLA-DRA/HLA-DRB1	8
BP	GO:0002293	alpha-beta T cell differentiation involved in immune response	0.000227691	0.00129427	LEF1/TNFSF4/CD80/IL18/PTGER4/ANXA1/HLA-DRA/HLA-DRB1	8
BP	GO:0009615	response to virus	0.00023263	0.0013161	MST1R/PML/TNFSF4/BCL2L1/CXCL12/MMP12/ACTA2/EIF2AK2/CLU/STAT1/ENO1/BST2/BNIP3/ITGB8/NMI/BIRC3/IFITM1/HTRA1/IFI16/CXCL10/HIF1A/TNFAIP3	22
BP	GO:0030857	negative regulation of epithelial cell differentiation	0.000233161	0.0013161	CTNNB1/STAT1/ID1/MMP9/ZEB1/IL1A/TP63	7
BP	GO:0001911	negative regulation of leukocyte mediated cytotoxicity	0.000233954	0.0013161	CEACAM1/HLA-B/HLA-A/NCKAP1L/IL7R	5
BP	GO:0072273	metanephric nephron morphogenesis	0.000233954	0.0013161	GREM1/CTNNB1/STAT1/PDGFRB/LIF	5
BP	GO:2000209	regulation of anoikis	0.000233954	0.0013161	CEACAM5/ITGB1/PDK4/NTRK2/ITGA5	5
BP	GO:0055006	cardiac cell development	0.000234458	0.0013161	PROX1/INHBA/FHL2/PDCD4/SGCB/PDGFRB/CDK1/GATA4/TGFBR3	9
BP	GO:0070098	chemokine-mediated signaling pathway	0.000234458	0.0013161	CXCL12/CXCL5/CCL20/ROBO1/CXCL10/CCL18/HIF1A/CXCL8/CCL2	9
BP	GO:0046598	positive regulation of viral entry into host cell	0.000234599	0.0013161	TMPRSS4/LGALS1/CD74/HLA-DRB1	4
BP	GO:0051255	spindle midzone assembly	0.000234599	0.0013161	RACGAP1/KIF23/PRC1/KIF4A	4
BP	GO:0061043	regulation of vascular wound healing	0.000234599	0.0013161	XBP1/ALOX5/TNFAIP3/SERPINE1	4
BP	GO:0075294	positive regulation by symbiont of entry into host	0.000234599	0.0013161	TMPRSS4/LGALS1/CD74/HLA-DRB1	4
BP	GO:0007173	epidermal growth factor receptor signaling pathway	0.000235298	0.00131845	AGR2/RALA/ERBB4/CEACAM1/PSEN1/MMP9/PLAUR/EGF/AREG/EREG	10
MF	GO:0005154	epidermal growth factor receptor binding	0.000113192	0.00136437	AGR2/ERBB4/EGF/AREG/ITGA5/EREG	6
CC	GO:0030136	clathrin-coated vesicle	0.00026486	0.00140097	CEMIP/WNT5A/EGF/HLA-DRA/HLA-DQB1/AREG/TFRC/CD74/HLA-DQA1/EREG/HLA-DPA1/CFTR/HLA-DRB1/IL7R	14
BP	GO:0032570	response to progesterone	0.000252034	0.00141055	GPI/TYMS/TGFB2/FOSB/CYP1B1/THBS1	6
BP	GO:0031532	actin cytoskeleton reorganization	0.000253365	0.00141632	ANTXR1/RALA/CTTN/EZR/ATP2C1/FLNA/PAK1/PTK7/MYH9/ANXA1	10
BP	GO:0045936	negative regulation of phosphate metabolic process	0.000254801	0.00142024	LGALS3/IGFBP3/SFN/CEACAM1/INHBA/CAMK2N1/GREM1/PSEN1/HHEX/PMEPA1/DKK1/PDCD4/PPARG/CORO1C/SFRP2/THY1/LRP1/DDR2/TGFB2/PAX6/TNFAIP3/NCKAP1L/SFRP1	23
BP	GO:0001942	hair follicle development	0.000254969	0.00142024	FERMT1/WNT5A/INHBA/IGFBP5/CTNNB1/DKK1/LGR5/TGFB2/TP63	9
BP	GO:0042475	odontogenesis of dentin-containing tooth	0.000254969	0.00142024	LEF1/RUNX2/CTNNB1/TNFRSF11B/HTRA1/TP63/CFTR/ADM/SERPINE1	9
BP	GO:0051651	maintenance of location in cell	0.000260485	0.001447	CEMIP/HK2/PML/F2R/HK1/MCOLN3/PSEN1/ASPM/FLNA/KDELR3/GPSM2/TXN/THY1/CXCL10/ITGB3	15
BP	GO:0043616	keratinocyte proliferation	0.00026192	0.001447	FERMT1/SFN/EFNB2/ZEB1/AREG/TP63/EREG	7
BP	GO:0071320	cellular response to cAMP	0.00026192	0.001447	EZR/IGFBP5/AHR/AQP1/CFTR/CYP1B1/AQP9	7
BP	GO:1903202	negative regulation of oxidative stress-induced cell death	0.00026192	0.001447	MET/CTNNB1/TXN/GATA4/DDR2/HIF1A/NR4A3	7
BP	GO:1904645	response to amyloid-beta	0.00026192	0.001447	PSEN1/MMP12/MMP9/MMP3/MMP13/MMP2/LRP1	7
BP	GO:2000179	positive regulation of neural precursor cell proliferation	0.00026192	0.001447	ITGB1/PROX1/CTNNB1/ASPM/EGF/PAX6/HIF1A	7
BP	GO:2000648	positive regulation of stem cell proliferation	0.00026192	0.001447	RUNX2/WNT5A/CTNNB1/PRRX1/KITLG/TP63/EPCAM	7
BP	GO:0010563	negative regulation of phosphorus metabolic process	0.000263187	0.0014523	LGALS3/IGFBP3/SFN/CEACAM1/INHBA/CAMK2N1/GREM1/PSEN1/HHEX/PMEPA1/DKK1/PDCD4/PPARG/CORO1C/SFRP2/THY1/LRP1/DDR2/TGFB2/PAX6/TNFAIP3/NCKAP1L/SFRP1	23
BP	GO:0048259	regulation of receptor-mediated endocytosis	0.00027258	0.00150237	ANXA2/EFNB2/GREM1/ITGAV/CLU/DKK1/EGF/ITGB3/SFRP4/SERPINE1	10
BP	GO:0072678	T cell migration	0.000276358	0.00151788	WNT5A/ECM1/CXCL12/CCL20/MSN/CXCL10/ITGB3/CCL2	8
BP	GO:0150076	neuroinflammatory response	0.000276358	0.00151788	ITGB1/PSEN1/CLU/IL18/MMP9/MMP3/LRP1/PTGS2	8
BP	GO:1904888	cranial skeletal system development	0.000276358	0.00151788	RUNX2/MMP14/EDNRA/CTNNB1/PRRX1/TGFBR1/TGFB2/TP63	8
CC	GO:0030176	integral component of endoplasmic reticulum membrane	0.000296228	0.00154654	ARL6IP1/TAP1/TAP2/HLA-C/HLA-B/HLA-A/HLA-DRA/HLA-DQB1/CD74/HLA-DQA1/HLA-DPA1/HLA-DRB1	12
BP	GO:0006929	substrate-dependent cell migration	0.000284198	0.00155191	ITGA2/FN1/ITGA11/CTTN/ROBO1	5
BP	GO:0010259	multicellular organism aging	0.000284198	0.00155191	EDNRA/INHBA/COMP/SLC1A2/TP63	5
BP	GO:0033598	mammary gland epithelial cell proliferation	0.000284198	0.00155191	WNT5A/EPHA2/BRCA2/ROBO1/AREG	5
BP	GO:0035994	response to muscle stretch	0.000284198	0.00155191	CTNNB1/CDH2/GPI/DDR2/ANKRD1	5
BP	GO:0062009	secondary palate development	0.000284198	0.00155191	LEF1/WNT5A/ITGB8/TGFBR3/TGFB2	5
BP	GO:0001909	leukocyte mediated cytotoxicity	0.000285719	0.00155841	CEACAM1/TAP2/HLA-B/IL18/HLA-A/TUBB/AZGP1/HLA-DRA/HLA-DRB1/NCKAP1L/IL7R	11
CC	GO:0030017	sarcomere	0.000305969	0.00157692	SLC2A1/KRT19/TPM4/PSEN1/CTNNB1/FHL2/TPM2/FLNA/ENO1/PAK1/CORO1C/DST/MMP2/ANKRD1	14
BP	GO:0032965	regulation of collagen biosynthetic process	0.00029079	0.00158058	ITGA2/F2R/RUNX1/INHBA/PDGFRB/DDR2	6
BP	GO:0035886	vascular associated smooth muscle cell differentiation	0.00029079	0.00158058	EDNRA/COMP/PDCD4/SGCB/CTH/ADM	6
BP	GO:1902692	regulation of neuroblast proliferation	0.00029079	0.00158058	ITGB1/PROX1/CTNNB1/ASPM/PAX6/HIF1A	6
MF	GO:0098631	cell adhesion mediator activity	0.000133735	0.00158371	ITGA2/ITGA11/ANXA2/ITGB1/ANXA1/DSC2/KRT18/EPCAM	8
MF	GO:0008237	metallopeptidase activity	0.000136726	0.00159121	MMP14/MMP11/MMP12/ANPEP/MMP9/BMP1/MMP3/MMP13/MMP2/MMP1/ADAM12/MMP7/PRSS2/MME	14
BP	GO:0001836	release of cytochrome c from mitochondria	0.000293465	0.00159146	SFN/BCL2L1/CLU/MMP9/PLAUR/BNIP3/TNFSF10	7
BP	GO:0002707	negative regulation of lymphocyte mediated immunity	0.000293465	0.00159146	CD55/CEACAM1/AHR/HLA-B/HLA-A/NCKAP1L/IL7R	7
BP	GO:1901888	regulation of cell junction assembly	0.000295076	0.00159836	EFNA5/MMP14/THBS2/WNT5A/GREM1/EPHA2/DKK1/SRPX2/NTRK2/CORO1C/THY1/SDC4/SFRP1/THBS1	14
MF	GO:0030021	extracellular matrix structural constituent conferring compression resistance	0.000141116	0.00161446	VCAN/BGN/ASPN/LUM/DCN	5
BP	GO:0019318	hexose metabolic process	0.000300077	0.00162358	IGFBP3/PKM/HK2/ENO2/PGK1/GALE/HK1/GAPDH/PFKP/PDK4/PGM2/SLC25A12/ENO1/ALDOC/GPI	15
BP	GO:0090307	mitotic spindle assembly	0.0003037	0.0016413	TPX2/RACGAP1/KIF23/PRC1/NEK2/FLNA/KIF11/KIF4A	8
BP	GO:2001235	positive regulation of apoptotic signaling pathway	0.000304738	0.00164503	PML/INHBA/SKIL/MYC/FAS/TGFBR1/TNFSF10/TP63/SFRP1/THBS1/VNN1	11
BP	GO:0000212	meiotic spindle organization	0.000314088	0.00167948	ASPM/CCNB2/NDC80/MYH9	4
BP	GO:0048820	hair follicle maturation	0.000314088	0.00167948	FERMT1/WNT5A/CTNNB1/TGFB2	4
BP	GO:0060026	convergent extension	0.000314088	0.00167948	WNT5A/PTK7/SFRP2/SFRP1	4
BP	GO:0060413	atrial septum morphogenesis	0.000314088	0.00167948	ACVR1/BMPR2/GATA4/TGFB2	4
BP	GO:0072283	metanephric renal vesicle morphogenesis	0.000314088	0.00167948	GREM1/CTNNB1/STAT1/LIF	4
BP	GO:0090280	positive regulation of calcium ion import	0.000314088	0.00167948	LGALS3/CXCL12/PDGFRB/CCL2	4
BP	GO:2000052	positive regulation of non-canonical Wnt signaling pathway	0.000314088	0.00167948	WNT5A/DKK1/GPC3/SFRP1	4
BP	GO:2000345	regulation of hepatocyte proliferation	0.000314088	0.00167948	CEACAM1/HPN/XBP1/TNFAIP3	4
BP	GO:0002824	positive regulation of adaptive immune response based on somatic recombination of immune receptors built from immunoglobulin superfamily domains	0.00031468	0.00167948	CD55/TNFSF4/TAP2/HLA-B/IL18/HLA-A/AZGP1/HLA-DRA/TFRC/HLA-DRB1	10
BP	GO:0044344	cellular response to fibroblast growth factor stimulus	0.00031468	0.00167948	SULF1/RUNX2/WNT5A/CTNNB1/COL1A1/SHCBP1/CXCL8/CCL2/SFRP1/THBS1	10
MF	GO:0019209	kinase activator activity	0.000150228	0.00169007	EFNA5/ERBB4/TPX2/GREM1/CCNB1/BMPR2/EGF/AREG/CKS2/EREG/NCKAP1L	11
BP	GO:0008347	glial cell migration	0.000327988	0.00174262	MMP14/CTNNB1/COL3A1/SRGAP2C/LAMB1/TGFB2/CCL2	7
BP	GO:0010332	response to gamma radiation	0.000327988	0.00174262	PML/FANCD2/BCL2L1/BRCA2/MYC/CXCL10/IL1A	7
BP	GO:0070231	T cell apoptotic process	0.000327988	0.00174262	LGALS3/WNT5A/EFNA1/FAS/IDO1/HIF1A/IL7R	7
BP	GO:0090175	regulation of establishment of planar polarity	0.000327988	0.00174262	CTHRC1/WNT5A/DKK1/PTK7/SFRP2/GPC3/SFRP1	7
BP	GO:0031669	cellular response to nutrient levels	0.000329261	0.00174742	SLC2A1/POSTN/PDK4/NUAK1/EIF2AK2/COL1A1/BMPR2/BRIP1/CTSK/XBP1/FAS/IFI16/CD68/DSC2/SFRP1	15
BP	GO:0045124	regulation of bone resorption	0.00033407	0.00176697	PDK4/TNFRSF11B/TFRC/ITGB3/TNFAIP3/SPP1	6
BP	GO:0070232	regulation of T cell apoptotic process	0.00033407	0.00176697	LGALS3/WNT5A/EFNA1/IDO1/HIF1A/IL7R	6
BP	GO:0072210	metanephric nephron development	0.00033407	0.00176697	GREM1/CTNNB1/STAT1/AQP1/PDGFRB/LIF	6
BP	GO:0001938	positive regulation of endothelial cell proliferation	0.000337685	0.0017841	WNT5A/PROX1/ECM1/CXCL12/BMPR2/EGF/WNT2/TGFBR1/ITGB3/HIF1A	10
BP	GO:0003171	atrioventricular valve development	0.000342218	0.00180401	ACVR1/BMPR2/EFNA1/GATA4/TGFB2	5
BP	GO:0003401	axis elongation	0.000342218	0.00180401	WNT5A/PTK7/SFRP2/AREG/SFRP1	5
BP	GO:0098773	skin epidermis development	0.000352484	0.00185605	FERMT1/WNT5A/INHBA/IGFBP5/CTNNB1/DKK1/LGR5/TGFB2/TP63	9
BP	GO:0051147	regulation of muscle cell differentiation	0.000354085	0.0018624	CEACAM5/MMP14/EFNB2/PROX1/DKK1/PDCD4/BMPR2/ZEB1/XBP1/CTH/LAMB1/EREG	12
BP	GO:0002832	negative regulation of response to biotic stimulus	0.000362076	0.00190231	CEACAM1/MMP12/AHR/HLA-B/HLA-A/PPARG/NMI/HTRA1/IFI16/TNFAIP3	10
BP	GO:0001541	ovarian follicle development	0.000365693	0.00191492	MMP14/BCL2L1/INHBA/TNFAIP6/MMP2/KITLG/EREG	7
BP	GO:0048008	platelet-derived growth factor receptor signaling pathway	0.000365693	0.00191492	PLAT/PDGFC/PDGFRB/LRP1/LOX/ITGB3/NR4A3	7
BP	GO:0061005	cell differentiation involved in kidney development	0.000365693	0.00191492	EDNRA/GREM1/CTNNB1/ACTA2/STAT1/MMP9/LIF	7
BP	GO:0009743	response to carbohydrate	0.000377604	0.0019751	ITGA2/NOX4/RUNX2/EFNA5/RASAL2/KLF7/XBP1/ANGPT2/GATA4/IL1A/HIF1A/CFTR/HLA-DRB1/THBS1/PTGS2	15
BP	GO:0007015	actin filament organization	0.000396552	0.00207191	TPM4/CAPG/MET/PRKCI/CTTN/ITGB5/PROX1/PLS3/EZR/CXCL12/CIT/CALD1/DPYSL3/TPM2/FLNA/PAK1/ID1/PTGER4/CORO1C/TGFBR1/SDC4/NCKAP1L/SFRP1	23
BP	GO:0045824	negative regulation of innate immune response	0.000399255	0.00208372	CEACAM1/MMP12/HLA-B/HLA-A/PPARG/NMI/IFI16/TNFAIP3	8
BP	GO:0006909	phagocytosis	0.0004005	0.00208791	ITGA2/MST1R/MET/ITGB1/TGM2/ITGAV/PAK1/CORO1C/MYH9/ANXA1/MARCO/LRP1/ABCA1/ITGB3/MSR1/NCKAP1L/CCL2/THBS1	18
BP	GO:0002090	regulation of receptor internalization	0.000406789	0.00211369	ANXA2/EFNB2/GREM1/DKK1/EGF/ITGB3/SFRP4	7
BP	GO:0051785	positive regulation of nuclear division	0.000406789	0.00211369	WNT5A/DLGAP5/RAD51AP1/PDGFRB/EGF/IL1A/EREG	7
BP	GO:0061098	positive regulation of protein tyrosine kinase activity	0.000406789	0.00211369	NOX4/ERBB4/GREM1/EGF/EFNA1/AREG/EREG	7
MF	GO:0005024	transforming growth factor beta receptor activity	0.000191327	0.00211714	ACVR1/BMPR2/TGFBR1/TGFBR3	4
BP	GO:0002052	positive regulation of neuroblast proliferation	0.000408771	0.00211828	ITGB1/CTNNB1/ASPM/PAX6/HIF1A	5
BP	GO:0031342	negative regulation of cell killing	0.000408771	0.00211828	CEACAM1/HLA-B/HLA-A/NCKAP1L/IL7R	5
BP	GO:0010715	regulation of extracellular matrix disassembly	0.000411172	0.00211828	FAP/PDPN/LRP1/DDR2	4
BP	GO:0023035	CD40 signaling pathway	0.000411172	0.00211828	FANCD2/ITGB1/ITGA5/TNFAIP3	4
BP	GO:0070365	hepatocyte differentiation	0.000411172	0.00211828	ITGA2/PROX1/E2F7/ANXA1	4
BP	GO:2000095	regulation of Wnt signaling pathway, planar cell polarity pathway	0.000411172	0.00211828	DKK1/SFRP2/GPC3/SFRP1	4
BP	GO:2000696	regulation of epithelial cell differentiation involved in kidney development	0.000411172	0.00211828	CTNNB1/STAT1/MMP9/LIF	4
BP	GO:0002690	positive regulation of leukocyte chemotaxis	0.000411713	0.00211828	WNT5A/CXCL12/RARRES2/CXCL10/CD74/CXCL8/NCKAP1L/THBS1/SERPINE1	9
BP	GO:2001251	negative regulation of chromosome organization	0.000411713	0.00211828	CENPF/TOP2A/CCNB1/RAD21/BUB1/NDC80/TRIP13/NUF2/BUB1B	9
BP	GO:0007266	Rho protein signal transduction	0.000416606	0.00214112	ITGA3/MET/F2R/ITGB1/RACGAP1/COL1A2/COL3A1/PDGFRB/PDPN/ROBO1/ABCA1	11
BP	GO:0000910	cytokinesis	0.000425217	0.00218299	ECT2/ANLN/BCL2L1/RACGAP1/KIF23/CIT/PRC1/E2F7/BRCA2/CDC6/KIF14/KIF4A/MYH9	13
CC	GO:0098687	chromosomal region	0.000431496	0.00219571	PML/CENPF/TOP2A/CCNB1/PSEN1/RAD21/SMC4/XPO1/BUB1/NEK2/MCM6/NDC80/CHEK1/RAD51AP1/MCM4/BRCA2/SMC6/NUF2/CDK1/BUB1B	20
BP	GO:0043270	positive regulation of ion transport	0.000429531	0.00220274	LGALS3/CEMIP/EDNRA/F2R/ITGB1/PSEN1/ARL6IP1/CXCL12/FLNA/PDGFRB/MYLK/THY1/CXCL10/IL1A/GLRX/CFTR/CCL2	17
BP	GO:0008608	attachment of spindle microtubules to kinetochore	0.000435659	0.00222933	ECT2/RACGAP1/CCNB1/NEK2/NDC80/NUF2	6
BP	GO:0045622	regulation of T-helper cell differentiation	0.000435659	0.00222933	TNFSF4/CD80/IL18/ANXA1/HLA-DRA/HLA-DRB1	6
BP	GO:0070555	response to interleukin-1	0.000442676	0.00226278	PRKCI/CCL20/ANXA1/GBP2/MMP2/CCL18/HIF1A/ANKRD1/CXCL8/CCL2/SFRP1	11
BP	GO:0002708	positive regulation of lymphocyte mediated immunity	0.000444221	0.00226598	CD55/TNFSF4/TAP2/HLA-B/IL18/HLA-A/AZGP1/HLA-DRA/TFRC/HLA-DRB1	10
BP	GO:0060349	bone morphogenesis	0.000444263	0.00226598	RUNX2/MMP14/COL1A1/COMP/COL3A1/BMPR2/SERPINH1/MMP13/SFRP4	9
CC	GO:0005901	caveola	0.000455146	0.00226767	SLC2A1/EFNA5/F2R/CTNNB1/BMPR2/CORO1C/TFPI/PTGS2	8
CC	GO:0031227	intrinsic component of endoplasmic reticulum membrane	0.000456919	0.00226767	ARL6IP1/TAP1/TAP2/HLA-C/HLA-B/HLA-A/HLA-DRA/HLA-DQB1/CD74/HLA-DQA1/HLA-DPA1/HLA-DRB1	12
CC	GO:0098858	actin-based cell projection	0.000463683	0.00227318	ANTXR1/ITGA3/SLC6A6/CEACAM1/ITGB1/EZR/CTNNB1/ITGAV/ACTA2/PDPN/MSN/CA9/KITLG/ITGB3	14
BP	GO:0010721	negative regulation of cell development	0.000447434	0.00227723	EFNA5/SEMA7A/WNT5A/PROX1/PSEN1/CTNNB1/ID1/CORO1C/FBN1/THY1/IL1A/PAX6/SPP1	13
BP	GO:0030308	negative regulation of cell growth	0.000447434	0.00227723	SEMA7A/PML/DCBLD2/WNT5A/INHBA/GREM1/ENO1/BMPR2/BST2/SFRP2/TGFB2/SPP1/SFRP1	13
MF	GO:0001664	G protein-coupled receptor binding	0.000209378	0.00227952	CTHRC1/RALA/WNT5A/CXCL12/CXCL5/CCL20/STAT1/APLP1/FLNA/WNT2/MARCO/CXCL10/CCL18/CXCL14/CXCL8/ADM/CCL2/SFRP1	18
BP	GO:0022029	telencephalon cell migration	0.000451493	0.00229541	PSEN1/CXCL12/CTNNB1/COL3A1/SRGAP2C/ROBO1/LAMB1	7
BP	GO:0010977	negative regulation of neuron projection development	0.000470099	0.00238743	SEMA7A/EFNB2/SPOCK1/WNT5A/PSEN1/DPYSL3/DKK1/FLNA/EFNA1/THY1/SPP1	11
BP	GO:0051896	regulation of protein kinase B signaling	0.000470628	0.00238755	MST1R/NOX4/MET/ITGB1/IGFBP5/EPHA2/IL18/NTRK2/EGF/TXN/GATA4/TGFBR1/THBS1	13
CC	GO:0016363	nuclear matrix	0.000493009	0.00238783	ANXA2/PML/CENPF/RAD21/SPARC/KIF4A/ALOX5/ENC1/LMNB1/KRT8	10
BP	GO:0002821	positive regulation of adaptive immune response	0.000474822	0.00240108	CD55/TNFSF4/TAP2/HLA-B/IL18/HLA-A/AZGP1/HLA-DRA/TFRC/HLA-DRB1	10
BP	GO:0051897	positive regulation of protein kinase B signaling	0.000474822	0.00240108	MST1R/NOX4/MET/ITGB1/IGFBP5/IL18/EGF/TXN/TGFBR1/THBS1	10
BP	GO:0071774	response to fibroblast growth factor	0.000474822	0.00240108	SULF1/RUNX2/WNT5A/CTNNB1/COL1A1/SHCBP1/CXCL8/CCL2/SFRP1/THBS1	10
BP	GO:0002292	T cell differentiation involved in immune response	0.000475565	0.00240226	LEF1/TNFSF4/CD80/IL18/PTGER4/ANXA1/HLA-DRA/HLA-DRB1	8
BP	GO:0015813	L-glutamate transmembrane transport	0.000484638	0.00244026	ITGB1/PSEN1/ARL6IP1/SLC25A12/SLC1A2	5
BP	GO:0051938	L-glutamate import	0.000484638	0.00244026	ITGB1/PSEN1/ARL6IP1/SLC25A12/SLC1A2	5
BP	GO:0060037	pharyngeal system development	0.000484638	0.00244026	EDNRA/ACVR1/BMPR2/TGFBR1/TGFB2	5
CC	GO:0016328	lateral plasma membrane	0.000514055	0.00246012	SLC16A3/CEACAM1/CTNNB1/GPSM2/CORO1C/ANXA1/EPCAM	7
BP	GO:0042771	intrinsic apoptotic signaling pathway in response to DNA damage by p53 class mediator	0.000494732	0.00248843	PML/BRCA2/IFI16/MUC1/CD74/TP63	6
BP	GO:2000278	regulation of DNA biosynthetic process	0.000507152	0.00254818	NOX4/GREM1/CTNNB1/NEK2/CHEK1/BMPR2/MYC/PDGFRB/ANKRD1/CYP1B1	10
BP	GO:0002703	regulation of leukocyte mediated immunity	0.000514653	0.00258301	CD55/TNFSF4/CEACAM1/AHR/TAP2/HLA-B/IL18/HLA-A/BST2/AZGP1/HLA-DRA/TFRC/HLA-DRB1/NCKAP1L/IL7R	15
BP	GO:0030316	osteoclast differentiation	0.000515726	0.00258301	ANXA2/EPHA2/CTNNB1/FBN1/TNFRSF11B/TNFAIP6/GPC3/TFRC/SFRP1	9
BP	GO:1901992	positive regulation of mitotic cell cycle phase transition	0.000515726	0.00258301	CCNB1/DLGAP5/STIL/CDC6/DTL/UBE2C/CDK1/ANXA1/DDR2	9
BP	GO:0072028	nephron morphogenesis	0.000517926	0.00259128	ERBB4/GREM1/CTNNB1/STAT1/MYC/PDGFRB/LIF/GPC3	8
BP	GO:0009416	response to light stimulus	0.000519828	0.00259804	PML/ITGB1/BHLHE40/CRIP1/CHEK1/BRCA2/DTL/MYC/SLC1A2/MMP9/AQP1/TIMP1/MMP3/MMP2/MMP1/HIF1A/MME/PTGS2	18
BP	GO:0033623	regulation of integrin activation	0.00052792	0.00263012	FERMT1/KIF14/PTGER4/CDH17	4
BP	GO:0036342	post-anal tail morphogenesis	0.00052792	0.00263012	WNT5A/EPHA2/SFRP2/TP63	4
BP	GO:0098712	L-glutamate import across plasma membrane	0.00052792	0.00263012	ITGB1/PSEN1/ARL6IP1/SLC1A2	4
BP	GO:1901989	positive regulation of cell cycle phase transition	0.000541286	0.00269387	CCNB1/DLGAP5/FAM83D/STIL/CDC6/DTL/UBE2C/CDK1/ANXA1/DDR2	10
BP	GO:0031334	positive regulation of protein-containing complex assembly	0.00054642	0.00271656	LGALS3/FERMT1/MET/CTTN/CLU/PAK1/MMP3/MSN/MMP1/ABCA1/TFRC/CDH17/NCKAP1L	13
BP	GO:0060038	cardiac muscle cell proliferation	0.000552635	0.00274167	ERBB4/RUNX1/CDK1/WNT2/TGFBR1/TGFBR3/TGFB2	7
BP	GO:0070228	regulation of lymphocyte apoptotic process	0.000552635	0.00274167	LGALS3/WNT5A/EFNA1/IDO1/CD74/HIF1A/IL7R	7
BP	GO:0045132	meiotic chromosome segregation	0.000554842	0.00274973	FANCD2/TOP2A/RAD21/SMC4/BUB1/TRIP13/NUF2/BRIP1/BUB1B	9
BP	GO:0014065	phosphatidylinositol 3-kinase signaling	0.00056104	0.00277753	FN1/ERBB4/F2R/CEACAM1/PDGFC/IL18/NTRK2/PDGFRB/EGF/TGFB2/DCN	11
BP	GO:0048872	homeostasis of number of cells	0.000563589	0.00278723	F2R/INHBA/CCNB2/STAT1/SKIL/CDH2/GPI/ANXA1/FAS/KITLG/FSTL1/TGFBR3/CD74/HIF1A/TNFAIP3/NCKAP1L/IL7R	17
MF	GO:0005161	platelet-derived growth factor receptor binding	0.000262835	0.00281609	PDGFC/PDGFRB/ITGA5/ITGB3	4
MF	GO:0050431	transforming growth factor beta binding	0.000268428	0.00283108	ACVR1/ITGAV/TGFBR1/TGFBR3/THBS1	5
BP	GO:0043523	regulation of neuron apoptotic process	0.000575442	0.00283989	EGLN3/PRKCI/BTG2/F2R/BCL2L1/PSEN1/CTNNB1/KIF14/NTRK2/GPI/TGFB2/HIF1A/CCL2/NR4A2	14
BP	GO:1901215	negative regulation of neuron death	0.000575442	0.00283989	ENO2/PRKCI/BTG2/F2R/BCL2L1/PSEN1/CTNNB1/KIF14/NTRK2/GPI/HIF1A/CCL2/NR4A3/NR4A2	14
MF	GO:0001221	transcription coregulator binding	0.000276564	0.00287201	LEF1/CTNNB1/CIT/AHR/STAT1/ENO1/MYC/PPARG/PAX6/HIF1A	10
BP	GO:0060419	heart growth	0.000596355	0.00294003	ERBB4/RUNX1/PROX1/CDK1/WNT2/GATA4/TGFBR1/TGFBR3/TGFB2	9
BP	GO:0042326	negative regulation of phosphorylation	0.000601494	0.00296226	IGFBP3/SFN/CEACAM1/INHBA/CAMK2N1/GREM1/PSEN1/HHEX/PMEPA1/DKK1/PDCD4/PPARG/CORO1C/SFRP2/THY1/LRP1/DDR2/PAX6/TNFAIP3/SFRP1	20
BP	GO:0010952	positive regulation of peptidase activity	0.000602484	0.00296405	ANTXR1/FN1/EGLN3/PML/F2R/MYC/PPARG/EFNA1/ROBO1/SFRP2/FAS/IFI16/TNFSF10	13
BP	GO:0021885	forebrain cell migration	0.000609546	0.00299566	PSEN1/CXCL12/CTNNB1/COL3A1/SRGAP2C/ROBO1/LAMB1	7
BP	GO:0042471	ear morphogenesis	0.000615275	0.00302068	COL11A1/CTHRC1/EDNRA/WNT5A/PROX1/HPN/ZEB1/PTK7/PRRX1/LRIG1	10
BP	GO:0006816	calcium ion transport	0.000627911	0.00307129	LGALS3/CEMIP/ANXA2/EDNRA/PML/F2R/MCOLN3/PSEN1/CXCL12/CTNNB1/ATP2C1/ITGAV/FLNA/PDGFRB/MYLK/EGF/THY1/CXCL10/ITGB3/GEM/CCL2/PTGS2	22
BP	GO:0021795	cerebral cortex cell migration	0.000631443	0.00307129	PSEN1/CTNNB1/COL3A1/SRGAP2C/ROBO1/LAMB1	6
BP	GO:0032467	positive regulation of cytokinesis	0.000631443	0.00307129	ECT2/RACGAP1/KIF23/CIT/CDC6/KIF14	6
BP	GO:0042088	T-helper 1 type immune response	0.000631443	0.00307129	LEF1/TNFSF4/CD80/IL18/ANXA1/HLA-DRB1	6
BP	GO:0046596	regulation of viral entry into host cell	0.000631443	0.00307129	TMPRSS4/LY6E/LGALS1/IFITM1/CD74/HLA-DRB1	6
BP	GO:0055010	ventricular cardiac muscle tissue morphogenesis	0.000631443	0.00307129	COL11A1/EDNRA/PROX1/TGFBR1/TGFBR3/TGFB2	6
BP	GO:0060443	mammary gland morphogenesis	0.000631443	0.00307129	PML/WNT5A/IGFBP5/EPHA2/AREG/ELF3	6
BP	GO:0085029	extracellular matrix assembly	0.000631443	0.00307129	LAMB3/ANTXR1/COL1A2/COL3A1/LAMB1/LOX	6
BP	GO:1901861	regulation of muscle tissue development	0.000631443	0.00307129	LEF1/CENPF/ACVR1/IGFBP5/CTNNB1/LOX	6
CC	GO:0030863	cortical cytoskeleton	0.000656463	0.00310468	SLC2A1/KRT19/TPM4/ANLN/CTTN/EZR/CALD1/CDH2/MYH9	9
BP	GO:0042472	inner ear morphogenesis	0.000640377	0.00311153	COL11A1/CTHRC1/WNT5A/PROX1/HPN/ZEB1/PTK7/PRRX1/LRIG1	9
BP	GO:0030500	regulation of bone mineralization	0.000663662	0.00320411	ACVR1/ECM1/GREM1/COMP/BMPR2/ALOX5/DDR2/HIF1A	8
BP	GO:0042310	vasoconstriction	0.000663662	0.00320411	EDNRA/F2R/ACTA2/COMP/BMPR2/MMP2/ADM/PTGS2	8
BP	GO:0001946	lymphangiogenesis	0.000666435	0.00320411	PROX1/EPHA2/BMPR2/PDPN	4
BP	GO:0002830	positive regulation of type 2 immune response	0.000666435	0.00320411	TNFSF4/IL18/IDO1/CD74	4
BP	GO:0030903	notochord development	0.000666435	0.00320411	WNT5A/EPHA2/STIL/EFNA1	4
BP	GO:0038128	ERBB2 signaling pathway	0.000666435	0.00320411	ERBB4/EGF/AREG/EREG	4
BP	GO:0046851	negative regulation of bone remodeling	0.000666435	0.00320411	GREM1/TNFRSF11B/TNFAIP3/SFRP1	4
BP	GO:0051988	regulation of attachment of spindle microtubules to kinetochore	0.000666435	0.00320411	ECT2/RACGAP1/CCNB1/NEK2	4
BP	GO:0072077	renal vesicle morphogenesis	0.000666435	0.00320411	GREM1/CTNNB1/STAT1/LIF	4
BP	GO:0001945	lymph vessel development	0.000667579	0.00320411	EFNB2/PROX1/EPHA2/BMPR2/PDPN	5
BP	GO:0060055	angiogenesis involved in wound healing	0.000667579	0.00320411	XBP1/ALOX5/ITGB3/TNFAIP3/SERPINE1	5
BP	GO:0097205	renal filtration	0.000667579	0.00320411	SULF1/ITGA3/EDNRA/F2R/AQP1	5
BP	GO:0038127	ERBB signaling pathway	0.00069743	0.00334398	AGR2/RALA/ERBB4/CEACAM1/PSEN1/MMP9/PLAUR/EGF/AREG/EREG	10
BP	GO:0048511	rhythmic process	0.000705707	0.00338023	PML/PROX1/TOP2A/INHBA/BHLHE40/AHR/ID1/DTL/PPARG/NTRK2/CDK1/TYMS/TNFAIP6/MMP2/TGFB2/EREG/CYP1B1	17
BP	GO:0050919	negative chemotaxis	0.000709926	0.00339355	EFNA5/SEMA7A/WNT5A/ITGAV/ROBO1/ITGB3	6
BP	GO:0090199	regulation of release of cytochrome c from mitochondria	0.000709926	0.00339355	BCL2L1/CLU/MMP9/PLAUR/BNIP3/TNFSF10	6
BP	GO:0072331	signal transduction by p53 class mediator	0.000714306	0.00341103	PML/NUAK1/E2F7/CHEK1/BRCA2/MYC/IFI16/MUC1/NDRG1/CD74/ANKRD1/TP63	12
BP	GO:0035050	embryonic heart tube development	0.000718991	0.00342993	EDNRA/WNT5A/ACVR1/PSEN1/CTNNB1/STIL/GATA4/HIF1A	8
CC	GO:0042470	melanosome	0.000749794	0.00346457	SLC2A1/CAPG/ANXA2/MMP14/ITGB1/CALU/CTSB/TFRC/ITGB3	9
CC	GO:0048770	pigment granule	0.000749794	0.00346457	SLC2A1/CAPG/ANXA2/MMP14/ITGB1/CALU/CTSB/TFRC/ITGB3	9
MF	GO:0030246	carbohydrate binding	0.000340043	0.00347771	LGALS3/EGLN3/HK2/P4HA1/HK1/VCAN/LOXL2/PFKP/LGALS1/GPI/OLR1/PLOD2/MRC1/HLA-DRA/PYGL/SLC2A3/HLA-DRB1	17
BP	GO:0008585	female gonad development	0.000736397	0.00350635	MMP14/BCL2L1/INHBA/BRCA2/TNFAIP6/MMP2/KITLG/EREG/SFRP1	9
BP	GO:0003170	heart valve development	0.000737289	0.00350635	ACVR1/PRDM1/BMPR2/EFNA1/ROBO1/GATA4/TGFB2	7
BP	GO:0015800	acidic amino acid transport	0.000737289	0.00350635	SLC6A6/ITGB1/PSEN1/ARL6IP1/SLC25A12/SLC1A2/NTRK2	7
BP	GO:0019693	ribose phosphate metabolic process	0.000737983	0.00350635	PKM/HK2/ENO2/PGK1/HK1/GAPDH/PFKP/LDHA/PDK4/ACAT1/PSEN1/AK4/EPHA2/NT5E/SLC25A12/ENO1/ALDOC/TPST2/GPI/BPNT1/PYGL/SLC4A4/HIF1A	23
BP	GO:0030010	establishment of cell polarity	0.000745067	0.00353644	FERMT1/PRKCI/WNT5A/ITGB1/NDC80/GPSM2/PTK7/MSN/MYH9/PAX6/WEE1	11
CC	GO:0014704	intercalated disc	0.000784868	0.00358205	SLC2A1/ITGB1/CTNNB1/PAK1/CDH2/DSC2	6
CC	GO:0031901	early endosome membrane	0.000793042	0.00358205	PML/MCOLN3/PSEN1/PMEPA1/DKK1/HLA-C/HLA-B/HLA-A/NTRK2/ANXA1/HLA-DRA/CFTR	12
BP	GO:0021700	developmental maturation	0.000759441	0.00360105	FERMT1/RUNX2/EDNRA/WNT5A/GREM1/CTNNB1/TRIP13/BRCA2/PPARG/KIF14/TYMS/MMP2/TGFB2/HIF1A/EREG/CFTR/NR4A2	17
BP	GO:0009150	purine ribonucleotide metabolic process	0.00077297	0.00365913	PKM/HK2/ENO2/PGK1/HK1/GAPDH/PFKP/LDHA/PDK4/ACAT1/PSEN1/AK4/EPHA2/NT5E/SLC25A12/ENO1/ALDOC/TPST2/GPI/BPNT1/SLC4A4/HIF1A	22
BP	GO:0003338	metanephros morphogenesis	0.000776344	0.00365913	GREM1/CTNNB1/STAT1/PDGFRB/LIF	5
BP	GO:0010165	response to X-ray	0.000776344	0.00365913	XRCC4/BRCA2/ANXA1/SFRP2/SFRP1	5
BP	GO:0045671	negative regulation of osteoclast differentiation	0.000776344	0.00365913	CTNNB1/FBN1/TNFRSF11B/TNFAIP6/SFRP1	5
BP	GO:0061036	positive regulation of cartilage development	0.000776344	0.00365913	RUNX2/WNT5A/LOXL2/BMPR2/BMP1	5
BP	GO:1901889	negative regulation of cell junction assembly	0.000776344	0.00365913	MMP14/WNT5A/DKK1/CORO1C/THBS1	5
BP	GO:0008625	extrinsic apoptotic signaling pathway via death domain receptors	0.000777975	0.00366316	LGALS3/BCL2L1/SKIL/SFRP2/TNFAIP3/SFRP1/THBS1/SERPINE1	8
BP	GO:0003197	endocardial cushion development	0.000795745	0.00373937	ACVR1/BMPR2/ROBO1/GATA4/TGFBR1/TGFB2	6
BP	GO:0060976	coronary vasculature development	0.000795745	0.00373937	PRDM1/PTK7/PDGFRB/TGFBR1/TGFBR3/GPC3	6
CC	GO:0090543	Flemming body	0.00084413	0.00377045	CAPG/RALA/RACGAP1/KIF23/KIF14	5
BP	GO:0072577	endothelial cell apoptotic process	0.000808639	0.00379618	PRKCI/PDCD4/BMPR2/TNFAIP3/CCL2/THBS1/SERPINE1	7
BP	GO:0034504	protein localization to nucleus	0.000816638	0.00382992	FERMT1/ECT2/PML/PSEN1/HHEX/MMP12/XPO1/COL1A1/FLNA/CDK1/TXN/KPNA2/LMNB1/GBP2/LIF/TFRC/PTGS2	17
BP	GO:0002544	chronic inflammatory response	0.000828843	0.00387944	IDO1/TNFAIP3/THBS1/VNN1	4
BP	GO:0072087	renal vesicle development	0.000828843	0.00387944	GREM1/CTNNB1/STAT1/LIF	4
BP	GO:1902905	positive regulation of supramolecular fiber organization	0.000830993	0.00388426	MET/CTTN/PROX1/PSEN1/CLU/PAK1/ID1/COLGALT1/TGFBR1/SDC4/NCKAP1L/SFRP1	12
BP	GO:0062013	positive regulation of small molecule metabolic process	0.000831518	0.00388426	PSEN1/SLC25A12/ENO1/PPARG/ANXA1/SLC4A4/CD74/HIF1A/ADM/PTGS2/NR4A3	11
BP	GO:0045931	positive regulation of mitotic cell cycle	0.000837457	0.00390813	CCNB1/DLGAP5/STIL/BRCA2/CDC6/DTL/UBE2C/CDK1/ANXA1/DDR2	10
BP	GO:0002088	lens development in camera-type eye	0.000840786	0.00391979	WNT5A/PROX1/EPHA2/CTNNB1/SKIL/WNT2/TGFBR1/PAX6	8
BP	GO:0031349	positive regulation of defense response	0.000846591	0.00394296	ITGA2/TNFSF4/WNT5A/CAMK2N1/MMP12/PAK1/PDCD4/IL18/PTGER4/LGALS1/NMI/IFI16/IDO1/OSMR/EREG/PTGS2/SERPINE1	17
BP	GO:0010001	glial cell differentiation	0.000855567	0.00397967	LEF1/PSEN1/CTNNB1/CLU/NFIB/NTRK2/CDH2/BNIP3/TNFRSF21/CDK1/LIF/LRP1/NDRG1/PAX6	14
BP	GO:0044843	cell cycle G1/S phase transition	0.000856161	0.00397967	PML/ITGB1/ACVR1/INHBA/FAM83D/E2F7/STIL/CDC6/MYC/CCNA2/KIF14/ANXA1/MUC1/DDR2/WEE1/CCL2	16
BP	GO:0010862	positive regulation of pathway-restricted SMAD protein phosphorylation	0.000889353	0.00412178	ACVR1/INHBA/BMPR2/PPARG/TGFBR1/TGFB2	6
BP	GO:0070509	calcium ion import	0.000889353	0.00412178	LGALS3/CXCL12/CTNNB1/PDGFRB/EGF/CCL2	6
BP	GO:2000404	regulation of T cell migration	0.000889353	0.00412178	WNT5A/ECM1/CXCL12/CCL20/CXCL10/ITGB3	6
BP	GO:0001782	B cell homeostasis	0.000897801	0.0041487	CD74/HIF1A/TNFAIP3/NCKAP1L/IL7R	5
BP	GO:0007143	female meiotic nuclear division	0.000897801	0.0041487	TOP2A/CCNB2/NDC80/TRIP13/EREG	5
BP	GO:0045577	regulation of B cell differentiation	0.000897801	0.0041487	MMP14/INHBA/XBP1/NCKAP1L/SFRP1	5
BP	GO:0008637	apoptotic mitochondrial changes	0.000902156	0.00416067	SFN/HK2/ERBB4/BCL2L1/CLU/MMP9/PLAUR/BNIP3/TNFSF10	9
BP	GO:0061387	regulation of extent of cell growth	0.000902156	0.00416067	FN1/EFNA5/SEMA7A/CTTN/WNT5A/CXCL12/BMPR2/CRABP2/SPP1	9
BP	GO:0001892	embryonic placenta development	0.000907604	0.0041695	KRT19/LEF1/E2F7/PRDM1/WNT2/LIF/HIF1A/ADM	8
BP	GO:0010232	vascular transport	0.000907604	0.0041695	SLC2A1/SLC6A6/SLC7A2/SLC1A2/LRP1/SLC4A4/TFRC/SLC2A3	8
BP	GO:0019915	lipid storage	0.000907604	0.0041695	SQLE/ITGAV/PPARG/RNF213/HILPDA/ABCA1/ITGB3/MSR1	8
BP	GO:0150104	transport across blood-brain barrier	0.000907604	0.0041695	SLC2A1/SLC6A6/SLC7A2/SLC1A2/LRP1/SLC4A4/TFRC/SLC2A3	8
BP	GO:0055074	calcium ion homeostasis	0.000909319	0.00417331	CEMIP/EDNRA/PML/F2R/WNT5A/TGM2/MCOLN3/PSEN1/NT5E/CXCL12/ATP2C1/FLNA/BNIP3/THY1/CXCL10/ITGB3/ADM	17
BP	GO:0048015	phosphatidylinositol-mediated signaling	0.000917302	0.00420586	FN1/ERBB4/F2R/CEACAM1/EZR/PDGFC/IL18/NTRK2/PDGFRB/EGF/TGFB2/DCN	12
BP	GO:0043524	negative regulation of neuron apoptotic process	0.000926123	0.00424218	PRKCI/BTG2/F2R/BCL2L1/PSEN1/KIF14/NTRK2/GPI/HIF1A/CCL2/NR4A2	11
BP	GO:0048588	developmental cell growth	0.000931403	0.00426223	FN1/EFNA5/SEMA7A/EDNRA/CTTN/WNT5A/ITGB1/CXCL12/CTNNB1/BMPR2/GATA4/CRABP2/NEDD4L/SPP1	14
BP	GO:0010639	negative regulation of organelle organization	0.000932462	0.00426294	CAPG/MET/CENPF/BCL2L1/TPX2/TOP2A/CCNB1/RAD21/BUB1/CLU/NDC80/CHEK1/TRIP13/NUF2/PPARG/BNIP3/BUB1B/LIF/TFRC	19
BP	GO:0007127	meiosis I	0.000943053	0.00430719	FANCD2/TOP2A/RAD21/CCNB2/NDC80/RAD51AP1/TRIP13/BRCA2/BRIP1/CKS2	10
BP	GO:0001933	negative regulation of protein phosphorylation	0.000944144	0.004308	IGFBP3/SFN/CEACAM1/CAMK2N1/GREM1/PSEN1/HHEX/PMEPA1/DKK1/PDCD4/PPARG/CORO1C/SFRP2/THY1/LRP1/PAX6/TNFAIP3/SFRP1	18
BP	GO:0046545	development of primary female sexual characteristics	0.0009637	0.00438874	MMP14/BCL2L1/INHBA/BRCA2/TNFAIP6/MMP2/KITLG/EREG/SFRP1	9
BP	GO:0046822	regulation of nucleocytoplasmic transport	0.0009637	0.00438874	FERMT1/ECT2/SFN/PSEN1/XPO1/FLNA/CDK1/TXN/PTGS2	9
BP	GO:0035023	regulation of Rho protein signal transduction	0.000978612	0.00445235	ITGA3/MET/F2R/ITGB1/COL3A1/PDGFRB/ROBO1/ABCA1	8
BP	GO:0002066	columnar/cuboidal epithelial cell development	0.000991215	0.00448806	WNT5A/PRDM1/CDH2/TYMS/PAX6/HIF1A	6
BP	GO:0060043	regulation of cardiac muscle cell proliferation	0.000991215	0.00448806	ERBB4/RUNX1/CDK1/WNT2/TGFBR1/TGFBR3	6
BP	GO:0089718	amino acid import across plasma membrane	0.000991215	0.00448806	SLC6A6/SLC7A2/ITGB1/PSEN1/ARL6IP1/SLC1A2	6
BP	GO:0090102	cochlea development	0.000991215	0.00448806	CTHRC1/WNT5A/HPN/CCNA2/ZEB1/PTK7	6
BP	GO:2001238	positive regulation of extrinsic apoptotic signaling pathway	0.000991215	0.00448806	PML/INHBA/SKIL/TNFSF10/SFRP1/THBS1	6
BP	GO:0034219	carbohydrate transmembrane transport	0.000999805	0.00452261	SLC2A1/EDNRA/HK2/PRKCI/SLC1A2/AQP1/GPC3/SLC2A3/AQP9/NR4A3	10
BP	GO:0060231	mesenchymal to epithelial transition	0.00101728	0.00458407	GREM1/CTNNB1/STAT1/LIF	4
BP	GO:0060749	mammary gland alveolus development	0.00101728	0.00458407	ERBB4/EGF/AREG/HIF1A	4
BP	GO:0061377	mammary gland lobule development	0.00101728	0.00458407	ERBB4/EGF/AREG/HIF1A	4
BP	GO:0072234	metanephric nephron tubule development	0.00101728	0.00458407	ACAT1/STAT1/AQP1/LIF	4
BP	GO:0008643	carbohydrate transport	0.00102946	0.00463455	SLC2A1/EDNRA/HK2/PRKCI/EZR/SLC1A2/AQP1/GPC3/SLC2A3/AQP9/NR4A3	11
BP	GO:0034405	response to fluid shear stress	0.00103285	0.00464093	PDGFRB/TFPI2/MMP2/ABCA1/PTGS2	5
BP	GO:0110110	positive regulation of animal organ morphogenesis	0.00103285	0.00464093	WNT5A/CTNNB1/DKK1/WNT2/ROBO1	5
BP	GO:0050000	chromosome localization	0.001054	0.00473084	CENPF/CCNB1/DLGAP5/FAM83D/NDC80/NUF2/KIF14/GEM	8
BP	GO:0032835	glomerulus development	0.00105586	0.00473084	SULF1/EDNRA/ACTA2/AQP1/PDGFRB/ANGPT2/ITGB3	7
BP	GO:0048645	animal organ formation	0.00105586	0.00473084	SULF1/WNT5A/CTNNB1/DKK1/WNT2/ROBO1/TP63	7
BP	GO:0042770	signal transduction in response to DNA damage	0.00106068	0.00474791	PML/FANCD2/E2F7/CHEK1/BRCA2/DTL/BRIP1/CDK1/MUC1/NDRG1/CD74/ANKRD1	12
MF	GO:0004713	protein tyrosine kinase activity	0.000472175	0.00475699	MST1R/PKM/MET/ERBB4/MELK/EPHA2/EIF2AK2/NTRK2/PDGFRB/DDR2/WEE1	11
BP	GO:0071347	cellular response to interleukin-1	0.00109701	0.00490588	CCL20/GBP2/MMP2/CCL18/HIF1A/ANKRD1/CXCL8/CCL2/SFRP1	9
BP	GO:0050982	detection of mechanical stimulus	0.00110181	0.00491336	ITGA2/COL11A1/CXCL12/CTNNB1/HPN/CDH2	6
BP	GO:0060324	face development	0.00110181	0.00491336	LEF1/EDNRA/WNT5A/COL1A1/DKK1/MMP2	6
BP	GO:0060688	regulation of morphogenesis of a branching structure	0.00110181	0.00491336	SULF1/WNT5A/GREM1/CTNNB1/WNT2/SFRP1	6
BP	GO:0048017	inositol lipid-mediated signaling	0.00111243	0.00495602	FN1/ERBB4/F2R/CEACAM1/EZR/PDGFC/IL18/NTRK2/PDGFRB/EGF/TGFB2/DCN	12
CC	GO:0070938	contractile ring	0.00114511	0.00505862	ANLN/PRC1/MYH9	3
BP	GO:0007163	establishment or maintenance of cell polarity	0.00114613	0.00510135	FERMT1/PRKCI/WNT5A/ITGB1/NDC80/GPSM2/AQP1/PTK7/MSN/MYH9/DST/PAX6/WEE1/NCKAP1L	14
BP	GO:0008361	regulation of cell size	0.00116625	0.00518601	FN1/EFNA5/SEMA7A/CTTN/WNT5A/CXCL12/BMPR2/AQP1/MSN/CRABP2/SPP1/IL7R	12
BP	GO:0050808	synapse organization	0.00117907	0.00522825	EFNA5/ITGA3/EFNB2/ERBB4/CTTN/THBS2/F2R/WNT5A/PPFIBP1/PSEN1/CTNNB1/DKK1/FLNA/SRPX2/SRGAP2C/NTRK2/CDH2/TUBB/EFNA1/COL4A1/TNC	21
BP	GO:0021988	olfactory lobe development	0.00118239	0.00522825	SEMA7A/ERBB4/WNT5A/KIF14/ROBO1	5
BP	GO:0031128	developmental induction	0.00118239	0.00522825	WNT5A/CTNNB1/DKK1/WNT2/ROBO1	5
BP	GO:0042462	eye photoreceptor cell development	0.00118239	0.00522825	PRKCI/PRDM1/NTRK2/THY1/PAX6	5
BP	GO:0043276	anoikis	0.00118239	0.00522825	CEACAM5/ITGB1/PDK4/NTRK2/ITGA5	5
BP	GO:2000406	positive regulation of T cell migration	0.00118239	0.00522825	WNT5A/CXCL12/CCL20/CXCL10/ITGB3	5
BP	GO:0072593	reactive oxygen species metabolic process	0.00119371	0.00527334	NOX4/HK2/PDK4/BNIP3/PDGFRB/DHFR/MMP3/PRDX4/ALOX5/CYBB/HIF1A/HBB/CYP1B1/THBS1	14
BP	GO:0060041	retina development in camera-type eye	0.00120218	0.00530578	PROX1/PSEN1/BMPR2/NTRK2/PDGFRB/COL4A1/THY1/TGFB2/PAX6/HIF1A/CYP1B1	11
MF	GO:0004714	transmembrane receptor protein tyrosine kinase activity	0.000538764	0.00530905	MST1R/MET/ERBB4/EPHA2/NTRK2/PDGFRB/DDR2	7
MF	GO:0004867	serine-type endopeptidase inhibitor activity	0.000549944	0.00530905	ANXA2/SPOCK1/COL6A3/TFPI2/SERPINH1/TFPI/SERPINA5/SERPINB2/SERPINE1	9
MF	GO:0004857	enzyme inhibitor activity	0.000550568	0.00530905	LGALS3/SFN/ANXA2/SPOCK1/GAPDH/CAMK2N1/CIT/COL6A3/TIMP2/BST2/TIMP1/TFPI2/SERPINH1/BIRC3/ANXA1/TFPI/GPC3/SERPINA5/RARRES1/SERPINB2/SERPINE1	21
BP	GO:0060021	roof of mouth development	0.00121867	0.00537355	LEF1/WNT5A/INHBA/ITGB8/PRRX1/TGFBR1/TGFBR3/TGFB2	8
BP	GO:0010002	cardioblast differentiation	0.00123389	0.00540527	ITGB1/GREM1/GATA4/TGFB2	4
BP	GO:0032616	interleukin-13 production	0.00123389	0.00540527	LEF1/TNFSF4/IL18/TNFRSF21	4
BP	GO:0032656	regulation of interleukin-13 production	0.00123389	0.00540527	LEF1/TNFSF4/IL18/TNFRSF21	4
BP	GO:0045063	T-helper 1 cell differentiation	0.00123389	0.00540527	LEF1/TNFSF4/CD80/ANXA1	4
BP	GO:0071636	positive regulation of transforming growth factor beta production	0.00123389	0.00540527	FERMT1/LUM/THBS1/PTGS2	4
BP	GO:0071731	response to nitric oxide	0.00123389	0.00540527	CCNA2/AQP1/MMP3/TXN	4
BP	GO:1903206	negative regulation of hydrogen peroxide-induced cell death	0.00123389	0.00540527	MET/TXN/DDR2/NR4A3	4
BP	GO:0006939	smooth muscle contraction	0.00124486	0.00544829	ITGA2/SULF1/EDNRA/CTTN/F2R/ACTA2/COMP/MYLK/PTGS2	9
BP	GO:0051057	positive regulation of small GTPase mediated signal transduction	0.00125119	0.00546584	F2R/TGM2/ITGAV/COL3A1/PDGFRB/ROBO1/KITLG	7
BP	GO:0051310	metaphase plate congression	0.00125119	0.00546584	CENPF/CCNB1/FAM83D/NDC80/NUF2/KIF14/GEM	7
CC	GO:1990391	DNA repair complex	0.00125383	0.00547869	FANCD2/FANCI/XRCC4/BRCA2	4
BP	GO:0043087	regulation of GTPase activity	0.00127752	0.0055757	EFNA5/ECT2/MET/F2R/WNT5A/TBC1D2/ITGB1/TGM2/RASAL2/EPHA2/CCL20/NTRK2/ITGA6/CORO1C/THY1/RGS1/CCL18/CCL2/SFRP1	19
BP	GO:1905952	regulation of lipid localization	0.00128038	0.00557788	ANXA2/ITGAV/PPARG/EGF/HILPDA/LRP1/ABCA1/IL1A/ITGB3/MSR1/SPP1/THBS1	12
BP	GO:2000045	regulation of G1/S transition of mitotic cell cycle	0.00128038	0.00557788	PML/ACVR1/INHBA/E2F7/STIL/CDC6/KIF14/ANXA1/MUC1/DDR2/WEE1/CCL2	12
BP	GO:0001915	negative regulation of T cell mediated cytotoxicity	0.00130462	0.00561605	CEACAM1/NCKAP1L/IL7R	3
BP	GO:0003129	heart induction	0.00130462	0.00561605	WNT5A/DKK1/ROBO1	3
BP	GO:0003183	mitral valve morphogenesis	0.00130462	0.00561605	ACVR1/BMPR2/EFNA1	3
BP	GO:0018401	peptidyl-proline hydroxylation to 4-hydroxy-L-proline	0.00130462	0.00561605	EGLN3/P4HA1/PRDX4	3
BP	GO:0045625	regulation of T-helper 1 cell differentiation	0.00130462	0.00561605	TNFSF4/CD80/ANXA1	3
BP	GO:0048263	determination of dorsal identity	0.00130462	0.00561605	ACVR1/GREM1/CTNNB1	3
BP	GO:0048664	neuron fate determination	0.00130462	0.00561605	PROX1/CTNNB1/PRRX1	3
BP	GO:0048865	stem cell fate commitment	0.00130462	0.00561605	EDNRA/SFRP2/SFRP1	3
BP	GO:0055015	ventricular cardiac muscle cell development	0.00130462	0.00561605	PROX1/FHL2/CDK1	3
BP	GO:0061626	pharyngeal arch artery morphogenesis	0.00130462	0.00561605	EDNRA/BMPR2/TGFB2	3
BP	GO:0062042	regulation of cardiac epithelial to mesenchymal transition	0.00130462	0.00561605	ACVR1/TGFBR1/TGFB2	3
BP	GO:1902946	protein localization to early endosome	0.00130462	0.00561605	EZR/EGF/MSN	3
BP	GO:2000347	positive regulation of hepatocyte proliferation	0.00130462	0.00561605	HPN/XBP1/TNFAIP3	3
BP	GO:0042594	response to starvation	0.00130667	0.00561975	SLC2A1/PDK4/ACAT1/NUAK1/EIF2AK2/BMPR2/CTSK/XBP1/FAS/IFI16/DSC2/ADM/SFRP1	13
CC	GO:1904724	tertiary granule lumen	0.0013052	0.00564183	ALDOC/LYZ/TIMP2/MMP9/TNFAIP6/HBB	6
BP	GO:0009259	ribonucleotide metabolic process	0.00132162	0.00567886	PKM/HK2/ENO2/PGK1/HK1/GAPDH/PFKP/LDHA/PDK4/ACAT1/PSEN1/AK4/EPHA2/NT5E/SLC25A12/ENO1/ALDOC/TPST2/GPI/BPNT1/SLC4A4/HIF1A	22
BP	GO:0002526	acute inflammatory response	0.00132459	0.00568646	FN1/TNFSF4/ACVR1/KLKB1/OSMR/IL1A/TFRC/PTGS2/VNN1	9
BP	GO:0061982	meiosis I cell cycle process	0.00132712	0.00569214	FANCD2/TOP2A/RAD21/CCNB2/NDC80/RAD51AP1/TRIP13/BRCA2/BRIP1/CKS2	10
BP	GO:0034767	positive regulation of ion transmembrane transport	0.00134083	0.0057457	CEMIP/EDNRA/F2R/ITGB1/PSEN1/ARL6IP1/FLNA/THY1/CXCL10/GLRX/CFTR/CCL2	12
BP	GO:1903580	positive regulation of ATP metabolic process	0.00134737	0.00576852	PSEN1/SLC25A12/ENO1/SLC4A4/HIF1A	5
BP	GO:0048260	positive regulation of receptor-mediated endocytosis	0.00135114	0.00577419	ANXA2/GREM1/CLU/EGF/SFRP4/SERPINE1	6
BP	GO:0071622	regulation of granulocyte chemotaxis	0.00135114	0.00577419	TNFAIP6/RARRES2/CD74/CXCL8/NCKAP1L/THBS1	6
BP	GO:0042113	B cell activation	0.00139776	0.005968	LEF1/MMP14/TNFSF4/ITGB1/INHBA/HHEX/AHR/BST2/LGALS1/XBP1/TNFRSF21/TFRC/CD74/CDH17/TNFAIP3/NCKAP1L/SFRP1/IL7R	18
BP	GO:0055017	cardiac muscle tissue growth	0.00140322	0.00598214	ERBB4/RUNX1/CDK1/WNT2/GATA4/TGFBR1/TGFBR3/TGFB2	8
BP	GO:0048469	cell maturation	0.00140361	0.00598214	RUNX2/EDNRA/CTNNB1/TRIP13/BRCA2/PPARG/KIF14/TYMS/HIF1A/EREG/CFTR/NR4A2	12
BP	GO:1902806	regulation of cell cycle G1/S phase transition	0.00142251	0.00605724	PML/ACVR1/INHBA/FAM83D/E2F7/STIL/CDC6/KIF14/ANXA1/MUC1/DDR2/WEE1/CCL2	13
BP	GO:0051222	positive regulation of protein transport	0.00142508	0.00606268	ECT2/CEMIP/SFN/EZR/PSEN1/ATP2C1/FLNA/PPARG/CDK1/IL1A/TGFB2/HIF1A/ANKRD1/CFTR/HLA-DRB1/PTGS2	16
BP	GO:0006936	muscle contraction	0.00144275	0.00613235	ITGA2/TPM4/SULF1/EDNRA/CTTN/F2R/DTNA/CALD1/ACTA2/COMP/TPM2/FLNA/ENO1/MYLK/GATA4/DSC2/NEDD4L/PTGS2	18
CC	GO:0034399	nuclear periphery	0.00145795	0.00616944	ANXA2/PML/CENPF/RAD21/SPARC/KIF4A/ALOX5/ENC1/LMNB1/KRT8	10
CC	GO:0072562	blood microparticle	0.00145795	0.00616944	SLC2A1/FN1/CLIC1/CLU/CP/MSN/TFRC/C1S/C1R/HBB	10
BP	GO:0071677	positive regulation of mononuclear cell migration	0.00147371	0.00625829	LGALS3/WNT5A/CXCL12/CCL20/CXCL10/ITGB3/SERPINE1	7
BP	GO:0010888	negative regulation of lipid storage	0.0014808	0.00627146	ITGAV/PPARG/ABCA1/ITGB3	4
BP	GO:0035089	establishment of apical/basal cell polarity	0.0014808	0.00627146	PRKCI/WNT5A/PTK7/MSN	4
BP	GO:0061042	vascular wound healing	0.0014808	0.00627146	XBP1/ALOX5/TNFAIP3/SERPINE1	4
BP	GO:0010883	regulation of lipid storage	0.00149089	0.00630855	ITGAV/PPARG/HILPDA/ABCA1/ITGB3/MSR1	6
BP	GO:0072009	nephron epithelium development	0.00149639	0.00632614	EDNRA/ACAT1/GREM1/CTNNB1/STAT1/MYC/AQP1/LIF/GPC3	9
BP	GO:0002042	cell migration involved in sprouting angiogenesis	0.00150346	0.00635036	EFNB2/ITGB1/GREM1/SRPX2/ANXA1/ROBO1/THBS1/PTGS2	8
BP	GO:0051924	regulation of calcium ion transport	0.00150954	0.00637031	LGALS3/CEMIP/PML/F2R/CXCL12/CTNNB1/PDGFRB/MYLK/EGF/THY1/CXCL10/ITGB3/GEM/CCL2/PTGS2	15
BP	GO:0015849	organic acid transport	0.0015189	0.0064041	SLC2A1/SLC16A3/SLC6A6/SLC7A2/CEACAM1/ITGB1/PSEN1/ARL6IP1/SLC25A12/SLC1A2/PPARG/NTRK2/ANXA1/CRABP2/IL1A/THBS1/AQP9	17
BP	GO:0010092	specification of animal organ identity	0.00152872	0.00642827	WNT5A/CTNNB1/DKK1/WNT2/ROBO1	5
BP	GO:0070229	negative regulation of lymphocyte apoptotic process	0.00152872	0.00642827	EFNA1/IDO1/CD74/HIF1A/IL7R	5
BP	GO:0071312	cellular response to alkaloid	0.00152872	0.00642827	TGM2/BCL2L1/CHEK1/CCNA2/SLC1A2	5
BP	GO:0002705	positive regulation of leukocyte mediated immunity	0.00156216	0.00656302	CD55/TNFSF4/TAP2/HLA-B/IL18/HLA-A/AZGP1/HLA-DRA/TFRC/HLA-DRB1	10
BP	GO:0000079	regulation of cyclin-dependent protein serine/threonine kinase activity	0.00158876	0.00666885	SFN/PROX1/CCNB1/HHEX/CCNB2/CDC6/CCNA2/CKS2/TNFAIP3	9
BP	GO:0002381	immunoglobulin production involved in immunoglobulin-mediated immune response	0.00159595	0.00668117	TNFSF4/HLA-DRA/HLA-DQB1/TFRC/HLA-DQA1/HLA-DPA1/HLA-DRB1	7
BP	GO:0030330	DNA damage response, signal transduction by p53 class mediator	0.00159595	0.00668117	PML/E2F7/BRCA2/MUC1/NDRG1/CD74/ANKRD1	7
BP	GO:2000573	positive regulation of DNA biosynthetic process	0.00159595	0.00668117	NOX4/GREM1/CTNNB1/NEK2/MYC/PDGFRB/CYP1B1	7
BP	GO:0045638	negative regulation of myeloid cell differentiation	0.0016093	0.00672514	CEACAM1/INHBA/CTNNB1/MYC/FBN1/TNFRSF11B/TNFAIP6/SFRP1	8
BP	GO:1903510	mucopolysaccharide metabolic process	0.0016093	0.00672514	CEMIP/EDNRA/B3GNT3/BGN/B4GALT4/EGF/TNFAIP6/DCN	8
BP	GO:1902903	regulation of supramolecular fiber organization	0.00162694	0.00679285	CAPG/MET/CTTN/PROX1/TPX2/AEBP1/PSEN1/CXCL12/CIT/CLU/FLNA/PAK1/ID1/COLGALT1/PTGER4/TGFBR1/SDC4/NCKAP1L/SFRP1	19
BP	GO:0003179	heart valve morphogenesis	0.00164138	0.00683497	ACVR1/BMPR2/EFNA1/ROBO1/GATA4/TGFB2	6
BP	GO:0003229	ventricular cardiac muscle tissue development	0.00164138	0.00683497	COL11A1/EDNRA/PROX1/TGFBR1/TGFBR3/TGFB2	6
BP	GO:0045668	negative regulation of osteoblast differentiation	0.00164138	0.00683497	GREM1/IGFBP5/PPARG/TNFAIP6/AREG/SFRP1	6
MF	GO:0045236	CXCR chemokine receptor binding	0.000744988	0.00698426	CXCL12/CXCL5/CXCL10/CXCL8	4
MF	GO:0098641	cadherin binding involved in cell-cell adhesion	0.000744988	0.00698426	ANXA2/ANXA1/KRT18/EPCAM	4
BP	GO:0045444	fat cell differentiation	0.00170143	0.00707881	LAMB3/PLAC8/MMP11/WNT5A/PPARG/XBP1/BNIP3/ALOX5/SFRP2/RARRES2/SFRP1/PTGS2/NR4A3/NR4A2	14
BP	GO:0070664	negative regulation of leukocyte proliferation	0.00172095	0.00714741	GREM1/CD80/TNFRSF21/PDCD1LG2/IDO1/SDC4/TNFAIP3/HLA-DRB1	8
BP	GO:0072080	nephron tubule development	0.00172095	0.00714741	ACAT1/GREM1/CTNNB1/STAT1/MYC/AQP1/LIF/GPC3	8
BP	GO:0006163	purine nucleotide metabolic process	0.00172585	0.00715529	PKM/HK2/ENO2/PGK1/HK1/GAPDH/PFKP/LDHA/PDK4/ACAT1/PSEN1/AK4/EPHA2/NT5E/SLC25A12/ENO1/ALDOC/TPST2/GPI/BPNT1/SLC4A4/HIF1A	22
BP	GO:0071479	cellular response to ionizing radiation	0.00172594	0.00715529	ECT2/BCL2L1/RAD51AP1/BRCA2/SFRP2/IFI16/SFRP1	7
BP	GO:0040036	regulation of fibroblast growth factor receptor signaling pathway	0.0017274	0.00715529	SULF1/RUNX2/WNT5A/CTNNB1/THBS1	5
BP	GO:0034695	response to prostaglandin E	0.00176014	0.00720242	TNFSF4/PTGER4/TGFBR3/SFRP1	4
BP	GO:0045624	positive regulation of T-helper cell differentiation	0.00176014	0.00720242	TNFSF4/CD80/IL18/ANXA1	4
BP	GO:0060444	branching involved in mammary gland duct morphogenesis	0.00176014	0.00720242	PML/WNT5A/EPHA2/AREG	4
BP	GO:0072170	metanephric tubule development	0.00176014	0.00720242	ACAT1/STAT1/AQP1/LIF	4
BP	GO:0072243	metanephric nephron epithelium development	0.00176014	0.00720242	ACAT1/STAT1/AQP1/LIF	4
BP	GO:1901032	negative regulation of response to reactive oxygen species	0.00176014	0.00720242	MET/TXN/DDR2/NR4A3	4
BP	GO:2000178	negative regulation of neural precursor cell proliferation	0.00176014	0.00720242	BTG2/WNT5A/PROX1/PAX6	4
BP	GO:0002604	regulation of dendritic cell antigen processing and presentation	0.0017632	0.00720242	CD68/CD74/THBS1	3
BP	GO:0003174	mitral valve development	0.0017632	0.00720242	ACVR1/BMPR2/EFNA1	3
BP	GO:0006002	fructose 6-phosphate metabolic process	0.0017632	0.00720242	HK2/HK1/PFKP	3
BP	GO:0021889	olfactory bulb interneuron differentiation	0.0017632	0.00720242	ERBB4/WNT5A/ROBO1	3
BP	GO:0045628	regulation of T-helper 2 cell differentiation	0.0017632	0.00720242	TNFSF4/IL18/ANXA1	3
BP	GO:0048262	determination of dorsal/ventral asymmetry	0.0017632	0.00720242	ACVR1/GREM1/CTNNB1	3
BP	GO:0060601	lateral sprouting from an epithelium	0.0017632	0.00720242	SULF1/WNT5A/TP63	3
BP	GO:1905668	positive regulation of protein localization to endosome	0.0017632	0.00720242	EZR/EGF/MSN	3
BP	GO:2000826	regulation of heart morphogenesis	0.0017632	0.00720242	WNT5A/DKK1/ROBO1	3
BP	GO:0001657	ureteric bud development	0.00183864	0.00749757	SDC1/GREM1/CTNNB1/MYC/SDC4/GPC3/SFRP1/EPCAM	8
BP	GO:0060993	kidney morphogenesis	0.00183864	0.00749757	ERBB4/GREM1/CTNNB1/STAT1/MYC/PDGFRB/LIF/GPC3	8
CC	GO:0032432	actin filament bundle	0.00180816	0.00757167	MST1R/TPM4/PLS3/ACTA2/FLNA/MYLK/MYH9	7
BP	GO:0010822	positive regulation of mitochondrion organization	0.001864	0.00758134	RALA/MMP9/PLAUR/BNIP3/TNFSF10/HIF1A/DCN	7
BP	GO:0060420	regulation of heart growth	0.001864	0.00758134	ERBB4/RUNX1/PROX1/CDK1/WNT2/TGFBR1/TGFBR3	7
BP	GO:0070192	chromosome organization involved in meiotic cell cycle	0.001864	0.00758134	FANCD2/RAD21/SMC4/BUB1/TRIP13/BRIP1/BUB1B	7
BP	GO:0051051	negative regulation of transport	0.00186601	0.00758297	LGALS3/FERMT1/ANXA2/F2R/CEACAM1/INHBA/KLF7/ITGAV/MMP9/EGF/TXN/ANXA1/LIF/CD74/ITGB3/SFRP4/NEDD4L/NCKAP1L/GEM/SFRP1/THBS1/PTGS2	22
BP	GO:1904029	regulation of cyclin-dependent protein kinase activity	0.00189364	0.00768864	SFN/PROX1/CCNB1/HHEX/CCNB2/CDC6/CCNA2/CKS2/TNFAIP3	9
BP	GO:0009595	detection of biotic stimulus	0.00194437	0.00787427	FAP/PAK1/HLA-B/HLA-A/HLA-DRB1	5
BP	GO:0030279	negative regulation of ossification	0.00194437	0.00787427	ECM1/GREM1/DKK1/HIF1A/SFRP1	5
BP	GO:0097242	amyloid-beta clearance	0.00194437	0.00787427	CLU/MARCO/LRP1/MSR1/MME	5
BP	GO:0006875	cellular metal ion homeostasis	0.00194961	0.00788874	CEMIP/EDNRA/PML/F2R/WNT5A/TGM2/MCOLN3/PSEN1/CXCL12/ATP2C1/FLNA/MYC/CP/BNIP3/THY1/CXCL10/IL1A/TFRC/ITGB3/HIF1A	20
BP	GO:0072163	mesonephric epithelium development	0.00196258	0.00792762	SDC1/GREM1/CTNNB1/MYC/SDC4/GPC3/SFRP1/EPCAM	8
BP	GO:0072164	mesonephric tubule development	0.00196258	0.00792762	SDC1/GREM1/CTNNB1/MYC/SDC4/GPC3/SFRP1/EPCAM	8
BP	GO:0006310	DNA recombination	0.00196575	0.00793363	LEF1/FANCD2/TNFSF4/TOP2A/RAD21/XRCC4/MCM6/CHEK1/RAD51AP1/MCM4/TRIP13/BRCA2/SMC6/BRIP1/KPNA2/TFRC/IL7R	17
BP	GO:0002823	negative regulation of adaptive immune response based on somatic recombination of immune receptors built from immunoglobulin superfamily domains	0.00197667	0.0079709	CD55/TNFSF4/CEACAM1/AHR/NCKAP1L/IL7R	6
CC	GO:0030864	cortical actin cytoskeleton	0.00194466	0.00805932	SLC2A1/KRT19/ANLN/CTTN/CALD1/CDH2/MYH9	7
BP	GO:0051047	positive regulation of secretion	0.00200326	0.00807122	SDC1/ANXA2/EZR/INHBA/CXCL12/PPARG/AQP1/XBP1/SDC4/IL1A/TGFB2/HIF1A/ANKRD1/CFTR/HLA-DRB1/SPP1	16
BP	GO:0030859	polarized epithelial cell differentiation	0.00207402	0.00830663	WNT5A/PTK7/MSN/TP63	4
BP	GO:0036303	lymph vessel morphogenesis	0.00207402	0.00830663	PROX1/EPHA2/BMPR2/PDPN	4
BP	GO:0060706	cell differentiation involved in embryonic placenta development	0.00207402	0.00830663	KRT19/E2F7/PRDM1/LIF	4
BP	GO:0061162	establishment of monopolar cell polarity	0.00207402	0.00830663	PRKCI/WNT5A/PTK7/MSN	4
BP	GO:0070233	negative regulation of T cell apoptotic process	0.00207402	0.00830663	EFNA1/IDO1/HIF1A/IL7R	4
BP	GO:0072202	cell differentiation involved in metanephros development	0.00207402	0.00830663	GREM1/CTNNB1/STAT1/LIF	4
BP	GO:2000353	positive regulation of endothelial cell apoptotic process	0.00207402	0.00830663	PRKCI/PDCD4/CCL2/THBS1	4
BP	GO:0010389	regulation of G2/M transition of mitotic cell cycle	0.00209301	0.00836851	CENPF/CCNB1/RAD21/CHEK1/CDC6/DTL/KIF14/CDK1	8
BP	GO:0030512	negative regulation of transforming growth factor beta receptor signaling pathway	0.00209301	0.00836851	PMEPA1/HTRA3/SKIL/ASPN/PPARG/FBN1/HTRA1/TGFBR3	8
MF	GO:0004675	transmembrane receptor protein serine/threonine kinase activity	0.000926025	0.00846704	ACVR1/BMPR2/TGFBR1/TGFBR3	4
MF	GO:0015026	coreceptor activity	0.000928238	0.00846704	ITGB1/ITGAV/CD80/PTK7/TGFBR3/ITGB3	6
BP	GO:0000082	G1/S transition of mitotic cell cycle	0.00213099	0.00850593	PML/ITGB1/ACVR1/INHBA/E2F7/STIL/CDC6/MYC/KIF14/ANXA1/MUC1/DDR2/WEE1/CCL2	14
BP	GO:0009636	response to toxic substance	0.00213099	0.00850593	SDC1/AHR/GPX2/BRIP1/PDGFRB/DHFR/ALDH1A1/CDK1/PRDX4/TYMS/TXN/HBB/CYP1B1/PTGS2	14
CC	GO:0098802	plasma membrane signaling receptor complex	0.00207563	0.00851431	ITGA2/ITGA11/ITGA3/ITGB5/ITGB1/ACVR1/ITGAV/FLNA/ITGA6/ITGBL1/ITGB8/TGFBR1/OSMR/TFRC/ITGA5/ITGB3	16
BP	GO:0051090	regulation of DNA-binding transcription factor activity	0.0021569	0.00860208	PRKCI/FANCD2/TNFSF4/WNT5A/PROX1/BHLHE40/GREM1/CTNNB1/EIF2AK2/CLU/FLNA/ID1/IL18/PPARG/WNT2/CTH/TFRC/SFRP4/DDR2/TNFAIP3/CYP1B1	21
BP	GO:0007131	reciprocal meiotic recombination	0.00216256	0.00860282	FANCD2/TOP2A/RAD21/RAD51AP1/TRIP13/BRIP1	6
BP	GO:0045620	negative regulation of lymphocyte differentiation	0.00216256	0.00860282	TNFSF4/RUNX1/INHBA/ANXA1/CD74/SFRP1	6
BP	GO:0140527	reciprocal homologous recombination	0.00216256	0.00860282	FANCD2/TOP2A/RAD21/RAD51AP1/TRIP13/BRIP1	6
BP	GO:0001953	negative regulation of cell-matrix adhesion	0.00218059	0.00863815	MMP14/MMP12/CORO1C/THBS1/SERPINE1	5
BP	GO:0030866	cortical actin cytoskeleton organization	0.00218059	0.00863815	ECT2/ANLN/RACGAP1/EZR/NCKAP1L	5
BP	GO:0042307	positive regulation of protein import into nucleus	0.00218059	0.00863815	ECT2/PSEN1/FLNA/CDK1/PTGS2	5
BP	GO:0045923	positive regulation of fatty acid metabolic process	0.00218059	0.00863815	PPARG/ANXA1/CD74/PTGS2/NR4A3	5
BP	GO:0048246	macrophage chemotaxis	0.00218059	0.00863815	LGALS3/MMP2/RARRES2/CCL2/THBS1	5
BP	GO:0003012	muscle system process	0.00221416	0.00876377	ITGA2/TPM4/SULF1/EDNRA/CTTN/F2R/DTNA/IGFBP5/CALD1/ACTA2/COMP/TPM2/FLNA/ENO1/PPARG/MYLK/GATA4/DSC2/NEDD4L/PTGS2/NR4A3	21
BP	GO:0030203	glycosaminoglycan metabolic process	0.00224356	0.00887269	CEMIP/EDNRA/B3GNT3/BGN/B4GALT4/PDGFRB/EGF/TNFAIP6/DCN	9
BP	GO:0002424	T cell mediated immune response to tumor cell	0.00231082	0.00906272	AHR/HLA-A/HLA-DRB1	3
BP	GO:0003306	Wnt signaling pathway involved in heart development	0.00231082	0.00906272	WNT5A/CTNNB1/DKK1	3
BP	GO:0009950	dorsal/ventral axis specification	0.00231082	0.00906272	CTNNB1/PAX6/SFRP1	3
BP	GO:0033629	negative regulation of cell adhesion mediated by integrin	0.00231082	0.00906272	MUC1/CYP1B1/SERPINE1	3
BP	GO:0043380	regulation of memory T cell differentiation	0.00231082	0.00906272	TNFSF4/HLA-DRA/HLA-DRB1	3
BP	GO:0070601	centromeric sister chromatid cohesion	0.00231082	0.00906272	CTNNB1/BUB1/BUB1B	3
BP	GO:0072182	regulation of nephron tubule epithelial cell differentiation	0.00231082	0.00906272	CTNNB1/STAT1/LIF	3
BP	GO:1904338	regulation of dopaminergic neuron differentiation	0.00231082	0.00906272	DKK1/SFRP2/SFRP1	3
BP	GO:1904953	Wnt signaling pathway involved in midbrain dopaminergic neuron differentiation	0.00231082	0.00906272	WNT5A/CTNNB1/WNT2	3
BP	GO:1905666	regulation of protein localization to endosome	0.00231082	0.00906272	EZR/EGF/MSN	3
BP	GO:0001912	positive regulation of leukocyte mediated cytotoxicity	0.00236132	0.00922245	TAP2/HLA-B/HLA-A/AZGP1/HLA-DRA/HLA-DRB1	6
BP	GO:0002763	positive regulation of myeloid leukocyte differentiation	0.00236132	0.00922245	LEF1/RUNX1/LIF/KITLG/CD74/HLA-DRB1	6
BP	GO:0010574	regulation of vascular endothelial growth factor production	0.00236132	0.00922245	SULF1/GATA4/IL1A/HIF1A/CYP1B1/PTGS2	6
BP	GO:0042306	regulation of protein import into nucleus	0.00236132	0.00922245	FERMT1/ECT2/PSEN1/FLNA/CDK1/PTGS2	6
BP	GO:0051653	spindle localization	0.00236132	0.00922245	ITGB1/ASPM/NDC80/GPSM2/MYH9/PAX6	6
BP	GO:0009746	response to hexose	0.0023658	0.0092323	NOX4/EFNA5/RASAL2/KLF7/XBP1/ANGPT2/GATA4/HIF1A/CFTR/HLA-DRB1/THBS1/PTGS2	12
BP	GO:0072676	lymphocyte migration	0.00237099	0.00924491	WNT5A/ECM1/CXCL12/CCL20/MSN/CXCL10/CCL18/ITGB3/CCL2	9
MF	GO:0070888	E-box binding	0.00103683	0.00933146	BHLHE40/AHR/MYC/PPARG/ZEB1/HIF1A	6
BP	GO:0021801	cerebral cortex radial glia-guided migration	0.0024245	0.00938614	CTNNB1/COL3A1/SRGAP2C/LAMB1	4
BP	GO:0022030	telencephalon glial cell migration	0.0024245	0.00938614	CTNNB1/COL3A1/SRGAP2C/LAMB1	4
BP	GO:0046641	positive regulation of alpha-beta T cell proliferation	0.0024245	0.00938614	CD55/TNFSF4/IL18/HLA-A	4
BP	GO:0046697	decidualization	0.0024245	0.00938614	CTSB/LIF/SPP1/PTGS2	4
BP	GO:0050860	negative regulation of T cell receptor signaling pathway	0.0024245	0.00938614	LGALS3/CEACAM1/EZR/THY1	4
BP	GO:0051984	positive regulation of chromosome segregation	0.0024245	0.00938614	CCNB1/SMC4/SMC6/CDC6	4
BP	GO:0060575	intestinal epithelial cell differentiation	0.0024245	0.00938614	PRDM1/TYMS/GATA4/HIF1A	4
BP	GO:0061339	establishment or maintenance of monopolar cell polarity	0.0024245	0.00938614	PRKCI/WNT5A/PTK7/MSN	4
BP	GO:1904951	positive regulation of establishment of protein localization	0.00243608	0.00938614	ECT2/CEMIP/SFN/EZR/PSEN1/ATP2C1/FLNA/PPARG/CDK1/IL1A/TGFB2/HIF1A/ANKRD1/CFTR/HLA-DRB1/PTGS2	16
BP	GO:0010719	negative regulation of epithelial to mesenchymal transition	0.00243705	0.00938614	HPN/EFNA1/SFRP2/TGFB2/SFRP1	5
BP	GO:0046688	response to copper ion	0.00243705	0.00938614	LOXL2/AQP1/CDK1/IL1A/TFRC	5
BP	GO:0060421	positive regulation of heart growth	0.00243705	0.00938614	ERBB4/PROX1/CDK1/WNT2/TGFBR3	5
BP	GO:0072595	maintenance of protein localization in organelle	0.00243705	0.00938614	HK2/PML/HK1/KDELR3/TXN	5
BP	GO:1901031	regulation of response to reactive oxygen species	0.00243705	0.00938614	MET/DHFR/TXN/DDR2/NR4A3	5
BP	GO:1905314	semi-lunar valve development	0.00243705	0.00938614	BMPR2/EFNA1/ROBO1/GATA4/TGFB2	5
BP	GO:0010950	positive regulation of endopeptidase activity	0.00246082	0.00946995	EGLN3/PML/F2R/MYC/PPARG/EFNA1/ROBO1/SFRP2/FAS/IFI16/TNFSF10	11
BP	GO:0015833	peptide transport	0.00246444	0.00947615	EFNA5/KLF7/TAP1/TAP2/AQP1/ALOX5/ANXA1/ABCA1/CD74/HIF1A/CDH17/CFTR/HLA-DRB1/SFRP1	14
BP	GO:0098742	cell-cell adhesion via plasma-membrane adhesion molecules	0.0024715	0.00949553	CEACAM5/EFNA5/PCDH7/CDH11/MPZL2/CEACAM1/ITGB1/ACVR1/ATP2C1/CDH2/ROBO1/ITGA5/DSC2/TGFB2/CDH17	15
CC	GO:0005766	primary lysosome	0.0023894	0.00960538	PYGB/ANXA2/PLAC8/PSEN1/LYZ/BST2/TUBB/CD68/PRSS2/VNN1	10
CC	GO:0042582	azurophil granule	0.0023894	0.00960538	PYGB/ANXA2/PLAC8/PSEN1/LYZ/BST2/TUBB/CD68/PRSS2/VNN1	10
BP	GO:0019730	antimicrobial humoral response	0.00250411	0.009613	GAPDH/CXCL5/LYZ/HLA-A/RARRES2/CXCL10/CXCL14/PRSS2/CXCL8	9
BP	GO:0001823	mesonephros development	0.0025256	0.00968762	SDC1/GREM1/CTNNB1/MYC/SDC4/GPC3/SFRP1/EPCAM	8
BP	GO:0043547	positive regulation of GTPase activity	0.0025562	0.00979702	ECT2/F2R/WNT5A/TBC1D2/ITGB1/TGM2/EPHA2/CCL20/ITGA6/CORO1C/THY1/RGS1/CCL18/CCL2/SFRP1	15
BP	GO:0009267	cellular response to starvation	0.00257286	0.00983946	SLC2A1/PDK4/NUAK1/EIF2AK2/BMPR2/CTSK/XBP1/FAS/IFI16/DSC2/SFRP1	11
BP	GO:1905517	macrophage migration	0.00257353	0.00983946	LGALS3/MMP14/MMP2/RARRES2/CCL2/THBS1	6
BP	GO:2000351	regulation of endothelial cell apoptotic process	0.00257353	0.00983946	PRKCI/PDCD4/TNFAIP3/CCL2/THBS1/SERPINE1	6
CC	GO:0005765	lysosomal membrane	0.00255264	0.0100413	ANXA2/MCOLN3/PSEN1/ANPEP/VLDLR/BST2/CP/EGF/IFITM1/LRP1/CD68/HLA-DRA/HLA-DQB1/CD74/HLA-DQA1/HLA-DPA1/CFTR/HLA-DRB1/VNN1	19
CC	GO:0098852	lytic vacuole membrane	0.00255264	0.0100413	ANXA2/MCOLN3/PSEN1/ANPEP/VLDLR/BST2/CP/EGF/IFITM1/LRP1/CD68/HLA-DRA/HLA-DQB1/CD74/HLA-DQA1/HLA-DPA1/CFTR/HLA-DRB1/VNN1	19
CC	GO:0001931	uropod	0.00259776	0.0100413	EZR/MSN/MYH9	3
CC	GO:0031254	cell trailing edge	0.00259776	0.0100413	EZR/MSN/MYH9	3
BP	GO:0006874	cellular calcium ion homeostasis	0.00264329	0.010098	CEMIP/EDNRA/PML/F2R/WNT5A/TGM2/MCOLN3/PSEN1/CXCL12/ATP2C1/FLNA/BNIP3/THY1/CXCL10/ITGB3	15
BP	GO:0019233	sensory perception of pain	0.00268435	0.0102331	ITGA2/F2R/CXCL12/AQP1/IL1A/MME/CCL2/PTGS2	8
BP	GO:0048477	oogenesis	0.00268435	0.0102331	EDNRA/CTNNB1/ASPM/TRIP13/BRCA2/LGR5/TNFAIP6/EREG	8
BP	GO:0014855	striated muscle cell proliferation	0.00268734	0.0102331	ERBB4/RUNX1/CDK1/WNT2/TGFBR1/TGFBR3/TGFB2	7
BP	GO:0072332	intrinsic apoptotic signaling pathway by p53 class mediator	0.00268734	0.0102331	PML/BRCA2/MYC/IFI16/MUC1/CD74/TP63	7
BP	GO:0015711	organic anion transport	0.00271316	0.0103125	SLC2A1/SLC16A3/SLC6A6/SLC7A2/CEACAM1/ITGB1/PSEN1/ARL6IP1/SLC25A12/SLC1A2/NTRK2/ANXA1/IL1A/SLC4A4/SLC2A3/CFTR/PTGS2/AQP9	18
BP	GO:0031670	cellular response to nutrient	0.00271473	0.0103125	POSTN/COL1A1/BRIP1/XBP1/SFRP1	5
BP	GO:2000403	positive regulation of lymphocyte migration	0.00271473	0.0103125	WNT5A/CXCL12/CCL20/CXCL10/ITGB3	5
BP	GO:0051961	negative regulation of nervous system development	0.0027288	0.0103576	SEMA7A/WNT5A/PROX1/PSEN1/CTNNB1/DKK1/ID1/THY1/PAX6/SPP1	10
BP	GO:0072659	protein localization to plasma membrane	0.00273282	0.0103645	LGALS3/AGR2/ITGA3/MMP14/PRKCI/ITGB1/BCL2L1/EZR/EPHA2/ATP2C1/FLNA/LRRC15/CDH2/LRP1/KRT18	15
BP	GO:0034113	heterotypic cell-cell adhesion	0.00279973	0.0106097	ITGB1/ITGAV/THY1/ITGA5/ITGB3/DSC2	6
BP	GO:0001764	neuron migration	0.0028093	0.0106114	ITGA3/SPOCK1/PSEN1/CXCL12/CTNNB1/ASPM/COL3A1/SRGAP2C/NTRK2/PAX6/NR4A2	11
BP	GO:0019827	stem cell population maintenance	0.0028093	0.0106114	FANCD2/PROX1/LOXL2/CTNNB1/ASPM/MYC/CDH2/PRRX1/LIF/TP63/SFRP1	11
BP	GO:0002726	positive regulation of T cell cytokine production	0.00281365	0.0106114	CD55/TNFSF4/IL18/HLA-A	4
BP	GO:0048596	embryonic camera-type eye morphogenesis	0.00281365	0.0106114	WNT5A/PROX1/ZEB1/PAX6	4
BP	GO:0050926	regulation of positive chemotaxis	0.00281365	0.0106114	ITGA2/CXCL12/ANGPT2/CXCL8	4
BP	GO:1905048	regulation of metallopeptidase activity	0.00281365	0.0106114	ANTXR1/TIMP2/TIMP1/LRP1	4
BP	GO:0110020	regulation of actomyosin structure organization	0.0028508	0.0107429	ECT2/MET/PROX1/PAK1/PTGER4/TGFBR1/SDC4/SFRP1	8
BP	GO:0031016	pancreas development	0.00288105	0.0108396	MET/WNT5A/PROX1/CTNNB1/CDH2/ANXA1/PAX6	7
BP	GO:0051303	establishment of chromosome localization	0.00288105	0.0108396	CENPF/CCNB1/FAM83D/NDC80/NUF2/KIF14/GEM	7
BP	GO:0007144	female meiosis I	0.00295286	0.0110218	CCNB2/NDC80/TRIP13	3
BP	GO:0031392	regulation of prostaglandin biosynthetic process	0.00295286	0.0110218	ANXA1/CD74/PTGS2	3
BP	GO:0033690	positive regulation of osteoblast proliferation	0.00295286	0.0110218	CTHRC1/ITGAV/ITGB3	3
BP	GO:0043379	memory T cell differentiation	0.00295286	0.0110218	TNFSF4/HLA-DRA/HLA-DRB1	3
BP	GO:0045741	positive regulation of epidermal growth factor-activated receptor activity	0.00295286	0.0110218	EGF/AREG/EREG	3
BP	GO:0048012	hepatocyte growth factor receptor signaling pathway	0.00295286	0.0110218	ESM1/MET/PAK1	3
BP	GO:0060707	trophoblast giant cell differentiation	0.00295286	0.0110218	E2F7/PRDM1/LIF	3
BP	GO:0070243	regulation of thymocyte apoptotic process	0.00295286	0.0110218	WNT5A/EFNA1/HIF1A	3
BP	GO:0072537	fibroblast activation	0.00295286	0.0110218	ACTA2/PDGFRB/DDR2	3
BP	GO:0099550	trans-synaptic signaling, modulating synaptic transmission	0.00295286	0.0110218	F2R/PLAT/NTRK2	3
BP	GO:0033574	response to testosterone	0.00301461	0.0112345	GPI/MSN/CA9/SPP1/THBS1	5
BP	GO:1904037	positive regulation of epithelial cell apoptotic process	0.00301461	0.0112345	PRKCI/PDCD4/SFRP4/CCL2/THBS1	5
BP	GO:0002820	negative regulation of adaptive immune response	0.00304049	0.0112953	CD55/TNFSF4/CEACAM1/AHR/NCKAP1L/IL7R	6
BP	GO:0009994	oocyte differentiation	0.00304049	0.0112953	EDNRA/CTNNB1/TRIP13/BRCA2/LGR5/EREG	6
BP	GO:0043506	regulation of JUN kinase activity	0.00304049	0.0112953	WNT5A/DKK1/PAK1/PDCD4/SFRP2/SFRP1	6
BP	GO:0046824	positive regulation of nucleocytoplasmic transport	0.00304049	0.0112953	ECT2/SFN/PSEN1/FLNA/CDK1/PTGS2	6
BP	GO:0030003	cellular cation homeostasis	0.00307131	0.0113925	CEMIP/EDNRA/PML/F2R/WNT5A/TGM2/MCOLN3/PSEN1/CXCL12/ATP2C1/FLNA/MYC/CP/BNIP3/THY1/CXCL10/IL1A/SLC4A4/TFRC/ITGB3/HIF1A/CFTR	22
BP	GO:0051656	establishment of organelle localization	0.00307148	0.0113925	SDC1/CENPF/ITGB1/EZR/CCNB1/PSEN1/CTNNB1/XPO1/FAM83D/NDC80/NUF2/KIF14/GPSM2/MYH9/LMNB1/SDC4/PAX6/HIF1A/GEM/NR4A3	20
BP	GO:0031570	DNA integrity checkpoint signaling	0.00309697	0.011469	PML/FANCD2/CHEK1/BRCA2/CDC6/DTL/BRIP1/CDK1/MUC1	9
BP	GO:0051928	positive regulation of calcium ion transport	0.00309697	0.011469	LGALS3/CEMIP/F2R/CXCL12/PDGFRB/MYLK/THY1/CXCL10/CCL2	9
CC	GO:0001772	immunological synapse	0.00303908	0.0116353	LGALS3/EZR/MYH9/HLA-DRA/HLA-DRB1	5
BP	GO:1901890	positive regulation of cell junction assembly	0.00320776	0.01187	EFNA5/THBS2/EPHA2/SRPX2/NTRK2/THY1/SDC4/SFRP1	8
BP	GO:0002418	immune response to tumor cell	0.00324347	0.0119273	CEACAM1/AHR/HLA-A/HLA-DRB1	4
BP	GO:0002710	negative regulation of T cell mediated immunity	0.00324347	0.0119273	CEACAM1/AHR/NCKAP1L/IL7R	4
BP	GO:0018126	protein hydroxylation	0.00324347	0.0119273	EGLN3/P4HA1/PRDX4/PLOD2	4
BP	GO:0044342	type B pancreatic cell proliferation	0.00324347	0.0119273	IGFBP3/IGFBP5/SFRP1/NR4A3	4
BP	GO:0061436	establishment of skin barrier	0.00324347	0.0119273	SFN/MET/IL18/TP63	4
BP	GO:0072207	metanephric epithelium development	0.00324347	0.0119273	ACAT1/STAT1/AQP1/LIF	4
BP	GO:0090200	positive regulation of release of cytochrome c from mitochondria	0.00324347	0.0119273	MMP9/PLAUR/BNIP3/TNFSF10	4
BP	GO:1903055	positive regulation of extracellular matrix organization	0.00324347	0.0119273	RUNX1/COLGALT1/PDPN/DDR2	4
BP	GO:0032368	regulation of lipid transport	0.00329487	0.0120748	ANXA2/ITGAV/PPARG/EGF/LRP1/ABCA1/IL1A/ITGB3/SPP1/THBS1	10
BP	GO:1905039	carboxylic acid transmembrane transport	0.00329487	0.0120748	SLC2A1/SLC16A3/SLC6A6/SLC7A2/ITGB1/PSEN1/ARL6IP1/SLC25A12/SLC1A2/THBS1	10
BP	GO:0010573	vascular endothelial growth factor production	0.00329637	0.0120748	SULF1/GATA4/IL1A/HIF1A/CYP1B1/PTGS2	6
BP	GO:0032623	interleukin-2 production	0.00329637	0.0120748	RUNX1/EZR/CD80/ANXA1/IL1A/TNFAIP3	6
BP	GO:0032663	regulation of interleukin-2 production	0.00329637	0.0120748	RUNX1/EZR/CD80/ANXA1/IL1A/TNFAIP3	6
BP	GO:0098727	maintenance of cell number	0.00333473	0.0121976	FANCD2/PROX1/LOXL2/CTNNB1/ASPM/MYC/CDH2/PRRX1/LIF/TP63/SFRP1	11
BP	GO:0006509	membrane protein ectodomain proteolysis	0.00333767	0.0121976	PSEN1/TIMP2/TIMP1/MYH9/MMP7	5
BP	GO:0045840	positive regulation of mitotic nuclear division	0.00333767	0.0121976	DLGAP5/PDGFRB/EGF/IL1A/EREG	5
CC	GO:0031089	platelet dense granule lumen	0.00325241	0.0122193	ECM1/APOH/RARRES2	3
CC	GO:0045120	pronucleus	0.00325241	0.0122193	SLC2A1/CENPF/CCNA2	3
BP	GO:0009913	epidermal cell differentiation	0.00336108	0.0122737	SFN/WNT5A/MCOLN3/EPHA2/CTNNB1/KLF7/ANXA1/IL1A/SFRP4/PAX6/TP63/EREG/KRT8	13
MF	GO:0005114	type II transforming growth factor beta receptor binding	0.00142141	0.0123007	TGFBR1/TGFBR3/TGFB2	3
MF	GO:0017002	activin receptor activity	0.00142141	0.0123007	ACVR1/BMPR2/TGFBR1	3
MF	GO:0042608	T cell receptor binding	0.00142141	0.0123007	HLA-A/HLA-DRA/HLA-DRB1	3
BP	GO:0043254	regulation of protein-containing complex assembly	0.00337121	0.0123011	LGALS3/FERMT1/CAPG/MET/CTTN/PMEPA1/EIF2AK2/CLU/DKK1/PAK1/KIF14/PTGER4/MMP3/MSN/MMP1/ABCA1/TFRC/CDH17/NCKAP1L	19
BP	GO:0015850	organic hydroxy compound transport	0.00343223	0.0125141	SLC16A3/ANXA2/CEACAM1/CXCL12/CLU/PPARG/AQP1/EGF/LRP1/ABCA1/ITGB3/MSR1/CFTR/SPP1/AQP9	15
BP	GO:1903825	organic acid transmembrane transport	0.00345003	0.0125693	SLC2A1/SLC16A3/SLC6A6/SLC7A2/ITGB1/PSEN1/ARL6IP1/SLC25A12/SLC1A2/THBS1	10
CC	GO:0031965	nuclear membrane	0.00339694	0.0126442	SLC16A3/CLIC1/GAPDH/BCL2L1/PSEN1/XPO1/HPN/ENO1/PAK1/DTL/BRIP1/AQP1/ALOX5/LMNB1/PTGS2	15
BP	GO:0044774	mitotic DNA integrity checkpoint signaling	0.00352678	0.012839	PML/FANCD2/CHEK1/CDC6/DTL/CDK1/MUC1	7
BP	GO:0048524	positive regulation of viral process	0.00356796	0.0129689	TMPRSS4/TOP2A/LGALS1/KPNA2/CD74/HLA-DRB1	6
BP	GO:0050891	multicellular organismal water homeostasis	0.00356796	0.0129689	SFN/MET/IL18/AQP1/TP63/CFTR	6
BP	GO:0032231	regulation of actin filament bundle assembly	0.00359851	0.0130598	MET/FLNA/PAK1/ID1/PTGER4/TGFBR1/SDC4/SFRP1	8
BP	GO:0033138	positive regulation of peptidyl-serine phosphorylation	0.00359851	0.0130598	WNT5A/PAK1/NTRK2/TXN/SFRP2/LIF/TFRC/PTGS2	8
BP	GO:0010976	positive regulation of neuron projection development	0.00361094	0.0130875	ITGA3/PRKCI/WNT5A/DPYSL3/VLDLR/FLNA/PTK7/NTRK2/ITGA6/ENC1	10
BP	GO:0002274	myeloid leukocyte activation	0.0036117	0.0130875	FN1/WNT5A/PSEN1/CLU/IL18/ITGB8/NMI/ANXA1/NDRG1/CD74/CXCL8/THBS1/NR4A3	13
BP	GO:0097696	receptor signaling pathway via STAT	0.0036255	0.0131275	ERBB4/F2R/STAT1/IL18/PPARG/EGF/NMI/LIF/CCL2/CYP1B1/IL7R	11
BP	GO:0008631	intrinsic apoptotic signaling pathway in response to oxidative stress	0.0036849	0.0132341	PML/MELK/HIF1A/CYP1B1/VNN1	5
BP	GO:0031295	T cell costimulation	0.0036849	0.0132341	EFNB2/TNFSF4/CD80/LGALS1/PDCD1LG2	5
BP	GO:0007265	Ras protein signal transduction	0.00368896	0.0132341	ITGA3/MET/RALA/F2R/ITGB1/RACGAP1/COL1A2/COL3A1/CCNA2/KIF14/GPSM2/PDGFRB/PDPN/ROBO1/KITLG/ABCA1/TGFB2	17
BP	GO:0007100	mitotic centrosome separation	0.00369421	0.0132341	NEK2/CHEK1/KIF11	3
BP	GO:0018158	protein oxidation	0.00369421	0.0132341	LOXL2/LOXL1/LOX	3
BP	GO:0035791	platelet-derived growth factor receptor-beta signaling pathway	0.00369421	0.0132341	PDGFRB/LRP1/LOX	3
BP	GO:0055012	ventricular cardiac muscle cell differentiation	0.00369421	0.0132341	PROX1/FHL2/CDK1	3
BP	GO:0072160	nephron tubule epithelial cell differentiation	0.00369421	0.0132341	CTNNB1/STAT1/LIF	3
BP	GO:0090715	immunological memory formation process	0.00369421	0.0132341	TNFSF4/HLA-DRA/HLA-DRB1	3
BP	GO:1902043	positive regulation of extrinsic apoptotic signaling pathway via death domain receptors	0.00369421	0.0132341	SKIL/SFRP1/THBS1	3
BP	GO:1902969	mitotic DNA replication	0.00369421	0.0132341	MCM6/MCM4/BRCA2	3
BP	GO:1904321	response to forskolin	0.00369421	0.0132341	EFNA5/AHR/CFTR	3
BP	GO:1904322	cellular response to forskolin	0.00369421	0.0132341	EFNA5/AHR/CFTR	3
BP	GO:1905049	negative regulation of metallopeptidase activity	0.00369421	0.0132341	TIMP2/TIMP1/LRP1	3
BP	GO:0003272	endocardial cushion formation	0.00371591	0.0132615	ACVR1/ROBO1/TGFBR1/TGFB2	4
BP	GO:0003416	endochondral bone growth	0.00371591	0.0132615	ECM1/COMP/MMP13/DDR2	4
BP	GO:1902883	negative regulation of response to oxidative stress	0.00371591	0.0132615	MET/TXN/DDR2/NR4A3	4
BP	GO:1903959	regulation of anion transmembrane transport	0.00371591	0.0132615	ITGB1/PSEN1/ARL6IP1/CFTR	4
BP	GO:1904385	cellular response to angiotensin	0.00371591	0.0132615	INHBA/CDC6/BRIP1/DDR2	4
BP	GO:0001678	cellular glucose homeostasis	0.00377775	0.013472	NOX4/EFNA5/HK2/HK1/KLF7/XBP1/GATA4/HIF1A/CFTR/HLA-DRB1	10
BP	GO:0035825	homologous recombination	0.00385583	0.0137297	FANCD2/TOP2A/RAD21/RAD51AP1/TRIP13/BRIP1	6
BP	GO:1905953	negative regulation of lipid localization	0.00385583	0.0137297	ITGAV/PPARG/EGF/ABCA1/ITGB3/THBS1	6
BP	GO:0042886	amide transport	0.00389382	0.0138545	EFNA5/KLF7/TAP1/TAP2/AQP1/ALOX5/ANXA1/ABCA1/CD74/HIF1A/CDH17/CFTR/HLA-DRB1/SFRP1/AQP9	15
CC	GO:0045335	phagocytic vesicle	0.00378847	0.0139598	ITGB5/ITGAV/TAP1/TAP2/HLA-C/HLA-B/HLA-A/ABCA1/CYBB	9
CC	GO:0005884	actin filament	0.00381984	0.0139598	TPM4/CTTN/PLS3/EZR/DPYSL3/TPM2/PAK1/ANXA1	8
CC	GO:0000775	chromosome, centromeric region	0.00388959	0.0140866	CENPF/TOP2A/CCNB1/PSEN1/RAD21/SMC4/XPO1/BUB1/NEK2/NDC80/SMC6/NUF2/BUB1B	13
BP	GO:0006022	aminoglycan metabolic process	0.00398784	0.0141783	CEMIP/EDNRA/B3GNT3/BGN/B4GALT4/PDGFRB/EGF/TNFAIP6/DCN	9
CC	GO:0090571	RNA polymerase II transcription repressor complex	0.0039994	0.0142165	CTNNB1/MYC/MXD1	3
CC	GO:0030658	transport vesicle membrane	0.00400376	0.0142165	CEACAM1/BCL2L1/HLA-C/HLA-B/HLA-A/HLA-DRA/HLA-DQB1/AREG/CD74/HLA-DQA1/HLA-DPA1/HLA-DRB1	12
CC	GO:0035579	specific granule membrane	0.00403155	0.0142165	PLAU/CEACAM1/ITGAV/PLAUR/OLR1/CYBB/SLC2A3	7
BP	GO:0045069	regulation of viral genome replication	0.00401478	0.0142244	PROX1/TOP2A/EIF2AK2/BST2/IFITM1/IFI16/CXCL8	7
BP	GO:1900182	positive regulation of protein localization to nucleus	0.00401478	0.0142244	ECT2/PSEN1/FLNA/CDK1/LIF/TFRC/PTGS2	7
BP	GO:2000134	negative regulation of G1/S transition of mitotic cell cycle	0.00401478	0.0142244	PML/ACVR1/INHBA/E2F7/MUC1/WEE1/CCL2	7
BP	GO:0072507	divalent inorganic cation homeostasis	0.00401491	0.0142244	CEMIP/EDNRA/PML/F2R/WNT5A/TGM2/MCOLN3/PSEN1/NT5E/CXCL12/ATP2C1/FLNA/BNIP3/THY1/CXCL10/ITGB3/ADM	17
BP	GO:0033673	negative regulation of kinase activity	0.00401586	0.0142244	SFN/CEACAM1/CAMK2N1/PSEN1/HHEX/PDCD4/PPARG/CORO1C/SFRP2/THY1/DDR2/TNFAIP3/SFRP1	13
BP	GO:1902749	regulation of cell cycle G2/M phase transition	0.00402514	0.0142465	CENPF/CCNB1/RAD21/CHEK1/CDC6/DTL/KIF14/CDK1	8
BP	GO:0010837	regulation of keratinocyte proliferation	0.00405727	0.0143495	SFN/EFNB2/ZEB1/AREG/TP63	5
BP	GO:0001756	somitogenesis	0.00416055	0.0146817	LEF1/WNT5A/PSEN1/DKK1/SFRP2/SFRP1	6
BP	GO:0031343	positive regulation of cell killing	0.00416055	0.0146817	TAP2/HLA-B/HLA-A/AZGP1/HLA-DRA/HLA-DRB1	6
BP	GO:0071300	cellular response to retinoic acid	0.00416055	0.0146817	WNT5A/COL1A1/AQP1/PTK7/WNT2/ABCA1	6
BP	GO:0007098	centrosome cycle	0.0041879	0.0147672	CTNNB1/XPO1/NEK2/NDC80/CHEK1/STIL/BRCA2/KIF11/CDK1	9
BP	GO:0001958	endochondral ossification	0.00423292	0.0148593	RUNX2/MMP14/COL1A1/MMP13	4
BP	GO:0003094	glomerular filtration	0.00423292	0.0148593	SULF1/EDNRA/F2R/AQP1	4
BP	GO:0010955	negative regulation of protein processing	0.00423292	0.0148593	PLAU/PLAT/THBS1/SERPINE1	4
BP	GO:0036075	replacement ossification	0.00423292	0.0148593	RUNX2/MMP14/COL1A1/MMP13	4
BP	GO:0090025	regulation of monocyte chemotaxis	0.00423292	0.0148593	GREM1/CXCL12/CXCL10/SERPINE1	4
BP	GO:1903318	negative regulation of protein maturation	0.00423292	0.0148593	PLAU/PLAT/THBS1/SERPINE1	4
BP	GO:0018107	peptidyl-threonine phosphorylation	0.00425256	0.0149172	CEMIP/WNT5A/ACVR1/CIT/CHEK1/EGF/CDK1/TGFBR1	8
BP	GO:0006275	regulation of DNA replication	0.0043957	0.0153964	MCM6/E2F7/MCM4/BRCA2/CDC6/CCNA2/EGF/CDK1/EREG	9
BP	GO:0010565	regulation of cellular ketone metabolic process	0.0043957	0.0153964	CEACAM1/PROX1/PDK4/PPARG/ANXA1/CD74/ADM/PTGS2/NR4A3	9
BP	GO:0016064	immunoglobulin mediated immune response	0.00442362	0.0154827	CD55/TNFSF4/CLU/HLA-DRA/HLA-DQB1/TFRC/C1S/CD74/C1R/HLA-DQA1/HLA-DPA1/HLA-DRB1	12
BP	GO:0031294	lymphocyte costimulation	0.00445576	0.0155721	EFNB2/TNFSF4/CD80/LGALS1/PDCD1LG2	5
BP	GO:1902622	regulation of neutrophil migration	0.00445576	0.0155721	TNFAIP6/IL1A/CD74/CXCL8/NCKAP1L	5
BP	GO:0019511	peptidyl-proline hydroxylation	0.00453924	0.015684	EGLN3/P4HA1/PRDX4	3
BP	GO:0032352	positive regulation of hormone metabolic process	0.00453924	0.015684	HPN/HIF1A/ADM	3
BP	GO:0032905	transforming growth factor beta1 production	0.00453924	0.015684	COL3A1/LUM/THBS1	3
BP	GO:0033689	negative regulation of osteoblast proliferation	0.00453924	0.015684	GREM1/EIF2AK2/SFRP1	3
BP	GO:0045064	T-helper 2 cell differentiation	0.00453924	0.015684	TNFSF4/IL18/ANXA1	3
BP	GO:0045579	positive regulation of B cell differentiation	0.00453924	0.015684	MMP14/XBP1/NCKAP1L	3
BP	GO:0048934	peripheral nervous system neuron differentiation	0.00453924	0.015684	RUNX1/ETV1/NTRK2	3
BP	GO:0048935	peripheral nervous system neuron development	0.00453924	0.015684	RUNX1/ETV1/NTRK2	3
BP	GO:0051299	centrosome separation	0.00453924	0.015684	NEK2/CHEK1/KIF11	3
BP	GO:0060576	intestinal epithelial cell development	0.00453924	0.015684	PRDM1/TYMS/HIF1A	3
BP	GO:0071380	cellular response to prostaglandin E stimulus	0.00453924	0.015684	TNFSF4/PTGER4/SFRP1	3
BP	GO:0072075	metanephric mesenchyme development	0.00453924	0.015684	STAT1/MYC/PDGFRB	3
BP	GO:0072148	epithelial cell fate commitment	0.00453924	0.015684	PROX1/ACVR1/PDPN	3
BP	GO:2001279	regulation of unsaturated fatty acid biosynthetic process	0.00453924	0.015684	ANXA1/CD74/PTGS2	3
BP	GO:0031348	negative regulation of defense response	0.00454068	0.015684	CEACAM1/NT5E/MMP12/HLA-B/HLA-A/PPARG/PTGER4/NMI/ALOX5/TNFAIP6/HTRA1/IFI16/TNFAIP3/HLA-DRB1	14
BP	GO:0051054	positive regulation of DNA metabolic process	0.00454097	0.015684	NOX4/PML/TNFSF4/GREM1/CTNNB1/NEK2/E2F7/RAD51AP1/MYC/PDGFRB/EGF/CDK1/TFRC/EREG/CYP1B1	15
BP	GO:0006469	negative regulation of protein kinase activity	0.004589	0.0158383	SFN/CEACAM1/CAMK2N1/PSEN1/HHEX/PDCD4/PPARG/CORO1C/SFRP2/THY1/TNFAIP3/SFRP1	12
BP	GO:0002831	regulation of response to biotic stimulus	0.00461068	0.0159014	CD55/WNT5A/CEACAM1/MMP12/AHR/STAT1/PAK1/HLA-B/HLA-A/PPARG/NMI/BIRC3/HTRA1/IFI16/EREG/TNFAIP3/HLA-DRB1	17
CC	GO:0031674	I band	0.00456428	0.0159551	SLC2A1/KRT19/PSEN1/CTNNB1/FHL2/FLNA/PAK1/DST/ANKRD1	9
CC	GO:0016342	catenin complex	0.00461208	0.0159832	CDH11/CTNNB1/CDH2/CDH17	4
BP	GO:0010959	regulation of metal ion transport	0.00470833	0.0162264	LGALS3/CEMIP/PML/F2R/ITGB1/CXCL12/CTNNB1/FLNA/PDGFRB/MYLK/EGF/THY1/CXCL10/GLRX/ITGB3/NEDD4L/GEM/CCL2/PTGS2	19
BP	GO:1904659	glucose transmembrane transport	0.00473699	0.0163013	SLC2A1/EDNRA/HK2/PRKCI/SLC1A2/GPC3/SLC2A3/NR4A3	8
BP	GO:1905954	positive regulation of lipid localization	0.00473699	0.0163013	ANXA2/PPARG/HILPDA/LRP1/ABCA1/IL1A/MSR1/SPP1	8
BP	GO:0001556	oocyte maturation	0.00479635	0.0164098	EDNRA/TRIP13/BRCA2/EREG	4
BP	GO:0002825	regulation of T-helper 1 type immune response	0.00479635	0.0164098	TNFSF4/CD80/IL18/ANXA1	4
BP	GO:0007176	regulation of epidermal growth factor-activated receptor activity	0.00479635	0.0164098	PSEN1/EGF/AREG/EREG	4
BP	GO:0060045	positive regulation of cardiac muscle cell proliferation	0.00479635	0.0164098	ERBB4/CDK1/WNT2/TGFBR3	4
BP	GO:0060325	face morphogenesis	0.00479635	0.0164098	LEF1/COL1A1/DKK1/MMP2	4
BP	GO:0070168	negative regulation of biomineral tissue development	0.00479635	0.0164098	ECM1/GREM1/ASPN/HIF1A	4
BP	GO:0090140	regulation of mitochondrial fission	0.00479635	0.0164098	RALA/PPARG/BNIP3/DCN	4
BP	GO:1903205	regulation of hydrogen peroxide-induced cell death	0.00479635	0.0164098	MET/TXN/DDR2/NR4A3	4
CC	GO:0005905	clathrin-coated pit	0.00480104	0.0164127	CEMIP/CTTN/VLDLR/BMPR2/LRP1/TFRC	6
CC	GO:0000307	cyclin-dependent protein kinase holoenzyme complex	0.00481766	0.0164127	CCNB1/CCNB2/CCNA2/CDK1/CKS2	5
BP	GO:0038034	signal transduction in absence of ligand	0.00482287	0.0164767	BCL2L1/INHBA/ITGAV/FAS/KITLG/IL1A	6
BP	GO:0097192	extrinsic apoptotic signaling pathway in absence of ligand	0.00482287	0.0164767	BCL2L1/INHBA/ITGAV/FAS/KITLG/IL1A	6
BP	GO:0001754	eye photoreceptor cell differentiation	0.00488135	0.0166163	PRKCI/PRDM1/NTRK2/THY1/PAX6	5
BP	GO:0001974	blood vessel remodeling	0.00488135	0.0166163	EDNRA/CEACAM1/FLNA/BMPR2/LIF	5
BP	GO:0010171	body morphogenesis	0.00488135	0.0166163	LEF1/COL1A1/DKK1/MMP2/GPC3	5
BP	GO:0045981	positive regulation of nucleotide metabolic process	0.00488135	0.0166163	PSEN1/SLC25A12/ENO1/SLC4A4/HIF1A	5
BP	GO:1900544	positive regulation of purine nucleotide metabolic process	0.00488135	0.0166163	PSEN1/SLC25A12/ENO1/SLC4A4/HIF1A	5
MF	GO:0017134	fibroblast growth factor binding	0.00196219	0.0167656	ITGAV/TGFBR3/ITGB3/THBS1	4
BP	GO:0019724	B cell mediated immunity	0.00493459	0.0167854	CD55/TNFSF4/CLU/HLA-DRA/HLA-DQB1/TFRC/C1S/CD74/C1R/HLA-DQA1/HLA-DPA1/HLA-DRB1	12
CC	GO:0019897	extrinsic component of plasma membrane	0.00501834	0.0169527	ANXA2/CDH11/RACGAP1/CTNNB1/CDH2/WNT2/ANXA1/KPNA2/RGS1/CDH17	10
CC	GO:0044291	cell-cell contact zone	0.0051422	0.0170594	SLC2A1/ITGB1/CTNNB1/PAK1/CDH2/DSC2	6
CC	GO:0098685	Schaffer collateral - CA1 synapse	0.0051422	0.0170594	CDH11/EFNB2/PRKCI/ITGB1/PLAT/CTNNB1	6
CC	GO:0005769	early endosome	0.00517722	0.0170594	ANXA2/PML/F2R/MCOLN3/PSEN1/PMEPA1/DKK1/HLA-C/HLA-B/HLA-A/NTRK2/ANXA1/LRP1/HLA-DRA/TFRC/CFTR/MME/CYTIP	18
BP	GO:0050852	T cell receptor signaling pathway	0.00506765	0.0172256	LGALS3/CEACAM1/EZR/PSEN1/HLA-A/TNFRSF21/THY1/HLA-DQB1/HLA-DRB1	9
BP	GO:0051056	regulation of small GTPase mediated signal transduction	0.0051195	0.0173894	ECT2/ITGA3/MET/F2R/ITGB1/TGM2/RACGAP1/ITGAV/COL3A1/KIF14/PDGFRB/ROBO1/KITLG/ABCA1/TGFB2	15
BP	GO:0030901	midbrain development	0.00514243	0.0174296	WNT5A/CTNNB1/DKK1/WNT2/SFRP2/SFRP1/NR4A2	7
BP	GO:0048525	negative regulation of viral process	0.00514243	0.0174296	LY6E/PROX1/EIF2AK2/STAT1/BST2/IFITM1/IFI16	7
BP	GO:1901216	positive regulation of neuron death	0.00514243	0.0174296	EFNB2/WNT5A/CTNNB1/CLU/DKK1/DDR2/TGFB2	7
BP	GO:0051348	negative regulation of transferase activity	0.00515487	0.0174592	SFN/CEACAM1/CAMK2N1/PSEN1/HHEX/PDCD4/PPARG/CORO1C/BUB1B/SFRP2/THY1/DDR2/TNFAIP3/SFRP1	14
BP	GO:0030104	water homeostasis	0.00518163	0.0174871	SFN/MET/IL18/AQP1/TP63/CFTR	6
BP	GO:0030858	positive regulation of epithelial cell differentiation	0.00518163	0.0174871	SFN/CTNNB1/LIF/SFRP4/PAX6/SERPINE1	6
BP	GO:0051148	negative regulation of muscle cell differentiation	0.00518163	0.0174871	CEACAM5/DKK1/PDCD4/BMPR2/XBP1/EREG	6
BP	GO:0055002	striated muscle cell development	0.00518163	0.0174871	KRT19/SDC1/ITGB1/PROX1/PDGFRB/ANKRD1	6
BP	GO:0055021	regulation of cardiac muscle tissue growth	0.00518163	0.0174871	ERBB4/RUNX1/CDK1/WNT2/TGFBR1/TGFBR3	6
BP	GO:0045933	positive regulation of muscle contraction	0.00533498	0.0179789	ITGA2/CTTN/F2R/ENO1/PTGS2	5
BP	GO:0061178	regulation of insulin secretion involved in cellular response to glucose stimulus	0.00533498	0.0179789	EFNA5/KLF7/HIF1A/CFTR/HLA-DRB1	5
BP	GO:0046578	regulation of Ras protein signal transduction	0.00539793	0.0180701	ITGA3/MET/F2R/ITGB1/COL3A1/KIF14/PDGFRB/ROBO1/KITLG/ABCA1/TGFB2	11
BP	GO:0031069	hair follicle morphogenesis	0.00540802	0.0180701	IGFBP5/CTNNB1/TGFB2/TP63	4
BP	GO:0033561	regulation of water loss via skin	0.00540802	0.0180701	SFN/MET/IL18/TP63	4
BP	GO:0034694	response to prostaglandin	0.00540802	0.0180701	TNFSF4/PTGER4/TGFBR3/SFRP1	4
BP	GO:0045987	positive regulation of smooth muscle contraction	0.00540802	0.0180701	ITGA2/CTTN/F2R/PTGS2	4
BP	GO:0060390	regulation of SMAD protein signal transduction	0.00540802	0.0180701	BMPR2/PPARG/TGFBR1/LRP1	4
BP	GO:0060603	mammary gland duct morphogenesis	0.00540802	0.0180701	PML/WNT5A/EPHA2/AREG	4
BP	GO:0061311	cell surface receptor signaling pathway involved in heart development	0.00540802	0.0180701	WNT5A/ACVR1/CTNNB1/DKK1	4
BP	GO:0071295	cellular response to vitamin	0.00540802	0.0180701	POSTN/COL1A1/BRIP1/SFRP1	4
BP	GO:0098868	bone growth	0.00540802	0.0180701	ECM1/COMP/MMP13/DDR2	4
BP	GO:0110150	negative regulation of biomineralization	0.00540802	0.0180701	ECM1/GREM1/ASPN/HIF1A	4
BP	GO:1902042	negative regulation of extrinsic apoptotic signaling pathway via death domain receptors	0.00540802	0.0180701	BCL2L1/SFRP2/TNFAIP3/SERPINE1	4
BP	GO:1990778	protein localization to cell periphery	0.00545823	0.0181829	LGALS3/AGR2/ITGA3/MMP14/PRKCI/ITGB1/BCL2L1/EZR/EPHA2/ATP2C1/FLNA/GPSM2/LRRC15/CDH2/LRP1/KRT18	16
BP	GO:1903532	positive regulation of secretion by cell	0.00548616	0.0181829	SDC1/ANXA2/EZR/INHBA/CXCL12/PPARG/SDC4/IL1A/TGFB2/HIF1A/ANKRD1/CFTR/HLA-DRB1/SPP1	14
BP	GO:0005980	glycogen catabolic process	0.00549187	0.0181829	PYGB/PGM2/PYGL	3
BP	GO:0021542	dentate gyrus development	0.00549187	0.0181829	LEF1/BTG2/PROX1	3
BP	GO:0030852	regulation of granulocyte differentiation	0.00549187	0.0181829	LEF1/CEACAM1/RUNX1	3
BP	GO:0034112	positive regulation of homotypic cell-cell adhesion	0.00549187	0.0181829	PLAUR/PDPN/MMRN1	3
BP	GO:0034349	glial cell apoptotic process	0.00549187	0.0181829	PRKCI/TNFRSF21/CCL2	3
BP	GO:0043508	negative regulation of JUN kinase activity	0.00549187	0.0181829	PDCD4/SFRP2/SFRP1	3
BP	GO:0045144	meiotic sister chromatid segregation	0.00549187	0.0181829	RAD21/BUB1/BUB1B	3
BP	GO:0051177	meiotic sister chromatid cohesion	0.00549187	0.0181829	RAD21/BUB1/BUB1B	3
BP	GO:0060841	venous blood vessel development	0.00549187	0.0181829	EFNB2/PROX1/BMPR2	3
BP	GO:0060911	cardiac cell fate commitment	0.00549187	0.0181829	ITGB1/ACVR1/DKK1	3
BP	GO:1902033	regulation of hematopoietic stem cell proliferation	0.00549187	0.0181829	WNT5A/EIF2AK2/KITLG	3
BP	GO:0008645	hexose transmembrane transport	0.00554163	0.0183348	SLC2A1/EDNRA/HK2/PRKCI/SLC1A2/GPC3/SLC2A3/NR4A3	8
BP	GO:0003143	embryonic heart tube morphogenesis	0.00555957	0.0183555	WNT5A/ACVR1/PSEN1/STIL/GATA4/HIF1A	6
BP	GO:0032722	positive regulation of chemokine production	0.00555957	0.0183555	TNFSF4/WNT5A/EIF2AK2/IL18/CD74/HIF1A	6
BP	GO:0042130	negative regulation of T cell proliferation	0.00555957	0.0183555	CD80/TNFRSF21/PDCD1LG2/IDO1/SDC4/HLA-DRB1	6
BP	GO:0071692	protein localization to extracellular region	0.00556481	0.01836	EFNA5/F2R/EZR/KLF7/COMP/PPARG/FBN1/ALOX5/ANXA1/ABCA1/IL1A/TGFB2/HIF1A/ANKRD1/CFTR/HLA-DRB1/SFRP1	17
BP	GO:0009749	response to glucose	0.00560731	0.0184873	NOX4/EFNA5/RASAL2/KLF7/XBP1/ANGPT2/GATA4/HIF1A/CFTR/HLA-DRB1/THBS1	11
CC	GO:1902554	serine/threonine protein kinase complex	0.00574382	0.0187534	PRKCI/ACVR1/CCNB1/CCNB2/CCNA2/CDK1/TGFBR1/CKS2	8
CC	GO:0031092	platelet alpha granule membrane	0.00578464	0.0187534	PCDH7/SPARC/ITGB3	3
BP	GO:0062012	regulation of small molecule metabolic process	0.0057687	0.0190061	IGFBP3/CEACAM1/PROX1/PDK4/PSEN1/AK4/SLC25A12/ENO1/PPARG/ANXA1/SLC4A4/CD74/HIF1A/ADM/PTGS2/NR4A3	16
BP	GO:0045185	maintenance of protein location	0.00578824	0.0190439	HK2/PML/HK1/FLNA/KDELR3/FBN1/TXN	7
BP	GO:1904705	regulation of vascular associated smooth muscle cell proliferation	0.00578824	0.0190439	IGFBP5/PDCD4/PPARG/MMP9/MMP2/DDR2/NR4A3	7
BP	GO:0042304	regulation of fatty acid biosynthetic process	0.00581762	0.0190873	CEACAM1/PDK4/ANXA1/CD74/PTGS2	5
BP	GO:0042461	photoreceptor cell development	0.00581762	0.0190873	PRKCI/PRDM1/NTRK2/THY1/PAX6	5
BP	GO:0061082	myeloid leukocyte cytokine production	0.00581762	0.0190873	SEMA7A/WNT5A/CD74/TGFB2/NR4A3	5
BP	GO:1904707	positive regulation of vascular associated smooth muscle cell proliferation	0.00581762	0.0190873	IGFBP5/MMP9/MMP2/DDR2/NR4A3	5
BP	GO:0051495	positive regulation of cytoskeleton organization	0.00582305	0.0190918	MET/CTTN/PROX1/STIL/PAK1/ID1/GPSM2/TGFBR1/SDC4/NCKAP1L/SFRP1	11
MF	GO:0070412	R-SMAD binding	0.00231083	0.0194976	PMEPA1/PPARG/PAX6/ANKRD1	4
BP	GO:0007435	salivary gland morphogenesis	0.00606968	0.0198041	TGM2/NFIB/TGFB2/PAX6	4
BP	GO:0035115	embryonic forelimb morphogenesis	0.00606968	0.0198041	RUNX2/CTNNB1/CRABP2/TP63	4
BP	GO:0035456	response to interferon-beta	0.00606968	0.0198041	STAT1/BST2/IFITM1/IFI16	4
BP	GO:0040020	regulation of meiotic nuclear division	0.00606968	0.0198041	WNT5A/RAD51AP1/TRIP13/LIF	4
BP	GO:0051642	centrosome localization	0.00606968	0.0198041	EZR/DLGAP5/ASPM/GPSM2	4
BP	GO:0061037	negative regulation of cartilage development	0.00606968	0.0198041	GREM1/CTNNB1/CTSK/TGFBR1	4
BP	GO:0061384	heart trabecula morphogenesis	0.00606968	0.0198041	FHL2/TGFBR1/TGFBR3/TGFB2	4
BP	GO:0033135	regulation of peptidyl-serine phosphorylation	0.00608444	0.0198249	WNT5A/DKK1/PAK1/NTRK2/TXN/SFRP2/LIF/TFRC/PTGS2	9
BP	GO:2001056	positive regulation of cysteine-type endopeptidase activity	0.00608444	0.0198249	EGLN3/PML/F2R/MYC/PPARG/ROBO1/FAS/IFI16/TNFSF10	9
BP	GO:0009953	dorsal/ventral pattern formation	0.00613299	0.0199417	ACVR1/GREM1/PSEN1/CTNNB1/BMP1/PAX6/SFRP1	7
BP	GO:0048704	embryonic skeletal system morphogenesis	0.00613299	0.0199417	COL11A1/RUNX2/MMP14/CTNNB1/ZEB1/PRRX1/TGFBR1	7
BP	GO:1900542	regulation of purine nucleotide metabolic process	0.00613299	0.0199417	PDK4/PSEN1/AK4/SLC25A12/ENO1/SLC4A4/HIF1A	7
CC	GO:0005635	nuclear envelope	0.00630092	0.0202638	SLC16A3/CLIC1/GAPDH/CENPF/BCL2L1/PSEN1/XPO1/HPN/ENO1/PAK1/DTL/BRIP1/AQP1/TUBB/BNIP3/ALOX5/LMNB1/DST/CYBB/PTGS2	20
BP	GO:0022604	regulation of cell morphogenesis	0.00627489	0.0203891	FN1/EFNA5/WNT5A/EZR/HPN/FLNA/SPARC/PDPN/CORO1C/MSN/MYH9/ANXA1/ITGB3/NEDD4L/CCL2	15
BP	GO:0007156	homophilic cell adhesion via plasma membrane adhesion molecules	0.00629529	0.0204413	CEACAM5/PCDH7/CDH11/MPZL2/CEACAM1/ITGB1/CDH2/ROBO1/DSC2/CDH17	10
CC	GO:0030133	transport vesicle	0.00642408	0.0204959	CD55/CEACAM1/BCL2L1/BGN/PSEN1/DPYSL3/HLA-C/HLA-B/HLA-A/KDELR3/HLA-DRA/HLA-DQB1/AREG/CD74/HLA-DQA1/HLA-DPA1/MME/HLA-DRB1	18
BP	GO:0022602	ovulation cycle process	0.00633021	0.0204982	INHBA/TNFAIP6/MMP2/TGFB2/EREG	5
BP	GO:0032873	negative regulation of stress-activated MAPK cascade	0.00633021	0.0204982	EZR/PDCD4/MYC/SFRP2/SFRP1	5
BP	GO:0070303	negative regulation of stress-activated protein kinase signaling cascade	0.00633021	0.0204982	EZR/PDCD4/MYC/SFRP2/SFRP1	5
BP	GO:1903793	positive regulation of anion transport	0.00633021	0.0204982	ITGB1/PSEN1/ARL6IP1/IL1A/CFTR	5
BP	GO:0042698	ovulation cycle	0.0063753	0.0206018	INHBA/TNFAIP6/MMP2/TGFB2/EREG/CYP1B1	6
BP	GO:0045600	positive regulation of fat cell differentiation	0.0063753	0.0206018	PPARG/XBP1/SFRP2/RARRES2/SFRP1/PTGS2	6
BP	GO:0070265	necrotic cell death	0.0063753	0.0206018	SLC6A6/BNIP3/BIRC3/FAS/PYGL/DDR2	6
BP	GO:0015749	monosaccharide transmembrane transport	0.00644651	0.0207892	SLC2A1/EDNRA/HK2/PRKCI/SLC1A2/GPC3/SLC2A3/NR4A3	8
BP	GO:0032609	interferon-gamma production	0.00644651	0.0207892	TNFSF4/WNT5A/INHBA/IL18/HLA-A/PDCD1LG2/HLA-DPA1/HLA-DRB1	8
BP	GO:0032649	regulation of interferon-gamma production	0.00644651	0.0207892	TNFSF4/WNT5A/INHBA/IL18/HLA-A/PDCD1LG2/HLA-DPA1/HLA-DRB1	8
BP	GO:1990874	vascular associated smooth muscle cell proliferation	0.00649283	0.0208699	IGFBP5/PDCD4/PPARG/MMP9/MMP2/DDR2/NR4A3	7
BP	GO:0003198	epithelial to mesenchymal transition involved in endocardial cushion formation	0.00655557	0.0208699	ACVR1/TGFBR1/TGFB2	3
BP	GO:0006089	lactate metabolic process	0.00655557	0.0208699	LDHA/SLC25A12/HIF1A	3
BP	GO:0007135	meiosis II	0.00655557	0.0208699	RAD21/BUB1/BUB1B	3
BP	GO:0009251	glucan catabolic process	0.00655557	0.0208699	PYGB/PGM2/PYGL	3
BP	GO:0016045	detection of bacterium	0.00655557	0.0208699	HLA-B/HLA-A/HLA-DRB1	3
BP	GO:0016202	regulation of striated muscle tissue development	0.00655557	0.0208699	LEF1/CENPF/LOX	3
BP	GO:0030949	positive regulation of vascular endothelial growth factor receptor signaling pathway	0.00655557	0.0208699	ITGA5/ITGB3/HIF1A	3
BP	GO:0045198	establishment of epithelial cell apical/basal polarity	0.00655557	0.0208699	WNT5A/PTK7/MSN	3
BP	GO:0051895	negative regulation of focal adhesion assembly	0.00655557	0.0208699	MMP14/CORO1C/THBS1	3
BP	GO:0061983	meiosis II cell cycle process	0.00655557	0.0208699	RAD21/BUB1/BUB1B	3
BP	GO:0070206	protein trimerization	0.00655557	0.0208699	COL1A2/SLC1A2/CD74	3
BP	GO:0071732	cellular response to nitric oxide	0.00655557	0.0208699	CCNA2/AQP1/MMP3	3
BP	GO:0072109	glomerular mesangium development	0.00655557	0.0208699	ACTA2/PDGFRB/ITGB3	3
BP	GO:0072378	blood coagulation, fibrin clot formation	0.00655557	0.0208699	FN1/FLNA/APOH	3
BP	GO:0090399	replicative senescence	0.00655557	0.0208699	CHEK1/MME/SERPINE1	3
BP	GO:0090713	immunological memory process	0.00655557	0.0208699	TNFSF4/HLA-DRA/HLA-DRB1	3
BP	GO:0150118	negative regulation of cell-substrate junction organization	0.00655557	0.0208699	MMP14/CORO1C/THBS1	3
BP	GO:2001267	regulation of cysteine-type endopeptidase activity involved in apoptotic signaling pathway	0.00655557	0.0208699	MMP9/PLAUR/FAS	3
BP	GO:0018210	peptidyl-threonine modification	0.00677172	0.0214493	CEMIP/WNT5A/ACVR1/CIT/CHEK1/EGF/CDK1/TGFBR1	8
BP	GO:0000132	establishment of mitotic spindle orientation	0.00678305	0.0214493	ITGB1/NDC80/GPSM2/PAX6	4
BP	GO:0021772	olfactory bulb development	0.00678305	0.0214493	ERBB4/WNT5A/KIF14/ROBO1	4
BP	GO:0030947	regulation of vascular endothelial growth factor receptor signaling pathway	0.00678305	0.0214493	HHEX/ITGA5/ITGB3/HIF1A	4
BP	GO:0048841	regulation of axon extension involved in axon guidance	0.00678305	0.0214493	SEMA7A/WNT5A/CXCL12/BMPR2	4
BP	GO:0050858	negative regulation of antigen receptor-mediated signaling pathway	0.00678305	0.0214493	LGALS3/CEACAM1/EZR/THY1	4
BP	GO:0050974	detection of mechanical stimulus involved in sensory perception	0.00678305	0.0214493	ITGA2/COL11A1/CXCL12/HPN	4
BP	GO:0060351	cartilage development involved in endochondral bone morphogenesis	0.00678305	0.0214493	COL1A1/COMP/SERPINH1/MMP13	4
BP	GO:0061842	microtubule organizing center localization	0.00678305	0.0214493	EZR/DLGAP5/ASPM/GPSM2	4
BP	GO:0071353	cellular response to interleukin-4	0.00678305	0.0214493	LEF1/PML/XBP1/MRC1	4
BP	GO:0023061	signal release	0.00680433	0.0215022	EFNA5/F2R/INHBA/PSEN1/CXCL12/KLF7/PPARG/AQP1/ALOX5/ANXA1/LIF/ABCA1/IL1A/HIF1A/CFTR/ADM/HLA-DRB1/SPP1/SFRP1/PTGS2	20
BP	GO:1903578	regulation of ATP metabolic process	0.00681425	0.021504	PSEN1/AK4/SLC25A12/ENO1/SLC4A4/HIF1A	6
BP	GO:0007259	receptor signaling pathway via JAK-STAT	0.00681858	0.021504	ERBB4/F2R/STAT1/IL18/EGF/NMI/LIF/CCL2/CYP1B1/IL7R	10
BP	GO:1990138	neuron projection extension	0.00681858	0.021504	FN1/SEMA7A/EDNRA/CTTN/WNT5A/ITGB1/CXCL12/CTNNB1/BMPR2/NEDD4L	10
BP	GO:0019217	regulation of fatty acid metabolic process	0.00686814	0.0215912	CEACAM1/PDK4/PPARG/ANXA1/CD74/PTGS2/NR4A3	7
BP	GO:0010823	negative regulation of mitochondrion organization	0.00687368	0.0215912	BCL2L1/CLU/PPARG/BNIP3/TFRC	5
BP	GO:0021872	forebrain generation of neurons	0.00687368	0.0215912	LEF1/PROX1/INHBA/ASPM/PAX6	5
BP	GO:0043392	negative regulation of DNA binding	0.00687368	0.0215912	LEF1/PSEN1/NEK2/ID1/IFI16	5
BP	GO:0046622	positive regulation of organ growth	0.00687368	0.0215912	ERBB4/PROX1/CDK1/WNT2/TGFBR3	5
BP	GO:0060612	adipose tissue development	0.00687368	0.0215912	RASAL2/ACAT1/KLF7/PPARG/XBP1	5
CC	GO:0044214	spanning component of plasma membrane	0.00682907	0.0216164	ERBB4/BMPR2/SLC4A4	3
BP	GO:0050768	negative regulation of neurogenesis	0.00694497	0.0218007	SEMA7A/WNT5A/PROX1/PSEN1/CTNNB1/ID1/THY1/PAX6/SPP1	9
BP	GO:0043393	regulation of protein binding	0.00700162	0.0219639	CTHRC1/ANXA2/WNT5A/PSEN1/DKK1/ID1/MMP9/TGFBR1/LRP1/LOX/TGFBR3	11
BP	GO:0050708	regulation of protein secretion	0.00705027	0.0221018	EFNA5/F2R/EZR/KLF7/PPARG/ALOX5/IL1A/TGFB2/HIF1A/ANKRD1/CFTR/HLA-DRB1/SFRP1	13
CC	GO:0032588	trans-Golgi network membrane	0.00710786	0.0221871	LGR5/HLA-DRA/HLA-DQB1/CD74/HLA-DQA1/HLA-DPA1/HLA-DRB1	7
CC	GO:0030670	phagocytic vesicle membrane	0.00711975	0.0221871	TAP1/TAP2/HLA-C/HLA-B/HLA-A/CYBB	6
BP	GO:0000077	DNA damage checkpoint signaling	0.00710918	0.0222569	PML/FANCD2/CHEK1/BRCA2/DTL/BRIP1/CDK1/MUC1	8
BP	GO:0030301	cholesterol transport	0.00710918	0.0222569	ANXA2/CLU/PPARG/EGF/LRP1/ABCA1/MSR1/CFTR	8
CC	GO:0005774	vacuolar membrane	0.00722002	0.0223265	ANXA2/MCOLN3/PSEN1/ANPEP/VLDLR/BST2/CP/EGF/IFITM1/LRP1/CD68/HLA-DRA/HLA-DQB1/CD74/HLA-DQA1/HLA-DPA1/CFTR/HLA-DRB1/VNN1	19
MF	GO:0003823	antigen binding	0.00269904	0.022492	TAP1/TAP2/HLA-C/HLA-B/HLA-A/HLA-DRA/HLA-DQB1/HLA-DQA1/HLA-DPA1/HLA-DRB1/IL7R	11
BP	GO:0035296	regulation of tube diameter	0.0072516	0.0226577	EDNRA/F2R/ACTA2/COMP/BMPR2/MMP2/ADM/HBB/PTGS2	9
BP	GO:0045598	regulation of fat cell differentiation	0.0072516	0.0226577	MMP11/WNT5A/PPARG/XBP1/ALOX5/SFRP2/RARRES2/SFRP1/PTGS2	9
BP	GO:0097746	blood vessel diameter maintenance	0.0072516	0.0226577	EDNRA/F2R/ACTA2/COMP/BMPR2/MMP2/ADM/HBB/PTGS2	9
BP	GO:0048662	negative regulation of smooth muscle cell proliferation	0.00727469	0.0227147	IGFBP3/IGFBP5/PDCD4/BMPR2/PPARG/TNFAIP3	6
BP	GO:0021953	central nervous system neuron differentiation	0.00737497	0.0230127	CDH11/SPOCK1/BTG2/PROX1/INHBA/PSEN1/NFIB/NTRK2/PAX6/NR4A2	10
BP	GO:0048675	axon extension	0.00745919	0.02326	FN1/SEMA7A/EDNRA/CTTN/WNT5A/ITGB1/CXCL12/BMPR2	8
BP	GO:0007431	salivary gland development	0.00754974	0.0233266	TGM2/NFIB/TGFB2/PAX6	4
BP	GO:0021799	cerebral cortex radially oriented cell migration	0.00754974	0.0233266	CTNNB1/COL3A1/SRGAP2C/LAMB1	4
BP	GO:0032743	positive regulation of interleukin-2 production	0.00754974	0.0233266	RUNX1/CD80/ANXA1/IL1A	4
BP	GO:0035025	positive regulation of Rho protein signal transduction	0.00754974	0.0233266	F2R/COL3A1/PDGFRB/ROBO1	4
BP	GO:0036474	cell death in response to hydrogen peroxide	0.00754974	0.0233266	MET/TXN/DDR2/NR4A3	4
BP	GO:0045648	positive regulation of erythrocyte differentiation	0.00754974	0.0233266	INHBA/STAT1/HIF1A/NCKAP1L	4
BP	GO:0051973	positive regulation of telomerase activity	0.00754974	0.0233266	GREM1/CTNNB1/NEK2/MYC	4
BP	GO:0055094	response to lipoprotein particle	0.00754974	0.0233266	ITGB1/PPARG/CD68/ABCA1	4
BP	GO:0061081	positive regulation of myeloid leukocyte cytokine production involved in immune response	0.00754974	0.0233266	SEMA7A/WNT5A/CD74/NR4A3	4
BP	GO:0070570	regulation of neuron projection regeneration	0.00754974	0.0233266	FLNA/PRRX1/THY1/SPP1	4
BP	GO:0090022	regulation of neutrophil chemotaxis	0.00754974	0.0233266	TNFAIP6/CD74/CXCL8/NCKAP1L	4
BP	GO:0090162	establishment of epithelial cell polarity	0.00754974	0.0233266	FERMT1/WNT5A/PTK7/MSN	4
BP	GO:1902624	positive regulation of neutrophil migration	0.00754974	0.0233266	IL1A/CD74/CXCL8/NCKAP1L	4
BP	GO:1905207	regulation of cardiocyte differentiation	0.00754974	0.0233266	EFNB2/DKK1/GATA4/TGFB2	4
BP	GO:0035150	regulation of tube size	0.00756848	0.0233692	EDNRA/F2R/ACTA2/COMP/BMPR2/MMP2/ADM/HBB/PTGS2	9
CC	GO:0099699	integral component of synaptic membrane	0.00764844	0.0234708	SLC16A3/SLC6A6/EFNB2/ERBB4/ITGB1/PSEN1/SLC1A2/CDH2/ITGB3	9
BP	GO:0051048	negative regulation of secretion	0.00766601	0.0236263	F2R/CEACAM1/INHBA/KLF7/EGF/ANXA1/LIF/CD74/NCKAP1L/SFRP1	10
BP	GO:0032642	regulation of chemokine production	0.00766677	0.0236263	TNFSF4/WNT5A/EPHA2/EIF2AK2/IL18/CD74/HIF1A	7
BP	GO:1902807	negative regulation of cell cycle G1/S phase transition	0.00766677	0.0236263	PML/ACVR1/INHBA/E2F7/MUC1/WEE1/CCL2	7
BP	GO:0003128	heart field specification	0.0077334	0.0237077	WNT5A/DKK1/ROBO1	3
BP	GO:0010958	regulation of amino acid import across plasma membrane	0.0077334	0.0237077	ITGB1/PSEN1/ARL6IP1	3
BP	GO:0035234	ectopic germ cell programmed cell death	0.0077334	0.0237077	BCL2L1/KITLG/IL1A	3
BP	GO:0044247	cellular polysaccharide catabolic process	0.0077334	0.0237077	PYGB/PGM2/PYGL	3
BP	GO:0045780	positive regulation of bone resorption	0.0077334	0.0237077	TFRC/ITGB3/SPP1	3
BP	GO:0051782	negative regulation of cell division	0.0077334	0.0237077	ASPM/E2F7/MYC	3
BP	GO:0060391	positive regulation of SMAD protein signal transduction	0.0077334	0.0237077	BMPR2/PPARG/TGFBR1	3
BP	GO:1903789	regulation of amino acid transmembrane transport	0.0077334	0.0237077	ITGB1/PSEN1/ARL6IP1	3
BP	GO:0046323	glucose import	0.00775719	0.0237652	SLC2A1/HK2/PRKCI/SLC1A2/GPC3/SLC2A3	6
CC	GO:0034358	plasma lipoprotein particle	0.00791915	0.0239361	CLU/VLDLR/APOH/MSR1	4
CC	GO:1990777	lipoprotein particle	0.00791915	0.0239361	CLU/VLDLR/APOH/MSR1	4
BP	GO:0046942	carboxylic acid transport	0.00785099	0.024037	SLC16A3/SLC6A6/SLC7A2/CEACAM1/ITGB1/PSEN1/ARL6IP1/SLC25A12/SLC1A2/NTRK2/ANXA1/IL1A/PTGS2/AQP9	14
BP	GO:2000377	regulation of reactive oxygen species metabolic process	0.00789582	0.0241585	HK2/BNIP3/PDGFRB/DHFR/MMP3/ALOX5/HIF1A/CYP1B1/THBS1	9
BP	GO:0032635	interleukin-6 production	0.00796583	0.0243412	TNFSF4/F2R/WNT5A/HLA-B/XBP1/IL1A/CD74/EREG/TNFAIP3/NCKAP1L	10
BP	GO:0032675	regulation of interleukin-6 production	0.00796583	0.0243412	TNFSF4/F2R/WNT5A/HLA-B/XBP1/IL1A/CD74/EREG/TNFAIP3/NCKAP1L	10
BP	GO:0032330	regulation of chondrocyte differentiation	0.00805691	0.0245717	RUNX2/LOXL2/GREM1/CTNNB1/TGFBR1	5
BP	GO:0045778	positive regulation of ossification	0.00805691	0.0245717	WNT5A/ACVR1/BMPR2/ALOX5/TGFB2	5
BP	GO:0051293	establishment of spindle localization	0.00805691	0.0245717	ITGB1/NDC80/GPSM2/MYH9/PAX6	5
BP	GO:0050864	regulation of B cell activation	0.00807237	0.02458	MMP14/TNFSF4/INHBA/AHR/XBP1/TNFRSF21/TFRC/CD74/TNFAIP3/NCKAP1L/SFRP1	11
BP	GO:0046879	hormone secretion	0.00807978	0.02458	EFNA5/INHBA/KLF7/PPARG/AQP1/ALOX5/ANXA1/LIF/HIF1A/CFTR/ADM/HLA-DRB1/SPP1/SFRP1	14
BP	GO:0006140	regulation of nucleotide metabolic process	0.00809086	0.02458	PDK4/PSEN1/AK4/SLC25A12/ENO1/SLC4A4/HIF1A	7
BP	GO:0032602	chemokine production	0.00809086	0.02458	TNFSF4/WNT5A/EPHA2/EIF2AK2/IL18/CD74/HIF1A	7
BP	GO:0032755	positive regulation of interleukin-6 production	0.00809086	0.02458	TNFSF4/F2R/WNT5A/XBP1/IL1A/CD74/EREG	7
BP	GO:0043279	response to alkaloid	0.00809086	0.02458	TGM2/BCL2L1/CHEK1/CCNA2/SLC1A2/GPI/FOSB	7
BP	GO:0031023	microtubule organizing center organization	0.00823383	0.0249821	CTNNB1/XPO1/NEK2/NDC80/CHEK1/STIL/BRCA2/KIF11/CDK1	9
BP	GO:0043535	regulation of blood vessel endothelial cell migration	0.00823383	0.0249821	EPHA2/SRPX2/PPARG/EFNA1/ANGPT2/ANXA1/HIF1A/THBS1/PTGS2	9
CC	GO:0030018	Z disc	0.0083299	0.0249897	SLC2A1/KRT19/PSEN1/CTNNB1/FHL2/FLNA/PAK1/DST	8
BP	GO:0015807	L-amino acid transport	0.00826232	0.0250524	SLC7A2/ITGB1/PSEN1/ARL6IP1/SLC25A12/SLC1A2	6
BP	GO:0048730	epidermis morphogenesis	0.00837133	0.0253504	IGFBP5/CTNNB1/TGFB2/TP63	4
BP	GO:0060914	heart formation	0.00837133	0.0253504	WNT5A/CTNNB1/DKK1/ROBO1	4
CC	GO:0005791	rough endoplasmic reticulum	0.00854174	0.0254354	PKM/PSEN1/ARL6IP1/PLOD2/CYBB/TP63	6
BP	GO:0072503	cellular divalent inorganic cation homeostasis	0.00850611	0.0257309	CEMIP/EDNRA/PML/F2R/WNT5A/TGM2/MCOLN3/PSEN1/CXCL12/ATP2C1/FLNA/BNIP3/THY1/CXCL10/ITGB3	15
BP	GO:0046883	regulation of hormone secretion	0.0085079	0.0257309	EFNA5/INHBA/KLF7/PPARG/ALOX5/ANXA1/LIF/HIF1A/CFTR/HLA-DRB1/SPP1/SFRP1	12
BP	GO:0043280	positive regulation of cysteine-type endopeptidase activity involved in apoptotic process	0.00858727	0.0259543	EGLN3/PML/F2R/MYC/PPARG/ROBO1/FAS/TNFSF10	8
BP	GO:0002686	negative regulation of leukocyte migration	0.00869846	0.02624	GREM1/CXCL12/PTGER4/TNFAIP6/CCL2	5
BP	GO:0031103	axon regeneration	0.00869846	0.02624	FLNA/DHFR/MMP2/SPP1/TNC	5
BP	GO:0071385	cellular response to glucocorticoid stimulus	0.00869846	0.02624	ACVR1/PLAT/AQP1/ANXA1/CYP1B1	5
BP	GO:0010827	regulation of glucose transmembrane transport	0.00879064	0.0264842	EDNRA/HK2/PRKCI/SLC1A2/GPC3/NR4A3	6
BP	GO:0072088	nephron epithelium morphogenesis	0.00879064	0.0264842	GREM1/CTNNB1/STAT1/MYC/LIF/GPC3	6
BP	GO:0030183	B cell differentiation	0.00894276	0.0269253	MMP14/ITGB1/INHBA/HHEX/LGALS1/XBP1/CDH17/NCKAP1L/SFRP1	9
BP	GO:0010885	regulation of cholesterol storage	0.009028	0.0270439	PPARG/ABCA1/MSR1	3
BP	GO:0045953	negative regulation of natural killer cell mediated cytotoxicity	0.009028	0.0270439	CEACAM1/HLA-B/HLA-A	3
BP	GO:0051797	regulation of hair follicle development	0.009028	0.0270439	FERMT1/WNT5A/TGFB2	3
BP	GO:0060977	coronary vasculature morphogenesis	0.009028	0.0270439	PDGFRB/TGFBR1/TGFBR3	3
BP	GO:0070242	thymocyte apoptotic process	0.009028	0.0270439	WNT5A/EFNA1/HIF1A	3
BP	GO:0072074	kidney mesenchyme development	0.009028	0.0270439	STAT1/MYC/PDGFRB	3
BP	GO:1902170	cellular response to reactive nitrogen species	0.009028	0.0270439	CCNA2/AQP1/MMP3	3
BP	GO:2001185	regulation of CD8-positive, alpha-beta T cell activation	0.009028	0.0270439	RUNX1/HLA-A/NCKAP1L	3
CC	GO:0042581	specific granule	0.00932295	0.0275575	PLAU/CEACAM1/ITGAV/LYZ/TIMP2/PLAUR/OLR1/CYBB/SLC2A3	9
BP	GO:0046394	carboxylic acid biosynthetic process	0.00921292	0.0275803	CEACAM1/PROX1/PDK4/SLC25A12/XBP1/DHFR/ALDH1A1/CTH/ALOX5/ANXA1/PLOD2/IDO1/CRABP2/CD74/PTGS2	15
BP	GO:0033280	response to vitamin D	0.00924933	0.0275843	CXCL10/SPP1/SFRP1/PTGS2	4
BP	GO:0045589	regulation of regulatory T cell differentiation	0.00924933	0.0275843	FANCD2/TNFSF4/HLA-DRA/HLA-DRB1	4
BP	GO:0050869	negative regulation of B cell activation	0.00924933	0.0275843	INHBA/TNFRSF21/TNFAIP3/SFRP1	4
BP	GO:0060323	head morphogenesis	0.00924933	0.0275843	LEF1/COL1A1/DKK1/MMP2	4
BP	GO:0070670	response to interleukin-4	0.00924933	0.0275843	LEF1/PML/XBP1/MRC1	4
BP	GO:1905332	positive regulation of morphogenesis of an epithelium	0.00924933	0.0275843	GREM1/CTNNB1/EGF/LIF	4
BP	GO:0045216	cell-cell junction organization	0.00926624	0.0276173	ECT2/CDH11/EFNB2/PRKCI/F2R/EPHA2/CTNNB1/FLNA/CDH2/TGFBR1/TGFB2	11
BP	GO:1902475	L-alpha-amino acid transmembrane transport	0.00934272	0.0278276	SLC7A2/ITGB1/PSEN1/ARL6IP1/SLC25A12/SLC1A2	6
CC	GO:0005793	endoplasmic reticulum-Golgi intermediate compartment	0.00949595	0.027864	FN1/CD55/ANPEP/TAP1/TAP2/SERPINH1/ROBO1/AREG	8
BP	GO:0001954	positive regulation of cell-matrix adhesion	0.00937447	0.0279046	FERMT1/THY1/SDC4/ITGB3/SFRP1	5
CC	GO:0097431	mitotic spindle pole	0.00958732	0.0279283	ASPM/FAM83D/SMC6/GPSM2	4
BP	GO:0071383	cellular response to steroid hormone stimulus	0.00958498	0.0285132	ACVR1/PLAT/PMEPA1/PAK1/AQP1/ANXA1/TFPI/TP63/SFRP1/CYP1B1/NR4A3	11
BP	GO:0016053	organic acid biosynthetic process	0.00970944	0.0288652	CEACAM1/PROX1/PDK4/SLC25A12/XBP1/DHFR/ALDH1A1/CTH/ALOX5/ANXA1/PLOD2/IDO1/CRABP2/CD74/PTGS2	15
BP	GO:0009306	protein secretion	0.009731	0.0289111	EFNA5/F2R/EZR/KLF7/COMP/PPARG/ALOX5/ANXA1/ABCA1/IL1A/TGFB2/HIF1A/ANKRD1/CFTR/HLA-DRB1/SFRP1	16
BP	GO:0061333	renal tubule morphogenesis	0.00991911	0.0294514	GREM1/CTNNB1/MYC/LGR5/COL4A1/GPC3	6
BP	GO:0046620	regulation of organ growth	0.00996146	0.0295586	ERBB4/RUNX1/PROX1/CDK1/WNT2/TGFBR1/TGFBR3	7
BP	GO:0035592	establishment of protein localization to extracellular region	0.00997495	0.02958	EFNA5/F2R/EZR/KLF7/COMP/PPARG/ALOX5/ANXA1/ABCA1/IL1A/TGFB2/HIF1A/ANKRD1/CFTR/HLA-DRB1/SFRP1	16
BP	GO:0045071	negative regulation of viral genome replication	0.0100858	0.0298899	PROX1/EIF2AK2/BST2/IFITM1/IFI16	5
BP	GO:0032868	response to insulin	0.0101198	0.0299586	SLC2A1/PKM/PRKCI/CEACAM1/PDK4/COL1A1/STAT1/PPARG/CTSK/XBP1/RARRES2/TNFSF10/ADM	13
BP	GO:0002068	glandular epithelial cell development	0.0101852	0.0299586	WNT5A/CDH2/PAX6/HIF1A	4
BP	GO:0003176	aortic valve development	0.0101852	0.0299586	BMPR2/EFNA1/ROBO1/GATA4	4
BP	GO:0010934	macrophage cytokine production	0.0101852	0.0299586	SEMA7A/WNT5A/CD74/TGFB2	4
BP	GO:0010935	regulation of macrophage cytokine production	0.0101852	0.0299586	SEMA7A/WNT5A/CD74/TGFB2	4
BP	GO:0031076	embryonic camera-type eye development	0.0101852	0.0299586	WNT5A/PROX1/ZEB1/PAX6	4
BP	GO:0034110	regulation of homotypic cell-cell adhesion	0.0101852	0.0299586	CEACAM1/PLAUR/PDPN/MMRN1	4
BP	GO:0048846	axon extension involved in axon guidance	0.0101852	0.0299586	SEMA7A/WNT5A/CXCL12/BMPR2	4
BP	GO:0048854	brain morphogenesis	0.0101852	0.0299586	FANCD2/WNT5A/PSEN1/CDH2	4
BP	GO:0055023	positive regulation of cardiac muscle tissue growth	0.0101852	0.0299586	ERBB4/CDK1/WNT2/TGFBR3	4
BP	GO:0071402	cellular response to lipoprotein particle stimulus	0.0101852	0.0299586	ITGB1/PPARG/CD68/ABCA1	4
BP	GO:1902284	neuron projection extension involved in neuron projection guidance	0.0101852	0.0299586	SEMA7A/WNT5A/CXCL12/BMPR2	4
CC	GO:0032994	protein-lipid complex	0.0105006	0.030007	CLU/VLDLR/APOH/MSR1	4
CC	GO:0016327	apicolateral plasma membrane	0.0105995	0.030007	KRT19/CTNNB1/CDH2	3
CC	GO:0042827	platelet dense granule	0.0105995	0.030007	ECM1/APOH/RARRES2	3
CC	GO:0097038	perinuclear endoplasmic reticulum	0.0105995	0.030007	NOX4/CLU/CYBB	3
BP	GO:0045088	regulation of innate immune response	0.0102768	0.0302092	WNT5A/CEACAM1/MMP12/PAK1/HLA-B/HLA-A/PPARG/NMI/BIRC3/IFI16/EREG/TNFAIP3	12
BP	GO:0050714	positive regulation of protein secretion	0.0102841	0.030212	EZR/PPARG/IL1A/TGFB2/HIF1A/ANKRD1/CFTR/HLA-DRB1	8
CC	GO:1902911	protein kinase complex	0.0107794	0.0302927	PRKCI/ACVR1/CCNB1/CCNB2/CCNA2/CDK1/TGFBR1/CKS2	8
CC	GO:0000776	kinetochore	0.0108511	0.0302927	CENPF/CCNB1/PSEN1/XPO1/BUB1/NEK2/NDC80/NUF2/BUB1B	9
BP	GO:0009914	hormone transport	0.0103854	0.0304473	EFNA5/INHBA/KLF7/PPARG/AQP1/ALOX5/ANXA1/LIF/HIF1A/CFTR/ADM/HLA-DRB1/SPP1/SFRP1	14
BP	GO:0000272	polysaccharide catabolic process	0.0104417	0.0304473	PYGB/PGM2/PYGL	3
BP	GO:0002577	regulation of antigen processing and presentation	0.0104417	0.0304473	CD68/CD74/THBS1	3
BP	GO:0002716	negative regulation of natural killer cell mediated immunity	0.0104417	0.0304473	CEACAM1/HLA-B/HLA-A	3
BP	GO:0002837	regulation of immune response to tumor cell	0.0104417	0.0304473	CEACAM1/AHR/HLA-DRB1	3
BP	GO:0035455	response to interferon-alpha	0.0104417	0.0304473	EIF2AK2/BST2/IFITM1	3
BP	GO:0042953	lipoprotein transport	0.0104417	0.0304473	PPARG/LRP1/MSR1	3
BP	GO:0045655	regulation of monocyte differentiation	0.0104417	0.0304473	MYC/CD74/HLA-DRB1	3
BP	GO:0048670	regulation of collateral sprouting	0.0104417	0.0304473	EFNA5/CRABP2/SPP1	3
BP	GO:0071379	cellular response to prostaglandin stimulus	0.0104417	0.0304473	TNFSF4/PTGER4/SFRP1	3
BP	GO:0098543	detection of other organism	0.0104417	0.0304473	HLA-B/HLA-A/HLA-DRB1	3
BP	GO:1905209	positive regulation of cardiocyte differentiation	0.0104417	0.0304473	EFNB2/GATA4/TGFB2	3
BP	GO:0003333	amino acid transmembrane transport	0.0104746	0.0305057	SLC6A6/SLC7A2/ITGB1/PSEN1/ARL6IP1/SLC25A12/SLC1A2	7
BP	GO:0042100	B cell proliferation	0.0104746	0.0305057	LEF1/AHR/TNFRSF21/TFRC/CD74/NCKAP1L/IL7R	7
BP	GO:0007416	synapse assembly	0.0107011	0.031146	EFNA5/EFNB2/ERBB4/THBS2/WNT5A/DKK1/SRPX2/SRGAP2C/NTRK2/CDH2	10
BP	GO:0019079	viral genome replication	0.0107446	0.031215	PROX1/TOP2A/EIF2AK2/BST2/IFITM1/IFI16/CXCL8/CCL2	8
BP	GO:0032612	interleukin-1 production	0.0107446	0.031215	PML/F2R/WNT5A/CEACAM1/HK1/ANXA1/IFI16/TNFAIP3	8
BP	GO:0032652	regulation of interleukin-1 production	0.0107446	0.031215	PML/F2R/WNT5A/CEACAM1/HK1/ANXA1/IFI16/TNFAIP3	8
BP	GO:0033619	membrane protein proteolysis	0.0108333	0.0314145	PSEN1/TIMP2/TIMP1/MYH9/MMP7	5
BP	GO:0048010	vascular endothelial growth factor receptor signaling pathway	0.0108333	0.0314145	SULF1/HHEX/ITGA5/ITGB3/HIF1A	5
BP	GO:0048599	oocyte development	0.0108333	0.0314145	EDNRA/CTNNB1/TRIP13/BRCA2/EREG	5
BP	GO:1901796	regulation of signal transduction by p53 class mediator	0.0110067	0.0318978	PML/NUAK1/CHEK1/MYC/MUC1/CD74/ANKRD1	7
BP	GO:0044773	mitotic DNA damage checkpoint signaling	0.011147	0.0322816	PML/FANCD2/CHEK1/DTL/CDK1/MUC1	6
BP	GO:0002369	T cell cytokine production	0.0111802	0.0322816	CD55/TNFSF4/IL18/HLA-A	4
BP	GO:0002724	regulation of T cell cytokine production	0.0111802	0.0322816	CD55/TNFSF4/IL18/HLA-A	4
BP	GO:0003203	endocardial cushion morphogenesis	0.0111802	0.0322816	ACVR1/ROBO1/TGFBR1/TGFB2	4
BP	GO:0040001	establishment of mitotic spindle localization	0.0111802	0.0322816	ITGB1/NDC80/GPSM2/PAX6	4
BP	GO:0045773	positive regulation of axon extension	0.0111802	0.0322816	FN1/SEMA7A/CXCL12/BMPR2	4
BP	GO:0051208	sequestering of calcium ion	0.0112202	0.0323774	CEMIP/F2R/MCOLN3/PSEN1/FLNA/THY1/CXCL10/ITGB3	8
CC	GO:0099240	intrinsic component of synaptic membrane	0.0116822	0.0323879	SLC16A3/SLC6A6/EFNB2/ERBB4/ITGB1/PSEN1/SLC1A2/CDH2/ITGB3	9
BP	GO:0007611	learning or memory	0.011347	0.0327231	ITGA3/BTG2/ITGB1/CAMK2N1/PSEN1/VLDLR/DKK1/NTRK2/GPI/ITGA5/HIF1A/MME/PTGS2	13
BP	GO:0002253	activation of immune response	0.0113708	0.0327717	LGALS3/CD55/CEACAM1/EZR/PSEN1/CLU/PAK1/HLA-A/TNFRSF21/THY1/IFI16/HLA-DQB1/C1S/C1R/HLA-DRB1/NCKAP1L/NR4A3	17
MF	GO:0005172	vascular endothelial growth factor receptor binding	0.00401657	0.0330632	GREM1/ITGA5/ITGB3	3
BP	GO:0035773	insulin secretion involved in cellular response to glucose stimulus	0.0116177	0.033463	EFNA5/KLF7/HIF1A/CFTR/HLA-DRB1	5
MF	GO:0001540	amyloid-beta binding	0.0041471	0.0337264	ITGA2/CLU/MARCO/LRP1/CD74/MSR1/TGFB2	7
BP	GO:0060395	SMAD protein signal transduction	0.0117996	0.0339453	INHBA/BMPR2/PPARG/TGFBR1/LRP1/TGFB2	6
BP	GO:2001021	negative regulation of response to DNA damage stimulus	0.0117996	0.0339453	BCL2L1/CXCL12/CLU/SFRP2/MUC1/CD74	6
BP	GO:0032535	regulation of cellular component size	0.0118214	0.0339874	FN1/EFNA5/CAPG/SEMA7A/CTTN/WNT5A/EZR/CXCL12/CIT/BMPR2/AQP1/MSN/CRABP2/SPP1/NCKAP1L/IL7R	16
BP	GO:0002089	lens morphogenesis in camera-type eye	0.0119763	0.0341208	PROX1/EPHA2/CTNNB1	3
BP	GO:0002834	regulation of response to tumor cell	0.0119763	0.0341208	CEACAM1/AHR/HLA-DRB1	3
BP	GO:0003177	pulmonary valve development	0.0119763	0.0341208	BMPR2/ROBO1/TGFB2	3
BP	GO:0006590	thyroid hormone generation	0.0119763	0.0341208	HPN/CTSB/CTSK	3
BP	GO:0007063	regulation of sister chromatid cohesion	0.0119763	0.0341208	RAD21/CTNNB1/BUB1	3
BP	GO:0010878	cholesterol storage	0.0119763	0.0341208	PPARG/ABCA1/MSR1	3
BP	GO:0030502	negative regulation of bone mineralization	0.0119763	0.0341208	ECM1/GREM1/HIF1A	3
BP	GO:0044872	lipoprotein localization	0.0119763	0.0341208	PPARG/LRP1/MSR1	3
BP	GO:0045821	positive regulation of glycolytic process	0.0119763	0.0341208	PSEN1/SLC4A4/HIF1A	3
BP	GO:0071498	cellular response to fluid shear stress	0.0119763	0.0341208	TFPI2/MMP2/PTGS2	3
BP	GO:0090026	positive regulation of monocyte chemotaxis	0.0119763	0.0341208	CXCL12/CXCL10/SERPINE1	3
BP	GO:0090141	positive regulation of mitochondrial fission	0.0119763	0.0341208	RALA/BNIP3/DCN	3
BP	GO:1901522	positive regulation of transcription from RNA polymerase II promoter involved in cellular response to chemical stimulus	0.0119763	0.0341208	RUNX2/XBP1/HIF1A	3
BP	GO:1903204	negative regulation of oxidative stress-induced neuron death	0.0119763	0.0341208	CTNNB1/HIF1A/NR4A3	3
BP	GO:1904754	positive regulation of vascular associated smooth muscle cell migration	0.0119763	0.0341208	IGFBP5/DDR2/NR4A3	3
BP	GO:0032373	positive regulation of sterol transport	0.0122357	0.034776	ANXA2/PPARG/LRP1/ABCA1	4
BP	GO:0032376	positive regulation of cholesterol transport	0.0122357	0.034776	ANXA2/PPARG/LRP1/ABCA1	4
BP	GO:0035136	forelimb morphogenesis	0.0122357	0.034776	RUNX2/CTNNB1/CRABP2/TP63	4
BP	GO:0045066	regulatory T cell differentiation	0.0122357	0.034776	FANCD2/TNFSF4/HLA-DRA/HLA-DRB1	4
BP	GO:1903670	regulation of sprouting angiogenesis	0.0124399	0.035335	PKM/CEACAM1/ALOX5/ITGA5/THBS1	5
BP	GO:0055013	cardiac muscle cell development	0.0124786	0.0354236	PROX1/FHL2/SGCB/PDGFRB/CDK1/GATA4	6
MF	GO:0003779	actin binding	0.00448724	0.0360581	TPM4/FERMT1/ANTXR1/CAPG/ANLN/CTTN/CEACAM1/ITGB1/PLS3/EZR/CALD1/TPM2/FLNA/MYLK/CORO1C/MSN/MYH9/ENC1/DST/S100A4	20
BP	GO:0043467	regulation of generation of precursor metabolites and energy	0.0127404	0.036145	CCNB1/PSEN1/AK4/SLC25A12/BNIP3/CDK1/SLC4A4/HIF1A	8
BP	GO:0110053	regulation of actin filament organization	0.0130398	0.0369722	CAPG/MET/CTTN/CXCL12/CIT/FLNA/PAK1/ID1/PTGER4/TGFBR1/SDC4/NCKAP1L/SFRP1	13
MF	GO:0046875	ephrin receptor binding	0.00470339	0.0373505	EFNA5/EFNB2/AQP1/EFNA1	4
BP	GO:0010921	regulation of phosphatase activity	0.0131846	0.0373604	ITGA2/LGALS3/NUAK1/PDGFRB/TGFB2/NCKAP1L	6
BP	GO:0015918	sterol transport	0.0132791	0.0375219	ANXA2/CLU/PPARG/EGF/LRP1/ABCA1/MSR1/CFTR	8
BP	GO:1900180	regulation of protein localization to nucleus	0.0132791	0.0375219	FERMT1/ECT2/PSEN1/FLNA/CDK1/LIF/TFRC/PTGS2	8
BP	GO:0030865	cortical cytoskeleton organization	0.0133006	0.0375219	ECT2/ANLN/RACGAP1/EZR/NCKAP1L	5
BP	GO:1900024	regulation of substrate adhesion-dependent cell spreading	0.0133006	0.0375219	EFNA5/FLNA/PDPN/CORO1C/ITGB3	5
BP	GO:1902893	regulation of miRNA transcription	0.0133006	0.0375219	NFIB/MYC/PPARG/TGFB2/HIF1A	5
BP	GO:0001708	cell fate specification	0.0133322	0.0375219	WNT5A/ITGB1/PSEN1/CTNNB1/DKK1/SFRP2/PAX6	7
BP	GO:0030038	contractile actin filament bundle assembly	0.0133322	0.0375219	MET/ITGB5/PAK1/PTGER4/TGFBR1/SDC4/SFRP1	7
BP	GO:0043149	stress fiber assembly	0.0133322	0.0375219	MET/ITGB5/PAK1/PTGER4/TGFBR1/SDC4/SFRP1	7
BP	GO:0000266	mitochondrial fission	0.0133529	0.0375219	RALA/PPARG/BNIP3/DCN	4
BP	GO:0032506	cytokinetic process	0.0133529	0.0375219	ECT2/ANLN/RACGAP1/MYH9	4
BP	GO:0045740	positive regulation of DNA replication	0.0133529	0.0375219	E2F7/EGF/CDK1/EREG	4
BP	GO:0051294	establishment of spindle orientation	0.0133529	0.0375219	ITGB1/NDC80/GPSM2/PAX6	4
BP	GO:0071392	cellular response to estradiol stimulus	0.0133529	0.0375219	ITGA2/CCNA2/MMP2/SFRP1	4
BP	GO:1903115	regulation of actin filament-based movement	0.0133529	0.0375219	ACTA2/PDPN/GATA4/DSC2	4
MF	GO:0005041	low-density lipoprotein particle receptor activity	0.00493278	0.0378367	VLDLR/OLR1/LRP1	3
MF	GO:0048185	activin binding	0.00493278	0.0378367	ACVR1/TGFBR1/TGFBR3	3
MF	GO:1904680	peptide transmembrane transporter activity	0.00493278	0.0378367	TAP1/TAP2/CDH17	3
BP	GO:0003228	atrial cardiac muscle tissue development	0.0136335	0.038106	EDNRA/PROX1/WNT2	3
BP	GO:0010042	response to manganese ion	0.0136335	0.038106	FIBIN/TFRC/PTGS2	3
BP	GO:0015669	gas transport	0.0136335	0.038106	MYC/AQP1/HBB	3
BP	GO:0043371	negative regulation of CD4-positive, alpha-beta T cell differentiation	0.0136335	0.038106	TNFSF4/RUNX1/ANXA1	3
BP	GO:0048485	sympathetic nervous system development	0.0136335	0.038106	EDNRA/CTNNB1/TP63	3
BP	GO:0048634	regulation of muscle organ development	0.0136335	0.038106	LEF1/CENPF/LOX	3
BP	GO:0071404	cellular response to low-density lipoprotein particle stimulus	0.0136335	0.038106	ITGB1/PPARG/ABCA1	3
BP	GO:2001044	regulation of integrin-mediated signaling pathway	0.0136335	0.038106	FLNA/TIMP1/LAMB1	3
BP	GO:0008217	regulation of blood pressure	0.0136335	0.038106	EDNRA/F2R/COL1A2/ANPEP/ACTA2/BMPR2/PPARG/ADM/HBB/PTGS2	10
MF	GO:0005044	scavenger receptor activity	0.00504891	0.0382923	TMPRSS4/LOXL2/MARCO/LRP1/MSR1	5
CC	GO:0045171	intercellular bridge	0.0140166	0.0384348	PRKCI/TPX2/PRC1/FAM83D/CDC6/TUBB	6
CC	GO:0005802	trans-Golgi network	0.0140545	0.0384348	POSTN/ATP2C1/FLNA/TGFBI/LGR5/HLA-DRA/HLA-DQB1/CD74/HLA-DQA1/HLA-DPA1/MME/HLA-DRB1	12
BP	GO:0071333	cellular response to glucose stimulus	0.0138343	0.0386444	NOX4/EFNA5/KLF7/XBP1/GATA4/HIF1A/CFTR/HLA-DRB1	8
BP	GO:0000281	mitotic cytokinesis	0.0139181	0.0388554	ECT2/ANLN/RACGAP1/KIF23/CIT/KIF4A	6
BP	GO:1904035	regulation of epithelial cell apoptotic process	0.0139648	0.0389626	PRKCI/PDCD4/SFRP4/TNFAIP3/CCL2/THBS1/SERPINE1	7
BP	GO:0032233	positive regulation of actin filament bundle assembly	0.0142007	0.039574	PAK1/ID1/TGFBR1/SDC4/SFRP1	5
BP	GO:0061614	miRNA transcription	0.0142007	0.039574	NFIB/MYC/PPARG/TGFB2/HIF1A	5
MF	GO:0017147	Wnt-protein binding	0.00532656	0.0399492	CTHRC1/SFRP2/SFRP4/SFRP1	4
BP	GO:0014912	negative regulation of smooth muscle cell migration	0.014533	0.040381	IGFBP3/IGFBP5/LRP1/SERPINE1	4
BP	GO:0030513	positive regulation of BMP signaling pathway	0.014533	0.040381	SULF1/BMPR2/GATA4/GPC3	4
BP	GO:0051281	positive regulation of release of sequestered calcium ion into cytosol	0.014533	0.040381	CEMIP/F2R/THY1/CXCL10	4
BP	GO:0150077	regulation of neuroinflammatory response	0.014533	0.040381	IL18/MMP9/MMP3/PTGS2	4
BP	GO:2000008	regulation of protein localization to cell surface	0.014533	0.040381	ERBB4/CTNNB1/EGF/NEDD4L	4
BP	GO:0018958	phenol-containing compound metabolic process	0.0146185	0.0405944	EDNRA/WNT5A/HPN/CTSB/CTSK/TGFB2/NR4A2	7
BP	GO:0032092	positive regulation of protein binding	0.0146796	0.0406924	CTHRC1/ANXA2/WNT5A/PSEN1/MMP9/LRP1	6
BP	GO:0033077	T cell differentiation in thymus	0.0146796	0.0406924	CTNNB1/ZEB1/IL1A/CD74/VNN1/IL7R	6
BP	GO:0061053	somite development	0.0146796	0.0406924	LEF1/WNT5A/PSEN1/DKK1/SFRP2/SFRP1	6
BP	GO:0006606	protein import into nucleus	0.0147326	0.0408154	FERMT1/ECT2/PML/PSEN1/MMP12/FLNA/CDK1/KPNA2/PTGS2	9
MF	GO:0043177	organic acid binding	0.00557669	0.0413656	EGLN3/P4HA1/PPARG/DHFR/TYMS/PLOD2/CRABP2/SERPINA5/HBB	9
BP	GO:0050890	cognition	0.0149625	0.0414277	ITGA3/BTG2/ITGB1/CAMK2N1/PSEN1/VLDLR/DKK1/NTRK2/GPI/HLA-DRA/ITGA5/HIF1A/MME/PTGS2	14
BP	GO:0071331	cellular response to hexose stimulus	0.0149953	0.0414942	NOX4/EFNA5/KLF7/XBP1/GATA4/HIF1A/CFTR/HLA-DRB1	8
MF	GO:0008017	microtubule binding	0.00567632	0.0416469	GAPDH/CENPF/TPX2/RACGAP1/EZR/KIF23/DLGAP5/PRC1/FAM83D/KIF14/KIF11/KIF4A/DST/NDRG1	14
CC	GO:0000779	condensed chromosome, centromeric region	0.0154884	0.0418278	CENPF/CCNB1/PSEN1/XPO1/BUB1/NEK2/NDC80/NUF2/BUB1B	9
CC	GO:0035578	azurophil granule lumen	0.0155033	0.0418278	PYGB/ANXA2/PLAC8/LYZ/TUBB/PRSS2	6
BP	GO:0046579	positive regulation of Ras protein signal transduction	0.0151407	0.0418721	F2R/COL3A1/PDGFRB/ROBO1/KITLG	5
BP	GO:0045445	myoblast differentiation	0.0152937	0.0422705	SDC1/IGFBP3/ITGB1/GREM1/IL18/LGALS1/CXCL10	7
BP	GO:0002689	negative regulation of leukocyte chemotaxis	0.0154145	0.042455	GREM1/TNFAIP6/CCL2	3
BP	GO:0035024	negative regulation of Rho protein signal transduction	0.0154145	0.042455	ITGA3/MET/ITGB1	3
BP	GO:0045723	positive regulation of fatty acid biosynthetic process	0.0154145	0.042455	ANXA1/CD74/PTGS2	3
BP	GO:0072677	eosinophil migration	0.0154145	0.042455	LGALS3/PTGER4/CCL2	3
BP	GO:1900120	regulation of receptor binding	0.0154145	0.042455	ANXA2/MMP9/LOX	3
BP	GO:2001169	regulation of ATP biosynthetic process	0.0154145	0.042455	AK4/SLC25A12/ENO1	3
BP	GO:0001523	retinoid metabolic process	0.0154696	0.0425076	ALDH1A1/ADH1B/LRP1/CRABP2/RARRES2/CYP1B1	6
BP	GO:0008543	fibroblast growth factor receptor signaling pathway	0.0154696	0.0425076	SULF1/RUNX2/WNT5A/CTNNB1/SHCBP1/THBS1	6
BP	GO:0010660	regulation of muscle cell apoptotic process	0.0154696	0.0425076	PDCD4/PPARG/BNIP3/GATA4/SFRP2/APOH	6
BP	GO:0050672	negative regulation of lymphocyte proliferation	0.0154696	0.0425076	CD80/TNFRSF21/PDCD1LG2/IDO1/SDC4/HLA-DRB1	6
BP	GO:0032872	regulation of stress-activated MAPK cascade	0.0155591	0.0427285	WNT5A/EZR/EIF2AK2/PDCD4/MYC/SFRP2/FAS/IL1A/TGFB2/SFRP1	10
BP	GO:0007281	germ cell development	0.0157262	0.0431625	EDNRA/ACVR1/BCL2L1/CTNNB1/ASPM/PRDM1/TRIP13/BRCA2/BRIP1/ANGPT2/LGR5/TNFAIP6/EREG/CFTR	14
BP	GO:0043029	T cell homeostasis	0.0157771	0.0432517	CCNB2/FAS/NCKAP1L/IL7R	4
BP	GO:0044786	cell cycle DNA replication	0.0157771	0.0432517	MCM6/E2F7/MCM4/BRCA2	4
MF	GO:0016641	oxidoreductase activity, acting on the CH-NH2 group of donors, oxygen as acceptor	0.00596493	0.0432939	LOXL2/LOXL1/LOX	3
BP	GO:0045664	regulation of neuron differentiation	0.0160706	0.0440167	ECT2/ITGB1/PROX1/CXCL12/ASPM/DKK1/ZEB1/SFRP2/PAX6/SFRP1	10
BP	GO:0001947	heart looping	0.0161214	0.0440167	WNT5A/PSEN1/STIL/GATA4/HIF1A	5
BP	GO:0010972	negative regulation of G2/M transition of mitotic cell cycle	0.0161214	0.0440167	RAD21/CHEK1/CDC6/DTL/CDK1	5
BP	GO:0019229	regulation of vasoconstriction	0.0161214	0.0440167	F2R/BMPR2/MMP2/ADM/PTGS2	5
BP	GO:0046530	photoreceptor cell differentiation	0.0161214	0.0440167	PRKCI/PRDM1/NTRK2/THY1/PAX6	5
BP	GO:0051445	regulation of meiotic cell cycle	0.0161214	0.0440167	WNT5A/ASPM/RAD51AP1/TRIP13/LIF	5
BP	GO:0071384	cellular response to corticosteroid stimulus	0.0161214	0.0440167	ACVR1/PLAT/AQP1/ANXA1/CYP1B1	5
BP	GO:0071326	cellular response to monosaccharide stimulus	0.0162253	0.0442748	NOX4/EFNA5/KLF7/XBP1/GATA4/HIF1A/CFTR/HLA-DRB1	8
BP	GO:0032370	positive regulation of lipid transport	0.0162886	0.044396	ANXA2/PPARG/LRP1/ABCA1/IL1A/SPP1	6
BP	GO:0032945	negative regulation of mononuclear cell proliferation	0.0162886	0.044396	CD80/TNFRSF21/PDCD1LG2/IDO1/SDC4/HLA-DRB1	6
BP	GO:0046777	protein autophosphorylation	0.0164019	0.044679	ERBB4/MELK/GREM1/PDGFC/EIF2AK2/NEK2/PAK1/NTRK2/PDGFRB/THY1/DDR2	11
CC	GO:0089717	spanning component of membrane	0.0171776	0.0457748	ERBB4/BMPR2/SLC4A4	3
CC	GO:0031594	neuromuscular junction	0.017194	0.0457748	SPOCK1/F2R/ITGB1/PSEN1/MYH9	5
BP	GO:0009855	determination of bilateral symmetry	0.016867	0.0459195	WNT5A/ACVR1/GREM1/PSEN1/CTNNB1/STIL/GATA4/HIF1A	8
BP	GO:0051170	import into nucleus	0.0169726	0.0461803	FERMT1/ECT2/PML/PSEN1/MMP12/FLNA/CDK1/KPNA2/PTGS2	9
BP	GO:0002347	response to tumor cell	0.0170861	0.046219	CEACAM1/AHR/HLA-A/HLA-DRB1	4
BP	GO:0007595	lactation	0.0170861	0.046219	HK2/ERBB4/XBP1/HIF1A	4
BP	GO:0016339	calcium-dependent cell-cell adhesion via plasma membrane cell adhesion molecules	0.0170861	0.046219	CDH11/ATP2C1/CDH2/CDH17	4
BP	GO:0051150	regulation of smooth muscle cell differentiation	0.0170861	0.046219	PDCD4/ZEB1/CTH/EREG	4
BP	GO:0051954	positive regulation of amine transport	0.0170861	0.046219	ITGB1/PSEN1/ARL6IP1/CXCL12	4
BP	GO:0060428	lung epithelium development	0.0170861	0.046219	AGR2/CTNNB1/NFIB/WNT2	4
BP	GO:0071548	response to dexamethasone	0.0170861	0.046219	PLAT/AQP1/FIBIN/CYP1B1	4
BP	GO:1900371	regulation of purine nucleotide biosynthetic process	0.0170861	0.046219	PDK4/AK4/SLC25A12/ENO1	4
BP	GO:0070302	regulation of stress-activated protein kinase signaling cascade	0.0171308	0.046219	WNT5A/EZR/EIF2AK2/PDCD4/MYC/SFRP2/FAS/IL1A/TGFB2/SFRP1	10
BP	GO:0007589	body fluid secretion	0.017137	0.046219	AGR2/HK2/ERBB4/AQP1/XBP1/HIF1A	6
BP	GO:0032507	maintenance of protein location in cell	0.0171436	0.046219	HK2/PML/HK1/KDELR3/TXN	5
BP	GO:0032613	interleukin-10 production	0.0171436	0.046219	TNFSF4/TNFRSF21/PDCD1LG2/IDO1/HLA-DRB1	5
BP	GO:0032653	regulation of interleukin-10 production	0.0171436	0.046219	TNFSF4/TNFRSF21/PDCD1LG2/IDO1/HLA-DRB1	5
BP	GO:0048247	lymphocyte chemotaxis	0.0171436	0.046219	WNT5A/CCL20/CXCL10/CCL18/CCL2	5
BP	GO:0050435	amyloid-beta metabolic process	0.0171436	0.046219	PSEN1/CLU/NTRK2/EFNA1/MME	5
BP	GO:0050771	negative regulation of axonogenesis	0.0171436	0.046219	SEMA7A/WNT5A/PSEN1/THY1/SPP1	5
BP	GO:0010623	programmed cell death involved in cell development	0.0173202	0.0465358	BCL2L1/KITLG/IL1A	3
BP	GO:0010839	negative regulation of keratinocyte proliferation	0.0173202	0.0465358	SFN/EFNB2/ZEB1	3
BP	GO:0036010	protein localization to endosome	0.0173202	0.0465358	EZR/EGF/MSN	3
BP	GO:0036120	cellular response to platelet-derived growth factor stimulus	0.0173202	0.0465358	CCNA2/PDGFRB/ITGB3	3
[truncated: 29 more rows]
