# Supplementary material for: Identification Of Prognostic Genes Associated With The Tumor Ecosystem In Pancreatic Ductal Adenocarcinoma
Source: Research Square preprint supplement (doi:10.21203/rs.3.rs-8698920/v1), 2026-02-16
Supplement: Supplementary file 9 [file e9b1bf9d5282a5c5b2f783a3.xlsx]

## Sheet: 01.uniCox_PH
Results of PH assumption test
phenotype	PH.p
age	0.288065
N.stage	0.376713
grade	0.320023
riskScore	0.336805
